# Supplementary material for: Cytological observation and transcriptome analysis reveal dynamic changes of Rhizoctonia solani colonization on leaf sheath and different genes recruited between the resistant and susceptible genotypes in rice
Source: Front Plant Sci. 2022 Nov 3;13:1055277. doi: 10.3389/fpls.2022.1055277 (PMC9669801; doi:10.3389/fpls.2022.1055277)
Supplement: Supplementary file 1 [file DataSheet_1.xlsx]

## Sheet: S1
Table S1 The gene-specific primers used in qRT-PCR
ID	Gene name	Forward primer	Reverse primer
LOC_Os01g02390	OsRLCK5	CCTTTCACAGTTAGTGGGTGGAAC	TGTACCTGTCTGGCGGATTGAC
LOC_Os12g02200	OsCIPK14	TCCTGTCACCGGAAGGGAAATTG	AGCACTAGTGAACCAGCAATCTG
LOC_Os11g35500	Xa21	AATTGGTTACGCAGCACCAGAG	TGACGGAGGCTCAATCCAGTTC
LOC_Os04g48850	OsACS2	TCTCGCAGTTCAAGAGGATCGC	CATAAACTGGGCCATCGCCTTTC
LOC_Os06g29810	Pid2	TTGGTTCTTGTTCCGGGCGATTG	AAACTCCACTGCAAGGCACACTC
LOC_Os02g34790	XIK1	AGGCATCGAACTGCACGAAG	CCTTGTTGTGTATGCAAGCTCTGG
LOC_Os01g28450	OsPR1b	AACTTCGTCGGACAGAGGCCTTAC	AAGGCGTGGATCAGACACTGAC

## Sheet: S2
Table S2 RNA-seq read counts and read mapping to the rice genome
Sample	Total Reads	Mapped Reads(Rate)	Mapping Rate(%)	GC Content	Q30(%)
Lemont(before inoculation)1	55056482	50869736	92.4	51.83	93.57
Lemont(before inoculation)2	46238324	41606435	89.98	51.88	93.52
Lemont(before inoculation)3	49717592	44830931	90.17	52.05	93.43
Lemont(24hpi)1	44337078	41569669	93.76	52.01	93.52
Lemont(24hpi)2	41278076	38242175	92.65	51.98	94.11
Lemont(24hpi)3	46568930	43232982	92.84	52.37	93.63
Lemont(48hpi)1	39907826	14542115	36.44	53.11	93.56
Lemont(48hpi)2	39617554	32523806	82.09	52.95	93.18
Lemont(48hpi)3	45062118	35379500	78.51	52.95	93.68
GD66(before inoculation)1	40515632	36421348	89.89	52.36	93.49
GD66(before inoculation)2	48344688	43966415	90.94	52.13	93.59
GD66(before inoculation)3	40299526	36764071	91.23	52.11	93.62
GD66(24hpi)1	55287752	42110087	76.17	52.45	93.82
GD66(24hpi)2	40252466	36179934	89.88	52.39	93.43
GD66(24hpi)3	42230642	31289531	74.09	53.01	93.55
GD66(48hpi)1	39369840	35878946	91.13	52.46	93.28
GD66(48hpi)2	44075546	29361055	66.62	52.84	93.6
GD66(48hpi)3	40245014	35639463	88.56	52.33	93.29
Average	44355838	37244900	83.74	52.4	93.55
a: hpi, hour post-inoculation; three replicates for each sample.
b: the percentage of bases with a Phred value greater than 30 in the raw bases as a percentage of the total base.

## Sheet: S3
Table S3 Number of genes differentially expressed after inoculation with Rhizoctonia solani
Comparison	Up-regulated	Down-regulated	Total DEGs
Lemont-0 h .VS. Lemont-24 h	3244	2990	6234
Lemont-0 h .VS. Lemont-48 h	2042	481	2523
Lemont-24 h .VS. Lemont-48 h	450	195	645
GD66-0 h .VS. GD66-24 h	4177	3607	7784
GD66-0 h .VS. GD66-48 h	2218	501	2719
GD66-24 h .VS. GD66-48 h	24	12	36
Lemont-0 h .VS. GD66-0 h	1512	2425	3937
Lemont-24 h .VS. GD66-24 h	1913	2108	4021
Lemont-48 h .VS. GD66-48 h	735	1113	1848

## Sheet: S4
Table S4 Kyoto Encyclopedia of Genes and Genomes (KEGG) pathways of the differentially expressed genes
ID	Description	Gene Ratio	Bg Ratio	Enrich_factor	p value	q value	Gene ID	Count
ko04626	Plant-pathogen interaction	296/1764	1421/14082	1.66	7.56268e-21	7.32386e-19	LOC_Os01g02290/LOC_Os01g02310/LOC_Os01g02350/LOC_Os01g02360/LOC_Os01g02400/LOC_Os01g02430/LOC_Os01g02550/LOC_Os01g02570/LOC_Os01g02690/LOC_Os01g02730/LOC_Os01g02750/LOC_Os01g02770/LOC_Os01g02780/LOC_Os01g02800/LOC_Os01g02830/LOC_Os01g02840/LOC_Os01g06790/LOC_Os01g06920/LOC_Os01g07280/LOC_Os01g08710/LOC_Os01g09080/LOC_Os01g09100/LOC_Os01g10700/LOC_Os01g10710/LOC_Os01g10900/LOC_Os01g12290/LOC_Os01g…	296
ko04075	Plant hormone signal transduction	142/1764	899/14082	1.26	0.00171482	0.0110711	LOC_Os01g02350/LOC_Os01g02400/LOC_Os01g02570/LOC_Os01g02730/LOC_Os01g02800/LOC_Os01g02830/LOC_Os01g02840/LOC_Os01g09450/LOC_Os01g09990/LOC_Os01g10700/LOC_Os01g10710/LOC_Os01g12290/LOC_Os01g12400/LOC_Os01g12790/LOC_Os01g13030/LOC_Os01g13520/LOC_Os01g28450/LOC_Os01g28500/LOC_Os01g42330/LOC_Os01g45520/LOC_Os01g48060/LOC_Os01g49920/LOC_Os01g55940/LOC_Os01g62760/LOC_Os01g63770/LOC_Os01g65060/LOC_Os01g…	142
ko04016	MAPK signaling pathway - plant	130/1764	621/14082	1.67	1.18321e-09	3.81949e-08	LOC_Os01g02350/LOC_Os01g02400/LOC_Os01g02570/LOC_Os01g02730/LOC_Os01g02800/LOC_Os01g02830/LOC_Os01g02840/LOC_Os01g08710/LOC_Os01g09080/LOC_Os01g09540/LOC_Os01g09990/LOC_Os01g10700/LOC_Os01g10710/LOC_Os01g12290/LOC_Os01g12400/LOC_Os01g18400/LOC_Os01g18584/LOC_Os01g28450/LOC_Os01g28500/LOC_Os01g40430/LOC_Os01g45520/LOC_Os01g48040/LOC_Os01g61080/LOC_Os01g62760/LOC_Os01g65060/LOC_Os01g66250/LOC_Os01g…	130
ko00500	Starch and sucrose metabolism	106/1764	465/14082	1.82	3.1484e-10	1.52449e-08	LOC_Os01g04200/LOC_Os01g09460/LOC_Os01g32364/LOC_Os01g38190/LOC_Os01g44090/LOC_Os01g51754/LOC_Os01g52250/LOC_Os01g52450/LOC_Os01g54560/LOC_Os01g59840/LOC_Os01g71380/LOC_Os01g71410/LOC_Os01g71810/LOC_Os01g71820/LOC_Os01g71830/LOC_Os01g71930/LOC_Os02g19530/LOC_Os02g19550/LOC_Os02g32660/LOC_Os02g48200/LOC_Os02g48210/LOC_Os02g50490/LOC_Os02g51070/LOC_Os02g53200/LOC_Os02g54820/LOC_Os03g22790/LOC_Os03g…	106
ko00940	Phenylpropanoid biosynthesis	79/1764	411/14082	1.53	5.69869e-05	0.00078839	LOC_Os01g16450/LOC_Os01g18120/LOC_Os01g32364/LOC_Os01g40870/LOC_Os01g41430/LOC_Os01g45140/LOC_Os01g49380/LOC_Os01g57730/LOC_Os01g59840/LOC_Os01g67530/LOC_Os01g67540/LOC_Os01g73200/LOC_Os01g74660/LOC_Os02g11720/LOC_Os02g14430/LOC_Os02g26770/LOC_Os02g26810/LOC_Os02g39850/LOC_Os02g41670/LOC_Os03g13180/LOC_Os03g49600/LOC_Os03g53800/LOC_Os03g53860/LOC_Os03g55410/LOC_Os03g60380/LOC_Os04g39100/LOC_Os04g…	79
ko01200	Carbon metabolism	73/1764	379/14082	1.54	0.00010056	0.000973849	LOC_Os01g02020/LOC_Os01g02050/LOC_Os01g04200/LOC_Os01g09460/LOC_Os01g16900/LOC_Os01g39270/LOC_Os01g47080/LOC_Os01g48990/LOC_Os01g52450/LOC_Os01g53680/LOC_Os01g62420/LOC_Os01g74510/LOC_Os02g02400/LOC_Os02g02970/LOC_Os02g03540/LOC_Os02g05830/LOC_Os02g10070/LOC_Os02g14110/LOC_Os02g43470/LOC_Os03g08999/LOC_Os03g09020/LOC_Os03g15050/LOC_Os03g19250/LOC_Os03g31750/LOC_Os03g58040/LOC_Os04g01600/LOC_Os04g…	73
ko00520	Amino sugar and nucleotide sugar metabolism	56/1764	343/14082	1.3	0.0220266	0.0627384	LOC_Os01g03710/LOC_Os01g04200/LOC_Os01g09460/LOC_Os01g18400/LOC_Os01g47070/LOC_Os01g52450/LOC_Os01g57540/LOC_Os01g59930/LOC_Os01g64100/LOC_Os02g12130/LOC_Os02g29530/LOC_Os02g39330/LOC_Os03g04060/LOC_Os03g13690/LOC_Os03g59190/LOC_Os04g41620/LOC_Os04g52730/LOC_Os04g53040/LOC_Os05g06500/LOC_Os05g09500/LOC_Os05g15770/LOC_Os05g15880/LOC_Os05g33130/LOC_Os05g34320/LOC_Os05g50380/LOC_Os06g08620/LOC_Os06g…	56
ko00904	Diterpenoid biosynthesis	48/1764	171/14082	2.24	3.56773e-08	8.63766e-07	LOC_Os01g55240/LOC_Os02g17760/LOC_Os02g36020/LOC_Os02g36030/LOC_Os02g36070/LOC_Os02g36110/LOC_Os02g36140/LOC_Os02g36150/LOC_Os02g36190/LOC_Os02g36210/LOC_Os02g36220/LOC_Os02g36264/LOC_Os02g36280/LOC_Os03g44740/LOC_Os03g63970/LOC_Os04g09900/LOC_Os04g09920/LOC_Os04g10000/LOC_Os04g10010/LOC_Os04g10060/LOC_Os04g10160/LOC_Os05g43880/LOC_Os06g30640/LOC_Os06g37224/LOC_Os06g37300/LOC_Os06g39780/LOC_Os06g…	48
ko01230	Biosynthesis of amino acids	48/1764	350/14082	1.09	0.270809	0.422995	LOC_Os01g16900/LOC_Os01g27770/LOC_Os01g47080/LOC_Os01g53680/LOC_Os01g62420/LOC_Os01g65090/LOC_Os02g03540/LOC_Os02g05780/LOC_Os02g10070/LOC_Os02g14110/LOC_Os02g16630/LOC_Os02g51410/LOC_Os03g01600/LOC_Os03g03450/LOC_Os03g15780/LOC_Os03g18130/LOC_Os03g20850/LOC_Os03g31690/LOC_Os03g63330/LOC_Os04g38950/LOC_Os04g54800/LOC_Os05g33380/LOC_Os05g41640/LOC_Os05g48200/LOC_Os06g04510/LOC_Os06g07860/LOC_Os06g…	48
ko02010	ABC transporters	46/1764	1218/14082	0.3	1	0.733652	LOC_Os01g18670/LOC_Os01g24010/LOC_Os01g24980/LOC_Os01g25010/LOC_Os01g42370/LOC_Os01g42380/LOC_Os01g50160/LOC_Os02g11960/LOC_Os02g21340/LOC_Os02g32690/LOC_Os02g46680/LOC_Os02g57930/LOC_Os03g17370/LOC_Os03g23770/LOC_Os03g61370/LOC_Os03g64200/LOC_Os04g07730/LOC_Os04g13210/LOC_Os04g13950/LOC_Os05g17900/LOC_Os05g20490/LOC_Os06g08560/LOC_Os06g36090/LOC_Os06g38950/LOC_Os07g16360/LOC_Os07g17920/LOC_Os07g…	46
ko00010	Glycolysis / Gluconeogenesis	45/1764	204/14082	1.76	9.3073e-05	0.000973849	LOC_Os01g04200/LOC_Os01g06660/LOC_Os01g09460/LOC_Os01g47080/LOC_Os01g52450/LOC_Os01g53680/LOC_Os01g62420/LOC_Os01g74510/LOC_Os02g08030/LOC_Os02g43194/LOC_Os02g49720/LOC_Os03g08999/LOC_Os03g09020/LOC_Os03g15050/LOC_Os03g19250/LOC_Os03g31750/LOC_Os04g38540/LOC_Os05g06460/LOC_Os05g09500/LOC_Os05g33380/LOC_Os05g33570/LOC_Os05g39000/LOC_Os05g39320/LOC_Os05g41640/LOC_Os05g49430/LOC_Os06g01630/LOC_Os06g…	45
ko03010	Ribosome	44/1764	397/14082	0.88	0.830762	0.733652	LOC_Os01g25610/LOC_Os01g41030/LOC_Os01g59730/LOC_Os02g27769/LOC_Os02g32970/LOC_Os02g51790/LOC_Os03g22340/LOC_Os03g37970/LOC_Os03g54860/LOC_Os03g61260/LOC_Os03g62780/LOC_Os04g16818/LOC_Os04g25540/LOC_Os04g33590/LOC_Os04g50990/LOC_Os04g52361/LOC_Os05g34260/LOC_Os06g34780/LOC_Os06g35730/LOC_Os06g46930/LOC_Os06g51530/LOC_Os07g07719/LOC_Os07g07770/LOC_Os07g10660/LOC_Os07g23244/LOC_Os07g33860/LOC_Os07g…	44
ko03040	Spliceosome	43/1764	381/14082	0.9	0.792198	0.733652	LOC_Os01g02280/LOC_Os01g02790/LOC_Os01g12430/LOC_Os01g43650/LOC_Os01g47750/LOC_Os01g48930/LOC_Os01g53260/LOC_Os01g62290/LOC_Os01g68470/LOC_Os01g73604/LOC_Os02g01880/LOC_Os02g04950/LOC_Os02g05410/LOC_Os02g08090/LOC_Os02g13965/LOC_Os02g16270/LOC_Os02g16640/LOC_Os02g26349/LOC_Os02g51890/LOC_Os03g49430/LOC_Os03g59550/LOC_Os04g23600/LOC_Os04g31950/LOC_Os05g01280/LOC_Os05g01290/LOC_Os05g07080/LOC_Os05g…	43
ko00941	Flavonoid biosynthesis	41/1764	160/14082	2.05	4.52441e-06	8.63112e-05	LOC_Os01g53370/LOC_Os01g53420/LOC_Os01g53430/LOC_Os01g61610/LOC_Os01g64910/LOC_Os02g26770/LOC_Os02g26810/LOC_Os02g39850/LOC_Os03g25150/LOC_Os03g62480/LOC_Os04g01140/LOC_Os04g01354/LOC_Os04g01470/LOC_Os04g09604/LOC_Os04g42250/LOC_Os04g51990/LOC_Os04g52190/LOC_Os04g56700/LOC_Os04g56900/LOC_Os04g56910/LOC_Os05g45100/LOC_Os05g45110/LOC_Os06g08610/LOC_Os07g32060/LOC_Os07g32630/LOC_Os07g40690/LOC_Os07g…	41
ko00480	Glutathione metabolism	41/1764	161/14082	2.03	5.34754e-06	8.63112e-05	LOC_Os01g05810/LOC_Os01g25100/LOC_Os01g27340/LOC_Os01g27360/LOC_Os01g27390/LOC_Os01g27480/LOC_Os01g37750/LOC_Os01g49710/LOC_Os01g72130/LOC_Os01g72170/LOC_Os01g73514/LOC_Os02g26700/LOC_Os02g34810/LOC_Os02g43550/LOC_Os02g44500/LOC_Os02g56850/LOC_Os03g04260/LOC_Os03g57200/LOC_Os04g37580/LOC_Os05g02530/LOC_Os05g03820/LOC_Os06g08670/LOC_Os06g14620/LOC_Os07g07320/LOC_Os07g28480/LOC_Os09g29200/LOC_Os10g…	41
ko00195	Photosynthesis	39/1764	189/14082	1.65	0.00105487	0.00785813	LOC_Os01g57942/LOC_Os01g57945/LOC_Os01g59090/LOC_Os01g64120/LOC_Os01g64960/LOC_Os01g71190/LOC_Os02g24632/LOC_Os02g24634/LOC_Os02g24642/LOC_Os02g36850/LOC_Os03g55874/LOC_Os03g56670/LOC_Os03g61960/LOC_Os04g16770/LOC_Os04g16844/LOC_Os04g16866/LOC_Os04g16872/LOC_Os04g16874/LOC_Os04g33830/LOC_Os05g01675/LOC_Os05g08010/LOC_Os05g43310/LOC_Os06g01850/LOC_Os06g39708/LOC_Os06g46436/LOC_Os07g04840/LOC_Os07g…	39
ko04144	Endocytosis	38/1764	325/14082	0.93	0.701956	0.733652	LOC_Os01g01340/LOC_Os01g02790/LOC_Os01g12430/LOC_Os01g62290/LOC_Os01g68470/LOC_Os01g70260/LOC_Os02g13965/LOC_Os02g58170/LOC_Os03g01920/LOC_Os03g15230/LOC_Os03g41675/LOC_Os03g52230/LOC_Os04g14990/LOC_Os04g23600/LOC_Os04g47420/LOC_Os05g07080/LOC_Os05g07880/LOC_Os05g12410/LOC_Os05g44070/LOC_Os06g29630/LOC_Os06g47330/LOC_Os07g15680/LOC_Os07g28910/LOC_Os07g31070/LOC_Os07g34830/LOC_Os07g44040/LOC_Os08g…	38
ko00052	Galactose metabolism	37/1764	179/14082	1.65	0.00135285	0.00935809	LOC_Os01g09460/LOC_Os01g38190/LOC_Os01g52450/LOC_Os01g53680/LOC_Os01g70870/LOC_Os02g31890/LOC_Os03g15020/LOC_Os03g20120/LOC_Os03g59190/LOC_Os03g59430/LOC_Os04g38540/LOC_Os04g45290/LOC_Os04g53040/LOC_Os04g56930/LOC_Os05g08890/LOC_Os05g09500/LOC_Os06g07600/LOC_Os06g46340/LOC_Os07g09890/LOC_Os07g10840/LOC_Os07g31690/LOC_Os07g48830/LOC_Os08g29560/LOC_Os08g30520/LOC_Os08g38710/LOC_Os09g08072/LOC_Os09g…	37
ko03020	RNA polymerase	36/1764	737/14082	0.39	1	0.733652	LOC_Os01g03830/LOC_Os01g26240/LOC_Os01g50090/LOC_Os01g70540/LOC_Os02g20200/LOC_Os03g13260/LOC_Os03g21050/LOC_Os03g37650/LOC_Os03g46450/LOC_Os03g62870/LOC_Os03g63124/LOC_Os04g35870/LOC_Os04g41040/LOC_Os04g49910/LOC_Os04g57570/LOC_Os05g05860/LOC_Os05g31210/LOC_Os06g05680/LOC_Os06g35780/LOC_Os06g41340/LOC_Os07g23480/LOC_Os07g29460/LOC_Os07g34410/LOC_Os07g36270/LOC_Os07g41380/LOC_Os08g03880/LOC_Os08g…	36
ko04141	Protein processing in endoplasmic reticulum	33/1764	422/14082	0.62	0.999356	0.733652	LOC_Os01g02790/LOC_Os01g08860/LOC_Os01g12430/LOC_Os01g27160/LOC_Os01g62290/LOC_Os01g68470/LOC_Os01g73280/LOC_Os02g13965/LOC_Os02g35820/LOC_Os03g03920/LOC_Os03g16020/LOC_Os03g18910/LOC_Os03g40400/LOC_Os03g58570/LOC_Os04g23600/LOC_Os04g33690/LOC_Os04g51410/LOC_Os05g07080/LOC_Os05g26040/LOC_Os06g29630/LOC_Os06g49920/LOC_Os07g33350/LOC_Os07g43240/LOC_Os08g30590/LOC_Os08g33340/LOC_Os09g10054/LOC_Os09g…	33
ko00460	Cyanoamino acid metabolism	32/1764	176/14082	1.45	0.0187152	0.0601894	LOC_Os01g05810/LOC_Os01g25360/LOC_Os01g32364/LOC_Os01g37650/LOC_Os01g59840/LOC_Os01g70830/LOC_Os01g70840/LOC_Os01g70850/LOC_Os02g28900/LOC_Os02g42330/LOC_Os03g41180/LOC_Os03g49600/LOC_Os03g53800/LOC_Os03g53860/LOC_Os03g55050/LOC_Os03g63310/LOC_Os04g08824/LOC_Os04g08828/LOC_Os04g08836/LOC_Os04g39814/LOC_Os04g43410/LOC_Os05g01380/LOC_Os05g30350/LOC_Os06g44540/LOC_Os06g46940/LOC_Os07g06500/LOC_Os07g…	32
ko04120	Ubiquitin mediated proteolysis	32/1764	288/14082	0.89	0.792845	0.733652	LOC_Os01g03180/LOC_Os01g27160/LOC_Os01g48640/LOC_Os01g62810/LOC_Os02g12410/LOC_Os02g45980/LOC_Os02g47180/LOC_Os02g50460/LOC_Os03g13740/LOC_Os03g22680/LOC_Os03g24040/LOC_Os04g34030/LOC_Os04g35680/LOC_Os04g49500/LOC_Os04g58920/LOC_Os05g39930/LOC_Os05g48390/LOC_Os05g50360/LOC_Os06g13870/LOC_Os07g39250/LOC_Os07g43240/LOC_Os08g08700/LOC_Os08g13780/LOC_Os09g10054/LOC_Os09g31031/LOC_Os10g31850/LOC_Os10g…	32
ko03440	Homologous recombination	30/1764	163/14082	1.47	0.0190446	0.0601894	LOC_Os01g43990/LOC_Os01g44020/LOC_Os01g73070/LOC_Os03g06900/LOC_Os03g08400/LOC_Os03g14050/LOC_Os03g19190/LOC_Os03g45960/LOC_Os03g46060/LOC_Os03g46070/LOC_Os03g63870/LOC_Os04g51490/LOC_Os05g03050/LOC_Os05g15520/LOC_Os06g22380/LOC_Os07g04730/LOC_Os07g25390/LOC_Os08g14610/LOC_Os09g36580/LOC_Os09g37920/LOC_Os10g10750/LOC_Os10g11590/LOC_Os11g08660/LOC_Os11g40150/LOC_Os12g27370/LOC_Os12g35465/LOC_Os12g…	30
ko00564	Glycerophospholipid metabolism	30/1764	211/14082	1.14	0.255296	0.412056	LOC_Os01g08760/LOC_Os01g44069/LOC_Os01g46370/LOC_Os01g49820/LOC_Os01g50030/LOC_Os01g57420/LOC_Os01g58740/LOC_Os01g67430/LOC_Os02g02340/LOC_Os02g37800/LOC_Os02g58270/LOC_Os03g52010/LOC_Os04g51280/LOC_Os04g57380/LOC_Os05g07880/LOC_Os05g32380/LOC_Os05g51050/LOC_Os06g29650/LOC_Os07g15680/LOC_Os07g47400/LOC_Os08g04450/LOC_Os08g04800/LOC_Os08g12830/LOC_Os08g39350/LOC_Os08g42390/LOC_Os09g37100/LOC_Os10g…	30
ko03013	RNA transport	30/1764	570/14082	0.42	1	0.733652	LOC_Os01g56270/LOC_Os01g74490/LOC_Os02g10794/LOC_Os02g14520/LOC_Os02g19770/LOC_Os02g32814/LOC_Os02g34130/LOC_Os03g18350/LOC_Os03g27930/LOC_Os03g59550/LOC_Os04g22870/LOC_Os04g49780/LOC_Os05g01450/LOC_Os05g49470/LOC_Os05g50750/LOC_Os06g48750/LOC_Os08g10740/LOC_Os09g17920/LOC_Os10g25000/LOC_Os11g31430/LOC_Os11g31470/LOC_Os11g31770/LOC_Os12g01010/LOC_Os12g12990/LOC_Os12g27780/LOC_Os12g43380/LOC_Os12g…	30
ko00630	Glyoxylate and dicarboxylate metabolism	29/1764	137/14082	1.69	0.00294839	0.0167958	LOC_Os01g02020/LOC_Os01g39270/LOC_Os01g48990/LOC_Os02g02400/LOC_Os02g02970/LOC_Os02g05830/LOC_Os02g10070/LOC_Os03g19250/LOC_Os04g01600/LOC_Os04g53230/LOC_Os05g06460/LOC_Os06g29220/LOC_Os07g03820/LOC_Os07g03870/LOC_Os07g03920/LOC_Os07g03930/LOC_Os07g04010/LOC_Os07g40660/LOC_Os08g33720/LOC_Os08g34570/LOC_Os08g43230/LOC_Os09g08660/LOC_Os10g21268/LOC_Os10g37180/LOC_Os10g38900/LOC_Os12g08760/LOC_Os12g…	29
ko00270	Cysteine and methionine metabolism	28/1764	184/14082	1.21	0.158891	0.290328	LOC_Os01g39860/LOC_Os02g14110/LOC_Os02g19924/LOC_Os02g19970/LOC_Os03g01600/LOC_Os03g12110/LOC_Os03g15110/LOC_Os03g20850/LOC_Os03g46230/LOC_Os03g63330/LOC_Os04g42090/LOC_Os04g48850/LOC_Os05g03820/LOC_Os05g05670/LOC_Os05g39770/LOC_Os06g07860/LOC_Os06g23684/LOC_Os08g19480/LOC_Os08g33720/LOC_Os08g34020/LOC_Os08g34720/LOC_Os09g25620/LOC_Os09g27750/LOC_Os09g27820/LOC_Os10g28350/LOC_Os10g40200/LOC_Os11g…	28
ko00040	Pentose and glucuronate interconversions	25/1764	230/14082	0.87	0.80513	0.733652	LOC_Os01g19170/LOC_Os01g43160/LOC_Os02g43850/LOC_Os03g28090/LOC_Os03g51670/LOC_Os03g58620/LOC_Os03g59190/LOC_Os04g05050/LOC_Os04g06850/LOC_Os04g07110/LOC_Os04g08190/LOC_Os04g53040/LOC_Os05g29790/LOC_Os06g49000/LOC_Os06g49760/LOC_Os07g14160/LOC_Os07g26560/LOC_Os07g31690/LOC_Os08g29560/LOC_Os08g34910/LOC_Os09g19810/LOC_Os09g31270/LOC_Os10g35980/LOC_Os11g43750/Oryza_sativa_newGene_597	25
ko00561	Glycerolipid metabolism	23/1764	158/14082	1.16	0.250996	0.411984	LOC_Os01g21520/LOC_Os01g44069/LOC_Os01g48990/LOC_Os01g49820/LOC_Os01g57420/LOC_Os02g02340/LOC_Os02g19950/LOC_Os02g43194/LOC_Os02g49720/LOC_Os02g50690/LOC_Os02g58270/LOC_Os04g51280/LOC_Os06g50950/LOC_Os08g04450/LOC_Os10g35070/LOC_Os10g35110/LOC_Os10g35330/LOC_Os11g01040/LOC_Os11g43900/LOC_Os11g45400/LOC_Os12g07810/LOC_Os12g37600/LOC_Os12g37910	23
ko00380	Tryptophan metabolism	23/1764	227/14082	0.81	0.887394	0.733652	LOC_Os01g02020/LOC_Os01g02500/LOC_Os01g56380/LOC_Os02g02400/LOC_Os02g43194/LOC_Os02g49720/LOC_Os03g57680/LOC_Os04g10530/LOC_Os04g14690/LOC_Os04g14710/LOC_Os04g39980/LOC_Os05g06460/LOC_Os05g25600/LOC_Os06g16030/LOC_Os06g16960/LOC_Os08g04540/LOC_Os08g04560/LOC_Os08g43230/LOC_Os10g04860/LOC_Os10g23900/LOC_Os11g33090/LOC_Os11g43900/LOC_Os12g07810	23
ko01212	Fatty acid metabolism	22/1764	111/14082	1.58	0.0187248	0.0601894	LOC_Os01g02020/LOC_Os01g31494/LOC_Os01g65830/LOC_Os02g43090/LOC_Os02g48560/LOC_Os04g39780/LOC_Os05g04170/LOC_Os06g06350/LOC_Os06g19530/LOC_Os06g19590/LOC_Os06g23760/LOC_Os06g23780/LOC_Os07g23410/LOC_Os07g23430/LOC_Os08g10010/LOC_Os09g10600/LOC_Os09g33740/LOC_Os10g31780/LOC_Os11g01154/LOC_Os11g06590/LOC_Os11g39220/LOC_Os12g01160	22
ko00330	Arginine and proline metabolism	22/1764	114/14082	1.54	0.0248999	0.0688959	LOC_Os01g02500/LOC_Os01g07920/LOC_Os02g14110/LOC_Os02g43194/LOC_Os02g49720/LOC_Os03g55380/LOC_Os03g58890/LOC_Os04g10530/LOC_Os04g42090/LOC_Os04g54560/LOC_Os04g57560/LOC_Os05g41010/LOC_Os05g43830/LOC_Os06g04070/LOC_Os06g16030/LOC_Os09g20260/LOC_Os09g20284/LOC_Os09g25620/LOC_Os10g40360/LOC_Os11g33090/LOC_Os11g43900/LOC_Os12g07810	22
ko00190	Oxidative phosphorylation	22/1764	213/14082	0.82	0.861365	0.733652	LOC_Os01g22900/LOC_Os01g58010/LOC_Os02g03320/LOC_Os02g47320/LOC_Os03g14690/LOC_Os03g39860/LOC_Os03g55874/LOC_Os03g63930/LOC_Os05g02310/LOC_Os05g36260/LOC_Os06g46435/LOC_Os06g49450/LOC_Os07g02580/LOC_Os07g32880/LOC_Os08g14860/LOC_Os09g36860/LOC_Os10g38206/LOC_Os10g38272/LOC_Os12g10570/LOC_Os12g19420/LOC_Os12g34890/Oryza_sativa_newGene_5261	22
ko00230	Purine metabolism	22/1764	300/14082	0.59	0.998749	0.733652	LOC_Os01g47080/LOC_Os02g03540/LOC_Os02g05550/LOC_Os02g13910/LOC_Os02g40010/LOC_Os02g47430/LOC_Os04g18770/LOC_Os04g58390/LOC_Os06g14620/LOC_Os06g22560/LOC_Os06g28530/LOC_Os06g41360/LOC_Os07g42160/LOC_Os07g46630/LOC_Os08g39760/LOC_Os09g22410/LOC_Os11g10980/LOC_Os11g25330/LOC_Os12g08000/LOC_Os12g13380/LOC_Os12g28270/LOC_Os12g39860	22
ko00710	Carbon fixation in photosynthetic organisms	21/1764	103/14082	1.63	0.0157461	0.0601894	LOC_Os01g02050/LOC_Os01g62420/LOC_Os01g74510/LOC_Os02g05830/LOC_Os02g14110/LOC_Os03g15050/LOC_Os03g31750/LOC_Os05g09440/LOC_Os05g33380/LOC_Os05g33570/LOC_Os05g39000/LOC_Os05g41640/LOC_Os08g33720/LOC_Os09g36450/LOC_Os10g13700/LOC_Os10g21268/LOC_Os10g25130/LOC_Os10g30560/LOC_Os12g10580/LOC_Os12g17600/LOC_Os12g19470	21
ko00620	Pyruvate metabolism	21/1764	118/14082	1.42	0.0601182	0.135395	LOC_Os01g02020/LOC_Os01g02050/LOC_Os01g47080/LOC_Os02g43194/LOC_Os02g49720/LOC_Os03g15050/LOC_Os03g19250/LOC_Os03g31750/LOC_Os05g06460/LOC_Os05g09440/LOC_Os05g33570/LOC_Os06g01630/LOC_Os07g06890/LOC_Os08g33440/LOC_Os08g33720/LOC_Os09g22410/LOC_Os10g13700/LOC_Os11g10980/LOC_Os11g43900/LOC_Os12g07810/LOC_Os12g08170	21
ko00562	Inositol phosphate metabolism	21/1764	164/14082	1.02	0.492507	0.596192	LOC_Os01g08780/LOC_Os01g62420/LOC_Os01g62670/LOC_Os03g06460/LOC_Os03g13520/LOC_Os03g18010/LOC_Os06g29650/LOC_Os06g35060/LOC_Os06g36560/LOC_Os07g09060/LOC_Os07g23930/LOC_Os07g31070/LOC_Os07g34830/LOC_Os08g01390/LOC_Os08g10480/LOC_Os09g14870/LOC_Os09g36450/LOC_Os11g04900/LOC_Os11g14570/LOC_Os11g20384/LOC_Os12g08280	21
ko00071	Fatty acid degradation	20/1764	68/14082	2.35	0.000169618	0.00149329	LOC_Os01g02020/LOC_Os01g31494/LOC_Os02g43194/LOC_Os02g49720/LOC_Os03g08999/LOC_Os03g09020/LOC_Os05g04170/LOC_Os06g03930/LOC_Os06g06350/LOC_Os06g23760/LOC_Os06g23780/LOC_Os07g42924/LOC_Os09g33740/LOC_Os10g38090/LOC_Os10g38120/LOC_Os11g10510/LOC_Os11g10520/LOC_Os11g39220/LOC_Os11g43900/LOC_Os12g07810	20
ko00400	Phenylalanine, tyrosine and tryptophan biosynthesis	20/1764	76/14082	2.1	0.000839836	0.00677763	LOC_Os01g27770/LOC_Os01g65090/LOC_Os02g14110/LOC_Os02g16630/LOC_Os02g19924/LOC_Os02g19970/LOC_Os02g51410/LOC_Os03g03450/LOC_Os03g15780/LOC_Os04g38950/LOC_Os04g54800/LOC_Os06g12150/LOC_Os06g23684/LOC_Os07g08430/LOC_Os08g04180/LOC_Os08g23150/LOC_Os08g37790/LOC_Os09g36800/LOC_Os09g39260/LOC_Os11g42510	20
ko03030	DNA replication	20/1764	108/14082	1.48	0.0461222	0.114527	LOC_Os01g43990/LOC_Os01g44020/LOC_Os01g73070/LOC_Os02g47605/LOC_Os03g08400/LOC_Os03g63870/LOC_Os04g48060/LOC_Os04g51490/LOC_Os05g15520/LOC_Os06g22380/LOC_Os08g02670/LOC_Os08g36330/LOC_Os09g39490/LOC_Os10g10750/LOC_Os10g11590/LOC_Os11g05570/LOC_Os11g29380/LOC_Os12g27370/LOC_Os12g35465/Oryza_sativa_newGene_1451	20
ko00592	alpha-Linolenic acid metabolism	20/1764	110/14082	1.45	0.0543153	0.128293	ChrUn.fgenesh.gene.96/LOC_Os01g27230/LOC_Os01g27240/LOC_Os01g31494/LOC_Os01g46370/LOC_Os01g50610/LOC_Os01g67430/LOC_Os02g10120/LOC_Os04g30420/LOC_Os05g32380/LOC_Os06g11200/LOC_Os06g23760/LOC_Os06g23780/LOC_Os08g04800/LOC_Os09g32570/LOC_Os11g10510/LOC_Os11g10520/LOC_Os11g39220/LOC_Os12g37260/LOC_Os12g37350	20
ko00053	Ascorbate and aldarate metabolism	20/1764	119/14082	1.34	0.10376	0.200967	LOC_Os01g67520/LOC_Os02g34810/LOC_Os02g43194/LOC_Os02g49720/LOC_Os03g59190/LOC_Os04g53040/LOC_Os05g02530/LOC_Os06g36560/LOC_Os07g26000/LOC_Os07g31690/LOC_Os08g02230/LOC_Os08g29560/LOC_Os09g19810/LOC_Os09g20090/LOC_Os10g03620/LOC_Os10g03730/LOC_Os11g43900/LOC_Os12g07810/LOC_Os12g07830/Oryza_sativa_newGene_597	20
ko03420	Nucleotide excision repair	20/1764	130/14082	1.23	0.193426	0.33761	LOC_Os01g43990/LOC_Os01g44020/LOC_Os01g73070/LOC_Os02g47605/LOC_Os03g08400/LOC_Os03g63870/LOC_Os04g48060/LOC_Os04g51410/LOC_Os04g51490/LOC_Os05g15520/LOC_Os06g22380/LOC_Os08g02670/LOC_Os08g33340/LOC_Os08g36330/LOC_Os09g39490/LOC_Os10g10750/LOC_Os10g11590/LOC_Os12g27370/LOC_Os12g35465/Oryza_sativa_newGene_1451	20
ko04146	Peroxisome	20/1764	147/14082	1.09	0.382011	0.518839	LOC_Os01g31494/LOC_Os01g32080/LOC_Os02g02400/LOC_Os02g03070/LOC_Os02g19650/LOC_Os03g56740/LOC_Os05g04170/LOC_Os05g11870/LOC_Os05g46460/LOC_Os06g06350/LOC_Os06g23760/LOC_Os06g23780/LOC_Os07g23340/LOC_Os07g23380/LOC_Os08g43230/LOC_Os08g44360/LOC_Os09g14600/LOC_Os09g33740/LOC_Os11g39220/LOC_Os12g35890	20
ko04070	Phosphatidylinositol signaling system	20/1764	174/14082	0.92	0.694431	0.733652	LOC_Os01g08780/LOC_Os01g56980/LOC_Os01g57420/LOC_Os01g62670/LOC_Os01g72710/LOC_Os02g58270/LOC_Os03g13520/LOC_Os03g18010/LOC_Os06g29650/LOC_Os06g35060/LOC_Os07g31070/LOC_Os07g34830/LOC_Os07g42730/LOC_Os08g01390/LOC_Os08g10480/LOC_Os09g14870/LOC_Os11g04900/LOC_Os11g14570/LOC_Os11g20384/LOC_Os12g08280	20
ko00600	Sphingolipid metabolism	20/1764	241/14082	0.66	0.985978	0.733652	LOC_Os01g39050/LOC_Os01g45290/LOC_Os01g70870/LOC_Os02g17292/LOC_Os02g20630/LOC_Os02g31890/LOC_Os03g15020/LOC_Os04g18570/LOC_Os04g32770/LOC_Os04g33060/LOC_Os05g06610/LOC_Os07g05440/LOC_Os09g04960/LOC_Os09g07640/LOC_Os09g15250/LOC_Os09g36810/LOC_Os10g35070/LOC_Os10g35110/LOC_Os10g35330/LOC_Os11g13810	20
ko03430	Mismatch repair	19/1764	93/14082	1.63	0.0204943	0.0620224	LOC_Os01g08540/LOC_Os01g43990/LOC_Os01g44020/LOC_Os01g73070/LOC_Os02g47605/LOC_Os03g08400/LOC_Os03g63870/LOC_Os04g48060/LOC_Os04g51490/LOC_Os05g15520/LOC_Os06g22380/LOC_Os08g02670/LOC_Os09g24220/LOC_Os09g32360/LOC_Os10g10750/LOC_Os10g11590/LOC_Os12g27370/LOC_Os12g35465/Oryza_sativa_newGene_1451	19
ko00260	Glycine, serine and threonine metabolism	19/1764	113/14082	1.34	0.110248	0.209347	LOC_Os01g48990/LOC_Os02g02970/LOC_Os03g63330/LOC_Os04g01600/LOC_Os04g53230/LOC_Os05g06460/LOC_Os05g39770/LOC_Os06g23114/LOC_Os07g08430/LOC_Os07g40660/LOC_Os08g04180/LOC_Os08g34570/LOC_Os08g34720/LOC_Os10g37180/LOC_Os10g38050/LOC_Os10g38900/LOC_Os11g04320/LOC_Os12g04120/LOC_Os12g35890	19
ko00051	Fructose and mannose metabolism	18/1764	103/14082	1.4	0.088874	0.187103	LOC_Os01g03710/LOC_Os01g09460/LOC_Os01g52450/LOC_Os01g53680/LOC_Os01g62420/LOC_Os01g74510/LOC_Os02g43850/LOC_Os03g51670/LOC_Os03g61270/LOC_Os03g61280/LOC_Os05g06500/LOC_Os05g09500/LOC_Os05g33380/LOC_Os05g39000/LOC_Os07g09890/LOC_Os09g12650/LOC_Os09g29210/LOC_Os09g36450	18
ko00970	Aminoacyl-tRNA biosynthesis	18/1764	215/14082	0.67	0.979604	0.733652	LOC_Os01g72350/LOC_Os02g02860/LOC_Os03g02100/LOC_Os04g58400/LOC_Os05g15150/LOC_Os06g34370/LOC_Os07g15440/LOC_Os07g38770/LOC_Os07g42520/LOC_Os09g06634/LOC_Os10g03400/LOC_Os10g36210/LOC_Os10g42190/LOC_Os11g07830/LOC_Os11g14150/LOC_Os11g31520/LOC_Os12g07150/LOC_Os12g07580	18
ko00350	Tyrosine metabolism	17/1764	72/14082	1.88	0.00668468	0.0340715	LOC_Os01g56380/LOC_Os01g65090/LOC_Os02g14110/LOC_Os02g19924/LOC_Os02g19970/LOC_Os03g08999/LOC_Os03g09020/LOC_Os06g23114/LOC_Os06g23684/LOC_Os07g42924/LOC_Os08g04540/LOC_Os08g04560/LOC_Os10g23900/LOC_Os11g10510/LOC_Os11g10520/LOC_Os11g42510/LOC_Os12g01680	17
ko00130	Ubiquinone and other terpenoid-quinone biosynthesis	17/1764	81/14082	1.68	0.0214291	0.0627384	LOC_Os01g67530/LOC_Os01g67540/LOC_Os02g19924/LOC_Os02g19970/LOC_Os02g26770/LOC_Os02g26810/LOC_Os03g62260/LOC_Os04g14110/LOC_Os05g42190/LOC_Os06g23684/LOC_Os06g44620/LOC_Os08g04460/LOC_Os08g14760/LOC_Os08g29900/LOC_Os08g29910/LOC_Os10g10180/LOC_Os11g42510	17
ko00360	Phenylalanine metabolism	17/1764	84/14082	1.62	0.029766	0.0779082	LOC_Os01g02500/LOC_Os01g56380/LOC_Os01g65090/LOC_Os02g14110/LOC_Os02g19924/LOC_Os02g19970/LOC_Os02g41670/LOC_Os04g10530/LOC_Os06g16030/LOC_Os06g23114/LOC_Os06g23684/LOC_Os08g04540/LOC_Os08g04560/LOC_Os10g23900/LOC_Os11g33090/LOC_Os11g42510/LOC_Os12g01680	17
ko00073	Cutin, suberine and wax biosynthesis	17/1764	91/14082	1.49	0.0581964	0.134187	LOC_Os01g08810/LOC_Os01g48874/LOC_Os01g72270/LOC_Os02g50174/LOC_Os03g04660/LOC_Os03g12260/LOC_Os06g03930/LOC_Os06g05790/LOC_Os06g14324/LOC_Os06g44300/LOC_Os07g23340/LOC_Os07g23380/LOC_Os08g44360/LOC_Os09g19930/LOC_Os10g38090/LOC_Os10g38120/LOC_Os12g04110	17
ko04712	Circadian rhythm - plant	17/1764	128/14082	1.06	0.437461	0.557429	LOC_Os01g48290/LOC_Os02g10860/LOC_Os02g46030/LOC_Os03g42100/LOC_Os04g01354/LOC_Os06g12230/LOC_Os06g44450/LOC_Os06g51260/LOC_Os07g49460/LOC_Os08g06110/LOC_Os09g29960/LOC_Os09g33850/LOC_Os09g34950/LOC_Os09g36220/LOC_Os10g26620/LOC_Os11g05930/LOC_Os11g32650	17
ko00909	Sesquiterpenoid and triterpenoid biosynthesis	17/1764	266/14082	0.51	0.999678	0.733652	LOC_Os01g13620/LOC_Os02g50090/LOC_Os03g61910/LOC_Os04g01810/LOC_Os04g27190/LOC_Os04g27340/LOC_Os04g27400/LOC_Os04g27430/LOC_Os04g27670/LOC_Os04g27760/LOC_Os06g28820/LOC_Os07g10130/LOC_Os07g11790/LOC_Os11g08569/LOC_Os11g18194/LOC_Os11g18366/LOC_Os11g35710	17
ko00310	Lysine degradation	16/1764	64/14082	2	0.00465933	0.0250677	LOC_Os01g02020/LOC_Os01g70220/LOC_Os02g43194/LOC_Os02g49720/LOC_Os03g49730/LOC_Os04g34976/LOC_Os05g06460/LOC_Os08g30900/LOC_Os08g30910/LOC_Os08g45130/LOC_Os09g38440/LOC_Os10g36250/LOC_Os11g43900/LOC_Os12g07810/LOC_Os12g35890/Oryza_sativa_newGene_2554	16
ko00240	Pyrimidine metabolism	15/1764	106/14082	1.13	0.34784	0.488196	LOC_Os01g51540/LOC_Os01g73450/LOC_Os04g27950/LOC_Os04g43550/LOC_Os05g13960/LOC_Os05g33630/LOC_Os05g33644/LOC_Os05g38170/LOC_Os06g14620/LOC_Os07g30170/LOC_Os07g44630/LOC_Os08g15030/LOC_Os09g39440/LOC_Os11g25330/LOC_Os12g08000	15
ko01210	2-Oxocarboxylic acid metabolism	15/1764	135/14082	0.89	0.729076	0.733652	LOC_Os01g16900/LOC_Os02g05780/LOC_Os02g10070/LOC_Os02g14110/LOC_Os03g01600/LOC_Os03g31690/LOC_Os03g41180/LOC_Os03g63330/LOC_Os04g08824/LOC_Os04g08828/LOC_Os04g08836/LOC_Os09g12190/LOC_Os10g25130/LOC_Os10g40200/LOC_Os11g14950	15
ko00250	Alanine, aspartate and glutamate metabolism	15/1764	154/14082	0.78	0.882386	0.733652	LOC_Os02g07760/LOC_Os02g14110/LOC_Os02g43470/LOC_Os03g13300/LOC_Os03g18130/LOC_Os03g58040/LOC_Os04g45970/LOC_Os04g52440/LOC_Os05g39770/LOC_Os05g48200/LOC_Os08g15030/LOC_Os09g22320/LOC_Os10g11190/LOC_Os10g25130/LOC_Os10g27040	15
ko00410	beta-Alanine metabolism	14/1764	60/14082	1.86	0.0145714	0.0601894	LOC_Os02g43194/LOC_Os02g49720/LOC_Os03g13300/LOC_Os04g57560/LOC_Os06g23114/LOC_Os06g23760/LOC_Os06g23780/LOC_Os07g09060/LOC_Os07g30170/LOC_Os09g20260/LOC_Os09g20284/LOC_Os11g39220/LOC_Os11g43900/LOC_Os12g07810	14
ko00906	Carotenoid biosynthesis	14/1764	62/14082	1.8	0.0192672	0.0601894	LOC_Os02g47470/LOC_Os02g47510/LOC_Os03g05900/LOC_Os03g05910/LOC_Os03g59610/LOC_Os04g31040/LOC_Os07g18120/LOC_Os07g18154/LOC_Os07g18158/LOC_Os07g18162/LOC_Os07g30960/LOC_Os08g36860/LOC_Os11g03390/LOC_Os12g42280	14
ko00900	Terpenoid backbone biosynthesis	14/1764	65/14082	1.72	0.0283406	0.0762378	LOC_Os01g01710/LOC_Os01g02020/LOC_Os01g50760/LOC_Os01g58790/LOC_Os01g66360/LOC_Os02g39160/LOC_Os02g45660/LOC_Os03g02710/LOC_Os03g52170/LOC_Os05g33840/LOC_Os07g09190/LOC_Os07g39270/LOC_Os08g09370/LOC_Os09g31970	14
ko00280	Valine, leucine and isoleucine degradation	14/1764	89/14082	1.26	0.219813	0.36702	LOC_Os01g02020/LOC_Os01g31494/LOC_Os02g43194/LOC_Os02g49720/LOC_Os03g01600/LOC_Os03g02710/LOC_Os03g53410/LOC_Os05g03480/LOC_Os05g06460/LOC_Os05g39770/LOC_Os07g09060/LOC_Os10g40200/LOC_Os11g43900/LOC_Os12g07810	14
ko00511	Other glycan degradation	14/1764	110/14082	1.02	0.517917	0.61166	LOC_Os01g11660/LOC_Os01g12320/LOC_Os01g46169/LOC_Os01g70870/LOC_Os02g31890/LOC_Os03g15020/LOC_Os05g11910/LOC_Os05g11950/LOC_Os05g34320/LOC_Os09g36810/LOC_Os10g25380/LOC_Os10g25420/LOC_Os11g13810/LOC_Os11g32260	14
ko00950	Isoquinoline alkaloid biosynthesis	13/1764	56/14082	1.85	0.0189533	0.0601894	LOC_Os01g56380/LOC_Os01g65090/LOC_Os02g14110/LOC_Os02g19924/LOC_Os02g19970/LOC_Os03g14730/LOC_Os06g23114/LOC_Os06g23684/LOC_Os06g37610/LOC_Os08g04540/LOC_Os08g04560/LOC_Os10g23900/LOC_Os11g42510	13
ko00945	Stilbenoid, diarylheptanoid and gingerol biosynthesis	13/1764	90/14082	1.15	0.335509	0.477814	LOC_Os02g26770/LOC_Os02g26810/LOC_Os02g39850/LOC_Os04g11970/LOC_Os04g42250/LOC_Os04g51990/LOC_Os04g56900/LOC_Os04g56910/LOC_Os06g08610/LOC_Os07g28040/LOC_Os09g37180/LOC_Os11g42290/LOC_Os11g42370	13
ko03008	Ribosome biogenesis in eukaryotes	13/1764	147/14082	0.71	0.936572	0.733652	LOC_Os01g52010/LOC_Os03g02070/LOC_Os03g28270/LOC_Os04g22870/LOC_Os05g08360/LOC_Os05g31220/LOC_Os06g13060/LOC_Os06g24920/LOC_Os08g01810/LOC_Os08g06230/LOC_Os08g29680/LOC_Os10g36200/LOC_Os12g42830	13
ko00062	Fatty acid elongation	13/1764	228/14082	0.46	0.999816	0.733652	LOC_Os02g47744/LOC_Os04g22830/LOC_Os04g47120/LOC_Os06g15020/LOC_Os06g19530/LOC_Os06g19590/LOC_Os07g15190/LOC_Os10g04316/LOC_Os10g07010/LOC_Os11g01154/LOC_Os11g06590/LOC_Os11g45864/LOC_Os12g01160	13
ko03015	mRNA surveillance pathway	13/1764	231/14082	0.45	0.999857	0.733652	LOC_Os01g50730/LOC_Os01g70210/LOC_Os02g12460/LOC_Os02g15050/LOC_Os02g51610/LOC_Os03g51430/LOC_Os03g59550/LOC_Os03g63370/LOC_Os04g38240/LOC_Os04g50870/LOC_Os08g38040/LOC_Os09g21680/LOC_Os12g01010	13
ko00960	Tropane, piperidine and pyridine alkaloid biosynthesis	13/1764	291/14082	0.36	0.999999	0.733652	LOC_Os01g65090/LOC_Os02g14110/LOC_Os02g19924/LOC_Os02g19970/LOC_Os04g20070/LOC_Os04g22660/LOC_Os05g24330/LOC_Os06g21730/LOC_Os06g23114/LOC_Os06g23684/LOC_Os11g25160/LOC_Os11g42510/LOC_Os12g41590	13
ko00910	Nitrogen metabolism	12/1764	50/14082	1.92	0.0183644	0.0601894	LOC_Os01g25484/LOC_Os01g45274/LOC_Os02g02190/LOC_Os02g43470/LOC_Os03g58040/LOC_Os04g33660/LOC_Os04g45970/LOC_Os05g48200/LOC_Os08g06530/LOC_Os08g36480/LOC_Os08g36500/LOC_Os08g36630	12
ko01040	Biosynthesis of unsaturated fatty acids	12/1764	50/14082	1.92	0.0183644	0.0601894	LOC_Os01g31494/LOC_Os01g65830/LOC_Os02g48560/LOC_Os04g47120/LOC_Os06g19530/LOC_Os06g19590/LOC_Os06g23760/LOC_Os06g23780/LOC_Os07g23410/LOC_Os07g23430/LOC_Os08g10010/LOC_Os11g39220	12
ko00061	Fatty acid biosynthesis	12/1764	64/14082	1.5	0.0980393	0.193762	LOC_Os01g65830/LOC_Os02g43090/LOC_Os04g39780/LOC_Os05g04170/LOC_Os06g06350/LOC_Os08g10010/LOC_Os09g10600/LOC_Os09g33740/LOC_Os10g31780/LOC_Os11g01154/LOC_Os11g06590/LOC_Os12g01160	12
ko00030	Pentose phosphate pathway	12/1764	78/14082	1.23	0.267458	0.422995	LOC_Os01g04200/LOC_Os01g53680/LOC_Os01g74510/LOC_Os02g03540/LOC_Os05g33380/LOC_Os05g39000/LOC_Os06g41360/LOC_Os07g41280/LOC_Os08g05830/LOC_Os08g37380/LOC_Os09g12650/LOC_Os09g29210	12
ko00770	Pantothenate and CoA biosynthesis	11/1764	57/14082	1.54	0.0938195	0.193312	LOC_Os02g05780/LOC_Os02g43194/LOC_Os02g49720/LOC_Os03g01600/LOC_Os04g57560/LOC_Os07g30170/LOC_Os10g40200/LOC_Os11g04160/LOC_Os11g14950/LOC_Os11g43900/LOC_Os12g07810	11
ko00908	Zeatin biosynthesis	11/1764	85/14082	1.03	0.502962	0.601332	LOC_Os01g10110/LOC_Os02g11640/LOC_Os02g51900/LOC_Os04g20474/LOC_Os04g25440/LOC_Os05g24660/LOC_Os07g14630/LOC_Os07g30369/LOC_Os07g30469/LOC_Os08g35860/LOC_Os10g09990	11
ko03018	RNA degradation	11/1764	198/14082	0.44	0.999674	0.733652	ChrSy.fgenesh.gene.28/LOC_Os01g53680/LOC_Os02g57030/LOC_Os04g29424/LOC_Os04g31950/LOC_Os04g58090/LOC_Os06g04510/LOC_Os08g02360/LOC_Os09g29210/LOC_Os10g28580/Oryza_sativa_newGene_2305	11
ko00965	Betalain biosynthesis	10/1764	29/14082	2.75	0.00194331	0.0117621	LOC_Os01g44430/LOC_Os01g56380/LOC_Os08g04540/LOC_Os08g04560/LOC_Os08g34010/LOC_Os09g24820/LOC_Os09g29130/LOC_Os10g23900/LOC_Os11g03420/LOC_Os12g03110	10
ko00860	Porphyrin and chlorophyll metabolism	10/1764	67/14082	1.19	0.327296	0.473074	LOC_Os01g17170/LOC_Os01g44050/LOC_Os02g02860/LOC_Os02g54980/LOC_Os03g20700/LOC_Os03g27770/LOC_Os04g58200/LOC_Os06g49110/LOC_Os10g25040/LOC_Os10g35370	10
ko00020	Citrate cycle (TCA cycle)	10/1764	80/14082	1	0.553689	0.638339	LOC_Os01g16900/LOC_Os02g10070/LOC_Os03g15050/LOC_Os05g06460/LOC_Os06g01630/LOC_Os08g33440/LOC_Os08g33720/LOC_Os10g13700/LOC_Os11g47330/LOC_Os12g08170	10
ko03050	Proteasome	9/1764	85/14082	0.85	0.753269	0.733652	LOC_Os01g72970/LOC_Os02g55720/LOC_Os03g37950/LOC_Os03g38720/LOC_Os07g28590/LOC_Os07g42260/LOC_Os08g41730/LOC_Os09g14590/LOC_Os10g26940	9
ko04145	Phagosome	9/1764	111/14082	0.65	0.947449	0.733652	LOC_Os02g47320/LOC_Os03g14690/LOC_Os03g18910/LOC_Os03g51600/LOC_Os05g34170/LOC_Os08g01390/LOC_Os09g17580/LOC_Os10g30520/LOC_Os11g19800	9
ko00196	Photosynthesis - antenna proteins	8/1764	14/14082	4.56	8.89458e-05	0.000973849	LOC_Os02g10390/LOC_Os03g39610/LOC_Os06g21590/LOC_Os07g38960/LOC_Os08g33820/LOC_Os09g17740/LOC_Os09g26810/LOC_Os11g13890	8
ko00650	Butanoate metabolism	8/1764	45/14082	1.42	0.195227	0.33761	LOC_Os01g02020/LOC_Os01g39270/LOC_Os02g07760/LOC_Os03g02710/LOC_Os03g13300/LOC_Os03g19250/LOC_Os04g52440/LOC_Os11g14950	8
ko00531	Glycosaminoglycan degradation	8/1764	51/14082	1.25	0.304458	0.460694	LOC_Os01g70550/LOC_Os01g70870/LOC_Os02g31890/LOC_Os03g15020/LOC_Os05g34320/LOC_Os06g08090/LOC_Os09g36810/LOC_Os12g38920	8
ko03410	Base excision repair	8/1764	83/14082	0.77	0.832068	0.733652	LOC_Os02g53530/LOC_Os03g41200/LOC_Os05g50420/LOC_Os08g13890/LOC_Os08g36330/LOC_Os09g39490/LOC_Os11g06800/LOC_Os12g10830	8
ko00944	Flavone and flavonol biosynthesis	7/1764	27/14082	2.07	0.0442383	0.11274	LOC_Os01g08090/LOC_Os02g28170/LOC_Os03g25150/LOC_Os04g44240/LOC_Os04g44250/LOC_Os10g16974/LOC_Os10g17260	7
ko00730	Thiamine metabolism	7/1764	32/14082	1.75	0.0970889	0.193762	LOC_Os01g25440/LOC_Os02g25230/LOC_Os03g19390/LOC_Os03g47610/LOC_Os05g33840/LOC_Os07g09190/LOC_Os12g13380	7
ko00402	Benzoxazinoid biosynthesis	7/1764	37/14082	1.51	0.173589	0.311309	LOC_Os03g58300/LOC_Os03g60960/LOC_Os06g14400/LOC_Os07g13800/LOC_Os08g01480/LOC_Os08g30100/LOC_Os11g27730	7
ko00100	Steroid biosynthesis	7/1764	52/14082	1.07	0.481144	0.58981	LOC_Os01g11340/LOC_Os01g25189/LOC_Os03g01820/LOC_Os07g10130/LOC_Os08g41780/LOC_Os11g19700/LOC_Os11g32240	7
ko00966	Glucosinolate biosynthesis	7/1764	61/14082	0.92	0.656049	0.730266	LOC_Os03g01600/LOC_Os03g41180/LOC_Os04g08824/LOC_Os04g08828/LOC_Os04g08836/LOC_Os09g12190/LOC_Os10g40200	7
ko00515	Mannose type O-glycan biosynthesis	6/1764	18/14082	2.66	0.01868	0.0601894	LOC_Os01g02930/LOC_Os02g22480/LOC_Os02g22650/LOC_Os04g12010/LOC_Os06g28124/LOC_Os12g13640	6
ko00943	Isoflavonoid biosynthesis	6/1764	22/14082	2.18	0.0486076	0.117682	LOC_Os02g28170/LOC_Os02g30100/LOC_Os03g55230/LOC_Os03g55250/LOC_Os03g55260/LOC_Os04g18380	6
ko00905	Brassinosteroid biosynthesis	6/1764	25/14082	1.92	0.0836212	0.184047	LOC_Os01g10040/LOC_Os01g63260/LOC_Os02g11020/LOC_Os05g33590/LOC_Os09g26980/LOC_Os12g04480	6
ko00760	Nicotinate and nicotinamide metabolism	6/1764	37/14082	1.29	0.315492	0.462923	LOC_Os04g20270/LOC_Os05g33630/LOC_Os05g33644/LOC_Os09g39440/LOC_Os11g08590/LOC_Os12g08000	6
ko00590	Arachidonic acid metabolism	6/1764	39/14082	1.23	0.362216	0.501111	LOC_Os01g05810/LOC_Os02g19650/LOC_Os02g44500/LOC_Os05g46460/LOC_Os06g08670/LOC_Os11g18170	6
ko00640	Propanoate metabolism	6/1764	40/14082	1.2	0.385746	0.518839	LOC_Os01g02020/LOC_Os05g06460/LOC_Os06g23760/LOC_Os06g23780/LOC_Os07g09060/LOC_Os11g39220	6
ko00220	Arginine biosynthesis	6/1764	48/14082	1	0.567581	0.646656	LOC_Os02g14110/LOC_Os02g43470/LOC_Os03g31690/LOC_Os03g58040/LOC_Os04g45970/LOC_Os10g25130	6
ko00591	Linoleic acid metabolism	5/1764	29/14082	1.38	0.294533	0.452749	LOC_Os02g10120/LOC_Os03g49350/LOC_Os03g49380/LOC_Os12g37260/LOC_Os12g37350	5
ko00604	Glycosphingolipid biosynthesis - ganglio series	5/1764	35/14082	1.14	0.45071	0.559586	LOC_Os01g70870/LOC_Os02g31890/LOC_Os03g15020/LOC_Os05g34320/LOC_Os09g36810	5
ko00740	Riboflavin metabolism	5/1764	42/14082	0.95	0.618465	0.696436	LOC_Os01g55310/LOC_Os03g02600/LOC_Os03g36750/LOC_Os04g09810/LOC_Os06g30290	5
ko00920	Sulfur metabolism	5/1764	51/14082	0.78	0.782604	0.733652	LOC_Os01g68770/LOC_Os11g29850/LOC_Os12g08280/LOC_Os12g25630/LOC_Os12g42980	5
ko04130	SNARE interactions in vesicular transport	5/1764	51/14082	0.78	0.782604	0.733652	LOC_Os02g20330/LOC_Os07g38990/LOC_Os08g14640/LOC_Os09g10000/LOC_Os12g44250	5
ko00513	Various types of N-glycan biosynthesis	5/1764	57/14082	0.7	0.85757	0.733652	LOC_Os02g36770/LOC_Os03g30934/LOC_Os03g62230/LOC_Os05g34320/LOC_Os07g23494	5
ko00903	Limonene and pinene degradation	4/1764	9/14082	3.55	0.018359	0.0601894	LOC_Os02g43194/LOC_Os02g49720/LOC_Os11g43900/LOC_Os12g07810	4
ko00603	Glycosphingolipid biosynthesis - globo and isoglobo series	4/1764	14/14082	2.28	0.0877763	0.187103	LOC_Os05g34320/LOC_Os10g35070/LOC_Os10g35110/LOC_Os10g35330	4
ko00902	Monoterpenoid biosynthesis	4/1764	16/14082	2	0.130808	0.24361	LOC_Os02g02930/LOC_Os02g42810/LOC_Os04g44924/LOC_Os04g44980	4
ko00290	Valine, leucine and isoleucine biosynthesis	4/1764	27/14082	1.18	0.443294	0.557526	LOC_Os02g05780/LOC_Os03g01600/LOC_Os10g40200/LOC_Os11g14950	4
ko00340	Histidine metabolism	4/1764	30/14082	1.06	0.528533	0.616678	LOC_Os02g43194/LOC_Os02g49720/LOC_Os11g43900/LOC_Os12g07810	4
ko00998	Biosynthesis of various secondary metabolites - part 2	3/1764	5/14082	4.79	0.0161288	0.0601894	LOC_Os12g16220/LOC_Os12g16240/LOC_Os12g16250	3
ko00440	Phosphonate and phosphinate metabolism	3/1764	13/14082	1.84	0.216789	0.36702	LOC_Os08g12830/LOC_Os10g42790/LOC_Os12g02820	3
ko00750	Vitamin B6 metabolism	3/1764	19/14082	1.26	0.431664	0.557377	LOC_Os01g39280/LOC_Os07g01020/LOC_Os07g05000	3
ko00450	Selenocompound metabolism	3/1764	30/14082	0.8	0.743801	0.733652	LOC_Os05g01470/LOC_Os06g07860/LOC_Os12g08900	3
ko00565	Ether lipid metabolism	3/1764	49/14082	0.49	0.95467	0.733652	LOC_Os05g07880/LOC_Os07g15680/LOC_Os09g37100	3
ko00790	Folate biosynthesis	3/1764	49/14082	0.49	0.95467	0.733652	LOC_Os03g62040/LOC_Os09g38777/Oryza_sativa_newGene_2489	3
ko03022	Basal transcription factors	3/1764	64/14082	0.37	0.990301	0.733652	LOC_Os09g26180/LOC_Os10g29660/LOC_Os12g04595	3
ko00510	N-Glycan biosynthesis	3/1764	65/14082	0.37	0.99128	0.733652	LOC_Os02g05400/LOC_Os02g47570/LOC_Os03g30934	3
ko03060	Protein export	3/1764	111/14082	0.22	0.999952	0.733652	LOC_Os03g18910/LOC_Os04g08340/LOC_Os05g43390	3
ko00430	Taurine and hypotaurine metabolism	2/1764	9/14082	1.77	0.313724	0.462923	LOC_Os01g05810/LOC_Os03g13300	2
ko00072	Synthesis and degradation of ketone bodies	2/1764	11/14082	1.45	0.409218	0.542535	LOC_Os01g02020/LOC_Os03g02710	2
ko00670	One carbon pool by folate	2/1764	22/14082	0.73	0.781771	0.733652	LOC_Os04g53230/LOC_Os06g22560	2
ko00901	Indole alkaloid biosynthesis	2/1764	22/14082	0.73	0.781771	0.733652	LOC_Os03g53950/LOC_Os10g39710	2
ko00514	Other types of O-glycan biosynthesis	2/1764	27/14082	0.59	0.869068	0.733652	LOC_Os01g31370/LOC_Os04g15550	2
ko00780	Biotin metabolism	2/1764	28/14082	0.57	0.882123	0.733652	LOC_Os09g10600/LOC_Os10g31780	2
ko04136	Autophagy - other	2/1764	53/14082	0.3	0.992938	0.733652	LOC_Os02g24150/LOC_Os04g53240	2
ko00601	Glycosphingolipid biosynthesis - lacto and neolacto series	1/1764	4/14082	2	0.414567	0.542535	LOC_Os09g26300	1
ko00660	C5-Branched dibasic acid metabolism	1/1764	12/14082	0.67	0.799452	0.733652	LOC_Os11g14950	1
ko04122	Sulfur relay system	1/1764	14/14082	0.57	0.846588	0.733652	LOC_Os01g41565	1
ko00261	Monobactam biosynthesis	1/1764	19/14082	0.42	0.921497	0.733652	LOC_Os03g63330	1
ko00300	Lysine biosynthesis	1/1764	24/14082	0.33	0.959839	0.733652	LOC_Os03g63330	1
ko00563	Glycosylphosphatidylinositol (GPI)-anchor biosynthesis	1/1764	31/14082	0.26	0.984293	0.733652	LOC_Os01g07212	1

## Sheet: S5
Table S5 Gene Ontology (GO) Analysis of the differentially expressed genes in Biological Process Ontology
ID	Description	Gene Ratio	Bg Ratio	Enrich_factor	p value	q value	Gene ID	Count
GO:0008150	biological_process	143/1602	1742/15655	0.8	0.998949	0.995083	LOC_Os01g01650/LOC_Os01g01860/LOC_Os01g04200/LOC_Os01g07260/LOC_Os01g08760/LOC_Os01g08880/LOC_Os01g22740/LOC_Os01g24620/LOC_Os01g25360/LOC_Os01g25500/LOC_Os01g27360/LOC_Os01g36600/LOC_Os01g37650/LOC_Os01g37870/LOC_Os01g42090/LOC_Os01g55290/LOC_Os01g55940/LOC_Os01g57520/LOC_Os01g58194/LOC_Os01g67850/LOC_Os01g73280/LOC_Os01g73560/LOC_Os01g73950/LOC_Os01g74320/LOC_Os02g11720/LOC_Os02g12200/LOC_Os02g…	143
GO:0015074	DNA integration	125/1602	4200/15655	0.29	1	0.995083	LOC_Os01g03830/LOC_Os01g13620/LOC_Os01g24630/LOC_Os01g26240/LOC_Os01g39050/LOC_Os01g45290/LOC_Os01g45810/LOC_Os01g50090/LOC_Os01g70540/LOC_Os02g05550/LOC_Os02g12320/LOC_Os02g13910/LOC_Os02g17292/LOC_Os02g20200/LOC_Os02g20630/LOC_Os02g20640/LOC_Os02g22570/LOC_Os02g32230/LOC_Os02g38380/LOC_Os02g53470/LOC_Os02g56060/LOC_Os02g57930/LOC_Os03g05350/LOC_Os03g06560/LOC_Os03g13260/LOC_Os03g21050/LOC_Os03g…	125
GO:0006952	defense response	120/1602	453/15655	2.59	1.84495e-23	4.49975e-20	LOC_Os01g05620/LOC_Os01g25360/LOC_Os01g25760/LOC_Os01g37650/LOC_Os01g41890/LOC_Os01g57420/LOC_Os01g74320/LOC_Os02g05686/LOC_Os02g10350/LOC_Os02g17304/LOC_Os02g38392/LOC_Os02g39280/LOC_Os02g40340/LOC_Os03g14050/LOC_Os03g23050/LOC_Os03g60220/LOC_Os03g62790/LOC_Os04g11760/LOC_Os04g12830/LOC_Os04g14220/LOC_Os04g21890/LOC_Os05g41290/LOC_Os06g06390/LOC_Os06g11990/LOC_Os06g16300/LOC_Os06g22460/LOC_Os06g…	120
GO:0009987	cellular process	110/1602	1397/15655	0.77	0.999294	0.995083	LOC_Os01g01650/LOC_Os01g01860/LOC_Os01g04200/LOC_Os01g07260/LOC_Os01g08760/LOC_Os01g08880/LOC_Os01g22740/LOC_Os01g24620/LOC_Os01g25360/LOC_Os01g27360/LOC_Os01g36600/LOC_Os01g37650/LOC_Os01g37870/LOC_Os01g42090/LOC_Os01g55290/LOC_Os01g57520/LOC_Os01g58194/LOC_Os01g67850/LOC_Os01g73280/LOC_Os01g73560/LOC_Os01g73950/LOC_Os01g74320/LOC_Os02g12200/LOC_Os02g31160/LOC_Os02g42210/LOC_Os02g43770/LOC_Os02g…	110
GO:0006355	regulation of transcription, DNA-templated	94/1602	982/15655	0.94	0.774824	0.852674	LOC_Os01g09450/LOC_Os01g13030/LOC_Os01g13520/LOC_Os01g17396/LOC_Os01g24070/LOC_Os01g48060/LOC_Os01g48130/LOC_Os01g48290/LOC_Os01g67850/LOC_Os02g05640/LOC_Os02g12790/LOC_Os02g12820/LOC_Os02g31160/LOC_Os02g34970/LOC_Os02g35770/LOC_Os02g36780/LOC_Os02g45760/LOC_Os02g47660/LOC_Os02g51760/LOC_Os02g53530/LOC_Os03g01870/LOC_Os03g03900/LOC_Os03g08960/LOC_Os03g10210/LOC_Os03g11680/LOC_Os03g21060/LOC_Os03g…	94
GO:0008152	metabolic process	88/1602	1125/15655	0.76	0.998203	0.995083	LOC_Os01g01860/LOC_Os01g04200/LOC_Os01g07260/LOC_Os01g08760/LOC_Os01g08880/LOC_Os01g22740/LOC_Os01g24620/LOC_Os01g25360/LOC_Os01g25500/LOC_Os01g27360/LOC_Os01g36600/LOC_Os01g37650/LOC_Os01g37870/LOC_Os01g55290/LOC_Os01g57520/LOC_Os01g58194/LOC_Os01g67850/LOC_Os01g73280/LOC_Os01g73950/LOC_Os01g74320/LOC_Os02g11720/LOC_Os02g42210/LOC_Os02g51350/LOC_Os02g51410/LOC_Os02g52130/LOC_Os02g52220/LOC_Os02g…	88
GO:0005975	carbohydrate metabolic process	82/1602	400/15655	2	5.1034e-10	4.14898e-07	LOC_Os01g03710/LOC_Os01g18400/LOC_Os01g19170/LOC_Os01g32364/LOC_Os01g43160/LOC_Os01g47070/LOC_Os01g51754/LOC_Os01g58740/LOC_Os01g59840/LOC_Os01g64100/LOC_Os01g71380/LOC_Os01g71410/LOC_Os01g71810/LOC_Os01g71820/LOC_Os01g71830/LOC_Os01g71930/LOC_Os02g08030/LOC_Os02g39330/LOC_Os02g53200/LOC_Os03g04060/LOC_Os03g13690/LOC_Os03g15020/LOC_Os03g25790/LOC_Os03g46660/LOC_Os03g49600/LOC_Os03g51240/LOC_Os03g…	82
GO:0071704	organic substance metabolic process	78/1602	1059/15655	0.72	0.999629	0.995083	LOC_Os01g01860/LOC_Os01g04200/LOC_Os01g07260/LOC_Os01g08760/LOC_Os01g08880/LOC_Os01g22740/LOC_Os01g24620/LOC_Os01g25360/LOC_Os01g27360/LOC_Os01g36600/LOC_Os01g37650/LOC_Os01g37870/LOC_Os01g55290/LOC_Os01g57520/LOC_Os01g67850/LOC_Os01g73280/LOC_Os01g73950/LOC_Os01g74320/LOC_Os02g11720/LOC_Os02g42210/LOC_Os02g51350/LOC_Os02g51410/LOC_Os02g52130/LOC_Os02g52220/LOC_Os02g55310/LOC_Os02g57400/LOC_Os03g…	78
GO:0050896	response to stimulus	76/1602	885/15655	0.84	0.959846	0.981146	LOC_Os01g01650/LOC_Os01g01860/LOC_Os01g07260/LOC_Os01g08760/LOC_Os01g22740/LOC_Os01g24620/LOC_Os01g25360/LOC_Os01g25500/LOC_Os01g37650/LOC_Os01g55940/LOC_Os01g58194/LOC_Os01g67850/LOC_Os01g73280/LOC_Os01g74320/LOC_Os02g11720/LOC_Os02g31160/LOC_Os02g39280/LOC_Os02g43770/LOC_Os02g51710/LOC_Os02g52130/LOC_Os02g53400/LOC_Os02g53530/LOC_Os03g03920/LOC_Os03g11680/LOC_Os03g18200/LOC_Os03g23050/LOC_Os03g…	76
GO:0044237	cellular metabolic process	76/1602	1062/15655	0.7	0.999861	0.995083	LOC_Os01g01860/LOC_Os01g04200/LOC_Os01g07260/LOC_Os01g08760/LOC_Os01g08880/LOC_Os01g22740/LOC_Os01g24620/LOC_Os01g25360/LOC_Os01g27360/LOC_Os01g36600/LOC_Os01g37650/LOC_Os01g37870/LOC_Os01g55290/LOC_Os01g57520/LOC_Os01g67850/LOC_Os01g73280/LOC_Os01g73950/LOC_Os01g74320/LOC_Os02g42210/LOC_Os02g51350/LOC_Os02g51410/LOC_Os02g52130/LOC_Os02g52220/LOC_Os02g55310/LOC_Os02g57400/LOC_Os03g03920/LOC_Os03g…	76
GO:0065007	biological regulation	70/1602	983/15655	0.7	0.999795	0.995083	LOC_Os01g01860/LOC_Os01g08880/LOC_Os01g22740/LOC_Os01g24620/LOC_Os01g25360/LOC_Os01g37650/LOC_Os01g55940/LOC_Os01g67850/LOC_Os01g73280/LOC_Os02g31160/LOC_Os02g45760/LOC_Os02g51350/LOC_Os02g52130/LOC_Os02g53400/LOC_Os02g53530/LOC_Os02g56570/LOC_Os02g57120/LOC_Os03g03900/LOC_Os03g03920/LOC_Os03g11680/LOC_Os03g23050/LOC_Os03g38560/LOC_Os03g46230/LOC_Os03g52820/LOC_Os03g53990/LOC_Os03g57200/LOC_Os03g…	70
GO:0006807	nitrogen compound metabolic process	70/1602	1000/15655	0.68	0.999896	0.995083	LOC_Os01g01860/LOC_Os01g04200/LOC_Os01g07260/LOC_Os01g08760/LOC_Os01g08880/LOC_Os01g22740/LOC_Os01g24620/LOC_Os01g27360/LOC_Os01g36600/LOC_Os01g37470/LOC_Os01g37870/LOC_Os01g55290/LOC_Os01g57520/LOC_Os01g67850/LOC_Os01g73280/LOC_Os01g73950/LOC_Os01g74320/LOC_Os02g42210/LOC_Os02g42330/LOC_Os02g51350/LOC_Os02g51410/LOC_Os02g52130/LOC_Os02g52220/LOC_Os02g55310/LOC_Os03g03920/LOC_Os03g23050/LOC_Os03g…	70
GO:0044238	primary metabolic process	70/1602	1020/15655	0.67	0.999955	0.995083	LOC_Os01g01860/LOC_Os01g04200/LOC_Os01g07260/LOC_Os01g08760/LOC_Os01g08880/LOC_Os01g22740/LOC_Os01g24620/LOC_Os01g36600/LOC_Os01g37870/LOC_Os01g55290/LOC_Os01g57520/LOC_Os01g67850/LOC_Os01g73280/LOC_Os01g73950/LOC_Os01g74320/LOC_Os02g11720/LOC_Os02g42210/LOC_Os02g51350/LOC_Os02g51410/LOC_Os02g52130/LOC_Os02g52220/LOC_Os02g55310/LOC_Os03g03920/LOC_Os03g13690/LOC_Os03g23050/LOC_Os03g38560/LOC_Os03g…	70
GO:0050789	regulation of biological process	64/1602	942/15655	0.66	0.999938	0.995083	LOC_Os01g01860/LOC_Os01g08880/LOC_Os01g22740/LOC_Os01g24620/LOC_Os01g67850/LOC_Os01g73280/LOC_Os02g31160/LOC_Os02g45760/LOC_Os02g51350/LOC_Os02g52130/LOC_Os02g53400/LOC_Os02g53530/LOC_Os02g56570/LOC_Os02g57120/LOC_Os03g03900/LOC_Os03g03920/LOC_Os03g11680/LOC_Os03g23050/LOC_Os03g38560/LOC_Os03g46230/LOC_Os03g52820/LOC_Os03g57200/LOC_Os03g58040/LOC_Os03g59610/LOC_Os03g62790/LOC_Os04g31340/LOC_Os04g…	64
GO:0043170	macromolecule metabolic process	59/1602	967/15655	0.6	0.999999	0.995083	LOC_Os01g01860/LOC_Os01g04200/LOC_Os01g07260/LOC_Os01g08880/LOC_Os01g22740/LOC_Os01g24620/LOC_Os01g36600/LOC_Os01g37870/LOC_Os01g55290/LOC_Os01g57520/LOC_Os01g67850/LOC_Os01g73280/LOC_Os01g73950/LOC_Os01g74320/LOC_Os02g42210/LOC_Os02g51350/LOC_Os02g52130/LOC_Os02g52220/LOC_Os02g55310/LOC_Os03g03920/LOC_Os03g23050/LOC_Os03g38560/LOC_Os03g46230/LOC_Os03g52820/LOC_Os03g53170/LOC_Os04g01160/LOC_Os04g…	59
GO:0050794	regulation of cellular process	53/1602	864/15655	0.6	0.999995	0.995083	LOC_Os01g01860/LOC_Os01g08880/LOC_Os01g22740/LOC_Os01g24620/LOC_Os01g67850/LOC_Os01g73280/LOC_Os02g31160/LOC_Os02g45760/LOC_Os02g53400/LOC_Os02g53530/LOC_Os02g56570/LOC_Os02g57120/LOC_Os03g03900/LOC_Os03g03920/LOC_Os03g11680/LOC_Os03g38560/LOC_Os03g46230/LOC_Os03g52820/LOC_Os03g59610/LOC_Os03g62790/LOC_Os04g31340/LOC_Os04g32480/LOC_Os04g47700/LOC_Os04g51130/LOC_Os05g16130/LOC_Os05g37190/LOC_Os05g…	53
GO:0048544	recognition of pollen	46/1602	115/15655	3.91	4.178e-17	5.09496e-14	LOC_Os01g06240/LOC_Os01g12430/LOC_Os01g40499/LOC_Os01g45520/LOC_Os01g48000/LOC_Os01g48040/LOC_Os01g57480/LOC_Os01g57510/LOC_Os01g57540/LOC_Os01g65060/LOC_Os01g66250/LOC_Os01g66680/LOC_Os03g30890/LOC_Os03g35600/LOC_Os04g01310/LOC_Os04g01320/LOC_Os04g15580/LOC_Os04g34250/LOC_Os04g34270/LOC_Os04g34370/LOC_Os04g34410/LOC_Os04g53994/LOC_Os04g54080/LOC_Os04g54180/LOC_Os04g56080/LOC_Os05g07080/LOC_Os05g…	46
GO:1901564	organonitrogen compound metabolic process	44/1602	679/15655	0.63	0.999815	0.995083	LOC_Os01g01860/LOC_Os01g08760/LOC_Os01g08880/LOC_Os01g22740/LOC_Os01g24620/LOC_Os01g27360/LOC_Os01g57520/LOC_Os01g67850/LOC_Os01g73280/LOC_Os01g74320/LOC_Os02g51350/LOC_Os02g51410/LOC_Os02g52130/LOC_Os03g03920/LOC_Os03g23050/LOC_Os03g38560/LOC_Os03g46230/LOC_Os03g52820/LOC_Os03g57200/LOC_Os03g59610/LOC_Os04g01160/LOC_Os04g54800/LOC_Os05g16130/LOC_Os05g45040/LOC_Os06g11990/LOC_Os06g12150/LOC_Os06g…	44
GO:0043412	macromolecule modification	43/1602	788/15655	0.53	1	0.995083	LOC_Os01g01860/LOC_Os01g08880/LOC_Os01g22740/LOC_Os01g24620/LOC_Os01g36600/LOC_Os01g37870/LOC_Os01g55290/LOC_Os01g57520/LOC_Os01g67850/LOC_Os01g73950/LOC_Os01g74320/LOC_Os02g42210/LOC_Os02g52130/LOC_Os02g52220/LOC_Os02g55310/LOC_Os03g23050/LOC_Os03g38560/LOC_Os03g46230/LOC_Os03g52820/LOC_Os03g53170/LOC_Os04g01160/LOC_Os04g28310/LOC_Os04g52725/LOC_Os04g55090/LOC_Os04g58970/LOC_Os05g04160/LOC_Os05g…	43
GO:0006979	response to oxidative stress	42/1602	230/15655	1.78	0.000142749	0.0267814	LOC_Os01g16450/LOC_Os01g57730/LOC_Os01g73200/LOC_Os02g02400/LOC_Os02g11720/LOC_Os02g14430/LOC_Os02g34810/LOC_Os02g44500/LOC_Os02g53400/LOC_Os03g13180/LOC_Os03g55410/LOC_Os03g57200/LOC_Os04g39100/LOC_Os04g39780/LOC_Os04g53640/LOC_Os04g59150/LOC_Os04g59200/LOC_Os04g59210/LOC_Os05g04490/LOC_Os05g05600/LOC_Os05g12090/LOC_Os06g08670/LOC_Os06g13050/LOC_Os06g32990/LOC_Os06g33100/LOC_Os06g35520/LOC_Os06g…	42
GO:0051716	cellular response to stimulus	42/1602	592/15655	0.69	0.997083	0.995083	LOC_Os01g01650/LOC_Os01g01860/LOC_Os01g07260/LOC_Os01g22740/LOC_Os01g24620/LOC_Os01g58194/LOC_Os01g67850/LOC_Os01g73280/LOC_Os02g31160/LOC_Os02g43770/LOC_Os02g53400/LOC_Os02g53530/LOC_Os03g03920/LOC_Os03g11680/LOC_Os03g18200/LOC_Os03g38560/LOC_Os03g46230/LOC_Os03g52820/LOC_Os03g57200/LOC_Os03g58040/LOC_Os03g59610/LOC_Os03g62790/LOC_Os04g48370/LOC_Os05g05600/LOC_Os05g16130/LOC_Os05g50990/LOC_Os06g…	42
GO:0042221	response to chemical	41/1602	313/15655	1.28	0.0589585	0.33101	LOC_Os01g25500/LOC_Os01g55940/LOC_Os01g58194/LOC_Os01g73280/LOC_Os02g11720/LOC_Os02g31160/LOC_Os02g43770/LOC_Os02g51710/LOC_Os02g52130/LOC_Os02g53400/LOC_Os02g53530/LOC_Os03g03920/LOC_Os03g11680/LOC_Os03g57200/LOC_Os03g58040/LOC_Os03g59610/LOC_Os03g60220/LOC_Os03g62790/LOC_Os04g17660/LOC_Os04g34670/LOC_Os04g48370/LOC_Os05g05600/LOC_Os05g32070/LOC_Os05g50990/LOC_Os06g11990/LOC_Os06g13060/LOC_Os06g…	41
GO:0006468	protein phosphorylation	41/1602	478/15655	0.84	0.903904	0.941407	LOC_Os01g01860/LOC_Os01g04409/LOC_Os01g08880/LOC_Os01g22740/LOC_Os01g24620/LOC_Os01g54700/LOC_Os01g57520/LOC_Os01g70260/LOC_Os02g56370/LOC_Os03g13820/LOC_Os03g35600/LOC_Os03g38560/LOC_Os03g46230/LOC_Os03g52820/LOC_Os03g62340/LOC_Os03g62430/LOC_Os04g29770/LOC_Os04g30240/LOC_Os04g51050/LOC_Os04g53994/LOC_Os04g54180/LOC_Os05g16130/LOC_Os05g32170/LOC_Os06g16300/LOC_Os06g39940/LOC_Os06g45260/LOC_Os07g…	41
GO:0044260	cellular macromolecule metabolic process	41/1602	703/15655	0.57	0.999991	0.995083	LOC_Os01g01860/LOC_Os01g07260/LOC_Os01g08880/LOC_Os01g22740/LOC_Os01g24620/LOC_Os01g57520/LOC_Os01g67850/LOC_Os01g73280/LOC_Os01g74320/LOC_Os02g51350/LOC_Os02g52130/LOC_Os03g03920/LOC_Os03g23050/LOC_Os03g38560/LOC_Os03g46230/LOC_Os03g52820/LOC_Os04g01160/LOC_Os05g16130/LOC_Os05g28040/LOC_Os05g45040/LOC_Os06g11990/LOC_Os06g16300/LOC_Os06g39940/LOC_Os06g42824/LOC_Os06g45260/LOC_Os07g07760/LOC_Os07g…	41
GO:0032502	developmental process	39/1602	368/15655	1.04	0.433277	0.629761	LOC_Os01g08880/LOC_Os01g42090/LOC_Os01g67850/LOC_Os01g73280/LOC_Os02g53530/LOC_Os02g56820/LOC_Os02g57120/LOC_Os03g11680/LOC_Os03g18200/LOC_Os03g23050/LOC_Os03g53990/LOC_Os04g01160/LOC_Os04g28310/LOC_Os04g34670/LOC_Os04g51130/LOC_Os05g05600/LOC_Os05g28040/LOC_Os05g32070/LOC_Os05g34160/LOC_Os05g50990/LOC_Os06g11990/LOC_Os06g20440/LOC_Os06g46754/LOC_Os07g05470/LOC_Os07g49114/LOC_Os08g41690/LOC_Os09g…	39
GO:0006950	response to stress	38/1602	276/15655	1.35	0.0358208	0.33101	LOC_Os01g01650/LOC_Os01g07260/LOC_Os01g08760/LOC_Os01g25360/LOC_Os01g37650/LOC_Os01g67850/LOC_Os01g73280/LOC_Os01g74320/LOC_Os02g11720/LOC_Os02g39280/LOC_Os02g51710/LOC_Os02g53400/LOC_Os03g03920/LOC_Os03g18200/LOC_Os03g23050/LOC_Os03g57200/LOC_Os03g58040/LOC_Os03g59610/LOC_Os03g60220/LOC_Os03g62790/LOC_Os04g32480/LOC_Os05g05600/LOC_Os05g12090/LOC_Os05g50990/LOC_Os06g11740/LOC_Os06g11990/LOC_Os06g…	38
GO:0048856	anatomical structure development	38/1602	338/15655	1.1	0.292943	0.528065	LOC_Os01g08880/LOC_Os01g42090/LOC_Os01g67850/LOC_Os01g73280/LOC_Os02g53530/LOC_Os02g56820/LOC_Os02g57120/LOC_Os03g11680/LOC_Os03g18200/LOC_Os03g23050/LOC_Os03g53990/LOC_Os04g01160/LOC_Os04g28310/LOC_Os04g34670/LOC_Os04g51130/LOC_Os05g05600/LOC_Os05g28040/LOC_Os05g32070/LOC_Os05g50990/LOC_Os06g11990/LOC_Os06g20440/LOC_Os06g46754/LOC_Os07g05470/LOC_Os07g49114/LOC_Os09g33850/LOC_Os09g35620/LOC_Os10g…	38
GO:1901360	organic cyclic compound metabolic process	38/1602	388/15655	0.96	0.638815	0.766751	LOC_Os01g04200/LOC_Os01g07260/LOC_Os01g08880/LOC_Os01g25360/LOC_Os01g36600/LOC_Os01g37650/LOC_Os01g37870/LOC_Os01g55290/LOC_Os01g67850/LOC_Os01g73280/LOC_Os01g73950/LOC_Os02g42210/LOC_Os02g51410/LOC_Os02g52220/LOC_Os02g55310/LOC_Os03g53170/LOC_Os03g57200/LOC_Os03g59610/LOC_Os04g28310/LOC_Os04g48370/LOC_Os04g52725/LOC_Os04g54800/LOC_Os04g55090/LOC_Os04g58970/LOC_Os05g04160/LOC_Os05g28040/LOC_Os06g…	38
GO:0006725	cellular aromatic compound metabolic process	37/1602	384/15655	0.94	0.677119	0.787158	LOC_Os01g04200/LOC_Os01g07260/LOC_Os01g08880/LOC_Os01g25360/LOC_Os01g36600/LOC_Os01g37650/LOC_Os01g37870/LOC_Os01g55290/LOC_Os01g67850/LOC_Os01g73280/LOC_Os01g73950/LOC_Os02g42210/LOC_Os02g51410/LOC_Os02g52220/LOC_Os02g55310/LOC_Os03g53170/LOC_Os03g57200/LOC_Os04g28310/LOC_Os04g48370/LOC_Os04g52725/LOC_Os04g54800/LOC_Os04g55090/LOC_Os04g58970/LOC_Os05g04160/LOC_Os05g28040/LOC_Os06g08570/LOC_Os06g…	37
GO:0006412	translation	37/1602	403/15655	0.9	0.782708	0.855663	LOC_Os01g25610/LOC_Os01g41030/LOC_Os02g13910/LOC_Os02g27769/LOC_Os02g51790/LOC_Os02g53230/LOC_Os03g37970/LOC_Os03g48840/LOC_Os03g54860/LOC_Os03g61260/LOC_Os04g16818/LOC_Os04g25540/LOC_Os04g50870/LOC_Os04g50990/LOC_Os04g52361/LOC_Os06g34780/LOC_Os06g35730/LOC_Os06g46930/LOC_Os06g51524/LOC_Os06g51530/LOC_Os07g07719/LOC_Os07g07760/LOC_Os07g07770/LOC_Os07g10660/LOC_Os07g33860/LOC_Os07g42450/LOC_Os08g…	37
GO:0019538	protein metabolic process	36/1602	634/15655	0.55	0.999988	0.995083	LOC_Os01g01860/LOC_Os01g08880/LOC_Os01g22740/LOC_Os01g24620/LOC_Os01g57520/LOC_Os01g67850/LOC_Os01g73280/LOC_Os01g74320/LOC_Os02g51350/LOC_Os02g52130/LOC_Os03g03920/LOC_Os03g23050/LOC_Os03g38560/LOC_Os03g46230/LOC_Os03g52820/LOC_Os04g01160/LOC_Os05g16130/LOC_Os05g45040/LOC_Os06g11990/LOC_Os06g16300/LOC_Os06g39940/LOC_Os06g42824/LOC_Os06g45260/LOC_Os07g07760/LOC_Os07g07820/LOC_Os07g10060/LOC_Os07g…	36
GO:0044267	cellular protein metabolic process	35/1602	618/15655	0.55	0.999986	0.995083	LOC_Os01g01860/LOC_Os01g08880/LOC_Os01g22740/LOC_Os01g24620/LOC_Os01g57520/LOC_Os01g67850/LOC_Os01g73280/LOC_Os01g74320/LOC_Os02g51350/LOC_Os02g52130/LOC_Os03g03920/LOC_Os03g23050/LOC_Os03g38560/LOC_Os03g46230/LOC_Os03g52820/LOC_Os04g01160/LOC_Os05g16130/LOC_Os05g45040/LOC_Os06g11990/LOC_Os06g16300/LOC_Os06g39940/LOC_Os06g42824/LOC_Os06g45260/LOC_Os07g07760/LOC_Os07g07820/LOC_Os07g10060/LOC_Os07g…	35
GO:0009058	biosynthetic process	34/1602	258/15655	1.29	0.0743712	0.33101	LOC_Os01g07260/LOC_Os01g08760/LOC_Os01g08880/LOC_Os01g16146/LOC_Os01g73280/LOC_Os02g14110/LOC_Os02g19924/LOC_Os02g19970/LOC_Os02g51410/LOC_Os02g57400/LOC_Os03g53950/LOC_Os03g59610/LOC_Os04g01354/LOC_Os04g48850/LOC_Os04g54800/LOC_Os05g01470/LOC_Os05g28040/LOC_Os05g37190/LOC_Os06g11990/LOC_Os06g12150/LOC_Os06g22560/LOC_Os06g23684/LOC_Os07g07760/LOC_Os08g12830/LOC_Os09g39310/LOC_Os10g25130/LOC_Os10g…	34
GO:0071555	cell wall organization	33/1602	189/15655	1.71	0.00154656	0.179618	LOC_Os01g19170/LOC_Os01g42090/LOC_Os01g43160/LOC_Os01g52710/LOC_Os01g66830/LOC_Os01g74330/LOC_Os02g17534/LOC_Os02g25630/LOC_Os02g29530/LOC_Os02g46910/LOC_Os02g47400/LOC_Os02g52560/LOC_Os03g03730/LOC_Os03g63280/LOC_Os04g01280/LOC_Os06g11990/LOC_Os06g51160/LOC_Os07g14160/LOC_Os07g24190/LOC_Os07g36690/LOC_Os07g36700/LOC_Os07g39990/LOC_Os07g44070/LOC_Os08g24750/LOC_Os09g26810/LOC_Os09g30120/LOC_Os09g…	33
GO:0032501	multicellular organismal process	32/1602	303/15655	1.03	0.452772	0.650782	LOC_Os01g08880/LOC_Os01g42090/LOC_Os01g67850/LOC_Os01g73280/LOC_Os01g73560/LOC_Os02g56820/LOC_Os03g18200/LOC_Os03g23050/LOC_Os03g53990/LOC_Os04g01160/LOC_Os04g28310/LOC_Os04g34670/LOC_Os05g05600/LOC_Os05g32070/LOC_Os05g50990/LOC_Os06g11990/LOC_Os06g20440/LOC_Os06g46754/LOC_Os07g05470/LOC_Os07g49114/LOC_Os09g33850/LOC_Os09g35620/LOC_Os10g10580/LOC_Os11g04600/LOC_Os11g43800/LOC_Os12g04410/LOC_Os12g…	32
GO:0019222	regulation of metabolic process	32/1602	372/15655	0.84	0.873855	0.921837	LOC_Os01g67850/LOC_Os01g73280/LOC_Os02g31160/LOC_Os02g45760/LOC_Os02g51350/LOC_Os02g52130/LOC_Os02g53530/LOC_Os03g03900/LOC_Os03g03920/LOC_Os03g11680/LOC_Os03g23050/LOC_Os03g58040/LOC_Os03g59610/LOC_Os03g62790/LOC_Os04g31340/LOC_Os04g32480/LOC_Os04g48370/LOC_Os04g51130/LOC_Os05g37190/LOC_Os06g42824/LOC_Os07g04730/LOC_Os07g05830/LOC_Os07g48900/LOC_Os08g13130/LOC_Os09g25550/LOC_Os09g35620/LOC_Os10g…	32
GO:0007165	signal transduction	31/1602	529/15655	0.57	0.999891	0.995083	LOC_Os01g01860/LOC_Os01g18800/LOC_Os01g22740/LOC_Os01g24620/LOC_Os01g73630/LOC_Os02g53530/LOC_Os03g11680/LOC_Os03g38560/LOC_Os03g46230/LOC_Os03g52820/LOC_Os03g59610/LOC_Os03g62790/LOC_Os05g16130/LOC_Os05g50990/LOC_Os06g16300/LOC_Os06g39940/LOC_Os06g45260/LOC_Os07g10060/LOC_Os07g20200/LOC_Os07g37950/LOC_Os08g04130/LOC_Os08g19360/LOC_Os09g25090/LOC_Os09g35620/LOC_Os09g39310/LOC_Os11g02240/LOC_Os11g…	31
GO:0034641	cellular nitrogen compound metabolic process	30/1602	406/15655	0.72	0.980873	0.993373	LOC_Os01g04200/LOC_Os01g07260/LOC_Os01g08880/LOC_Os01g27360/LOC_Os01g36600/LOC_Os01g37870/LOC_Os01g55290/LOC_Os01g67850/LOC_Os01g73280/LOC_Os01g73950/LOC_Os02g42210/LOC_Os02g52220/LOC_Os02g55310/LOC_Os03g53170/LOC_Os03g57200/LOC_Os04g28310/LOC_Os04g48370/LOC_Os04g52725/LOC_Os04g55090/LOC_Os04g58970/LOC_Os05g04160/LOC_Os05g28040/LOC_Os06g08570/LOC_Os07g07760/LOC_Os09g25550/LOC_Os09g39440/LOC_Os10g…	30
GO:0007154	cell communication	30/1602	491/15655	0.6	0.999591	0.995083	LOC_Os01g01650/LOC_Os01g01860/LOC_Os01g22740/LOC_Os01g24620/LOC_Os02g53530/LOC_Os03g11680/LOC_Os03g38560/LOC_Os03g46230/LOC_Os03g52820/LOC_Os03g57200/LOC_Os03g58040/LOC_Os03g59610/LOC_Os03g62790/LOC_Os04g34670/LOC_Os05g16130/LOC_Os05g50990/LOC_Os06g16300/LOC_Os06g20440/LOC_Os06g39940/LOC_Os06g45260/LOC_Os07g10060/LOC_Os07g20200/LOC_Os08g04130/LOC_Os08g19360/LOC_Os09g35620/LOC_Os09g39310/LOC_Os11g…	30
GO:0006629	lipid metabolic process	29/1602	166/15655	1.71	0.00285653	0.253042	LOC_Os01g08760/LOC_Os01g43140/LOC_Os01g47410/LOC_Os01g67430/LOC_Os02g11720/LOC_Os02g37770/LOC_Os02g37800/LOC_Os02g48560/LOC_Os02g52830/LOC_Os03g30130/LOC_Os03g52010/LOC_Os03g57080/LOC_Os03g59610/LOC_Os05g32380/LOC_Os06g10850/LOC_Os07g23340/LOC_Os07g23380/LOC_Os07g23410/LOC_Os07g23430/LOC_Os07g29220/LOC_Os08g04800/LOC_Os08g39350/LOC_Os08g42390/LOC_Os08g44360/LOC_Os09g39310/LOC_Os11g01340/LOC_Os12g…	29
GO:0051704	multi-organism process	29/1602	176/15655	1.61	0.00670269	0.33101	LOC_Os01g25360/LOC_Os01g37650/LOC_Os01g67850/LOC_Os01g73280/LOC_Os01g73560/LOC_Os01g74320/LOC_Os02g31160/LOC_Os02g39280/LOC_Os03g18200/LOC_Os03g23050/LOC_Os03g60220/LOC_Os03g62790/LOC_Os04g34670/LOC_Os06g11990/LOC_Os06g16300/LOC_Os06g20440/LOC_Os06g46754/LOC_Os07g04730/LOC_Os07g05470/LOC_Os07g49114/LOC_Os08g04130/LOC_Os09g35620/LOC_Os10g03400/LOC_Os11g04600/LOC_Os11g29350/LOC_Os12g04410/LOC_Os12g…	29
GO:0060255	regulation of macromolecule metabolic process	29/1602	339/15655	0.84	0.870522	0.920224	LOC_Os01g67850/LOC_Os01g73280/LOC_Os02g31160/LOC_Os02g45760/LOC_Os02g51350/LOC_Os02g52130/LOC_Os02g53530/LOC_Os03g03900/LOC_Os03g03920/LOC_Os03g11680/LOC_Os03g23050/LOC_Os03g62790/LOC_Os04g31340/LOC_Os04g32480/LOC_Os04g48370/LOC_Os04g51130/LOC_Os05g37190/LOC_Os06g42824/LOC_Os07g05830/LOC_Os07g48900/LOC_Os08g13130/LOC_Os09g25550/LOC_Os09g35620/LOC_Os10g25300/LOC_Os11g04600/LOC_Os11g05470/LOC_Os11g…	29
GO:0046483	heterocycle metabolic process	29/1602	369/15655	0.77	0.950549	0.974092	LOC_Os01g04200/LOC_Os01g07260/LOC_Os01g08880/LOC_Os01g36600/LOC_Os01g37870/LOC_Os01g55290/LOC_Os01g67850/LOC_Os01g73280/LOC_Os01g73950/LOC_Os02g42210/LOC_Os02g52220/LOC_Os02g55310/LOC_Os03g53170/LOC_Os03g59610/LOC_Os04g28310/LOC_Os04g48370/LOC_Os04g52725/LOC_Os04g55090/LOC_Os04g58970/LOC_Os05g04160/LOC_Os05g28040/LOC_Os06g08570/LOC_Os08g04130/LOC_Os09g25550/LOC_Os09g39440/LOC_Os10g25300/LOC_Os11g…	29
GO:0007275	multicellular organism development	28/1602	298/15655	0.92	0.712682	0.814905	LOC_Os01g08880/LOC_Os01g42090/LOC_Os01g67850/LOC_Os01g73280/LOC_Os02g56820/LOC_Os03g23050/LOC_Os03g24040/LOC_Os03g53990/LOC_Os04g01160/LOC_Os04g28310/LOC_Os04g34670/LOC_Os05g05600/LOC_Os05g32070/LOC_Os05g50990/LOC_Os06g11990/LOC_Os06g20440/LOC_Os07g05470/LOC_Os07g49114/LOC_Os09g33850/LOC_Os09g35620/LOC_Os10g10580/LOC_Os11g04600/LOC_Os11g43800/LOC_Os12g04410/LOC_Os12g42120/Oryza_sativa_newGene_327…	28
GO:0006139	nucleobase-containing compound metabolic process	28/1602	359/15655	0.76	0.952543	0.974907	LOC_Os01g04200/LOC_Os01g07260/LOC_Os01g08880/LOC_Os01g36600/LOC_Os01g37870/LOC_Os01g55290/LOC_Os01g67850/LOC_Os01g73280/LOC_Os01g73950/LOC_Os02g42210/LOC_Os02g52220/LOC_Os02g55310/LOC_Os03g53170/LOC_Os04g28310/LOC_Os04g48370/LOC_Os04g52725/LOC_Os04g55090/LOC_Os04g58970/LOC_Os05g04160/LOC_Os05g28040/LOC_Os06g08570/LOC_Os09g25550/LOC_Os09g37920/LOC_Os09g39440/LOC_Os10g25300/LOC_Os11g39710/LOC_Os11g…	28
GO:0010033	response to organic substance	27/1602	220/15655	1.2	0.184124	0.424026	LOC_Os01g55940/LOC_Os01g73280/LOC_Os02g31160/LOC_Os02g52130/LOC_Os02g53530/LOC_Os03g03920/LOC_Os03g11680/LOC_Os03g57200/LOC_Os03g59610/LOC_Os03g60220/LOC_Os03g62790/LOC_Os04g48370/LOC_Os05g32070/LOC_Os05g50990/LOC_Os06g13060/LOC_Os06g30370/LOC_Os07g05470/LOC_Os07g49114/LOC_Os08g04130/LOC_Os09g35620/LOC_Os09g39310/LOC_Os10g10580/LOC_Os11g04600/LOC_Os11g05470/LOC_Os12g04410/LOC_Os12g41590/Oryza_sat…	27
GO:0080090	regulation of primary metabolic process	27/1602	332/15655	0.79	0.917981	0.953133	LOC_Os01g67850/LOC_Os01g73280/LOC_Os02g31160/LOC_Os02g45760/LOC_Os02g51350/LOC_Os02g53530/LOC_Os03g03900/LOC_Os03g03920/LOC_Os03g11680/LOC_Os03g59610/LOC_Os03g62790/LOC_Os04g31340/LOC_Os04g32480/LOC_Os04g51130/LOC_Os05g37190/LOC_Os06g42824/LOC_Os07g04730/LOC_Os07g05830/LOC_Os07g48900/LOC_Os08g13130/LOC_Os09g25550/LOC_Os09g35620/LOC_Os10g25300/LOC_Os11g04600/LOC_Os11g05470/LOC_Os11g47910/LOC_Os12g…	27
GO:0042744	hydrogen peroxide catabolic process	26/1602	143/15655	1.78	0.00261676	0.245467	LOC_Os01g16450/LOC_Os01g57730/LOC_Os01g73200/LOC_Os02g02400/LOC_Os02g14430/LOC_Os03g13180/LOC_Os03g55410/LOC_Os04g39100/LOC_Os04g53640/LOC_Os04g59150/LOC_Os04g59200/LOC_Os04g59210/LOC_Os05g04490/LOC_Os06g13050/LOC_Os06g32990/LOC_Os06g33100/LOC_Os06g35520/LOC_Os06g48030/LOC_Os07g48010/LOC_Os07g48030/LOC_Os07g48050/LOC_Os08g02110/LOC_Os09g32964/LOC_Os10g02070/LOC_Os11g02100/LOC_Os12g02080	26
GO:0051171	regulation of nitrogen compound metabolic process	26/1602	321/15655	0.79	0.917953	0.953133	LOC_Os01g67850/LOC_Os01g73280/LOC_Os02g31160/LOC_Os02g45760/LOC_Os02g51350/LOC_Os02g53530/LOC_Os03g03900/LOC_Os03g03920/LOC_Os03g11680/LOC_Os03g58040/LOC_Os03g62790/LOC_Os04g31340/LOC_Os04g32480/LOC_Os04g51130/LOC_Os05g37190/LOC_Os06g42824/LOC_Os07g05830/LOC_Os07g48900/LOC_Os08g13130/LOC_Os09g25550/LOC_Os09g35620/LOC_Os10g25300/LOC_Os11g04600/LOC_Os11g05470/LOC_Os11g47910/LOC_Os12g04410	26
GO:0090304	nucleic acid metabolic process	26/1602	341/15655	0.75	0.959749	0.981146	LOC_Os01g04200/LOC_Os01g07260/LOC_Os01g08880/LOC_Os01g36600/LOC_Os01g37870/LOC_Os01g55290/LOC_Os01g67850/LOC_Os01g73280/LOC_Os01g73950/LOC_Os02g42210/LOC_Os02g52220/LOC_Os02g55310/LOC_Os03g53170/LOC_Os04g28310/LOC_Os04g48370/LOC_Os04g52725/LOC_Os04g55090/LOC_Os04g58970/LOC_Os05g04160/LOC_Os05g28040/LOC_Os06g08570/LOC_Os09g25550/LOC_Os10g25300/LOC_Os11g39710/LOC_Os11g43800/LOC_Os12g42120	26
GO:0071840	cellular component organization or biogenesis	26/1602	349/15655	0.73	0.970383	0.988189	LOC_Os01g07260/LOC_Os01g08880/LOC_Os01g42090/LOC_Os01g67850/LOC_Os01g73280/LOC_Os01g73560/LOC_Os02g53530/LOC_Os02g57120/LOC_Os03g03920/LOC_Os03g11680/LOC_Os03g18200/LOC_Os03g23050/LOC_Os04g33770/LOC_Os06g11990/LOC_Os06g42824/LOC_Os06g46754/LOC_Os07g05470/LOC_Os07g07760/LOC_Os09g35620/LOC_Os10g03400/LOC_Os10g10580/LOC_Os10g25300/LOC_Os11g29350/LOC_Os12g40260/Oryza_sativa_newGene_3279/Oryza_sativa_…	26
GO:0006796	phosphate-containing compound metabolic process	26/1602	428/15655	0.59	0.999201	0.995083	LOC_Os01g01860/LOC_Os01g08760/LOC_Os01g08880/LOC_Os01g22740/LOC_Os01g24620/LOC_Os01g57520/LOC_Os02g51410/LOC_Os02g57400/LOC_Os03g13690/LOC_Os03g38560/LOC_Os03g46230/LOC_Os03g52820/LOC_Os04g54800/LOC_Os05g02310/LOC_Os05g16130/LOC_Os05g36260/LOC_Os06g12150/LOC_Os06g16300/LOC_Os06g39940/LOC_Os06g45260/LOC_Os07g10060/LOC_Os07g20200/LOC_Os08g19360/LOC_Os09g39310/LOC_Os12g04040/LOC_Os12g40260	26
GO:0036211	protein modification process	26/1602	554/15655	0.46	1	0.995083	LOC_Os01g01860/LOC_Os01g08880/LOC_Os01g22740/LOC_Os01g24620/LOC_Os01g57520/LOC_Os01g67850/LOC_Os01g74320/LOC_Os02g52130/LOC_Os03g23050/LOC_Os03g38560/LOC_Os03g46230/LOC_Os03g52820/LOC_Os04g01160/LOC_Os05g16130/LOC_Os06g11990/LOC_Os06g16300/LOC_Os06g39940/LOC_Os06g45260/LOC_Os07g07820/LOC_Os07g10060/LOC_Os07g20200/LOC_Os08g04130/LOC_Os08g19360/LOC_Os09g39310/LOC_Os12g04040/LOC_Os12g40260	26
GO:0006464	cellular protein modification process	26/1602	564/15655	0.45	1	0.995083	LOC_Os01g01860/LOC_Os01g08880/LOC_Os01g22740/LOC_Os01g24620/LOC_Os01g57520/LOC_Os01g67850/LOC_Os01g74320/LOC_Os02g52130/LOC_Os03g23050/LOC_Os03g38560/LOC_Os03g46230/LOC_Os03g52820/LOC_Os04g01160/LOC_Os05g16130/LOC_Os06g11990/LOC_Os06g16300/LOC_Os06g39940/LOC_Os06g45260/LOC_Os07g07820/LOC_Os07g10060/LOC_Os07g20200/LOC_Os08g04130/LOC_Os08g19360/LOC_Os09g39310/LOC_Os12g04040/LOC_Os12g40260	26
GO:0023052	signaling	25/1602	461/15655	0.53	0.999936	0.995083	LOC_Os01g01860/LOC_Os01g22740/LOC_Os01g24620/LOC_Os02g53530/LOC_Os03g11680/LOC_Os03g38560/LOC_Os03g46230/LOC_Os03g52820/LOC_Os03g59610/LOC_Os03g62790/LOC_Os05g16130/LOC_Os05g50990/LOC_Os06g16300/LOC_Os06g39940/LOC_Os06g45260/LOC_Os07g10060/LOC_Os07g20200/LOC_Os08g04130/LOC_Os08g19360/LOC_Os09g35620/LOC_Os09g39310/LOC_Os11g04600/LOC_Os12g04040/LOC_Os12g04410/LOC_Os12g08670	25
GO:0015979	photosynthesis	24/1602	97/15655	2.42	3.15786e-05	0.00855762	LOC_Os01g17170/LOC_Os01g57942/LOC_Os01g59090/LOC_Os01g71190/LOC_Os02g05830/LOC_Os02g24642/LOC_Os02g36850/LOC_Os03g22370/LOC_Os03g56670/LOC_Os04g16866/LOC_Os04g58200/LOC_Os05g01675/LOC_Os05g43310/LOC_Os07g04840/LOC_Os07g05360/LOC_Os07g25430/LOC_Os08g40160/LOC_Os10g32400/LOC_Os10g35370/LOC_Os10g38216/LOC_Os10g38234/LOC_Os12g08770/LOC_Os12g17600/LOC_Os12g19470	24
GO:0032259	methylation	24/1602	161/15655	1.46	0.0383344	0.33101	LOC_Os01g44050/LOC_Os01g50610/LOC_Os02g48770/LOC_Os03g12110/LOC_Os03g56370/LOC_Os04g01470/LOC_Os04g09604/LOC_Os04g11970/LOC_Os04g14150/LOC_Os05g01470/LOC_Os06g13390/LOC_Os06g13560/LOC_Os06g16960/LOC_Os07g28040/LOC_Os07g29220/LOC_Os09g24900/LOC_Os10g25300/LOC_Os10g36690/LOC_Os10g37770/LOC_Os11g15040/LOC_Os11g26150/LOC_Os12g10140/LOC_Os12g13800/LOC_Os12g13810	24
GO:1901700	response to oxygen-containing compound	24/1602	184/15655	1.27	0.128032	0.386464	LOC_Os01g25500/LOC_Os02g11720/LOC_Os02g43770/LOC_Os02g51710/LOC_Os02g52130/LOC_Os02g53530/LOC_Os03g11680/LOC_Os03g57200/LOC_Os03g59610/LOC_Os03g60220/LOC_Os03g62790/LOC_Os05g50990/LOC_Os06g11990/LOC_Os06g13060/LOC_Os06g30370/LOC_Os07g49114/LOC_Os08g04130/LOC_Os09g35620/LOC_Os09g39310/LOC_Os10g10580/LOC_Os11g04600/LOC_Os11g05470/LOC_Os12g04410/LOC_Os12g41590	24
GO:0016043	cellular component organization	24/1602	332/15655	0.71	0.976769	0.992272	LOC_Os01g07260/LOC_Os01g08880/LOC_Os01g42090/LOC_Os01g67850/LOC_Os01g73280/LOC_Os01g73560/LOC_Os02g53530/LOC_Os02g57120/LOC_Os03g03920/LOC_Os03g11680/LOC_Os03g18200/LOC_Os03g23050/LOC_Os04g33770/LOC_Os06g11990/LOC_Os06g42824/LOC_Os06g46754/LOC_Os07g05470/LOC_Os09g35620/LOC_Os10g03400/LOC_Os10g10580/LOC_Os11g29350/LOC_Os12g40260/Oryza_sativa_newGene_3279/Oryza_sativa_newGene_3643	24
GO:0006793	phosphorus metabolic process	24/1602	422/15655	0.56	0.999718	0.995083	LOC_Os01g01860/LOC_Os01g08760/LOC_Os01g08880/LOC_Os01g22740/LOC_Os01g24620/LOC_Os01g57520/LOC_Os02g51410/LOC_Os02g57400/LOC_Os03g13690/LOC_Os03g38560/LOC_Os03g46230/LOC_Os03g52820/LOC_Os04g54800/LOC_Os05g16130/LOC_Os06g12150/LOC_Os06g16300/LOC_Os06g39940/LOC_Os06g45260/LOC_Os07g10060/LOC_Os07g20200/LOC_Os08g19360/LOC_Os09g39310/LOC_Os12g04040/LOC_Os12g40260	24
GO:0030001	metal ion transport	23/1602	88/15655	2.55	1.77644e-05	0.00541579	LOC_Os01g09660/LOC_Os01g32330/LOC_Os01g61070/LOC_Os01g74490/LOC_Os02g32814/LOC_Os02g37290/LOC_Os02g37300/LOC_Os02g37320/LOC_Os03g02070/LOC_Os03g25610/LOC_Os03g54050/LOC_Os04g17100/LOC_Os04g46940/LOC_Os06g35060/LOC_Os06g45500/LOC_Os06g48720/LOC_Os08g10480/LOC_Os08g31140/LOC_Os09g09930/LOC_Os10g36200/LOC_Os10g38870/LOC_Os12g23280/Oryza_sativa_newGene_11	23
GO:0055114	oxidation-reduction process	23/1602	120/15655	1.87	0.0022395	0.227584	LOC_Os01g25500/LOC_Os01g44050/LOC_Os01g58194/LOC_Os02g42810/LOC_Os02g53400/LOC_Os03g02600/LOC_Os03g08999/LOC_Os03g17600/LOC_Os03g18200/LOC_Os03g58040/LOC_Os03g59610/LOC_Os04g09810/LOC_Os04g17660/LOC_Os04g44980/LOC_Os05g01120/LOC_Os06g21550/LOC_Os10g38900/LOC_Os10g38930/LOC_Os12g12514/LOC_Os12g16220/LOC_Os12g16240/LOC_Os12g16250/LOC_Os12g41590	23
GO:0009605	response to external stimulus	23/1602	152/15655	1.48	0.0361475	0.33101	LOC_Os01g01650/LOC_Os01g25360/LOC_Os01g37650/LOC_Os01g73280/LOC_Os01g74320/LOC_Os02g31160/LOC_Os02g39280/LOC_Os03g23050/LOC_Os03g57200/LOC_Os03g58040/LOC_Os03g60220/LOC_Os03g62790/LOC_Os04g01160/LOC_Os04g34670/LOC_Os06g11990/LOC_Os06g16300/LOC_Os06g20440/LOC_Os07g04730/LOC_Os07g49114/LOC_Os08g04130/LOC_Os09g35620/LOC_Os11g04600/LOC_Os12g04410	23
GO:0000003	reproduction	23/1602	176/15655	1.28	0.132008	0.397482	LOC_Os01g67850/LOC_Os01g73560/LOC_Os02g56820/LOC_Os03g18200/LOC_Os03g23050/LOC_Os04g34670/LOC_Os05g05600/LOC_Os05g32070/LOC_Os06g11990/LOC_Os06g20440/LOC_Os06g46754/LOC_Os07g05470/LOC_Os09g33850/LOC_Os09g35620/LOC_Os10g03400/LOC_Os11g04600/LOC_Os11g43800/LOC_Os12g04410/LOC_Os12g16290/LOC_Os12g40260/LOC_Os12g42120/Oryza_sativa_newGene_3643/Oryza_sativa_newGene_3675	23
GO:0022414	reproductive process	23/1602	176/15655	1.28	0.132008	0.397482	LOC_Os01g67850/LOC_Os01g73560/LOC_Os02g56820/LOC_Os03g18200/LOC_Os03g23050/LOC_Os04g34670/LOC_Os05g05600/LOC_Os05g32070/LOC_Os06g11990/LOC_Os06g20440/LOC_Os06g46754/LOC_Os07g05470/LOC_Os09g33850/LOC_Os09g35620/LOC_Os10g03400/LOC_Os11g04600/LOC_Os11g43800/LOC_Os12g04410/LOC_Os12g16290/LOC_Os12g40260/LOC_Os12g42120/Oryza_sativa_newGene_3643/Oryza_sativa_newGene_3675	23
GO:0006281	DNA repair	23/1602	201/15655	1.12	0.316943	0.558531	LOC_Os01g07260/LOC_Os01g07990/LOC_Os01g12340/LOC_Os01g14770/LOC_Os01g16130/LOC_Os01g43980/LOC_Os01g43990/LOC_Os01g53940/LOC_Os01g67850/LOC_Os01g73280/LOC_Os02g47605/LOC_Os03g08400/LOC_Os04g51490/LOC_Os06g45320/LOC_Os06g45330/LOC_Os07g15160/LOC_Os08g01130/LOC_Os08g02000/LOC_Os08g34850/LOC_Os08g41070/LOC_Os09g25550/LOC_Os10g24940/Oryza_sativa_newGene_1533	23
GO:0048519	negative regulation of biological process	23/1602	203/15655	1.11	0.334503	0.567741	LOC_Os01g08880/LOC_Os01g67850/LOC_Os01g73280/LOC_Os02g31160/LOC_Os02g52130/LOC_Os02g53530/LOC_Os02g57120/LOC_Os03g03920/LOC_Os03g11680/LOC_Os03g23050/LOC_Os03g62790/LOC_Os04g32480/LOC_Os04g48370/LOC_Os06g11990/LOC_Os06g16300/LOC_Os07g05830/LOC_Os08g04130/LOC_Os09g35620/LOC_Os09g39310/LOC_Os11g05470/LOC_Os11g29350/LOC_Os12g08670/LOC_Os12g16290	23
GO:0009451	RNA modification	23/1602	297/15655	0.76	0.94111	0.967264	LOC_Os01g25270/LOC_Os01g36600/LOC_Os01g37870/LOC_Os01g55290/LOC_Os01g73950/LOC_Os02g42210/LOC_Os02g52220/LOC_Os02g55310/LOC_Os03g32620/LOC_Os03g53170/LOC_Os04g14450/LOC_Os04g28310/LOC_Os04g52725/LOC_Os04g55090/LOC_Os04g58970/LOC_Os05g04160/LOC_Os05g33920/LOC_Os06g08570/LOC_Os10g25300/LOC_Os11g43800/LOC_Os11g43934/LOC_Os12g08140/LOC_Os12g42120	23
GO:0016310	phosphorylation	23/1602	411/15655	0.55	0.999747	0.995083	LOC_Os01g01860/LOC_Os01g08760/LOC_Os01g08880/LOC_Os01g22740/LOC_Os01g24620/LOC_Os01g57520/LOC_Os02g51410/LOC_Os03g13690/LOC_Os03g38560/LOC_Os03g46230/LOC_Os03g52820/LOC_Os04g54800/LOC_Os05g16130/LOC_Os06g12150/LOC_Os06g16300/LOC_Os06g39940/LOC_Os06g45260/LOC_Os07g10060/LOC_Os07g20200/LOC_Os08g19360/LOC_Os09g39310/LOC_Os12g04040/LOC_Os12g40260	23
GO:0016070	RNA metabolic process	22/1602	309/15655	0.7	0.977052	0.992272	LOC_Os01g04200/LOC_Os01g36600/LOC_Os01g37870/LOC_Os01g55290/LOC_Os01g73280/LOC_Os01g73950/LOC_Os02g42210/LOC_Os02g52220/LOC_Os02g55310/LOC_Os03g53170/LOC_Os04g28310/LOC_Os04g48370/LOC_Os04g52725/LOC_Os04g55090/LOC_Os04g58970/LOC_Os05g04160/LOC_Os05g28040/LOC_Os06g08570/LOC_Os10g25300/LOC_Os11g39710/LOC_Os11g43800/LOC_Os12g42120	22
GO:0031323	regulation of cellular metabolic process	22/1602	324/15655	0.66	0.988207	0.995083	LOC_Os01g67850/LOC_Os01g73280/LOC_Os02g31160/LOC_Os02g45760/LOC_Os02g53530/LOC_Os03g03900/LOC_Os03g03920/LOC_Os03g11680/LOC_Os03g59610/LOC_Os03g62790/LOC_Os04g31340/LOC_Os04g32480/LOC_Os04g51130/LOC_Os05g37190/LOC_Os06g42824/LOC_Os07g05830/LOC_Os07g48900/LOC_Os09g25550/LOC_Os09g35620/LOC_Os10g25300/LOC_Os11g05470/LOC_Os11g47910	22
GO:0007166	cell surface receptor signaling pathway	21/1602	73/15655	2.81	8.20147e-06	0.00285756	LOC_Os01g04409/LOC_Os02g56370/LOC_Os03g06120/LOC_Os03g62430/LOC_Os04g29770/LOC_Os04g30240/LOC_Os04g51050/LOC_Os06g16300/LOC_Os08g25430/LOC_Os08g28710/LOC_Os09g35620/LOC_Os11g35220/LOC_Os11g44300/LOC_Os11g44380/LOC_Os11g44430/LOC_Os11g44500/LOC_Os11g44560/LOC_Os11g44870/LOC_Os11g47140/LOC_Os12g14520/LOC_Os12g40419	21
GO:0015031	protein transport	21/1602	211/15655	0.97	0.58768	0.727204	LOC_Os01g73280/LOC_Os02g36619/LOC_Os02g47010/LOC_Os02g56570/LOC_Os03g15230/LOC_Os03g17410/LOC_Os03g37570/LOC_Os03g63250/LOC_Os04g58870/LOC_Os05g24580/LOC_Os05g30700/LOC_Os06g08460/LOC_Os06g11020/LOC_Os07g10940/LOC_Os07g16970/LOC_Os07g38990/LOC_Os07g47400/LOC_Os09g17810/LOC_Os11g01050/LOC_Os11g05470/LOC_Os11g05880	21
GO:0009607	response to biotic stimulus	20/1602	106/15655	1.84	0.00504105	0.33101	LOC_Os01g25360/LOC_Os01g37650/LOC_Os01g73280/LOC_Os01g74320/LOC_Os02g10350/LOC_Os02g31160/LOC_Os02g39280/LOC_Os03g23050/LOC_Os03g60220/LOC_Os03g62790/LOC_Os06g11990/LOC_Os06g16300/LOC_Os06g29110/LOC_Os07g04730/LOC_Os07g49114/LOC_Os08g04130/LOC_Os09g35620/LOC_Os10g39520/LOC_Os11g04600/LOC_Os12g04410	20
GO:0001101	response to acid chemical	19/1602	133/15655	1.4	0.0844323	0.33101	LOC_Os01g25500/LOC_Os02g43770/LOC_Os02g51710/LOC_Os02g52130/LOC_Os02g53530/LOC_Os03g11680/LOC_Os03g57200/LOC_Os03g59610/LOC_Os03g60220/LOC_Os03g62790/LOC_Os05g50990/LOC_Os06g11990/LOC_Os06g13060/LOC_Os06g30370/LOC_Os07g49114/LOC_Os08g04130/LOC_Os10g10580/LOC_Os11g04600/LOC_Os12g04410	19
GO:0070887	cellular response to chemical stimulus	19/1602	137/15655	1.36	0.105444	0.338161	LOC_Os01g58194/LOC_Os01g73280/LOC_Os02g43770/LOC_Os02g53400/LOC_Os02g53530/LOC_Os03g03920/LOC_Os03g11680/LOC_Os03g57200/LOC_Os03g59610/LOC_Os03g62790/LOC_Os04g48370/LOC_Os05g05600/LOC_Os05g50990/LOC_Os08g04130/LOC_Os09g35620/LOC_Os09g39310/LOC_Os11g04600/LOC_Os12g04410/LOC_Os12g41590	19
GO:0048583	regulation of response to stimulus	19/1602	148/15655	1.25	0.178455	0.424026	LOC_Os01g67850/LOC_Os01g73280/LOC_Os02g31160/LOC_Os02g53530/LOC_Os03g03920/LOC_Os03g11680/LOC_Os03g57200/LOC_Os04g32480/LOC_Os05g50990/LOC_Os06g11990/LOC_Os07g05830/LOC_Os07g07820/LOC_Os08g04130/LOC_Os09g35620/LOC_Os09g39310/LOC_Os10g38930/LOC_Os11g04600/LOC_Os12g04410/LOC_Os12g08670	19
GO:0009725	response to hormone	19/1602	166/15655	1.12	0.338102	0.567741	LOC_Os01g55940/LOC_Os02g52130/LOC_Os02g53530/LOC_Os03g11680/LOC_Os03g57200/LOC_Os03g60220/LOC_Os03g62790/LOC_Os05g32070/LOC_Os05g50990/LOC_Os06g13060/LOC_Os06g30370/LOC_Os07g05470/LOC_Os08g04130/LOC_Os09g35620/LOC_Os09g39310/LOC_Os10g10580/LOC_Os11g04600/LOC_Os12g04410/Oryza_sativa_newGene_3643	19
GO:0009719	response to endogenous stimulus	19/1602	168/15655	1.11	0.357881	0.577283	LOC_Os01g55940/LOC_Os02g52130/LOC_Os02g53530/LOC_Os03g11680/LOC_Os03g57200/LOC_Os03g60220/LOC_Os03g62790/LOC_Os05g32070/LOC_Os05g50990/LOC_Os06g13060/LOC_Os06g30370/LOC_Os07g05470/LOC_Os08g04130/LOC_Os09g35620/LOC_Os09g39310/LOC_Os10g10580/LOC_Os11g04600/LOC_Os12g04410/Oryza_sativa_newGene_3643	19
GO:0048731	system development	19/1602	198/15655	0.94	0.651688	0.772093	LOC_Os01g67850/LOC_Os02g56820/LOC_Os03g53990/LOC_Os04g01160/LOC_Os05g05600/LOC_Os05g32070/LOC_Os06g11990/LOC_Os07g05470/LOC_Os07g49114/LOC_Os09g33850/LOC_Os09g35620/LOC_Os10g10580/LOC_Os11g04600/LOC_Os11g43800/LOC_Os12g04410/LOC_Os12g42120/Oryza_sativa_newGene_3279/Oryza_sativa_newGene_3643/Oryza_sativa_newGene_3675	19
GO:0009889	regulation of biosynthetic process	19/1602	275/15655	0.68	0.978369	0.992591	LOC_Os01g67850/LOC_Os01g73280/LOC_Os02g31160/LOC_Os02g45760/LOC_Os02g53530/LOC_Os03g03900/LOC_Os03g11680/LOC_Os03g59610/LOC_Os04g32480/LOC_Os04g51130/LOC_Os05g37190/LOC_Os07g04730/LOC_Os07g05830/LOC_Os07g48900/LOC_Os09g25550/LOC_Os09g35620/LOC_Os10g25300/LOC_Os11g05470/LOC_Os11g47910	19
GO:0003006	developmental process involved in reproduction	18/1602	147/15655	1.2	0.244628	0.503188	LOC_Os01g67850/LOC_Os02g56820/LOC_Os03g18200/LOC_Os04g34670/LOC_Os05g05600/LOC_Os05g32070/LOC_Os06g11990/LOC_Os06g20440/LOC_Os06g46754/LOC_Os09g33850/LOC_Os09g35620/LOC_Os10g03400/LOC_Os11g04600/LOC_Os11g43800/LOC_Os12g04410/LOC_Os12g16290/LOC_Os12g42120/Oryza_sativa_newGene_3675	18
GO:1901576	organic substance biosynthetic process	18/1602	148/15655	1.19	0.25379	0.503188	LOC_Os01g07260/LOC_Os01g08760/LOC_Os01g08880/LOC_Os01g73280/LOC_Os02g51410/LOC_Os02g57400/LOC_Os03g59610/LOC_Os04g54800/LOC_Os05g28040/LOC_Os05g37190/LOC_Os06g11990/LOC_Os06g12150/LOC_Os07g07760/LOC_Os09g39310/LOC_Os11g39710/LOC_Os12g16220/LOC_Os12g16240/LOC_Os12g16250	18
GO:0009628	response to abiotic stimulus	18/1602	195/15655	0.9	0.713235	0.815156	LOC_Os01g55940/LOC_Os01g67850/LOC_Os02g51710/LOC_Os03g03920/LOC_Os03g18200/LOC_Os03g57200/LOC_Os03g58040/LOC_Os03g59610/LOC_Os03g62790/LOC_Os04g01160/LOC_Os05g28040/LOC_Os05g50990/LOC_Os06g11990/LOC_Os07g04730/LOC_Os07g33350/LOC_Os09g33850/LOC_Os09g35620/LOC_Os09g39310	18
GO:0006511	ubiquitin-dependent protein catabolic process	18/1602	248/15655	0.71	0.957441	0.979508	LOC_Os01g27160/LOC_Os01g67850/LOC_Os01g73280/LOC_Os02g09820/LOC_Os02g35440/LOC_Os02g51350/LOC_Os02g52130/LOC_Os02g55540/LOC_Os03g03920/LOC_Os03g24040/LOC_Os04g46190/LOC_Os05g45040/LOC_Os06g42824/LOC_Os07g28590/LOC_Os08g13130/LOC_Os09g06740/LOC_Os11g04600/LOC_Os12g04410	18
GO:0090305	nucleic acid phosphodiester bond hydrolysis	18/1602	251/15655	0.7	0.962639	0.983176	LOC_Os01g04200/LOC_Os01g36600/LOC_Os01g37870/LOC_Os01g55290/LOC_Os01g73950/LOC_Os02g42210/LOC_Os02g52220/LOC_Os02g55310/LOC_Os03g53170/LOC_Os04g28310/LOC_Os04g52725/LOC_Os04g55090/LOC_Os04g58970/LOC_Os05g04160/LOC_Os06g08570/LOC_Os11g39710/LOC_Os11g43800/LOC_Os12g42120	18
GO:0031326	regulation of cellular biosynthetic process	18/1602	267/15655	0.66	0.98199	0.993373	LOC_Os01g67850/LOC_Os01g73280/LOC_Os02g31160/LOC_Os02g45760/LOC_Os02g53530/LOC_Os03g03900/LOC_Os03g11680/LOC_Os03g59610/LOC_Os04g32480/LOC_Os04g51130/LOC_Os05g37190/LOC_Os07g05830/LOC_Os07g48900/LOC_Os09g25550/LOC_Os09g35620/LOC_Os10g25300/LOC_Os11g05470/LOC_Os11g47910	18
GO:0010468	regulation of gene expression	18/1602	289/15655	0.61	0.993959	0.995083	LOC_Os01g67850/LOC_Os02g31160/LOC_Os02g45760/LOC_Os02g52130/LOC_Os02g53530/LOC_Os03g03900/LOC_Os03g11680/LOC_Os03g23050/LOC_Os04g48370/LOC_Os04g51130/LOC_Os05g37190/LOC_Os07g48900/LOC_Os09g25550/LOC_Os09g35620/LOC_Os10g25300/LOC_Os10g27470/LOC_Os11g47910/LOC_Os12g16290	18
GO:0035556	intracellular signal transduction	18/1602	410/15655	0.43	0.999996	0.995083	LOC_Os01g01860/LOC_Os01g22740/LOC_Os01g24620/LOC_Os03g18010/LOC_Os03g38560/LOC_Os03g46230/LOC_Os03g52820/LOC_Os04g43710/LOC_Os05g16130/LOC_Os06g39940/LOC_Os06g45260/LOC_Os07g10060/LOC_Os07g20200/LOC_Os07g42070/LOC_Os08g19360/LOC_Os09g35620/LOC_Os12g04040/LOC_Os12g08670	18
GO:0018298	protein-chromophore linkage	17/1602	31/15655	5.36	8.90983e-10	5.43265e-07	LOC_Os01g41710/LOC_Os02g10390/LOC_Os02g24632/LOC_Os03g39610/LOC_Os04g16770/LOC_Os04g16872/LOC_Os04g16874/LOC_Os05g01675/LOC_Os06g21590/LOC_Os06g39708/LOC_Os07g38960/LOC_Os08g33820/LOC_Os08g35420/LOC_Os09g17740/LOC_Os10g21212/LOC_Os10g41689/LOC_Os11g13890	17
GO:0006520	cellular amino acid metabolic process	17/1602	43/15655	3.86	4.2623e-07	0.00020791	LOC_Os01g56380/LOC_Os02g14110/LOC_Os02g19924/LOC_Os02g19970/LOC_Os02g43470/LOC_Os02g51410/LOC_Os03g56420/LOC_Os03g58040/LOC_Os03g59610/LOC_Os04g45970/LOC_Os04g54800/LOC_Os06g12150/LOC_Os06g23684/LOC_Os08g04560/LOC_Os08g15030/LOC_Os10g23900/LOC_Os11g42510	17
GO:0043207	response to external biotic stimulus	17/1602	97/15655	1.71	0.0187902	0.33101	LOC_Os01g25360/LOC_Os01g37650/LOC_Os01g73280/LOC_Os01g74320/LOC_Os02g31160/LOC_Os02g39280/LOC_Os03g23050/LOC_Os03g60220/LOC_Os03g62790/LOC_Os06g11990/LOC_Os06g16300/LOC_Os07g04730/LOC_Os07g49114/LOC_Os08g04130/LOC_Os09g35620/LOC_Os11g04600/LOC_Os12g04410	17
GO:0051707	response to other organism	17/1602	97/15655	1.71	0.0187902	0.33101	LOC_Os01g25360/LOC_Os01g37650/LOC_Os01g73280/LOC_Os01g74320/LOC_Os02g31160/LOC_Os02g39280/LOC_Os03g23050/LOC_Os03g60220/LOC_Os03g62790/LOC_Os06g11990/LOC_Os06g16300/LOC_Os07g04730/LOC_Os07g49114/LOC_Os08g04130/LOC_Os09g35620/LOC_Os11g04600/LOC_Os12g04410	17
GO:0055085	transmembrane transport	17/1602	138/15655	1.2	0.244699	0.503188	LOC_Os01g12680/LOC_Os01g42090/LOC_Os01g43460/LOC_Os01g58860/LOC_Os02g04630/LOC_Os02g14980/LOC_Os02g43370/LOC_Os03g64200/LOC_Os04g45860/LOC_Os04g47320/LOC_Os04g57840/LOC_Os04g58470/LOC_Os08g45030/LOC_Os10g31040/LOC_Os10g39980/LOC_Os12g13730/LOC_Os12g42910	17
GO:0009653	anatomical structure morphogenesis	17/1602	139/15655	1.2	0.254166	0.503188	LOC_Os01g42090/LOC_Os02g53530/LOC_Os02g57120/LOC_Os03g11680/LOC_Os03g18200/LOC_Os03g53990/LOC_Os05g28040/LOC_Os06g11990/LOC_Os06g46754/LOC_Os07g05470/LOC_Os09g35620/LOC_Os10g03400/LOC_Os10g10580/LOC_Os11g04600/LOC_Os12g04410/Oryza_sativa_newGene_3279/Oryza_sativa_newGene_3643	17
GO:0019219	regulation of nucleobase-containing compound metabolic process	17/1602	226/15655	0.74	0.933774	0.961751	LOC_Os01g67850/LOC_Os01g73280/LOC_Os02g31160/LOC_Os02g45760/LOC_Os02g53530/LOC_Os03g03900/LOC_Os03g11680/LOC_Os04g32480/LOC_Os04g51130/LOC_Os05g37190/LOC_Os07g05830/LOC_Os07g48900/LOC_Os09g25550/LOC_Os09g35620/LOC_Os10g25300/LOC_Os11g05470/LOC_Os11g47910	17
GO:0006996	organelle organization	17/1602	227/15655	0.73	0.936466	0.964116	LOC_Os01g07260/LOC_Os01g08880/LOC_Os01g67850/LOC_Os01g73280/LOC_Os01g73560/LOC_Os02g57120/LOC_Os03g03920/LOC_Os03g23050/LOC_Os04g33770/LOC_Os06g11990/LOC_Os06g42824/LOC_Os07g05470/LOC_Os09g35620/LOC_Os10g03400/LOC_Os10g10580/LOC_Os12g40260/Oryza_sativa_newGene_3643	17
GO:0051252	regulation of RNA metabolic process	17/1602	231/15655	0.72	0.946323	0.970985	LOC_Os01g67850/LOC_Os02g31160/LOC_Os02g45760/LOC_Os02g52450/LOC_Os02g53530/LOC_Os03g03900/LOC_Os03g11680/LOC_Os04g32480/LOC_Os04g51130/LOC_Os05g37190/LOC_Os07g05830/LOC_Os07g48900/LOC_Os09g25550/LOC_Os09g35620/LOC_Os10g25300/LOC_Os11g05470/LOC_Os11g47910	17
GO:0010556	regulation of macromolecule biosynthetic process	17/1602	253/15655	0.66	0.980213	0.993373	LOC_Os01g67850/LOC_Os01g73280/LOC_Os02g31160/LOC_Os02g45760/LOC_Os02g53530/LOC_Os03g03900/LOC_Os03g11680/LOC_Os04g32480/LOC_Os04g51130/LOC_Os05g37190/LOC_Os07g05830/LOC_Os07g48900/LOC_Os09g25550/LOC_Os09g35620/LOC_Os10g25300/LOC_Os11g05470/LOC_Os11g47910	17
GO:0042742	defense response to bacterium	16/1602	72/15655	2.17	0.00215416	0.227584	LOC_Os01g74320/LOC_Os02g02930/LOC_Os03g62790/LOC_Os06g11990/LOC_Os07g03790/LOC_Os07g47590/LOC_Os08g03240/LOC_Os08g04130/LOC_Os09g16950/LOC_Os09g35620/LOC_Os10g30540/LOC_Os11g04600/LOC_Os11g37940/LOC_Os11g37950/LOC_Os11g37970/LOC_Os12g04410	16
GO:0051603	proteolysis involved in cellular protein catabolic process	16/1602	122/15655	1.28	0.180655	0.424026	LOC_Os01g24560/LOC_Os01g42790/LOC_Os01g67850/LOC_Os01g73280/LOC_Os02g42310/LOC_Os02g51350/LOC_Os02g52130/LOC_Os03g03920/LOC_Os04g13140/LOC_Os05g45040/LOC_Os06g42824/LOC_Os08g13130/LOC_Os08g41730/LOC_Os11g04600/LOC_Os11g23770/LOC_Os12g04410	16
GO:0044249	cellular biosynthetic process	16/1602	141/15655	1.11	0.369972	0.592797	LOC_Os01g07260/LOC_Os01g08760/LOC_Os01g08880/LOC_Os01g73280/LOC_Os02g51410/LOC_Os03g59610/LOC_Os04g54800/LOC_Os05g28040/LOC_Os06g11990/LOC_Os06g12150/LOC_Os07g07760/LOC_Os09g39310/LOC_Os11g39710/LOC_Os12g16220/LOC_Os12g16240/LOC_Os12g16250	16
GO:0048523	negative regulation of cellular process	16/1602	159/15655	0.98	0.567232	0.719812	LOC_Os01g08880/LOC_Os01g67850/LOC_Os01g73280/LOC_Os02g31160/LOC_Os02g53530/LOC_Os02g57120/LOC_Os03g11680/LOC_Os03g62790/LOC_Os04g32480/LOC_Os06g11990/LOC_Os07g05830/LOC_Os09g35620/LOC_Os09g39310/LOC_Os11g05470/LOC_Os11g29350/LOC_Os12g08670	16
GO:0009056	catabolic process	16/1602	188/15655	0.83	0.81596	0.878624	LOC_Os01g67850/LOC_Os01g73280/LOC_Os02g51350/LOC_Os02g52130/LOC_Os03g03920/LOC_Os03g14730/LOC_Os03g57200/LOC_Os05g33940/LOC_Os05g45040/LOC_Os06g42824/LOC_Os07g44890/LOC_Os08g13130/LOC_Os09g39440/LOC_Os11g04600/LOC_Os12g04410/LOC_Os12g15400	16
GO:0051179	localization	16/1602	191/15655	0.82	0.834268	0.892819	LOC_Os01g42090/LOC_Os01g73280/LOC_Os02g43770/LOC_Os02g56570/LOC_Os03g53990/LOC_Os06g11990/LOC_Os06g16300/LOC_Os07g47400/LOC_Os09g09930/LOC_Os09g35620/LOC_Os10g03400/LOC_Os10g10580/LOC_Os11g05470/LOC_Os11g29350/LOC_Os12g13730/LOC_Os12g16290	16
GO:1903506	regulation of nucleic acid-templated transcription	16/1602	212/15655	0.74	0.926326	0.95772	LOC_Os01g67850/LOC_Os02g31160/LOC_Os02g45760/LOC_Os02g53530/LOC_Os03g03900/LOC_Os03g11680/LOC_Os04g32480/LOC_Os04g51130/LOC_Os05g37190/LOC_Os07g05830/LOC_Os07g48900/LOC_Os09g25550/LOC_Os09g35620/LOC_Os10g25300/LOC_Os11g05470/LOC_Os11g47910	16
GO:2001141	regulation of RNA biosynthetic process	16/1602	212/15655	0.74	0.926326	0.95772	LOC_Os01g67850/LOC_Os02g31160/LOC_Os02g45760/LOC_Os02g53530/LOC_Os03g03900/LOC_Os03g11680/LOC_Os04g32480/LOC_Os04g51130/LOC_Os05g37190/LOC_Os07g05830/LOC_Os07g48900/LOC_Os09g25550/LOC_Os09g35620/LOC_Os10g25300/LOC_Os11g05470/LOC_Os11g47910	16
GO:0098542	defense response to other organism	15/1602	61/15655	2.4	0.000991569	0.130141	LOC_Os01g25360/LOC_Os01g37650/LOC_Os01g74320/LOC_Os02g30100/LOC_Os02g39280/LOC_Os03g23050/LOC_Os03g60220/LOC_Os03g62790/LOC_Os06g11990/LOC_Os06g16300/LOC_Os07g04730/LOC_Os08g04130/LOC_Os09g35620/LOC_Os11g04600/LOC_Os12g04410	15
GO:0000723	telomere maintenance	15/1602	99/15655	1.48	0.0784052	0.33101	LOC_Os01g07990/LOC_Os01g12340/LOC_Os01g14770/LOC_Os01g16130/LOC_Os01g40980/LOC_Os01g43980/LOC_Os01g43990/LOC_Os03g08400/LOC_Os04g51490/LOC_Os07g15160/LOC_Os08g01130/LOC_Os08g02000/LOC_Os08g34850/LOC_Os08g41070/LOC_Os10g24940	15
GO:0009791	post-embryonic development	15/1602	159/15655	0.92	0.669368	0.781874	LOC_Os02g56820/LOC_Os04g28310/LOC_Os05g05600/LOC_Os05g32070/LOC_Os06g11990/LOC_Os07g05470/LOC_Os09g33850/LOC_Os09g35620/LOC_Os11g04600/LOC_Os11g43800/LOC_Os12g04410/LOC_Os12g42120/Oryza_sativa_newGene_3279/Oryza_sativa_newGene_3643/Oryza_sativa_newGene_3675	15
GO:0006508	proteolysis	15/1602	173/15655	0.85	0.787236	0.859842	LOC_Os01g40820/LOC_Os01g67850/LOC_Os01g73280/LOC_Os02g51350/LOC_Os02g52130/LOC_Os03g03920/LOC_Os04g37550/LOC_Os05g45040/LOC_Os06g15760/LOC_Os06g39090/LOC_Os06g42824/LOC_Os08g13130/LOC_Os11g04600/LOC_Os11g39710/LOC_Os12g04410	15
GO:0099402	plant organ development	14/1602	110/15655	1.24	0.232942	0.494551	LOC_Os02g12790/LOC_Os03g53990/LOC_Os04g01160/LOC_Os05g05600/LOC_Os05g32070/LOC_Os06g11990/LOC_Os07g05470/LOC_Os07g49114/LOC_Os09g25330/LOC_Os10g10580/LOC_Os11g04600/LOC_Os12g04410/Oryza_sativa_newGene_3279/Oryza_sativa_newGene_3643	14
GO:0006310	DNA recombination	14/1602	126/15655	1.09	0.414425	0.610481	LOC_Os01g07990/LOC_Os01g12340/LOC_Os01g14770/LOC_Os01g16130/LOC_Os01g43980/LOC_Os01g43990/LOC_Os01g67850/LOC_Os03g08400/LOC_Os04g51490/LOC_Os07g15160/LOC_Os08g02000/LOC_Os08g34850/LOC_Os08g41070/LOC_Os10g24940	14
GO:2000112	regulation of cellular macromolecule biosynthetic process	14/1602	234/15655	0.58	0.99222	0.995083	LOC_Os01g67850/LOC_Os01g73280/LOC_Os02g31160/LOC_Os02g45760/LOC_Os02g53530/LOC_Os03g03900/LOC_Os03g11680/LOC_Os04g51130/LOC_Os05g37190/LOC_Os07g48900/LOC_Os09g25550/LOC_Os09g35620/LOC_Os10g25300/LOC_Os11g47910	14
GO:0018210	peptidyl-threonine modification	14/1602	356/15655	0.38	0.999997	0.995083	LOC_Os01g01860/LOC_Os01g22740/LOC_Os01g24620/LOC_Os03g38560/LOC_Os03g46230/LOC_Os03g52820/LOC_Os05g16130/LOC_Os06g39940/LOC_Os06g45260/LOC_Os07g10060/LOC_Os07g20200/LOC_Os08g19360/LOC_Os12g04040/LOC_Os12g40260	14
GO:0018107	peptidyl-threonine phosphorylation	14/1602	357/15655	0.38	0.999998	0.995083	LOC_Os01g01860/LOC_Os01g22740/LOC_Os01g24620/LOC_Os03g38560/LOC_Os03g46230/LOC_Os03g52820/LOC_Os05g16130/LOC_Os06g39940/LOC_Os06g45260/LOC_Os07g10060/LOC_Os07g20200/LOC_Os08g19360/LOC_Os12g04040/LOC_Os12g40260	14
GO:0018105	peptidyl-serine phosphorylation	14/1602	374/15655	0.37	0.999999	0.995083	LOC_Os01g01860/LOC_Os01g22740/LOC_Os01g24620/LOC_Os03g38560/LOC_Os03g46230/LOC_Os03g52820/LOC_Os04g43710/LOC_Os05g16130/LOC_Os06g39940/LOC_Os06g45260/LOC_Os07g10060/LOC_Os07g20200/LOC_Os08g19360/LOC_Os12g04040	14
GO:0018193	peptidyl-amino acid modification	14/1602	387/15655	0.35	1	0.995083	LOC_Os01g01860/LOC_Os01g22740/LOC_Os01g24620/LOC_Os03g38560/LOC_Os03g46230/LOC_Os03g52820/LOC_Os05g16130/LOC_Os06g39940/LOC_Os06g45260/LOC_Os07g10060/LOC_Os07g20200/LOC_Os08g19360/LOC_Os12g04040/LOC_Os12g40260	14
GO:0007017	microtubule-based process	13/1602	57/15655	2.23	0.00428112	0.326294	LOC_Os01g55510/LOC_Os01g73280/LOC_Os01g73560/LOC_Os02g12200/LOC_Os02g36990/LOC_Os02g57120/LOC_Os03g51600/LOC_Os05g34170/LOC_Os06g11990/LOC_Os07g05470/LOC_Os09g35620/LOC_Os10g03400/Oryza_sativa_newGene_3643	13
GO:1901701	cellular response to oxygen-containing compound	13/1602	72/15655	1.76	0.0296332	0.33101	LOC_Os02g43770/LOC_Os02g53530/LOC_Os03g11680/LOC_Os03g57200/LOC_Os03g59610/LOC_Os03g62790/LOC_Os05g50990/LOC_Os08g04130/LOC_Os09g35620/LOC_Os09g39310/LOC_Os11g04600/LOC_Os12g04410/LOC_Os12g41590	13
GO:0009416	response to light stimulus	13/1602	101/15655	1.26	0.231312	0.494551	LOC_Os01g55940/LOC_Os02g07760/LOC_Os02g10390/LOC_Os03g58040/LOC_Os03g62790/LOC_Os04g43420/LOC_Os05g04220/LOC_Os05g28040/LOC_Os07g04730/LOC_Os07g38960/LOC_Os08g33820/LOC_Os09g33850/LOC_Os10g42190	13
GO:0006486	protein glycosylation	13/1602	102/15655	1.25	0.242138	0.503188	LOC_Os02g06840/LOC_Os02g36770/LOC_Os03g05110/LOC_Os03g20850/LOC_Os03g48010/LOC_Os05g11060/LOC_Os05g35266/LOC_Os05g47880/LOC_Os08g34020/LOC_Os09g26300/LOC_Os10g32110/LOC_Os12g05550/LOC_Os12g16480	13
GO:0033554	cellular response to stress	13/1602	111/15655	1.14	0.346708	0.567741	LOC_Os01g01650/LOC_Os01g07260/LOC_Os01g67850/LOC_Os01g73280/LOC_Os02g53400/LOC_Os03g03920/LOC_Os03g18200/LOC_Os03g57200/LOC_Os03g58040/LOC_Os05g05600/LOC_Os06g11740/LOC_Os09g25550/LOC_Os09g35620	13
GO:0048869	cellular developmental process	13/1602	118/15655	1.08	0.432978	0.629703	LOC_Os01g42090/LOC_Os01g67850/LOC_Os02g53530/LOC_Os02g57120/LOC_Os03g11680/LOC_Os03g18200/LOC_Os06g11990/LOC_Os06g46754/LOC_Os09g35620/LOC_Os10g03400/LOC_Os10g10580/LOC_Os12g16290/Oryza_sativa_newGene_3279	13
GO:0065008	regulation of biological quality	13/1602	121/15655	1.05	0.47008	0.650782	LOC_Os01g25360/LOC_Os01g37650/LOC_Os01g55940/LOC_Os02g53400/LOC_Os02g57120/LOC_Os03g53990/LOC_Os06g21550/LOC_Os08g04130/LOC_Os09g09930/LOC_Os09g35620/LOC_Os09g39310/LOC_Os11g29350/LOC_Os12g08670	13
GO:0006810	transport	13/1602	151/15655	0.84	0.783414	0.856051	LOC_Os01g42090/LOC_Os01g73280/LOC_Os02g43770/LOC_Os02g56570/LOC_Os03g53990/LOC_Os07g47400/LOC_Os09g09930/LOC_Os09g35620/LOC_Os10g03400/LOC_Os10g10580/LOC_Os11g05470/LOC_Os12g13730/LOC_Os12g16290	13
GO:0048518	positive regulation of biological process	13/1602	159/15655	0.8	0.839584	0.895341	LOC_Os01g67850/LOC_Os01g73280/LOC_Os02g57120/LOC_Os03g03920/LOC_Os04g47700/LOC_Os04g51130/LOC_Os05g50990/LOC_Os06g30370/LOC_Os09g33850/LOC_Os09g35620/LOC_Os10g38930/LOC_Os11g04600/LOC_Os12g04410	13
GO:0051234	establishment of localization	13/1602	166/15655	0.77	0.878973	0.926434	LOC_Os01g42090/LOC_Os01g73280/LOC_Os02g43770/LOC_Os02g56570/LOC_Os03g53990/LOC_Os07g47400/LOC_Os09g09930/LOC_Os09g35620/LOC_Os10g03400/LOC_Os10g10580/LOC_Os11g05470/LOC_Os12g13730/LOC_Os12g16290	13
GO:0018209	peptidyl-serine modification	13/1602	362/15655	0.35	0.999999	0.995083	LOC_Os01g01860/LOC_Os01g22740/LOC_Os01g24620/LOC_Os03g38560/LOC_Os03g46230/LOC_Os03g52820/LOC_Os05g16130/LOC_Os06g39940/LOC_Os06g45260/LOC_Os07g10060/LOC_Os07g20200/LOC_Os08g19360/LOC_Os12g04040	13
GO:0006887	exocytosis	12/1602	81/15655	1.45	0.12147	0.369861	LOC_Os01g51880/LOC_Os01g56220/LOC_Os02g36619/LOC_Os04g58870/LOC_Os05g30700/LOC_Os06g08460/LOC_Os07g10940/LOC_Os08g13270/LOC_Os09g17810/LOC_Os09g35620/LOC_Os11g01050/LOC_Os11g05880	12
GO:0071310	cellular response to organic substance	12/1602	96/15655	1.22	0.275539	0.503188	LOC_Os01g73280/LOC_Os02g53530/LOC_Os03g11680/LOC_Os03g59610/LOC_Os03g62790/LOC_Os04g48370/LOC_Os05g50990/LOC_Os08g04130/LOC_Os09g35620/LOC_Os09g39310/LOC_Os11g04600/LOC_Os12g04410	12
GO:0010035	response to inorganic substance	12/1602	97/15655	1.21	0.287598	0.519198	LOC_Os01g25500/LOC_Os02g11720/LOC_Os02g43770/LOC_Os02g51710/LOC_Os03g57200/LOC_Os03g58040/LOC_Os03g59610/LOC_Os06g11990/LOC_Os07g04730/LOC_Os07g49114/LOC_Os09g35620/LOC_Os09g39310	12
GO:0006396	RNA processing	12/1602	111/15655	1.06	0.465847	0.650782	LOC_Os01g69120/LOC_Os01g73950/LOC_Os03g53170/LOC_Os03g59550/LOC_Os03g63740/LOC_Os04g28310/LOC_Os04g48370/LOC_Os05g25400/LOC_Os09g14610/LOC_Os10g25300/LOC_Os11g13420/LOC_Os11g14300	12
GO:0044085	cellular component biogenesis	12/1602	122/15655	0.96	0.601985	0.740399	LOC_Os01g42090/LOC_Os01g73560/LOC_Os02g57120/LOC_Os03g03920/LOC_Os06g11990/LOC_Os06g42824/LOC_Os07g05470/LOC_Os07g07760/LOC_Os09g35620/LOC_Os10g03400/LOC_Os10g25300/Oryza_sativa_newGene_3643	12
GO:0006351	transcription, DNA-templated	12/1602	131/15655	0.9	0.700015	0.801926	LOC_Os01g73430/LOC_Os02g45120/LOC_Os04g41040/LOC_Os05g06490/LOC_Os05g28040/LOC_Os05g37170/LOC_Os06g39480/LOC_Os08g32990/LOC_Os09g31390/LOC_Os10g41640/LOC_Os12g05680/Oryza_sativa_newGene_2435	12
GO:0030163	protein catabolic process	12/1602	152/15655	0.77	0.864294	0.91611	LOC_Os01g67850/LOC_Os01g73280/LOC_Os02g51350/LOC_Os02g52130/LOC_Os03g03920/LOC_Os04g37550/LOC_Os05g45040/LOC_Os06g15760/LOC_Os06g42824/LOC_Os08g13130/LOC_Os11g04600/LOC_Os12g04410	12
GO:1901575	organic substance catabolic process	12/1602	153/15655	0.77	0.869884	0.920224	LOC_Os01g67850/LOC_Os01g73280/LOC_Os02g51350/LOC_Os02g52130/LOC_Os03g03920/LOC_Os03g57200/LOC_Os05g45040/LOC_Os06g42824/LOC_Os08g13130/LOC_Os09g39440/LOC_Os11g04600/LOC_Os12g04410	12
GO:0016567	protein ubiquitination	12/1602	160/15655	0.73	0.904035	0.941407	LOC_Os01g67850/LOC_Os01g71590/LOC_Os01g74320/LOC_Os02g52130/LOC_Os04g01160/LOC_Os06g11990/LOC_Os07g07820/LOC_Os07g48680/LOC_Os08g04130/LOC_Os10g33620/LOC_Os11g11240/LOC_Os12g02660	12
GO:0044248	cellular catabolic process	12/1602	164/15655	0.72	0.91997	0.953979	LOC_Os01g67850/LOC_Os01g73280/LOC_Os02g51350/LOC_Os02g52130/LOC_Os03g03920/LOC_Os03g57200/LOC_Os05g45040/LOC_Os06g42824/LOC_Os08g13130/LOC_Os09g39440/LOC_Os11g04600/LOC_Os12g04410	12
GO:0006749	glutathione metabolic process	11/1602	35/15655	3.07	0.00050832	0.0826511	LOC_Os01g27360/LOC_Os01g27390/LOC_Os01g27480/LOC_Os01g73514/LOC_Os02g56850/LOC_Os03g57200/LOC_Os07g07320/LOC_Os09g29200/LOC_Os10g38150/LOC_Os10g38340/LOC_Os10g38780	11
GO:0009755	hormone-mediated signaling pathway	11/1602	62/15655	1.73	0.0482901	0.33101	LOC_Os02g12450/LOC_Os02g53530/LOC_Os03g11680/LOC_Os03g62790/LOC_Os05g50990/LOC_Os08g04130/LOC_Os09g35620/LOC_Os10g33040/LOC_Os11g04600/LOC_Os11g40970/LOC_Os12g04410	11
GO:0050832	defense response to fungus	11/1602	64/15655	1.68	0.0586969	0.33101	LOC_Os01g25360/LOC_Os01g37650/LOC_Os02g39280/LOC_Os03g60220/LOC_Os05g15880/LOC_Os06g51060/LOC_Os10g39700/LOC_Os11g37940/LOC_Os11g37950/LOC_Os11g37970/LOC_Os11g47520	11
GO:0032989	cellular component morphogenesis	11/1602	68/15655	1.58	0.0836835	0.33101	LOC_Os01g42090/LOC_Os02g53530/LOC_Os02g57120/LOC_Os03g11680/LOC_Os03g18200/LOC_Os06g11990/LOC_Os06g46754/LOC_Os09g35620/LOC_Os10g03400/LOC_Os10g10580/Oryza_sativa_newGene_3279	11
GO:0080134	regulation of response to stress	11/1602	73/15655	1.47	0.12292	0.371955	LOC_Os01g67850/LOC_Os01g73280/LOC_Os03g03920/LOC_Os04g32480/LOC_Os07g05830/LOC_Os08g04130/LOC_Os09g35620/LOC_Os10g38930/LOC_Os11g04600/LOC_Os12g04410/LOC_Os12g08670	11
GO:0045944	positive regulation of transcription from RNA polymerase II promoter	11/1602	76/15655	1.41	0.150632	0.424026	LOC_Os01g10504/LOC_Os01g66030/LOC_Os02g36924/LOC_Os03g08754/LOC_Os03g14850/LOC_Os06g01890/LOC_Os06g45650/LOC_Os06g49840/LOC_Os09g35620/LOC_Os10g39130/LOC_Os12g31748	11
GO:0019941	modification-dependent protein catabolic process	11/1602	89/15655	1.21	0.300422	0.540301	LOC_Os01g67850/LOC_Os01g73280/LOC_Os02g51350/LOC_Os02g52130/LOC_Os03g03920/LOC_Os05g45040/LOC_Os06g42824/LOC_Os08g13130/LOC_Os10g33620/LOC_Os11g04600/LOC_Os12g04410	11
GO:0010605	negative regulation of macromolecule metabolic process	11/1602	99/15655	1.09	0.434121	0.630613	LOC_Os01g67850/LOC_Os01g73280/LOC_Os02g31160/LOC_Os02g52130/LOC_Os03g23050/LOC_Os03g62790/LOC_Os04g32480/LOC_Os04g48370/LOC_Os07g05830/LOC_Os09g35620/LOC_Os12g16290	11
GO:0009892	negative regulation of metabolic process	11/1602	105/15655	1.02	0.514511	0.686928	LOC_Os01g67850/LOC_Os01g73280/LOC_Os02g31160/LOC_Os02g52130/LOC_Os03g23050/LOC_Os03g62790/LOC_Os04g32480/LOC_Os04g48370/LOC_Os07g05830/LOC_Os09g35620/LOC_Os12g16290	11
GO:0048608	reproductive structure development	11/1602	109/15655	0.99	0.566227	0.719812	LOC_Os02g56820/LOC_Os05g05600/LOC_Os05g32070/LOC_Os06g11990/LOC_Os09g33850/LOC_Os09g35620/LOC_Os11g04600/LOC_Os11g43800/LOC_Os12g04410/LOC_Os12g42120/Oryza_sativa_newGene_3675	11
GO:0061458	reproductive system development	11/1602	110/15655	0.98	0.578812	0.719883	LOC_Os02g56820/LOC_Os05g05600/LOC_Os05g32070/LOC_Os06g11990/LOC_Os09g33850/LOC_Os09g35620/LOC_Os11g04600/LOC_Os11g43800/LOC_Os12g04410/LOC_Os12g42120/Oryza_sativa_newGene_3675	11
GO:0044257	cellular protein catabolic process	11/1602	112/15655	0.96	0.603496	0.741883	LOC_Os01g67850/LOC_Os01g73280/LOC_Os02g51350/LOC_Os02g52130/LOC_Os03g03920/LOC_Os05g45040/LOC_Os05g48390/LOC_Os06g42824/LOC_Os08g13130/LOC_Os11g04600/LOC_Os12g04410	11
GO:0009733	response to auxin	11/1602	113/15655	0.95	0.615579	0.74795	LOC_Os01g09280/LOC_Os01g15340/LOC_Os01g55940/LOC_Os01g70050/LOC_Os05g32070/LOC_Os05g50990/LOC_Os06g48860/LOC_Os06g50040/LOC_Os07g05470/LOC_Os09g37330/Oryza_sativa_newGene_3643	11
GO:1901565	organonitrogen compound catabolic process	11/1602	119/15655	0.9	0.68398	0.794756	LOC_Os01g67850/LOC_Os01g73280/LOC_Os02g51350/LOC_Os02g52130/LOC_Os03g03920/LOC_Os05g45040/LOC_Os06g42824/LOC_Os08g13130/LOC_Os09g39440/LOC_Os11g04600/LOC_Os12g04410	11
GO:0006096	glycolytic process	10/1602	39/15655	2.51	0.00485578	0.33101	LOC_Os01g09460/LOC_Os01g52450/LOC_Os01g62420/LOC_Os05g09500/LOC_Os05g33380/LOC_Os05g41640/LOC_Os06g04510/LOC_Os07g09890/LOC_Os08g37380/LOC_Os09g36450	10
GO:0000226	microtubule cytoskeleton organization	10/1602	51/15655	1.92	0.0318096	0.33101	LOC_Os01g73280/LOC_Os01g73560/LOC_Os02g03400/LOC_Os02g57120/LOC_Os06g11990/LOC_Os07g05470/LOC_Os09g27700/LOC_Os09g35620/LOC_Os10g03400/Oryza_sativa_newGene_3643	10
GO:0007010	cytoskeleton organization	10/1602	53/15655	1.84	0.0403492	0.33101	LOC_Os01g73280/LOC_Os01g73560/LOC_Os02g57120/LOC_Os03g11650/LOC_Os06g11990/LOC_Os07g05470/LOC_Os09g35620/LOC_Os10g03400/LOC_Os12g40260/Oryza_sativa_newGene_3643	10
GO:0019953	sexual reproduction	10/1602	60/15655	1.63	0.0820923	0.33101	LOC_Os01g67850/LOC_Os01g73560/LOC_Os03g23050/LOC_Os07g05470/LOC_Os09g35620/LOC_Os10g03400/LOC_Os10g40700/LOC_Os10g40720/LOC_Os12g16290/Oryza_sativa_newGene_3643	10
GO:0050790	regulation of catalytic activity	10/1602	62/15655	1.58	0.0975945	0.33101	LOC_Os01g73280/LOC_Os02g56570/LOC_Os03g62790/LOC_Os04g31340/LOC_Os04g47700/LOC_Os05g01380/LOC_Os06g42824/LOC_Os09g25550/LOC_Os09g35620/LOC_Os11g37330	10
GO:1901362	organic cyclic compound biosynthetic process	10/1602	64/15655	1.53	0.114697	0.363707	LOC_Os01g73280/LOC_Os02g51410/LOC_Os03g59610/LOC_Os04g54800/LOC_Os05g28040/LOC_Os06g12150/LOC_Os11g39710/LOC_Os12g16220/LOC_Os12g16240/LOC_Os12g16250	10
GO:0006869	lipid transport	10/1602	67/15655	1.46	0.143273	0.424026	LOC_Os02g20970/LOC_Os02g24720/LOC_Os05g40010/LOC_Os06g38950/LOC_Os06g47130/LOC_Os07g30590/LOC_Os10g03400/LOC_Os11g02369/LOC_Os12g02310/LOC_Os12g02330	10
GO:0048468	cell development	10/1602	69/15655	1.42	0.164179	0.424026	LOC_Os01g67850/LOC_Os02g53530/LOC_Os03g11680/LOC_Os03g18200/LOC_Os06g46754/LOC_Os09g35620/LOC_Os10g03400/LOC_Os10g10580/LOC_Os12g16290/Oryza_sativa_newGene_3279	10
GO:0019438	aromatic compound biosynthetic process	10/1602	72/15655	1.36	0.198097	0.431383	LOC_Os01g73280/LOC_Os02g51410/LOC_Os04g09604/LOC_Os04g54800/LOC_Os05g28040/LOC_Os06g12150/LOC_Os11g39710/LOC_Os12g16220/LOC_Os12g16240/LOC_Os12g16250	10
GO:0065009	regulation of molecular function	10/1602	72/15655	1.36	0.198097	0.431383	LOC_Os01g73280/LOC_Os02g56570/LOC_Os03g03920/LOC_Os03g62790/LOC_Os04g31340/LOC_Os04g47700/LOC_Os05g01380/LOC_Os06g42824/LOC_Os09g25550/LOC_Os09g35620	10
GO:0043161	proteasome-mediated ubiquitin-dependent protein catabolic process	10/1602	80/15655	1.22	0.300617	0.540301	LOC_Os01g73280/LOC_Os02g51350/LOC_Os03g03920/LOC_Os05g45040/LOC_Os06g42824/LOC_Os07g42260/LOC_Os08g13130/LOC_Os08g33340/LOC_Os11g04600/LOC_Os12g04410	10
GO:0023051	regulation of signaling	10/1602	82/15655	1.19	0.328204	0.567741	LOC_Os01g73280/LOC_Os02g53530/LOC_Os03g03920/LOC_Os03g11680/LOC_Os04g32480/LOC_Os05g50990/LOC_Os07g05830/LOC_Os09g35620/LOC_Os09g39310/LOC_Os12g08670	10
GO:0043632	modification-dependent macromolecule catabolic process	10/1602	82/15655	1.19	0.328204	0.567741	LOC_Os01g67850/LOC_Os01g73280/LOC_Os02g51350/LOC_Os02g52130/LOC_Os03g03920/LOC_Os05g45040/LOC_Os06g42824/LOC_Os08g13130/LOC_Os11g04600/LOC_Os12g04410	10
GO:0009966	regulation of signal transduction	10/1602	85/15655	1.15	0.370415	0.592797	LOC_Os01g73280/LOC_Os02g39030/LOC_Os02g53530/LOC_Os03g03920/LOC_Os03g11680/LOC_Os04g32480/LOC_Os05g50990/LOC_Os07g05830/LOC_Os09g35620/LOC_Os09g39310	10
GO:0010646	regulation of cell communication	10/1602	85/15655	1.15	0.370415	0.592797	LOC_Os01g73280/LOC_Os02g53530/LOC_Os03g03920/LOC_Os03g11680/LOC_Os04g32480/LOC_Os05g50990/LOC_Os07g05830/LOC_Os09g35620/LOC_Os09g39310/LOC_Os12g08670	10
GO:0051246	regulation of protein metabolic process	10/1602	93/15655	1.05	0.48413	0.65891	LOC_Os02g51350/LOC_Os03g03920/LOC_Os03g62790/LOC_Os04g31340/LOC_Os06g42824/LOC_Os08g13130/LOC_Os09g25550/LOC_Os09g35620/LOC_Os11g04600/LOC_Os12g04410	10
GO:0022607	cellular component assembly	10/1602	97/15655	1.01	0.53948	0.69654	LOC_Os01g42090/LOC_Os01g73560/LOC_Os02g57120/LOC_Os03g03920/LOC_Os06g11990/LOC_Os06g42824/LOC_Os07g05470/LOC_Os09g35620/LOC_Os10g03400/Oryza_sativa_newGene_3643	10
GO:0033036	macromolecule localization	10/1602	104/15655	0.94	0.630403	0.757399	LOC_Os01g42090/LOC_Os01g73280/LOC_Os02g56570/LOC_Os06g11990/LOC_Os06g16300/LOC_Os07g47400/LOC_Os09g35620/LOC_Os10g03400/LOC_Os11g05470/LOC_Os12g16290	10
GO:0051641	cellular localization	10/1602	105/15655	0.93	0.642602	0.770765	LOC_Os01g42090/LOC_Os01g73280/LOC_Os02g56570/LOC_Os06g11990/LOC_Os06g16300/LOC_Os07g47400/LOC_Os09g35620/LOC_Os10g10580/LOC_Os11g05470/LOC_Os12g16290	10
GO:0044265	cellular macromolecule catabolic process	10/1602	128/15655	0.76	0.855612	0.909866	LOC_Os01g67850/LOC_Os01g73280/LOC_Os02g51350/LOC_Os02g52130/LOC_Os03g03920/LOC_Os05g45040/LOC_Os06g42824/LOC_Os08g13130/LOC_Os11g04600/LOC_Os12g04410	10
GO:0009057	macromolecule catabolic process	10/1602	133/15655	0.73	0.885045	0.927622	LOC_Os01g67850/LOC_Os01g73280/LOC_Os02g51350/LOC_Os02g52130/LOC_Os03g03920/LOC_Os05g45040/LOC_Os06g42824/LOC_Os08g13130/LOC_Os11g04600/LOC_Os12g04410	10
GO:0030154	cell differentiation	10/1602	133/15655	0.73	0.885045	0.927622	LOC_Os01g67850/LOC_Os02g53530/LOC_Os03g11680/LOC_Os03g18200/LOC_Os06g46754/LOC_Os09g35620/LOC_Os10g03400/LOC_Os10g10580/LOC_Os12g16290/Oryza_sativa_newGene_3279	10
GO:0009772	photosynthetic electron transport in photosystem II	9/1602	14/15655	6.28	1.49453e-06	0.000607513	LOC_Os02g24632/LOC_Os02g24634/LOC_Os04g16770/LOC_Os04g16872/LOC_Os04g16874/LOC_Os06g39708/LOC_Os08g35420/LOC_Os10g21212/LOC_Os10g41689	9
GO:0009738	abscisic acid-activated signaling pathway	9/1602	31/15655	2.84	0.00300877	0.253042	LOC_Os03g16170/LOC_Os03g41460/LOC_Os03g62790/LOC_Os07g38170/LOC_Os12g36830/LOC_Os12g36840/LOC_Os12g36850/LOC_Os12g36860/LOC_Os12g36880	9
GO:0006955	immune response	9/1602	35/15655	2.51	0.00725355	0.33101	LOC_Os01g25360/LOC_Os01g37650/LOC_Os01g54510/LOC_Os01g67850/LOC_Os03g23050/LOC_Os07g04730/LOC_Os09g35620/LOC_Os11g04600/LOC_Os12g04410	9
GO:0002376	immune system process	9/1602	39/15655	2.26	0.0150199	0.33101	LOC_Os01g25360/LOC_Os01g37650/LOC_Os01g67850/LOC_Os03g23050/LOC_Os06g16300/LOC_Os07g04730/LOC_Os09g35620/LOC_Os11g04600/LOC_Os12g04410	9
GO:0030244	cellulose biosynthetic process	9/1602	40/15655	2.2	0.0176698	0.33101	LOC_Os03g18120/LOC_Os06g11990/LOC_Os07g24190/LOC_Os07g36690/LOC_Os07g36700/LOC_Os09g30120/LOC_Os09g30130/LOC_Os10g42750/LOC_Os12g36890	9
GO:0031047	gene silencing by RNA	9/1602	46/15655	1.91	0.0410288	0.33101	LOC_Os01g10140/LOC_Os03g39940/LOC_Os03g58600/LOC_Os04g48370/LOC_Os06g51310/LOC_Os07g28850/LOC_Os09g14610/LOC_Os12g09580/LOC_Os12g16290	9
GO:0009617	response to bacterium	9/1602	49/15655	1.79	0.0582139	0.33101	LOC_Os01g74320/LOC_Os02g31160/LOC_Os02g39160/LOC_Os03g62790/LOC_Os06g11990/LOC_Os08g04130/LOC_Os09g35620/LOC_Os11g04600/LOC_Os12g04410	9
GO:0048585	negative regulation of response to stimulus	9/1602	54/15655	1.63	0.0959019	0.33101	LOC_Os01g73280/LOC_Os02g31160/LOC_Os02g53530/LOC_Os03g11680/LOC_Os06g11990/LOC_Os08g04130/LOC_Os09g35620/LOC_Os09g39310/LOC_Os12g08670	9
GO:1901698	response to nitrogen compound	9/1602	57/15655	1.54	0.123995	0.374741	LOC_Os01g25500/LOC_Os01g73280/LOC_Os02g12790/LOC_Os02g43770/LOC_Os03g03920/LOC_Os03g58040/LOC_Os04g45970/LOC_Os04g48370/LOC_Os09g35620	9
GO:0044281	small molecule metabolic process	9/1602	64/15655	1.37	0.204174	0.443824	LOC_Os01g25360/LOC_Os01g37650/LOC_Os02g51410/LOC_Os02g57400/LOC_Os03g59610/LOC_Os04g54800/LOC_Os06g12150/LOC_Os09g39310/LOC_Os09g39440	9
GO:0006633	fatty acid biosynthetic process	9/1602	68/15655	1.29	0.257577	0.503188	LOC_Os02g43090/LOC_Os03g39860/LOC_Os03g63930/LOC_Os06g15020/LOC_Os07g15190/LOC_Os09g10600/LOC_Os09g36860/LOC_Os10g07010/LOC_Os12g34890	9
GO:0010498	proteasomal protein catabolic process	9/1602	74/15655	1.19	0.344423	0.567741	LOC_Os01g73280/LOC_Os02g51350/LOC_Os03g03920/LOC_Os05g45040/LOC_Os06g42824/LOC_Os07g42260/LOC_Os08g13130/LOC_Os11g04600/LOC_Os12g04410	9
GO:0007049	cell cycle	9/1602	80/15655	1.1	0.43481	0.631237	LOC_Os01g07260/LOC_Os01g73280/LOC_Os02g57120/LOC_Os03g05300/LOC_Os03g23050/LOC_Os06g11990/LOC_Os09g35620/LOC_Os10g03400/LOC_Os12g40260	9
GO:0009888	tissue development	9/1602	85/15655	1.03	0.50932	0.685165	LOC_Os02g53530/LOC_Os03g11680/LOC_Os03g53990/LOC_Os04g51130/LOC_Os09g35620/LOC_Os10g10580/LOC_Os11g04600/LOC_Os12g04410/Oryza_sativa_newGene_3279	9
GO:0051239	regulation of multicellular organismal process	9/1602	88/15655	1	0.55258	0.711946	LOC_Os01g73280/LOC_Os06g11990/LOC_Os06g16300/LOC_Os06g30370/LOC_Os07g07820/LOC_Os09g33850/LOC_Os09g35620/LOC_Os09g39310/LOC_Os11g05470	9
GO:0009734	auxin-activated signaling pathway	9/1602	90/15655	0.98	0.58055	0.720377	LOC_Os01g09450/LOC_Os01g13030/LOC_Os01g13520/LOC_Os01g48060/LOC_Os01g58860/LOC_Os04g57610/LOC_Os04g59430/LOC_Os05g09480/LOC_Os05g50990	9
GO:0033993	response to lipid	9/1602	90/15655	0.98	0.58055	0.720377	LOC_Os02g52130/LOC_Os02g53530/LOC_Os03g11680/LOC_Os03g62790/LOC_Os05g50990/LOC_Os06g13060/LOC_Os06g30370/LOC_Os09g35620/LOC_Os10g10580	9
GO:0006886	intracellular protein transport	9/1602	206/15655	0.43	0.999382	0.995083	LOC_Os01g73280/LOC_Os02g56570/LOC_Os03g13860/LOC_Os04g33690/LOC_Os07g47400/LOC_Os09g28610/LOC_Os10g22330/LOC_Os10g30520/LOC_Os11g05470	9
GO:0016998	cell wall macromolecule catabolic process	8/1602	15/15655	5.21	3.92959e-05	0.00958407	LOC_Os01g18400/LOC_Os02g39330/LOC_Os03g04060/LOC_Os04g41620/LOC_Os06g51050/LOC_Os06g51060/LOC_Os09g32080/LOC_Os10g39700	8
GO:0006032	chitin catabolic process	8/1602	16/15655	4.89	7.15373e-05	0.0158614	LOC_Os01g18400/LOC_Os02g39330/LOC_Os03g04060/LOC_Os04g41620/LOC_Os06g51050/LOC_Os06g51060/LOC_Os09g32080/LOC_Os10g39700	8
GO:1901615	organic hydroxy compound metabolic process	8/1602	22/15655	3.55	0.00101383	0.130141	LOC_Os01g25360/LOC_Os01g37650/LOC_Os02g51410/LOC_Os02g57400/LOC_Os03g59610/LOC_Os04g54800/LOC_Os06g12150/Oryza_sativa_newGene_3675	8
GO:0009116	nucleoside metabolic process	8/1602	30/15655	2.61	0.00885126	0.33101	LOC_Os01g52530/LOC_Os02g03540/LOC_Os02g40010/LOC_Os05g13970/LOC_Os05g38170/LOC_Os06g41360/LOC_Os09g39440/LOC_Os12g39860	8
GO:0048609	multicellular organismal reproductive process	8/1602	38/15655	2.06	0.0356547	0.33101	LOC_Os01g67850/LOC_Os01g73560/LOC_Os03g23050/LOC_Os06g11990/LOC_Os07g05470/LOC_Os09g35620/LOC_Os12g16290/Oryza_sativa_newGene_3643	8
GO:0044703	multi-organism reproductive process	8/1602	40/15655	1.95	0.0468074	0.33101	LOC_Os01g67850/LOC_Os01g73560/LOC_Os03g23050/LOC_Os07g05470/LOC_Os09g35620/LOC_Os10g03400/LOC_Os12g16290/Oryza_sativa_newGene_3643	8
GO:0032504	multicellular organism reproduction	8/1602	43/15655	1.82	0.0674173	0.33101	LOC_Os01g67850/LOC_Os01g73560/LOC_Os03g23050/LOC_Os06g11990/LOC_Os07g05470/LOC_Os09g35620/LOC_Os12g16290/Oryza_sativa_newGene_3643	8
GO:0071229	cellular response to acid chemical	8/1602	48/15655	1.63	0.112447	0.359911	LOC_Os02g43770/LOC_Os02g53530/LOC_Os03g11680/LOC_Os03g57200/LOC_Os03g62790/LOC_Os08g04130/LOC_Os11g04600/LOC_Os12g04410	8
GO:0010038	response to metal ion	8/1602	51/15655	1.53	0.145686	0.424026	LOC_Os02g11720/LOC_Os03g08800/LOC_Os03g57200/LOC_Os03g58040/LOC_Os06g11990/LOC_Os07g04730/LOC_Os09g35620/LOC_Os09g39310	8
GO:0046686	response to cadmium ion	8/1602	55/15655	1.42	0.196484	0.428635	LOC_Os01g01710/LOC_Os02g11720/LOC_Os03g16020/LOC_Os03g57200/LOC_Os03g58040/LOC_Os07g04730/LOC_Os08g37874/LOC_Os09g35620	8
GO:0009408	response to heat	8/1602	63/15655	1.24	0.314672	0.554929	LOC_Os01g08860/LOC_Os02g07760/LOC_Os03g16020/LOC_Os03g18200/LOC_Os03g59610/LOC_Os04g43420/LOC_Os07g33350/LOC_Os10g18340	8
GO:0032870	cellular response to hormone stimulus	8/1602	65/15655	1.2	0.346369	0.567741	LOC_Os02g53530/LOC_Os03g11680/LOC_Os03g62790/LOC_Os05g50990/LOC_Os08g04130/LOC_Os09g35620/LOC_Os11g04600/LOC_Os12g04410	8
GO:0007018	microtubule-based movement	8/1602	66/15655	1.18	0.362378	0.584151	LOC_Os02g12200/LOC_Os02g43130/LOC_Os03g53920/LOC_Os03g64415/LOC_Os08g33000/LOC_Os09g25380/LOC_Os12g42160/Oryza_sativa_newGene_2294	8
GO:0000902	cell morphogenesis	8/1602	68/15655	1.15	0.394572	0.610481	LOC_Os02g53530/LOC_Os02g57120/LOC_Os03g11680/LOC_Os03g18200/LOC_Os06g46754/LOC_Os09g35620/LOC_Os10g10580/Oryza_sativa_newGene_3279	8
GO:0071495	cellular response to endogenous stimulus	8/1602	70/15655	1.12	0.426815	0.622276	LOC_Os02g53530/LOC_Os03g11680/LOC_Os03g62790/LOC_Os05g50990/LOC_Os08g04130/LOC_Os09g35620/LOC_Os11g04600/LOC_Os12g04410	8
GO:0045454	cell redox homeostasis	8/1602	72/15655	1.09	0.458897	0.650782	LOC_Os02g53400/LOC_Os02g56850/LOC_Os03g29190/LOC_Os03g29240/LOC_Os05g06460/LOC_Os06g11740/LOC_Os06g21550/LOC_Os08g15204	8
GO:0009409	response to cold	8/1602	73/15655	1.07	0.474814	0.650782	LOC_Os02g07760/LOC_Os02g51710/LOC_Os03g57200/LOC_Os04g45970/LOC_Os05g02060/LOC_Os06g04070/LOC_Os09g37100/LOC_Os10g41550	8
GO:0048364	root development	8/1602	78/15655	1	0.552294	0.711946	LOC_Os01g40980/LOC_Os04g01160/LOC_Os05g32070/LOC_Os07g05470/LOC_Os10g10580/LOC_Os11g37330/Oryza_sativa_newGene_3279/Oryza_sativa_newGene_3643	8
GO:0070727	cellular macromolecule localization	8/1602	82/15655	0.95	0.610643	0.74795	LOC_Os01g42090/LOC_Os01g73280/LOC_Os02g56570/LOC_Os06g11990/LOC_Os06g16300/LOC_Os07g47400/LOC_Os09g35620/LOC_Os11g05470	8
GO:0071702	organic substance transport	8/1602	86/15655	0.91	0.664789	0.776898	LOC_Os01g42090/LOC_Os01g73280/LOC_Os02g56570/LOC_Os07g39010/LOC_Os07g47400/LOC_Os10g03400/LOC_Os11g05470/LOC_Os12g16290	8
GO:0008104	protein localization	8/1602	90/15655	0.87	0.714166	0.815837	LOC_Os01g73280/LOC_Os02g56570/LOC_Os03g15230/LOC_Os06g11990/LOC_Os06g16300/LOC_Os07g47400/LOC_Os09g35620/LOC_Os11g05470	8
GO:0048367	shoot system development	8/1602	91/15655	0.86	0.725726	0.820541	LOC_Os03g53990/LOC_Os05g05600/LOC_Os05g32070/LOC_Os06g11990/LOC_Os07g49114/LOC_Os11g04600/LOC_Os12g04410/Oryza_sativa_newGene_3279	8
GO:0009737	response to abscisic acid	8/1602	99/15655	0.79	0.806711	0.869433	LOC_Os01g61080/LOC_Os02g52130/LOC_Os03g48010/LOC_Os03g62790/LOC_Os05g50990/LOC_Os06g13060/LOC_Os06g30370/LOC_Os10g10580	8
GO:0050793	regulation of developmental process	8/1602	106/15655	0.74	0.861453	0.91429	LOC_Os06g11990/LOC_Os06g16300/LOC_Os06g30370/LOC_Os07g07820/LOC_Os09g33850/LOC_Os09g35620/LOC_Os09g39310/LOC_Os11g05470	8
GO:0006457	protein folding	8/1602	124/15655	0.63	0.946722	0.970986	ChrSy.fgenesh.gene.28/LOC_Os02g02890/LOC_Os02g14929/LOC_Os02g48780/LOC_Os06g11740/LOC_Os07g32950/LOC_Os07g38230/LOC_Os09g36420	8
GO:0002682	regulation of immune system process	7/1602	26/15655	2.63	0.0133112	0.33101	LOC_Os01g73280/LOC_Os02g31160/LOC_Os06g11990/LOC_Os09g35620/LOC_Os10g38930/LOC_Os11g04600/LOC_Os12g04410	7
GO:0007276	gamete generation	7/1602	29/15655	2.36	0.0241138	0.33101	LOC_Os01g67850/LOC_Os01g73560/LOC_Os03g23050/LOC_Os07g05470/LOC_Os09g35620/LOC_Os12g16290/Oryza_sativa_newGene_3643	7
GO:0008299	isoprenoid biosynthetic process	7/1602	29/15655	2.36	0.0241138	0.33101	LOC_Os01g66360/LOC_Os03g02710/LOC_Os03g59610/LOC_Os07g39270/LOC_Os08g09370/LOC_Os09g31970/LOC_Os09g39310	7
GO:0008643	carbohydrate transport	7/1602	34/15655	2.01	0.053233	0.33101	LOC_Os01g42090/LOC_Os02g19820/LOC_Os03g07170/LOC_Os07g39010/LOC_Os07g39350/LOC_Os09g24924/LOC_Os12g29220	7
GO:0006082	organic acid metabolic process	7/1602	41/15655	1.67	0.120379	0.366999	LOC_Os01g25360/LOC_Os01g37650/LOC_Os02g51410/LOC_Os03g59610/LOC_Os04g54800/LOC_Os06g12150/LOC_Os09g39310	7
GO:0043436	oxoacid metabolic process	7/1602	41/15655	1.67	0.120379	0.366999	LOC_Os01g25360/LOC_Os01g37650/LOC_Os02g51410/LOC_Os03g59610/LOC_Os04g54800/LOC_Os06g12150/LOC_Os09g39310	7
GO:0032879	regulation of localization	7/1602	44/15655	1.55	0.158292	0.424026	LOC_Os01g73280/LOC_Os02g56570/LOC_Os03g03920/LOC_Os04g47700/LOC_Os09g35620/LOC_Os11g29350/LOC_Os12g08670	7
GO:0019752	carboxylic acid metabolic process	7/1602	45/15655	1.52	0.172009	0.424026	LOC_Os01g25360/LOC_Os01g37650/LOC_Os02g51410/LOC_Os03g59610/LOC_Os04g54800/LOC_Os06g12150/LOC_Os09g39310	7
GO:1905392	plant organ morphogenesis	7/1602	48/15655	1.43	0.215992	0.468676	LOC_Os03g53990/LOC_Os07g05470/LOC_Os10g10580/LOC_Os11g04600/LOC_Os12g04410/Oryza_sativa_newGene_3279/Oryza_sativa_newGene_3643	7
GO:0000904	cell morphogenesis involved in differentiation	7/1602	49/15655	1.4	0.231485	0.494551	LOC_Os02g53530/LOC_Os03g11680/LOC_Os03g18200/LOC_Os06g46754/LOC_Os09g35620/LOC_Os10g10580/Oryza_sativa_newGene_3279	7
GO:0016049	cell growth	7/1602	50/15655	1.37	0.247337	0.503188	LOC_Os02g57120/LOC_Os03g18200/LOC_Os03g53990/LOC_Os06g11990/LOC_Os06g46754/LOC_Os09g35620/Oryza_sativa_newGene_3279	7
GO:0048584	positive regulation of response to stimulus	7/1602	50/15655	1.37	0.247337	0.503188	LOC_Os01g67850/LOC_Os03g03920/LOC_Os05g50990/LOC_Os09g35620/LOC_Os10g38930/LOC_Os11g04600/LOC_Os12g04410	7
GO:0010608	posttranscriptional regulation of gene expression	7/1602	51/15655	1.34	0.263508	0.503188	LOC_Os02g52130/LOC_Os03g23050/LOC_Os04g48370/LOC_Os06g46900/LOC_Os12g16290/LOC_Os12g31000/LOC_Os12g38590	7
GO:0048229	gametophyte development	7/1602	51/15655	1.34	0.263508	0.503188	LOC_Os01g08880/LOC_Os01g42090/LOC_Os03g23050/LOC_Os04g34670/LOC_Os05g32070/LOC_Os06g11990/LOC_Os06g20440	7
GO:0048827	phyllome development	7/1602	52/15655	1.32	0.279963	0.506539	LOC_Os03g53990/LOC_Os05g05600/LOC_Os05g32070/LOC_Os06g11990/LOC_Os07g49114/LOC_Os11g04600/LOC_Os12g04410	7
GO:0016042	lipid catabolic process	7/1602	54/15655	1.27	0.313568	0.553383	LOC_Os03g18010/LOC_Os05g07880/LOC_Os07g15680/LOC_Os08g37180/LOC_Os08g37210/LOC_Os08g41780/LOC_Os09g28770	7
GO:0017148	negative regulation of translation	7/1602	56/15655	1.22	0.347849	0.567741	LOC_Os02g40340/LOC_Os03g54860/LOC_Os10g42060/LOC_Os11g35425/LOC_Os12g01290/LOC_Os12g35010/Oryza_sativa_newGene_1039	7
GO:0040007	growth	7/1602	56/15655	1.22	0.347849	0.567741	LOC_Os02g57120/LOC_Os03g18200/LOC_Os03g53990/LOC_Os06g11990/LOC_Os06g46754/LOC_Os09g35620/Oryza_sativa_newGene_3279	7
GO:0009611	response to wounding	7/1602	57/15655	1.2	0.365149	0.588115	LOC_Os01g08760/LOC_Os01g42860/LOC_Os04g32480/LOC_Os05g02060/LOC_Os05g50890/LOC_Os07g05830/LOC_Os08g04130	7
GO:0048580	regulation of post-embryonic development	7/1602	58/15655	1.18	0.382507	0.610481	LOC_Os06g11990/LOC_Os06g30370/LOC_Os07g07820/LOC_Os09g33850/LOC_Os09g35620/LOC_Os09g39310/LOC_Os11g05470	7
GO:0010629	negative regulation of gene expression	7/1602	60/15655	1.14	0.417259	0.610481	LOC_Os01g67850/LOC_Os02g31160/LOC_Os02g52130/LOC_Os03g23050/LOC_Os04g48370/LOC_Os09g35620/LOC_Os12g16290	7
GO:0097305	response to alcohol	7/1602	62/15655	1.1	0.451836	0.650782	LOC_Os02g52130/LOC_Os03g62790/LOC_Os05g50990/LOC_Os06g13060/LOC_Os06g30370/LOC_Os09g35620/LOC_Os10g10580	7
GO:0009555	pollen development	7/1602	64/15655	1.07	0.485993	0.661078	LOC_Os01g40980/LOC_Os01g42090/LOC_Os03g23050/LOC_Os05g32070/LOC_Os06g11990/LOC_Os07g37920/LOC_Os09g10850	7
GO:0051172	negative regulation of nitrogen compound metabolic process	7/1602	71/15655	0.96	0.599293	0.737459	LOC_Os01g67850/LOC_Os01g73280/LOC_Os02g31160/LOC_Os03g62790/LOC_Os04g32480/LOC_Os07g05830/LOC_Os09g35620	7
GO:0022402	cell cycle process	7/1602	72/15655	0.95	0.614413	0.74795	LOC_Os01g07260/LOC_Os01g73280/LOC_Os03g23050/LOC_Os06g11990/LOC_Os09g35620/LOC_Os10g03400/LOC_Os12g40260	7
GO:0031324	negative regulation of cellular metabolic process	7/1602	74/15655	0.92	0.643699	0.771094	LOC_Os01g67850/LOC_Os01g73280/LOC_Os02g31160/LOC_Os03g62790/LOC_Os04g32480/LOC_Os07g05830/LOC_Os09g35620	7
GO:0071705	nitrogen compound transport	7/1602	75/15655	0.91	0.657844	0.772093	LOC_Os01g73280/LOC_Os02g43770/LOC_Os02g56570/LOC_Os07g47400/LOC_Os11g05470/LOC_Os12g16290/LOC_Os12g31850	7
GO:0046907	intracellular transport	7/1602	77/15655	0.89	0.685095	0.795672	LOC_Os01g73280/LOC_Os02g56570/LOC_Os07g47400/LOC_Os09g35620/LOC_Os10g10580/LOC_Os11g05470/LOC_Os12g16290	7
GO:0034613	cellular protein localization	7/1602	78/15655	0.88	0.698188	0.800209	LOC_Os01g73280/LOC_Os02g56570/LOC_Os06g11990/LOC_Os06g16300/LOC_Os07g47400/LOC_Os09g35620/LOC_Os11g05470	7
GO:2000026	regulation of multicellular organismal development	7/1602	80/15655	0.86	0.723287	0.820541	LOC_Os06g11990/LOC_Os06g30370/LOC_Os07g07820/LOC_Os09g33850/LOC_Os09g35620/LOC_Os09g39310/LOC_Os11g05470	7
GO:0051649	establishment of localization in cell	7/1602	84/15655	0.81	0.769088	0.852674	LOC_Os01g73280/LOC_Os02g56570/LOC_Os07g47400/LOC_Os09g35620/LOC_Os10g10580/LOC_Os11g05470/LOC_Os12g16290	7
GO:0009059	macromolecule biosynthetic process	7/1602	85/15655	0.8	0.779625	0.852674	LOC_Os01g07260/LOC_Os01g08880/LOC_Os01g73280/LOC_Os05g28040/LOC_Os06g11990/LOC_Os07g07760/LOC_Os11g39710	7
GO:0034645	cellular macromolecule biosynthetic process	7/1602	85/15655	0.8	0.779625	0.852674	LOC_Os01g07260/LOC_Os01g08880/LOC_Os01g73280/LOC_Os05g28040/LOC_Os06g11990/LOC_Os07g07760/LOC_Os11g39710	7
GO:0009314	response to radiation	7/1602	86/15655	0.8	0.7898	0.862256	LOC_Os01g55940/LOC_Os01g67850/LOC_Os03g58040/LOC_Os03g62790/LOC_Os05g28040/LOC_Os07g04730/LOC_Os09g33850	7
GO:0045893	positive regulation of transcription, DNA-templated	7/1602	97/15655	0.71	0.879353	0.926435	LOC_Os01g61080/LOC_Os04g51130/LOC_Os06g10880/LOC_Os06g24070/LOC_Os06g50480/LOC_Os06g50600/LOC_Os09g35620	7
GO:0010467	gene expression	7/1602	119/15655	0.57	0.966275	0.98524	LOC_Os01g73950/LOC_Os03g53170/LOC_Os04g28310/LOC_Os04g48370/LOC_Os05g28040/LOC_Os07g07760/LOC_Os10g25300	7
GO:0048522	positive regulation of cellular process	7/1602	119/15655	0.57	0.966275	0.98524	LOC_Os01g67850/LOC_Os02g57120/LOC_Os03g03920/LOC_Os04g47700/LOC_Os04g51130/LOC_Os05g50990/LOC_Os09g35620	7
GO:0032446	protein modification by small protein conjugation	7/1602	124/15655	0.55	0.975391	0.991633	LOC_Os01g67850/LOC_Os01g74320/LOC_Os02g52130/LOC_Os04g01160/LOC_Os06g11990/LOC_Os07g07820/LOC_Os08g04130	7
GO:0070647	protein modification by small protein conjugation or removal	7/1602	126/15655	0.54	0.978355	0.992591	LOC_Os01g67850/LOC_Os01g74320/LOC_Os02g52130/LOC_Os04g01160/LOC_Os06g11990/LOC_Os07g07820/LOC_Os08g04130	7
GO:0002252	immune effector process	6/1602	12/15655	4.89	0.000609461	0.0874379	LOC_Os01g67850/LOC_Os03g23050/LOC_Os06g16300/LOC_Os09g35620/LOC_Os11g04600/LOC_Os12g04410	6
GO:0016114	terpenoid biosynthetic process	6/1602	12/15655	4.89	0.000609461	0.0874379	LOC_Os01g58790/LOC_Os02g39160/LOC_Os03g59610/LOC_Os05g33840/LOC_Os07g09190/LOC_Os09g39310	6
GO:0015977	carbon fixation	6/1602	14/15655	4.19	0.00165378	0.18334	LOC_Os01g02050/LOC_Os02g05830/LOC_Os10g21268/LOC_Os12g10580/LOC_Os12g17600/LOC_Os12g19470	6
GO:0043248	proteasome assembly	6/1602	15/15655	3.91	0.00251933	0.245467	LOC_Os02g55670/LOC_Os02g55720/LOC_Os02g55770/LOC_Os03g38720/LOC_Os09g14590/LOC_Os12g05310	6
GO:0032787	monocarboxylic acid metabolic process	6/1602	23/15655	2.55	0.024954	0.33101	LOC_Os01g25360/LOC_Os01g37650/LOC_Os02g51410/LOC_Os03g59610/LOC_Os04g54800/LOC_Os06g12150	6
GO:0050776	regulation of immune response	6/1602	23/15655	2.55	0.024954	0.33101	LOC_Os01g73280/LOC_Os02g31160/LOC_Os06g11990/LOC_Os10g38930/LOC_Os11g04600/LOC_Os12g04410	6
GO:0005992	trehalose biosynthetic process	6/1602	26/15655	2.26	0.043763	0.33101	LOC_Os02g54820/LOC_Os08g31630/LOC_Os08g34580/LOC_Os09g20390/LOC_Os09g23350/LOC_Os10g40550	6
GO:0009856	pollination	6/1602	26/15655	2.26	0.043763	0.33101	LOC_Os03g18200/LOC_Os04g34670/LOC_Os06g11990/LOC_Os06g20440/LOC_Os06g46754/LOC_Os12g40260	6
GO:0044706	multi-multicellular organism process	6/1602	26/15655	2.26	0.043763	0.33101	LOC_Os03g18200/LOC_Os04g34670/LOC_Os06g11990/LOC_Os06g20440/LOC_Os06g46754/LOC_Os12g40260	6
GO:0045087	innate immune response	6/1602	29/15655	2.02	0.0695929	0.33101	LOC_Os01g25360/LOC_Os01g37650/LOC_Os03g23050/LOC_Os07g04730/LOC_Os11g04600/LOC_Os12g04410	6
GO:0044283	small molecule biosynthetic process	6/1602	31/15655	1.89	0.0908003	0.33101	LOC_Os02g51410/LOC_Os02g57400/LOC_Os03g59610/LOC_Os04g54800/LOC_Os06g12150/LOC_Os09g39310	6
GO:0030162	regulation of proteolysis	6/1602	32/15655	1.83	0.102575	0.331357	LOC_Os02g51350/LOC_Os03g03920/LOC_Os03g62790/LOC_Os08g13130/LOC_Os11g04600/LOC_Os12g04410	6
GO:0051049	regulation of transport	6/1602	33/15655	1.78	0.115104	0.363707	LOC_Os02g56570/LOC_Os03g03920/LOC_Os04g47700/LOC_Os09g35620/LOC_Os11g29350/LOC_Os12g08670	6
GO:0090698	post-embryonic plant morphogenesis	6/1602	36/15655	1.63	0.156936	0.424026	LOC_Os05g28040/LOC_Os07g05470/LOC_Os11g04600/LOC_Os12g04410/Oryza_sativa_newGene_3279/Oryza_sativa_newGene_3643	6
GO:0009636	response to toxic substance	6/1602	37/15655	1.58	0.172178	0.424026	LOC_Os01g58194/LOC_Os02g11720/LOC_Os02g53400/LOC_Os03g57200/LOC_Os04g17660/LOC_Os12g41590	6
GO:0046777	protein autophosphorylation	6/1602	37/15655	1.58	0.172178	0.424026	LOC_Os04g43710/LOC_Os04g52640/LOC_Os06g16300/LOC_Os06g38650/LOC_Os09g39310/LOC_Os12g40260	6
GO:0048646	anatomical structure formation involved in morphogenesis	6/1602	39/15655	1.5	0.204357	0.443825	LOC_Os01g42090/LOC_Os06g11990/LOC_Os09g35620/LOC_Os10g03400/LOC_Os11g04600/LOC_Os12g04410	6
GO:0008610	lipid biosynthetic process	6/1602	43/15655	1.36	0.274168	0.503188	LOC_Os01g08760/LOC_Os03g59610/LOC_Os04g39780/LOC_Os06g44300/LOC_Os07g10130/LOC_Os09g39310	6
GO:0009909	regulation of flower development	6/1602	43/15655	1.36	0.274168	0.503188	LOC_Os01g15340/LOC_Os01g70260/LOC_Os01g70730/LOC_Os02g12790/LOC_Os09g33850/LOC_Os11g05470	6
GO:0045934	negative regulation of nucleobase-containing compound metabolic process	6/1602	44/15655	1.33	0.292464	0.527592	LOC_Os01g67850/LOC_Os01g73280/LOC_Os02g31160/LOC_Os04g32480/LOC_Os07g05830/LOC_Os09g35620	6
GO:0010558	negative regulation of macromolecule biosynthetic process	6/1602	48/15655	1.22	0.367503	0.59085	LOC_Os01g67850/LOC_Os01g73280/LOC_Os02g31160/LOC_Os04g32480/LOC_Os07g05830/LOC_Os09g35620	6
GO:0031347	regulation of defense response	6/1602	49/15655	1.2	0.386482	0.610481	LOC_Os01g73280/LOC_Os04g32480/LOC_Os07g05830/LOC_Os10g38930/LOC_Os11g04600/LOC_Os12g04410	6
GO:0031327	negative regulation of cellular biosynthetic process	6/1602	51/15655	1.15	0.424382	0.620531	LOC_Os01g67850/LOC_Os01g73280/LOC_Os02g31160/LOC_Os04g32480/LOC_Os07g05830/LOC_Os09g35620	6
GO:0009890	negative regulation of biosynthetic process	6/1602	52/15655	1.13	0.44322	0.642299	LOC_Os01g67850/LOC_Os01g73280/LOC_Os02g31160/LOC_Os04g32480/LOC_Os07g05830/LOC_Os09g35620	6
GO:0022622	root system development	6/1602	52/15655	1.13	0.44322	0.642299	LOC_Os04g01160/LOC_Os05g32070/LOC_Os07g05470/LOC_Os10g10580/Oryza_sativa_newGene_3279/Oryza_sativa_newGene_3643	6
GO:0000278	mitotic cell cycle	6/1602	55/15655	1.07	0.498821	0.673643	LOC_Os01g73280/LOC_Os02g57120/LOC_Os04g42330/LOC_Os06g11990/LOC_Os09g35620/LOC_Os12g40260	6
GO:0006259	DNA metabolic process	6/1602	58/15655	1.01	0.552367	0.711946	LOC_Os01g07260/LOC_Os01g08880/LOC_Os01g67850/LOC_Os01g73280/LOC_Os09g25550/LOC_Os11g39710	6
GO:0043933	macromolecular complex subunit organization	6/1602	58/15655	1.01	0.552367	0.711946	LOC_Os01g42090/LOC_Os01g67850/LOC_Os02g57120/LOC_Os03g03920/LOC_Os09g35620/LOC_Os12g40260	6
GO:0006260	DNA replication	6/1602	59/15655	0.99	0.569629	0.719812	LOC_Os01g07260/LOC_Os01g08880/LOC_Os04g29424/LOC_Os04g48060/LOC_Os05g37980/LOC_Os08g02670	6
GO:0006325	chromatin organization	6/1602	60/15655	0.98	0.586559	0.726186	LOC_Os01g67850/LOC_Os03g05100/LOC_Os03g23050/LOC_Os04g01130/LOC_Os07g36130/LOC_Os09g35620	6
GO:1901566	organonitrogen compound biosynthetic process	6/1602	69/15655	0.85	0.721544	0.820541	LOC_Os01g08760/LOC_Os02g51410/LOC_Os03g59610/LOC_Os04g54800/LOC_Os06g12150/LOC_Os07g07760	6
GO:0051301	cell division	6/1602	70/15655	0.84	0.734451	0.8293	LOC_Os03g05300/LOC_Os06g11990/LOC_Os08g29680/LOC_Os12g24320/LOC_Os12g28710/LOC_Os12g40260	6
GO:0009658	chloroplast organization	6/1602	72/15655	0.81	0.758974	0.845327	LOC_Os01g08880/LOC_Os02g12790/LOC_Os04g43420/LOC_Os05g34160/LOC_Os08g41690/LOC_Os12g01449	6
GO:0009651	response to salt stress	6/1602	73/15655	0.8	0.770594	0.852674	LOC_Os02g43470/LOC_Os02g51710/LOC_Os03g48010/LOC_Os03g58040/LOC_Os04g45970/LOC_Os05g50990	6
GO:0032268	regulation of cellular protein metabolic process	6/1602	75/15655	0.78	0.792569	0.864118	LOC_Os03g03920/LOC_Os03g62790/LOC_Os04g31340/LOC_Os06g42824/LOC_Os09g25550/LOC_Os09g35620	6
GO:0006357	regulation of transcription from RNA polymerase II promoter	6/1602	76/15655	0.77	0.802933	0.866127	LOC_Os01g67850/LOC_Os02g49640/LOC_Os02g53230/LOC_Os09g25550/LOC_Os09g35620/LOC_Os10g25300	6
GO:0051128	regulation of cellular component organization	6/1602	77/15655	0.76	0.812892	0.875707	LOC_Os02g56570/LOC_Os02g57120/LOC_Os06g11990/LOC_Os09g35620/LOC_Os11g29350/LOC_Os12g08670	6
GO:0009765	photosynthesis, light harvesting	5/1602	8/15655	6.11	0.00047899	0.0826511	LOC_Os01g41710/LOC_Os03g39610/LOC_Os06g21590/LOC_Os09g17740/LOC_Os11g13890	5
GO:0045492	xylan biosynthetic process	5/1602	13/15655	3.76	0.00710342	0.33101	LOC_Os03g08600/LOC_Os03g18120/LOC_Os05g37530/LOC_Os06g47310/LOC_Os12g10320	5
GO:0009691	cytokinin biosynthetic process	5/1602	16/15655	3.05	0.0185967	0.33101	LOC_Os02g41770/LOC_Os03g01880/LOC_Os03g64070/LOC_Os05g24660/LOC_Os09g37540	5
GO:0031408	oxylipin biosynthetic process	5/1602	16/15655	3.05	0.0185967	0.33101	LOC_Os02g10120/LOC_Os03g49350/LOC_Os03g49380/LOC_Os12g37260/LOC_Os12g37350	5
GO:0015995	chlorophyll biosynthetic process	5/1602	17/15655	2.87	0.0241754	0.33101	LOC_Os01g17170/LOC_Os02g45660/LOC_Os03g20700/LOC_Os04g58200/LOC_Os10g35370	5
GO:0009627	systemic acquired resistance	5/1602	19/15655	2.57	0.0382871	0.33101	LOC_Os01g25360/LOC_Os01g37650/LOC_Os07g04730/LOC_Os07g18990/LOC_Os07g47590	5
GO:0009073	aromatic amino acid family biosynthetic process	5/1602	21/15655	2.33	0.0565385	0.33101	LOC_Os02g51410/LOC_Os04g54800/LOC_Os06g12150/LOC_Os08g37790/LOC_Os09g36800	5
GO:0098754	detoxification	5/1602	21/15655	2.33	0.0565385	0.33101	LOC_Os01g58194/LOC_Os02g53400/LOC_Os03g57200/LOC_Os04g17660/LOC_Os12g41590	5
GO:1900150	regulation of defense response to fungus	5/1602	21/15655	2.33	0.0565385	0.33101	LOC_Os02g53160/LOC_Os04g38480/LOC_Os05g50910/LOC_Os06g33320/LOC_Os07g48280	5
GO:0006541	glutamine metabolic process	5/1602	22/15655	2.22	0.0672432	0.33101	LOC_Os01g04620/LOC_Os02g08270/LOC_Os03g18130/LOC_Os04g38950/LOC_Os09g25610	5
GO:0016053	organic acid biosynthetic process	5/1602	22/15655	2.22	0.0672432	0.33101	LOC_Os02g51410/LOC_Os03g59610/LOC_Os04g54800/LOC_Os06g12150/LOC_Os09g39310	5
GO:0046394	carboxylic acid biosynthetic process	5/1602	22/15655	2.22	0.0672432	0.33101	LOC_Os02g51410/LOC_Os03g59610/LOC_Os04g54800/LOC_Os06g12150/LOC_Os09g39310	5
GO:0048232	male gamete generation	5/1602	22/15655	2.22	0.0672432	0.33101	LOC_Os01g67850/LOC_Os01g73560/LOC_Os03g23050/LOC_Os07g05470/Oryza_sativa_newGene_3643	5
GO:0046274	lignin catabolic process	5/1602	23/15655	2.12	0.0789902	0.33101	LOC_Os01g63190/LOC_Os02g51440/LOC_Os11g16260/LOC_Os11g42200/LOC_Os12g15680	5
GO:0048868	pollen tube development	5/1602	23/15655	2.12	0.0789902	0.33101	LOC_Os03g18200/LOC_Os04g34670/LOC_Os06g11990/LOC_Os06g20440/LOC_Os06g46754	5
GO:0009739	response to gibberellin	5/1602	25/15655	1.95	0.105513	0.338161	LOC_Os01g09280/LOC_Os01g61080/LOC_Os02g12790/LOC_Os02g53530/LOC_Os03g11680	5
GO:0019748	secondary metabolic process	5/1602	25/15655	1.95	0.105513	0.338161	LOC_Os03g57200/LOC_Os11g24180/LOC_Os12g16220/LOC_Os12g16240/LOC_Os12g16250	5
GO:0030245	cellulose catabolic process	5/1602	26/15655	1.88	0.120215	0.366999	LOC_Os02g50490/LOC_Os04g41970/LOC_Os04g57860/LOC_Os05g12150/LOC_Os06g13830	5
GO:0009553	embryo sac development	5/1602	29/15655	1.68	0.169479	0.424026	LOC_Os03g23050/LOC_Os03g32526/LOC_Os04g34670/LOC_Os06g20440/LOC_Os09g10850	5
GO:0070925	organelle assembly	5/1602	30/15655	1.63	0.187414	0.424026	LOC_Os01g73560/LOC_Os03g03920/LOC_Os06g42824/LOC_Os07g05470/Oryza_sativa_newGene_3643	5
GO:0010817	regulation of hormone levels	5/1602	33/15655	1.48	0.244796	0.503188	LOC_Os01g25360/LOC_Os01g37650/LOC_Os03g53990/LOC_Os08g04130/LOC_Os09g39310	5
GO:0009968	negative regulation of signal transduction	5/1602	34/15655	1.44	0.264871	0.503188	LOC_Os01g73280/LOC_Os02g53530/LOC_Os03g11680/LOC_Os09g35620/LOC_Os09g39310	5
GO:0071396	cellular response to lipid	5/1602	34/15655	1.44	0.264871	0.503188	LOC_Os02g53530/LOC_Os03g11680/LOC_Os03g62790/LOC_Os05g50990/LOC_Os09g35620	5
GO:0010648	negative regulation of cell communication	5/1602	35/15655	1.4	0.285296	0.515424	LOC_Os01g73280/LOC_Os02g53530/LOC_Os03g11680/LOC_Os09g35620/LOC_Os09g39310	5
GO:0023057	negative regulation of signaling	5/1602	35/15655	1.4	0.285296	0.515424	LOC_Os01g73280/LOC_Os02g53530/LOC_Os03g11680/LOC_Os09g35620/LOC_Os09g39310	5
GO:0043086	negative regulation of catalytic activity	5/1602	36/15655	1.36	0.306	0.549555	LOC_Os01g73280/LOC_Os03g62790/LOC_Os05g01380/LOC_Os06g49760/LOC_Os12g18560	5
GO:0031399	regulation of protein modification process	5/1602	37/15655	1.32	0.326909	0.567741	LOC_Os03g03920/LOC_Os04g31340/LOC_Os06g42824/LOC_Os09g25550/LOC_Os09g35620	5
GO:1902679	negative regulation of RNA biosynthetic process	5/1602	38/15655	1.29	0.347956	0.567741	LOC_Os01g67850/LOC_Os02g31160/LOC_Os04g32480/LOC_Os07g05830/LOC_Os09g35620	5
GO:0051253	negative regulation of RNA metabolic process	5/1602	39/15655	1.25	0.369074	0.591831	LOC_Os01g67850/LOC_Os02g31160/LOC_Os04g32480/LOC_Os07g05830/LOC_Os09g35620	5
GO:1903507	negative regulation of nucleic acid-templated transcription	5/1602	39/15655	1.25	0.369074	0.591831	LOC_Os01g67850/LOC_Os02g31160/LOC_Os04g32480/LOC_Os07g05830/LOC_Os09g35620	5
GO:0003002	regionalization	5/1602	40/15655	1.22	0.390198	0.610481	LOC_Os03g53990/LOC_Os05g50990/LOC_Os09g35620/LOC_Os11g04600/LOC_Os12g04410	5
GO:0044255	cellular lipid metabolic process	5/1602	40/15655	1.22	0.390198	0.610481	LOC_Os01g08760/LOC_Os03g51670/LOC_Os03g59610/LOC_Os07g29220/LOC_Os09g39310	5
GO:0060560	developmental growth involved in morphogenesis	5/1602	40/15655	1.22	0.390198	0.610481	LOC_Os02g57120/LOC_Os03g18200/LOC_Os06g46754/LOC_Os09g35620/Oryza_sativa_newGene_3279	5
GO:0000160	phosphorelay signal transduction system	5/1602	42/15655	1.16	0.432231	0.62899	LOC_Os01g72330/LOC_Os07g49460/LOC_Os09g36220/LOC_Os11g05930/LOC_Os12g04500	5
GO:0015986	ATP synthesis coupled proton transport	5/1602	44/15655	1.11	0.473613	0.650782	LOC_Os01g58010/LOC_Os03g55874/LOC_Os07g32880/LOC_Os10g38272/LOC_Os12g10570	5
GO:0007389	pattern specification process	5/1602	45/15655	1.09	0.493941	0.671139	LOC_Os03g53990/LOC_Os05g50990/LOC_Os09g35620/LOC_Os11g04600/LOC_Os12g04410	5
GO:0042592	homeostatic process	5/1602	46/15655	1.06	0.513968	0.686928	LOC_Os01g55940/LOC_Os02g53400/LOC_Os06g21550/LOC_Os09g09930/LOC_Os09g35620	5
GO:0048366	leaf development	5/1602	46/15655	1.06	0.513968	0.686928	LOC_Os03g53990/LOC_Os05g05600/LOC_Os07g49114/LOC_Os11g04600/LOC_Os12g04410	5
GO:0009620	response to fungus	5/1602	48/15655	1.02	0.55298	0.712085	LOC_Os01g25360/LOC_Os01g37650/LOC_Os02g39280/LOC_Os03g60220/LOC_Os07g49114	5
GO:0048589	developmental growth	5/1602	50/15655	0.98	0.590394	0.730193	LOC_Os02g57120/LOC_Os03g18200/LOC_Os06g46754/LOC_Os09g35620/Oryza_sativa_newGene_3279	5
GO:0009826	unidimensional cell growth	5/1602	53/15655	0.92	0.643108	0.770765	LOC_Os02g57120/LOC_Os03g18200/LOC_Os06g46754/LOC_Os09g35620/Oryza_sativa_newGene_3279	5
GO:0042545	cell wall modification	5/1602	53/15655	0.92	0.643108	0.770765	LOC_Os01g42090/LOC_Os03g28090/LOC_Os05g29790/LOC_Os08g34910/LOC_Os12g28015	5
GO:0009266	response to temperature stimulus	5/1602	58/15655	0.84	0.720953	0.820541	LOC_Os02g51710/LOC_Os03g18200/LOC_Os03g57200/LOC_Os03g59610/LOC_Os07g33350	5
GO:0033043	regulation of organelle organization	5/1602	60/15655	0.81	0.748456	0.841288	LOC_Os02g56570/LOC_Os02g57120/LOC_Os06g11990/LOC_Os09g35620/LOC_Os11g29350	5
GO:0009790	embryo development	5/1602	64/15655	0.76	0.797313	0.865629	LOC_Os01g73280/LOC_Os02g56820/LOC_Os09g35620/LOC_Os11g43800/LOC_Os12g42120	5
GO:0009414	response to water deprivation	5/1602	70/15655	0.7	0.856205	0.909866	LOC_Os02g51710/LOC_Os03g57200/LOC_Os03g59610/LOC_Os06g11990/LOC_Os11g06720	5
GO:0051276	chromosome organization	5/1602	82/15655	0.6	0.931824	0.96122	LOC_Os01g07260/LOC_Os01g08880/LOC_Os01g67850/LOC_Os03g23050/LOC_Os09g35620	5
GO:0009793	embryo development ending in seed dormancy	5/1602	101/15655	0.48	0.981609	0.993373	LOC_Os01g65090/LOC_Os02g56820/LOC_Os11g29380/LOC_Os11g43800/LOC_Os12g42120	5
GO:0016192	vesicle-mediated transport	5/1602	132/15655	0.37	0.998292	0.995083	LOC_Os09g35620/LOC_Os10g03400/LOC_Os10g10580/LOC_Os10g22330/LOC_Os12g44250	5
GO:0051502	diterpene phytoalexin biosynthetic process	4/1602	4/15655	9.77	0.000109289	0.0222125	LOC_Os02g36030/LOC_Os02g36070/LOC_Os02g36280/LOC_Os06g37300	4
GO:0080163	regulation of protein serine/threonine phosphatase activity	4/1602	6/15655	6.51	0.00138291	0.168643	LOC_Os12g36840/LOC_Os12g36850/LOC_Os12g36860/LOC_Os12g36880	4
GO:0006995	cellular response to nitrogen starvation	4/1602	7/15655	5.58	0.00296517	0.253042	LOC_Os02g43470/LOC_Os03g58040/LOC_Os04g45970/LOC_Os04g58390	4
GO:0006094	gluconeogenesis	4/1602	9/15655	4.34	0.009023	0.33101	LOC_Os01g62420/LOC_Os03g15050/LOC_Os08g37380/LOC_Os10g13700	4
GO:0007283	spermatogenesis	4/1602	9/15655	4.34	0.009023	0.33101	LOC_Os01g67850/LOC_Os01g73560/LOC_Os07g05470/Oryza_sativa_newGene_3643	4
GO:0045089	positive regulation of innate immune response	4/1602	9/15655	4.34	0.009023	0.33101	LOC_Os04g38480/LOC_Os10g38930/LOC_Os11g04600/LOC_Os12g04410	4
GO:0001678	cellular glucose homeostasis	4/1602	10/15655	3.91	0.0138333	0.33101	LOC_Os01g09460/LOC_Os01g52450/LOC_Os05g09500/LOC_Os07g09890	4
GO:0006090	pyruvate metabolic process	4/1602	10/15655	3.91	0.0138333	0.33101	LOC_Os03g31750/LOC_Os05g09440/LOC_Os05g33570/LOC_Os06g01630	4
GO:0045732	positive regulation of protein catabolic process	4/1602	10/15655	3.91	0.0138333	0.33101	LOC_Os01g71590/LOC_Os03g03920/LOC_Os11g11240/LOC_Os12g02660	4
GO:0048653	anther development	4/1602	10/15655	3.91	0.0138333	0.33101	LOC_Os05g32070/LOC_Os06g11990/LOC_Os07g37920/LOC_Os09g31390	4
GO:0080142	regulation of salicylic acid biosynthetic process	4/1602	10/15655	3.91	0.0138333	0.33101	LOC_Os11g44310/LOC_Os11g44680/LOC_Os12g36920/LOC_Os12g36940	4
GO:0008652	cellular amino acid biosynthetic process	4/1602	11/15655	3.55	0.0200032	0.33101	LOC_Os02g51410/LOC_Os03g59610/LOC_Os04g54800/LOC_Os06g12150	4
GO:0010167	response to nitrate	4/1602	11/15655	3.55	0.0200032	0.33101	LOC_Os01g25500/LOC_Os02g43770/LOC_Os07g47590/LOC_Os10g40600	4
GO:0016104	triterpenoid biosynthetic process	4/1602	11/15655	3.55	0.0200032	0.33101	LOC_Os11g08569/LOC_Os11g18194/LOC_Os11g18366/LOC_Os11g35710	4
GO:0008283	cell proliferation	4/1602	12/15655	3.26	0.0276203	0.33101	LOC_Os03g12990/LOC_Os07g03200/LOC_Os09g35620/LOC_Os12g05260	4
GO:0046470	phosphatidylcholine metabolic process	4/1602	12/15655	3.26	0.0276203	0.33101	LOC_Os01g08760/LOC_Os05g07880/LOC_Os07g15680/LOC_Os09g37100	4
GO:0000079	regulation of cyclin-dependent protein serine/threonine kinase activity	4/1602	13/15655	3.01	0.0367389	0.33101	LOC_Os02g43550/LOC_Os05g25950/LOC_Os09g25550/LOC_Os10g41430	4
GO:0009082	branched-chain amino acid biosynthetic process	4/1602	13/15655	3.01	0.0367389	0.33101	LOC_Os02g05780/LOC_Os03g01600/LOC_Os10g40200/LOC_Os11g14950	4
GO:0009853	photorespiration	4/1602	13/15655	3.01	0.0367389	0.33101	LOC_Os01g48990/LOC_Os02g05830/LOC_Os12g17600/LOC_Os12g19470	4
GO:0006298	mismatch repair	4/1602	14/15655	2.79	0.047382	0.33101	LOC_Os01g08540/LOC_Os07g30240/LOC_Os09g24220/LOC_Os11g05570	4
GO:0040011	locomotion	4/1602	14/15655	2.79	0.047382	0.33101	LOC_Os04g34670/LOC_Os06g20440/LOC_Os09g35620/LOC_Os11g29350	4
GO:0120036	plasma membrane bounded cell projection organization	4/1602	14/15655	2.79	0.047382	0.33101	LOC_Os01g73560/LOC_Os07g05470/LOC_Os09g35620/Oryza_sativa_newGene_3643	4
GO:0002229	defense response to oomycetes	4/1602	15/15655	2.61	0.0595439	0.33101	LOC_Os07g03790/LOC_Os08g03240/LOC_Os09g16950/LOC_Os10g30540	4
GO:0002683	negative regulation of immune system process	4/1602	15/15655	2.61	0.0595439	0.33101	LOC_Os01g73280/LOC_Os02g31160/LOC_Os06g11990/LOC_Os09g35620	4
GO:0016126	sterol biosynthetic process	4/1602	15/15655	2.61	0.0595439	0.33101	LOC_Os01g25189/LOC_Os03g01820/LOC_Os03g02710/LOC_Os11g32240	4
GO:0030030	cell projection organization	4/1602	15/15655	2.61	0.0595439	0.33101	LOC_Os01g73560/LOC_Os07g05470/LOC_Os09g35620/Oryza_sativa_newGene_3643	4
GO:0022411	cellular component disassembly	4/1602	16/15655	2.44	0.073193	0.33101	LOC_Os01g73280/LOC_Os03g03920/LOC_Os09g35620/LOC_Os12g40260	4
GO:0042445	hormone metabolic process	4/1602	16/15655	2.44	0.073193	0.33101	LOC_Os01g25360/LOC_Os01g37650/LOC_Os08g04130/LOC_Os09g39310	4
GO:0045088	regulation of innate immune response	4/1602	17/15655	2.3	0.0882753	0.33101	LOC_Os01g73280/LOC_Os10g38930/LOC_Os11g04600/LOC_Os12g04410	4
GO:0098869	cellular oxidant detoxification	4/1602	17/15655	2.3	0.0882753	0.33101	LOC_Os01g58194/LOC_Os02g03710/LOC_Os02g53400/LOC_Os10g36580	4
GO:0009735	response to cytokinin	4/1602	18/15655	2.17	0.104718	0.336942	LOC_Os02g12790/LOC_Os02g53530/LOC_Os03g11680/LOC_Os03g57200	4
GO:0034599	cellular response to oxidative stress	4/1602	18/15655	2.17	0.104718	0.336942	LOC_Os02g53400/LOC_Os05g05600/LOC_Os07g48960/LOC_Os09g35620	4
GO:0045489	pectin biosynthetic process	4/1602	18/15655	2.17	0.104718	0.336942	LOC_Os01g52710/LOC_Os02g29530/LOC_Os03g18120/LOC_Os06g51160	4
GO:0009615	response to virus	4/1602	19/15655	2.06	0.122433	0.370941	LOC_Os01g73280/LOC_Os03g23050/LOC_Os06g16300/LOC_Os07g04730	4
GO:0009814	defense response, incompatible interaction	4/1602	19/15655	2.06	0.122433	0.370941	LOC_Os01g25360/LOC_Os01g37650/LOC_Os03g23050/LOC_Os07g04730	4
GO:0019252	starch biosynthetic process	4/1602	19/15655	2.06	0.122433	0.370941	LOC_Os01g52250/LOC_Os02g51070/LOC_Os05g50380/Oryza_sativa_newGene_1997	4
GO:0060627	regulation of vesicle-mediated transport	4/1602	19/15655	2.06	0.122433	0.370941	LOC_Os02g56570/LOC_Os04g47700/LOC_Os11g29350/LOC_Os12g08670	4
GO:0051493	regulation of cytoskeleton organization	4/1602	20/15655	1.95	0.14132	0.420844	LOC_Os02g57120/LOC_Os06g11990/LOC_Os09g35620/LOC_Os11g29350	4
GO:1902531	regulation of intracellular signal transduction	4/1602	20/15655	1.95	0.14132	0.420844	LOC_Os01g73280/LOC_Os03g03920/LOC_Os09g35620/LOC_Os09g39310	4
GO:0009744	response to sucrose	4/1602	21/15655	1.86	0.161268	0.424026	LOC_Os05g02060/LOC_Os05g04220/LOC_Os09g39310/LOC_Os11g05470	4
GO:0032196	transposition	4/1602	22/15655	1.78	0.182162	0.424026	LOC_Os03g42670/LOC_Os09g17930/LOC_Os10g33750/LOC_Os11g39710	4
GO:0042026	protein refolding	4/1602	22/15655	1.78	0.182162	0.424026	ChrSy.fgenesh.gene.28/LOC_Os01g62290/LOC_Os11g47760/Oryza_sativa_newGene_2305	4
GO:0046856	phosphatidylinositol dephosphorylation	4/1602	22/15655	1.78	0.182162	0.424026	LOC_Os01g08780/LOC_Os03g06460/LOC_Os03g13520/LOC_Os11g20384	4
GO:0051338	regulation of transferase activity	4/1602	22/15655	1.78	0.182162	0.424026	LOC_Os01g73280/LOC_Os04g31340/LOC_Os09g25550/LOC_Os09g35620	4
GO:0040029	regulation of gene expression, epigenetic	4/1602	23/15655	1.7	0.203883	0.443586	LOC_Os03g23050/LOC_Os04g48370/LOC_Os09g35620/LOC_Os12g16290	4
GO:0007623	circadian rhythm	4/1602	24/15655	1.63	0.226308	0.488454	LOC_Os01g01340/LOC_Os01g17396/LOC_Os02g51760/LOC_Os05g22614	4
GO:0009753	response to jasmonic acid	4/1602	24/15655	1.63	0.226308	0.488454	LOC_Os05g02060/LOC_Os08g04130/LOC_Os11g04600/LOC_Os12g04410	4
GO:0006313	transposition, DNA-mediated	4/1602	25/15655	1.56	0.249317	0.503188	LOC_Os06g33040/Oryza_sativa_newGene_1585/Oryza_sativa_newGene_4414/Oryza_sativa_newGene_455	4
GO:0022412	cellular process involved in reproduction in multicellular organism	4/1602	27/15655	1.45	0.296611	0.533889	LOC_Os01g67850/LOC_Os03g23050/LOC_Os09g35620/LOC_Os12g16290	4
GO:0051241	negative regulation of multicellular organismal process	4/1602	27/15655	1.45	0.296611	0.533889	LOC_Os01g73280/LOC_Os06g16300/LOC_Os09g35620/LOC_Os11g05470	4
GO:0048193	Golgi vesicle transport	4/1602	28/15655	1.4	0.32067	0.564691	LOC_Os03g10310/LOC_Os08g14640/LOC_Os10g03400/LOC_Os10g10580	4
GO:0034976	response to endoplasmic reticulum stress	4/1602	29/15655	1.35	0.344861	0.567741	LOC_Os01g73280/LOC_Os03g03920/LOC_Os06g11740/LOC_Os07g44950	4
GO:0044092	negative regulation of molecular function	4/1602	30/15655	1.3	0.369083	0.591831	LOC_Os01g73280/LOC_Os03g03920/LOC_Os03g62790/LOC_Os05g01380	4
GO:0051336	regulation of hydrolase activity	4/1602	30/15655	1.3	0.369083	0.591831	LOC_Os02g56570/LOC_Os03g62790/LOC_Os04g47700/LOC_Os06g42824	4
GO:0010016	shoot system morphogenesis	4/1602	31/15655	1.26	0.393245	0.610481	LOC_Os03g53990/LOC_Os11g04600/LOC_Os12g04410/Oryza_sativa_newGene_3279	4
GO:0071669	plant-type cell wall organization or biogenesis	4/1602	31/15655	1.26	0.393245	0.610481	LOC_Os06g11990/LOC_Os07g41360/LOC_Os12g36890/Oryza_sativa_newGene_3279	4
GO:0010015	root morphogenesis	4/1602	32/15655	1.22	0.417259	0.610481	LOC_Os07g05470/LOC_Os10g10580/Oryza_sativa_newGene_3279/Oryza_sativa_newGene_3643	4
GO:0019220	regulation of phosphate metabolic process	4/1602	32/15655	1.22	0.417259	0.610481	LOC_Os04g31340/LOC_Os06g42824/LOC_Os09g25550/LOC_Os09g35620	4
GO:0051174	regulation of phosphorus metabolic process	4/1602	32/15655	1.22	0.417259	0.610481	LOC_Os04g31340/LOC_Os06g42824/LOC_Os09g25550/LOC_Os09g35620	4
GO:0009845	seed germination	4/1602	33/15655	1.18	0.441047	0.639911	LOC_Os01g72350/LOC_Os03g16170/LOC_Os03g48010/LOC_Os04g28310	4
GO:0048437	floral organ development	4/1602	34/15655	1.15	0.464537	0.650782	LOC_Os05g32070/LOC_Os06g11990/LOC_Os11g04600/LOC_Os12g04410	4
GO:0071496	cellular response to external stimulus	4/1602	34/15655	1.15	0.464537	0.650782	LOC_Os01g01650/LOC_Os03g57200/LOC_Os03g58040/LOC_Os09g35620	4
GO:2000113	negative regulation of cellular macromolecule biosynthetic process	4/1602	35/15655	1.12	0.487665	0.662981	LOC_Os01g67850/LOC_Os01g73280/LOC_Os02g31160/LOC_Os09g35620	4
GO:2000241	regulation of reproductive process	4/1602	36/15655	1.09	0.510373	0.686203	LOC_Os06g11990/LOC_Os09g33850/LOC_Os09g35620/LOC_Os11g05470	4
GO:0008380	RNA splicing	4/1602	38/15655	1.03	0.554335	0.713453	LOC_Os01g73604/LOC_Os01g73950/LOC_Os02g26349/LOC_Os03g49430	4
GO:0090558	plant epidermis development	4/1602	39/15655	1	0.575507	0.719812	LOC_Os02g53530/LOC_Os03g11680/LOC_Os10g10580/Oryza_sativa_newGene_3279	4
GO:0090567	reproductive shoot system development	4/1602	40/15655	0.98	0.596097	0.733897	LOC_Os05g32070/LOC_Os06g11990/LOC_Os11g04600/LOC_Os12g04410	4
GO:0006099	tricarboxylic acid cycle	4/1602	41/15655	0.95	0.616079	0.74795	LOC_Os01g02050/LOC_Os01g16900/LOC_Os02g10070/LOC_Os08g33720	4
GO:0071554	cell wall organization or biogenesis	4/1602	42/15655	0.93	0.635431	0.763064	LOC_Os01g42090/LOC_Os06g11990/LOC_Os06g33330/Oryza_sativa_newGene_3279	4
GO:0014070	response to organic cyclic compound	4/1602	43/15655	0.91	0.654139	0.772093	LOC_Os03g60220/LOC_Os04g48370/LOC_Os05g50990/LOC_Os09g35620	4
GO:0009415	response to water	4/1602	44/15655	0.89	0.672192	0.783671	LOC_Os02g51710/LOC_Os03g57200/LOC_Os03g59610/LOC_Os06g11990	4
GO:0051726	regulation of cell cycle	4/1602	44/15655	0.89	0.672192	0.783671	LOC_Os01g08880/LOC_Os01g48700/LOC_Os09g25550/LOC_Os09g35620	4
GO:1903047	mitotic cell cycle process	4/1602	44/15655	0.89	0.672192	0.783671	LOC_Os01g73280/LOC_Os06g11990/LOC_Os09g35620/LOC_Os12g40260	4
GO:0033365	protein localization to organelle	4/1602	46/15655	0.85	0.706307	0.808375	LOC_Os06g11990/LOC_Os06g16300/LOC_Os07g47400/LOC_Os11g05470	4
GO:0042493	response to drug	4/1602	46/15655	0.85	0.706307	0.808375	LOC_Os02g11720/LOC_Os03g60220/LOC_Os07g49114/LOC_Os09g35620	4
GO:0042546	cell wall biogenesis	4/1602	47/15655	0.83	0.722368	0.820541	LOC_Os02g25630/LOC_Os02g46910/LOC_Os02g52560/LOC_Os06g11990	4
GO:0006974	cellular response to DNA damage stimulus	4/1602	49/15655	0.8	0.75251	0.841288	LOC_Os01g07260/LOC_Os01g67850/LOC_Os01g73280/LOC_Os09g25550	4
GO:0045490	pectin catabolic process	4/1602	50/15655	0.78	0.766607	0.851031	LOC_Os03g28090/LOC_Os04g05050/LOC_Os05g29790/LOC_Os08g34910	4
GO:0018130	heterocycle biosynthetic process	4/1602	53/15655	0.74	0.805134	0.868117	LOC_Os01g73280/LOC_Os03g59610/LOC_Os05g28040/LOC_Os11g39710	4
GO:0009664	plant-type cell wall organization	4/1602	59/15655	0.66	0.866636	0.917396	LOC_Os01g60770/LOC_Os02g22480/LOC_Os06g11990/Oryza_sativa_newGene_3279	4
GO:0009908	flower development	4/1602	59/15655	0.66	0.866636	0.917396	LOC_Os05g32070/LOC_Os06g11990/LOC_Os11g04600/LOC_Os12g04410	4
GO:0015833	peptide transport	4/1602	62/15655	0.63	0.890581	0.931824	LOC_Os01g73280/LOC_Os02g56570/LOC_Os07g47400/LOC_Os11g05470	4
GO:0042886	amide transport	4/1602	62/15655	0.63	0.890581	0.931824	LOC_Os01g73280/LOC_Os02g56570/LOC_Os07g47400/LOC_Os11g05470	4
GO:0010154	fruit development	4/1602	64/15655	0.61	0.904373	0.941407	LOC_Os02g56820/LOC_Os11g43800/LOC_Os12g42120/Oryza_sativa_newGene_3675	4
GO:0045184	establishment of protein localization	4/1602	67/15655	0.58	0.922176	0.955454	LOC_Os01g73280/LOC_Os02g56570/LOC_Os07g47400/LOC_Os11g05470	4
GO:0051173	positive regulation of nitrogen compound metabolic process	4/1602	67/15655	0.58	0.922176	0.955454	LOC_Os01g67850/LOC_Os03g03920/LOC_Os04g51130/LOC_Os09g35620	4
GO:0031325	positive regulation of cellular metabolic process	4/1602	69/15655	0.57	0.932331	0.96122	LOC_Os01g67850/LOC_Os03g03920/LOC_Os04g51130/LOC_Os09g35620	4
GO:0048316	seed development	4/1602	69/15655	0.57	0.932331	0.96122	LOC_Os02g56820/LOC_Os11g43800/LOC_Os12g42120/Oryza_sativa_newGene_3675	4
GO:0010604	positive regulation of macromolecule metabolic process	4/1602	70/15655	0.56	0.936944	0.964202	LOC_Os01g67850/LOC_Os03g03920/LOC_Os04g51130/LOC_Os09g35620	4
GO:0009893	positive regulation of metabolic process	4/1602	80/15655	0.49	0.969605	0.98781	LOC_Os01g67850/LOC_Os03g03920/LOC_Os04g51130/LOC_Os09g35620	4
GO:0044271	cellular nitrogen compound biosynthetic process	4/1602	86/15655	0.45	0.980738	0.993373	LOC_Os01g73280/LOC_Os05g28040/LOC_Os07g07760/LOC_Os11g39710	4
GO:0009875	pollen-pistil interaction	3/1602	4/15655	7.33	0.00395129	0.31087	LOC_Os03g32526/LOC_Os04g34670/LOC_Os06g20440	3
GO:0019632	shikimate metabolic process	3/1602	4/15655	7.33	0.00395129	0.31087	LOC_Os02g51410/LOC_Os04g54800/LOC_Os06g12150	3
GO:0006751	glutathione catabolic process	3/1602	5/15655	5.86	0.0091255	0.33101	LOC_Os01g05810/LOC_Os02g26700/LOC_Os04g37580	3
GO:0009768	photosynthesis, light harvesting in photosystem I	3/1602	5/15655	5.86	0.0091255	0.33101	LOC_Os02g10390/LOC_Os07g38960/LOC_Os08g33820	3
GO:0009806	lignan metabolic process	3/1602	5/15655	5.86	0.0091255	0.33101	LOC_Os12g16220/LOC_Os12g16240/LOC_Os12g16250	3
GO:0009807	lignan biosynthetic process	3/1602	5/15655	5.86	0.0091255	0.33101	LOC_Os12g16220/LOC_Os12g16240/LOC_Os12g16250	3
GO:0009954	proximal/distal pattern formation	3/1602	5/15655	5.86	0.0091255	0.33101	LOC_Os09g35620/LOC_Os11g04600/LOC_Os12g04410	3
GO:0010206	photosystem II repair	3/1602	5/15655	5.86	0.0091255	0.33101	LOC_Os05g33280/LOC_Os06g49160/LOC_Os12g42210	3
GO:0016102	diterpenoid biosynthetic process	3/1602	5/15655	5.86	0.0091255	0.33101	LOC_Os02g36190/LOC_Os09g15050/LOC_Os09g39310	3
GO:0019288	isopentenyl diphosphate biosynthetic process, methylerythritol 4-phosphate pathway	3/1602	5/15655	5.86	0.0091255	0.33101	LOC_Os01g01710/LOC_Os03g52170/LOC_Os11g37330	3
GO:0001510	RNA methylation	3/1602	6/15655	4.89	0.0168681	0.33101	LOC_Os03g27930/LOC_Os03g60750/LOC_Os10g25300	3
GO:0009635	response to herbicide	3/1602	6/15655	4.89	0.0168681	0.33101	LOC_Os03g57200/LOC_Os04g16770/LOC_Os08g35420	3
GO:0009864	induced systemic resistance, jasmonic acid mediated signaling pathway	3/1602	6/15655	4.89	0.0168681	0.33101	LOC_Os05g50890/LOC_Os11g04600/LOC_Os12g04410	3
GO:0035082	axoneme assembly	3/1602	6/15655	4.89	0.0168681	0.33101	LOC_Os01g73560/LOC_Os07g05470/Oryza_sativa_newGene_3643	3
GO:0042537	benzene-containing compound metabolic process	3/1602	6/15655	4.89	0.0168681	0.33101	LOC_Os01g25360/LOC_Os01g37650/LOC_Os03g57200	3
GO:0000162	tryptophan biosynthetic process	3/1602	7/15655	4.19	0.0272953	0.33101	LOC_Os03g03450/LOC_Os03g15780/LOC_Os04g38950	3
GO:0005983	starch catabolic process	3/1602	7/15655	4.19	0.0272953	0.33101	LOC_Os10g41550/LOC_Os12g02120/Oryza_sativa_newGene_1997	3
GO:0009698	phenylpropanoid metabolic process	3/1602	7/15655	4.19	0.0272953	0.33101	LOC_Os12g16220/LOC_Os12g16240/LOC_Os12g16250	3
GO:0009699	phenylpropanoid biosynthetic process	3/1602	7/15655	4.19	0.0272953	0.33101	LOC_Os12g16220/LOC_Os12g16240/LOC_Os12g16250	3
GO:0032984	macromolecular complex disassembly	3/1602	7/15655	4.19	0.0272953	0.33101	LOC_Os03g03920/LOC_Os09g35620/LOC_Os12g40260	3
GO:1902882	regulation of response to oxidative stress	3/1602	7/15655	4.19	0.0272953	0.33101	LOC_Os03g03920/LOC_Os09g35620/LOC_Os12g08670	3
GO:0009072	aromatic amino acid family metabolic process	3/1602	8/15655	3.66	0.0404016	0.33101	LOC_Os02g51410/LOC_Os04g54800/LOC_Os06g12150	3
GO:0009943	adaxial/abaxial axis specification	3/1602	8/15655	3.66	0.0404016	0.33101	LOC_Os02g07760/LOC_Os11g04600/LOC_Os12g04410	3
GO:0010582	floral meristem determinacy	3/1602	8/15655	3.66	0.0404016	0.33101	LOC_Os01g67430/LOC_Os11g04600/LOC_Os12g04410	3
GO:0010927	cellular component assembly involved in morphogenesis	3/1602	8/15655	3.66	0.0404016	0.33101	LOC_Os01g42090/LOC_Os06g11990/LOC_Os10g03400	3
GO:0035194	posttranscriptional gene silencing by RNA	3/1602	8/15655	3.66	0.0404016	0.33101	LOC_Os03g06440/LOC_Os04g48370/LOC_Os12g16290	3
GO:0070507	regulation of microtubule cytoskeleton organization	3/1602	8/15655	3.66	0.0404016	0.33101	LOC_Os02g57120/LOC_Os06g11990/LOC_Os09g35620	3
GO:0001578	microtubule bundle formation	3/1602	9/15655	3.26	0.0560909	0.33101	LOC_Os01g73560/LOC_Os07g05470/Oryza_sativa_newGene_3643	3
GO:0007281	germ cell development	3/1602	9/15655	3.26	0.0560909	0.33101	LOC_Os01g67850/LOC_Os09g35620/LOC_Os12g16290	3
GO:0010212	response to ionizing radiation	3/1602	9/15655	3.26	0.0560909	0.33101	LOC_Os01g67850/LOC_Os09g10850/LOC_Os11g40150	3
GO:0016441	posttranscriptional gene silencing	3/1602	9/15655	3.26	0.0560909	0.33101	LOC_Os03g23050/LOC_Os04g48370/LOC_Os12g16290	3
GO:0044782	cilium organization	3/1602	9/15655	3.26	0.0560909	0.33101	LOC_Os01g73560/LOC_Os07g05470/Oryza_sativa_newGene_3643	3
GO:0060271	cilium assembly	3/1602	9/15655	3.26	0.0560909	0.33101	LOC_Os01g73560/LOC_Os07g05470/Oryza_sativa_newGene_3643	3
GO:0120031	plasma membrane bounded cell projection assembly	3/1602	9/15655	3.26	0.0560909	0.33101	LOC_Os01g73560/LOC_Os07g05470/Oryza_sativa_newGene_3643	3
GO:0002684	positive regulation of immune system process	3/1602	10/15655	2.93	0.0742013	0.33101	LOC_Os10g38930/LOC_Os11g04600/LOC_Os12g04410	3
GO:0030031	cell projection assembly	3/1602	10/15655	2.93	0.0742013	0.33101	LOC_Os01g73560/LOC_Os07g05470/Oryza_sativa_newGene_3643	3
GO:0043631	RNA polyadenylation	3/1602	10/15655	2.93	0.0742013	0.33101	LOC_Os01g50730/LOC_Os02g12460/LOC_Os02g15050	3
GO:0044550	secondary metabolite biosynthetic process	3/1602	10/15655	2.93	0.0742013	0.33101	LOC_Os12g16220/LOC_Os12g16240/LOC_Os12g16250	3
GO:0050778	positive regulation of immune response	3/1602	10/15655	2.93	0.0742013	0.33101	LOC_Os10g38930/LOC_Os11g04600/LOC_Os12g04410	3
GO:0006817	phosphate ion transport	3/1602	11/15655	2.67	0.0945256	0.33101	LOC_Os04g10690/LOC_Os04g10750/LOC_Os05g48390	3
GO:0031122	cytoplasmic microtubule organization	3/1602	11/15655	2.67	0.0945256	0.33101	LOC_Os02g57120/LOC_Os04g42330/LOC_Os06g11990	3
GO:0071395	cellular response to jasmonic acid stimulus	3/1602	11/15655	2.67	0.0945256	0.33101	LOC_Os08g04130/LOC_Os11g04600/LOC_Os12g04410	3
GO:0007143	female meiotic nuclear division	3/1602	12/15655	2.44	0.116827	0.363707	LOC_Os03g23050/LOC_Os03g58600/LOC_Os04g30790	3
GO:0008295	spermidine biosynthetic process	3/1602	12/15655	2.44	0.116827	0.363707	LOC_Os04g42090/LOC_Os06g04070/LOC_Os09g25620	3
GO:0009165	nucleotide biosynthetic process	3/1602	12/15655	2.44	0.116827	0.363707	LOC_Os01g52530/LOC_Os02g03540/LOC_Os06g41360	3
GO:0010051	xylem and phloem pattern formation	3/1602	12/15655	2.44	0.116827	0.363707	LOC_Os03g11650/LOC_Os03g53990/LOC_Os05g50990	3
GO:0010183	pollen tube guidance	3/1602	12/15655	2.44	0.116827	0.363707	LOC_Os03g32526/LOC_Os04g34670/LOC_Os06g20440	3
GO:0015743	malate transport	3/1602	12/15655	2.44	0.116827	0.363707	LOC_Os01g53570/LOC_Os02g45160/LOC_Os10g42180	3
GO:0016125	sterol metabolic process	3/1602	12/15655	2.44	0.116827	0.363707	LOC_Os05g01120/LOC_Os11g37330/Oryza_sativa_newGene_3675	3
GO:0016554	cytidine to uridine editing	3/1602	12/15655	2.44	0.116827	0.363707	LOC_Os04g51280/LOC_Os04g51290/LOC_Os08g04450	3
GO:0032886	regulation of microtubule-based process	3/1602	12/15655	2.44	0.116827	0.363707	LOC_Os02g57120/LOC_Os06g11990/LOC_Os09g35620	3
GO:2000280	regulation of root development	3/1602	12/15655	2.44	0.116827	0.363707	LOC_Os01g15340/LOC_Os06g11990/LOC_Os09g39310	3
GO:0000272	polysaccharide catabolic process	3/1602	13/15655	2.26	0.140854	0.420484	LOC_Os03g22790/LOC_Os07g35940/LOC_Os10g32810	3
GO:0002098	tRNA wobble uridine modification	3/1602	13/15655	2.26	0.140854	0.420484	LOC_Os01g41565/LOC_Os01g72980/Oryza_sativa_newGene_2535	3
GO:0006928	movement of cell or subcellular component	3/1602	13/15655	2.26	0.140854	0.420484	LOC_Os02g12200/LOC_Os09g35620/LOC_Os11g29350	3
GO:0007568	aging	3/1602	13/15655	2.26	0.140854	0.420484	LOC_Os05g05600/LOC_Os07g49114/LOC_Os09g35620	3
GO:0009690	cytokinin metabolic process	3/1602	13/15655	2.26	0.140854	0.420484	LOC_Os01g10110/LOC_Os08g04130/LOC_Os08g35860	3
GO:0009798	axis specification	3/1602	13/15655	2.26	0.140854	0.420484	LOC_Os09g35620/LOC_Os11g04600/LOC_Os12g04410	3
GO:0018230	peptidyl-L-cysteine S-palmitoylation	3/1602	13/15655	2.26	0.140854	0.420484	LOC_Os03g11110/LOC_Os05g38360/Oryza_sativa_newGene_3737	3
GO:0006366	transcription from RNA polymerase II promoter	3/1602	14/15655	2.09	0.166346	0.424026	LOC_Os03g62870/LOC_Os05g05860/LOC_Os10g29660	3
GO:0009867	jasmonic acid mediated signaling pathway	3/1602	14/15655	2.09	0.166346	0.424026	LOC_Os08g04130/LOC_Os11g04600/LOC_Os12g04410	3
GO:0010215	cellulose microfibril organization	3/1602	14/15655	2.09	0.166346	0.424026	LOC_Os03g18910/LOC_Os06g11990/LOC_Os07g41310	3
GO:0043622	cortical microtubule organization	3/1602	14/15655	2.09	0.166346	0.424026	LOC_Os02g57120/LOC_Os05g36960/LOC_Os06g11990	3
GO:0071241	cellular response to inorganic substance	3/1602	14/15655	2.09	0.166346	0.424026	LOC_Os02g43770/LOC_Os09g35620/LOC_Os09g39310	3
GO:0097237	cellular response to toxic substance	3/1602	14/15655	2.09	0.166346	0.424026	LOC_Os01g58194/LOC_Os02g53400/LOC_Os12g41590	3
GO:1990748	cellular detoxification	3/1602	14/15655	2.09	0.166346	0.424026	LOC_Os01g58194/LOC_Os02g53400/LOC_Os12g41590	3
GO:0006270	DNA replication initiation	3/1602	15/15655	1.95	0.193047	0.424026	LOC_Os06g11500/LOC_Os11g08660/LOC_Os11g29380	3
GO:0006612	protein targeting to membrane	3/1602	15/15655	1.95	0.193047	0.424026	LOC_Os03g11110/LOC_Os05g38360/Oryza_sativa_newGene_3737	3
GO:0007140	male meiotic nuclear division	3/1602	15/15655	1.95	0.193047	0.424026	LOC_Os03g23050/LOC_Os03g58600/LOC_Os04g30790	3
GO:0009743	response to carbohydrate	3/1602	15/15655	1.95	0.193047	0.424026	LOC_Os03g59610/LOC_Os09g39310/LOC_Os11g05470	3
GO:0009773	photosynthetic electron transport in photosystem I	3/1602	15/15655	1.95	0.193047	0.424026	LOC_Os06g46436/LOC_Os07g22498/LOC_Os08g41460	3
GO:0009834	plant-type secondary cell wall biogenesis	3/1602	15/15655	1.95	0.193047	0.424026	LOC_Os03g08600/LOC_Os05g37530/LOC_Os12g10320	3
GO:0001932	regulation of protein phosphorylation	3/1602	16/15655	1.83	0.220706	0.477207	LOC_Os04g31340/LOC_Os09g25550/LOC_Os09g35620	3
GO:0002181	cytoplasmic translation	3/1602	16/15655	1.83	0.220706	0.477207	LOC_Os03g22340/LOC_Os11g04070/LOC_Os12g03880	3
GO:0017144	drug metabolic process	3/1602	16/15655	1.83	0.220706	0.477207	LOC_Os01g25360/LOC_Os01g37650/LOC_Os02g57400	3
GO:0048469	cell maturation	3/1602	16/15655	1.83	0.220706	0.477207	LOC_Os09g35620/LOC_Os10g10580/Oryza_sativa_newGene_3279	3
GO:0006302	double-strand break repair	3/1602	17/15655	1.72	0.249083	0.503188	LOC_Os01g67850/LOC_Os09g10850/LOC_Os12g42760	3
GO:0009767	photosynthetic electron transport chain	3/1602	17/15655	1.72	0.249083	0.503188	LOC_Os01g57945/LOC_Os04g16844/LOC_Os07g09800	3
GO:0031349	positive regulation of defense response	3/1602	17/15655	1.72	0.249083	0.503188	LOC_Os10g38930/LOC_Os11g04600/LOC_Os12g04410	3
GO:0048588	developmental cell growth	3/1602	17/15655	1.72	0.249083	0.503188	LOC_Os03g18200/LOC_Os06g46754/LOC_Os09g35620	3
GO:0060341	regulation of cellular localization	3/1602	17/15655	1.72	0.249083	0.503188	LOC_Os01g73280/LOC_Os09g35620/LOC_Os12g08670	3
GO:0006261	DNA-dependent DNA replication	3/1602	18/15655	1.63	0.277957	0.503282	LOC_Os01g07260/LOC_Os02g47605/LOC_Os08g36330	3
GO:0009965	leaf morphogenesis	3/1602	18/15655	1.63	0.277957	0.503282	LOC_Os03g53990/LOC_Os11g04600/LOC_Os12g04410	3
GO:0019725	cellular homeostasis	3/1602	18/15655	1.63	0.277957	0.503282	LOC_Os02g53400/LOC_Os06g21550/LOC_Os09g09930	3
GO:0042981	regulation of apoptotic process	3/1602	18/15655	1.63	0.277957	0.503282	LOC_Os03g03920/LOC_Os06g11990/LOC_Os09g35620	3
GO:0048582	positive regulation of post-embryonic development	3/1602	18/15655	1.63	0.277957	0.503282	LOC_Os06g30370/LOC_Os09g33850/LOC_Os09g35620	3
GO:1901699	cellular response to nitrogen compound	3/1602	18/15655	1.63	0.277957	0.503282	LOC_Os02g43770/LOC_Os04g48370/LOC_Os09g35620	3
GO:0010090	trichome morphogenesis	3/1602	19/15655	1.54	0.307117	0.549555	LOC_Os02g53530/LOC_Os03g11680/Oryza_sativa_newGene_1257	3
GO:0015914	phospholipid transport	3/1602	19/15655	1.54	0.307117	0.549555	LOC_Os03g20970/LOC_Os05g01030/LOC_Os10g03400	3
GO:0032880	regulation of protein localization	3/1602	19/15655	1.54	0.307117	0.549555	LOC_Os01g73280/LOC_Os04g47700/LOC_Os09g35620	3
GO:0042325	regulation of phosphorylation	3/1602	19/15655	1.54	0.307117	0.549555	LOC_Os04g31340/LOC_Os09g25550/LOC_Os09g35620	3
GO:0051302	regulation of cell division	3/1602	19/15655	1.54	0.307117	0.549555	LOC_Os02g57120/LOC_Os09g35620/LOC_Os09g39310	3
GO:0007030	Golgi organization	3/1602	20/15655	1.47	0.336376	0.567741	LOC_Os01g73280/LOC_Os03g63250/LOC_Os06g42824	3
GO:0009788	negative regulation of abscisic acid-activated signaling pathway	3/1602	20/15655	1.47	0.336376	0.567741	LOC_Os01g61080/LOC_Os02g53530/LOC_Os03g11680	3
GO:0016458	gene silencing	3/1602	20/15655	1.47	0.336376	0.567741	LOC_Os03g23050/LOC_Os04g48370/LOC_Os12g16290	3
GO:0009932	cell tip growth	3/1602	21/15655	1.4	0.36556	0.588115	LOC_Os03g18200/LOC_Os06g46754/Oryza_sativa_newGene_3279	3
GO:0071407	cellular response to organic cyclic compound	3/1602	21/15655	1.4	0.36556	0.588115	LOC_Os04g48370/LOC_Os05g50990/LOC_Os09g35620	3
GO:0006790	sulfur compound metabolic process	3/1602	22/15655	1.33	0.394518	0.610481	LOC_Os01g27360/LOC_Os03g57200/LOC_Os12g08280	3
GO:0007131	reciprocal meiotic recombination	3/1602	22/15655	1.33	0.394518	0.610481	LOC_Os09g10850/LOC_Os11g40150/LOC_Os12g42760	3
GO:0051129	negative regulation of cellular component organization	3/1602	22/15655	1.33	0.394518	0.610481	LOC_Os02g57120/LOC_Os11g29350/LOC_Os12g08670	3
GO:0006352	DNA-templated transcription, initiation	3/1602	24/15655	1.22	0.451228	0.650782	LOC_Os05g51150/LOC_Os09g26180/LOC_Os10g29660	3
GO:0044262	cellular carbohydrate metabolic process	3/1602	24/15655	1.22	0.451228	0.650782	LOC_Os03g13690/LOC_Os06g11990/Oryza_sativa_newGene_3279	3
GO:0045927	positive regulation of growth	3/1602	24/15655	1.22	0.451228	0.650782	LOC_Os01g62670/LOC_Os05g33670/Oryza_sativa_newGene_5309	3
GO:0051085	chaperone mediated protein folding requiring cofactor	3/1602	24/15655	1.22	0.451228	0.650782	LOC_Os01g62290/LOC_Os02g20394/LOC_Os11g47760	3
GO:0051240	positive regulation of multicellular organismal process	3/1602	24/15655	1.22	0.451228	0.650782	LOC_Os06g30370/LOC_Os09g33850/LOC_Os09g35620	3
GO:1901419	regulation of response to alcohol	3/1602	24/15655	1.22	0.451228	0.650782	LOC_Os02g53530/LOC_Os03g11680/LOC_Os05g50990	3
GO:1905957	regulation of cellular response to alcohol	3/1602	24/15655	1.22	0.451228	0.650782	LOC_Os02g53530/LOC_Os03g11680/LOC_Os05g50990	3
GO:0009742	brassinosteroid mediated signaling pathway	3/1602	25/15655	1.17	0.478761	0.651968	LOC_Os04g38480/LOC_Os05g50990/LOC_Os08g07760	3
GO:0010941	regulation of cell death	3/1602	25/15655	1.17	0.478761	0.651968	LOC_Os03g03920/LOC_Os06g11990/LOC_Os09g35620	3
GO:0021700	developmental maturation	3/1602	25/15655	1.17	0.478761	0.651968	LOC_Os09g35620/LOC_Os10g10580/Oryza_sativa_newGene_3279	3
GO:0090626	plant epidermis morphogenesis	3/1602	25/15655	1.17	0.478761	0.651968	LOC_Os02g53530/LOC_Os03g11680/Oryza_sativa_newGene_3279	3
GO:0009787	regulation of abscisic acid-activated signaling pathway	3/1602	26/15655	1.13	0.505627	0.680573	LOC_Os02g53530/LOC_Os03g11680/LOC_Os05g50990	3
GO:0019439	aromatic compound catabolic process	3/1602	26/15655	1.13	0.505627	0.680573	LOC_Os01g73280/LOC_Os03g57200/LOC_Os09g39440	3
GO:0031146	SCF-dependent proteasomal ubiquitin-dependent protein catabolic process	3/1602	26/15655	1.13	0.505627	0.680573	LOC_Os02g55540/LOC_Os07g43240/LOC_Os09g10054	3
GO:0046677	response to antibiotic	3/1602	26/15655	1.13	0.505627	0.680573	LOC_Os02g11720/LOC_Os03g60220/LOC_Os07g49114	3
GO:0051052	regulation of DNA metabolic process	3/1602	26/15655	1.13	0.505627	0.680573	LOC_Os01g67850/LOC_Os01g73280/LOC_Os09g35620	3
GO:1901361	organic cyclic compound catabolic process	3/1602	26/15655	1.13	0.505627	0.680573	LOC_Os01g73280/LOC_Os03g57200/LOC_Os09g39440	3
GO:0007034	vacuolar transport	3/1602	27/15655	1.09	0.531754	0.686928	LOC_Os07g47400/LOC_Os10g10580/LOC_Os11g05470	3
GO:0051093	negative regulation of developmental process	3/1602	27/15655	1.09	0.531754	0.686928	LOC_Os06g16300/LOC_Os09g35620/LOC_Os11g05470	3
GO:0080135	regulation of cellular response to stress	3/1602	27/15655	1.09	0.531754	0.686928	LOC_Os01g67850/LOC_Os03g03920/LOC_Os09g35620	3
GO:0006631	fatty acid metabolic process	3/1602	28/15655	1.05	0.557084	0.716614	LOC_Os01g65830/LOC_Os02g21520/LOC_Os08g10010	3
GO:0008033	tRNA processing	3/1602	29/15655	1.01	0.581572	0.720377	LOC_Os04g22870/LOC_Os06g45250/LOC_Os10g25300	3
GO:0031668	cellular response to extracellular stimulus	3/1602	29/15655	1.01	0.581572	0.720377	LOC_Os01g01650/LOC_Os03g57200/LOC_Os03g58040	3
GO:0043067	regulation of programmed cell death	3/1602	29/15655	1.01	0.581572	0.720377	LOC_Os03g03920/LOC_Os06g11990/LOC_Os09g35620	3
GO:0045229	external encapsulating structure organization	3/1602	29/15655	1.01	0.581572	0.720377	LOC_Os01g42090/LOC_Os06g11990/Oryza_sativa_newGene_3279	3
GO:0051094	positive regulation of developmental process	3/1602	29/15655	1.01	0.581572	0.720377	LOC_Os06g30370/LOC_Os09g33850/LOC_Os09g35620	3
GO:0071214	cellular response to abiotic stimulus	3/1602	29/15655	1.01	0.581572	0.720377	LOC_Os03g57200/LOC_Os03g62790/LOC_Os09g35620	3
GO:0048507	meristem development	3/1602	30/15655	0.98	0.605182	0.74358	LOC_Os03g53990/LOC_Os11g04600/LOC_Os12g04410	3
GO:0009991	response to extracellular stimulus	3/1602	31/15655	0.95	0.627889	0.75475	LOC_Os01g01650/LOC_Os03g57200/LOC_Os03g58040	3
GO:0043085	positive regulation of catalytic activity	3/1602	31/15655	0.95	0.627889	0.75475	LOC_Os02g56570/LOC_Os04g47700/LOC_Os09g35620	3
GO:0010026	trichome differentiation	3/1602	32/15655	0.92	0.649678	0.772093	LOC_Os02g53530/LOC_Os03g11680/Oryza_sativa_newGene_3279	3
GO:0006004	fucose metabolic process	3/1602	33/15655	0.89	0.670542	0.78287	LOC_Os06g11600/LOC_Os09g29940/LOC_Os09g37590	3
GO:0044093	positive regulation of molecular function	3/1602	34/15655	0.86	0.690478	0.799344	LOC_Os02g56570/LOC_Os04g47700/LOC_Os09g35620	3
GO:0051321	meiotic cell cycle	3/1602	35/15655	0.84	0.709491	0.811638	LOC_Os03g23050/LOC_Os04g42330/LOC_Os10g03400	3
GO:0006811	ion transport	3/1602	37/15655	0.79	0.744797	0.839428	LOC_Os02g43770/LOC_Os09g09930/LOC_Os10g03400	3
GO:0006914	autophagy	3/1602	38/15655	0.77	0.761123	0.845327	LOC_Os03g03920/LOC_Os04g53240/LOC_Os06g42824	3
GO:0034654	nucleobase-containing compound biosynthetic process	3/1602	38/15655	0.77	0.761123	0.845327	LOC_Os01g73280/LOC_Os05g28040/LOC_Os11g39710	3
GO:0010243	response to organonitrogen compound	3/1602	40/15655	0.73	0.791225	0.86304	LOC_Os01g73280/LOC_Os03g03920/LOC_Os09g35620	3
GO:0048285	organelle fission	3/1602	40/15655	0.73	0.791225	0.86304	LOC_Os03g23050/LOC_Os04g33770/LOC_Os10g10580	3
GO:0006970	response to osmotic stress	3/1602	43/15655	0.68	0.830398	0.889068	LOC_Os02g51710/LOC_Os03g58040/LOC_Os05g50990	3
GO:0006518	peptide metabolic process	3/1602	46/15655	0.64	0.863083	0.915224	LOC_Os01g27360/LOC_Os03g57200/LOC_Os07g07760	3
GO:0043603	cellular amide metabolic process	3/1602	46/15655	0.64	0.863083	0.915224	LOC_Os01g27360/LOC_Os03g57200/LOC_Os07g07760	3
GO:0045935	positive regulation of nucleobase-containing compound metabolic process	3/1602	47/15655	0.62	0.872677	0.920993	LOC_Os01g67850/LOC_Os04g51130/LOC_Os09g35620	3
GO:0065003	macromolecular complex assembly	3/1602	49/15655	0.6	0.890095	0.931824	LOC_Os01g42090/LOC_Os02g57120/LOC_Os09g35620	3
GO:0016071	mRNA metabolic process	3/1602	54/15655	0.54	0.92465	0.95761	LOC_Os02g42210/LOC_Os04g28310/LOC_Os05g28040	3
GO:0000398	mRNA splicing, via spliceosome	3/1602	58/15655	0.51	0.944785	0.970223	LOC_Os01g47750/LOC_Os04g31950/LOC_Os12g15420	3
GO:0006397	mRNA processing	3/1602	68/15655	0.43	0.975347	0.991633	LOC_Os04g28310/LOC_Os05g49470/LOC_Os06g48520	3
GO:0045892	negative regulation of transcription, DNA-templated	3/1602	76/15655	0.39	0.987383	0.995083	LOC_Os01g67850/LOC_Os02g31160/LOC_Os09g35620	3
GO:0009156	ribonucleoside monophosphate biosynthetic process	2/1602	2/15655	9.77	0.0104659	0.33101	LOC_Os02g03540/LOC_Os06g41360	2
GO:0010446	response to alkaline pH	2/1602	2/15655	9.77	0.0104659	0.33101	LOC_Os02g43470/LOC_Os04g45970	2
GO:0030336	negative regulation of cell migration	2/1602	2/15655	9.77	0.0104659	0.33101	LOC_Os09g35620/LOC_Os12g08670	2
GO:0040013	negative regulation of locomotion	2/1602	2/15655	9.77	0.0104659	0.33101	LOC_Os09g35620/LOC_Os12g08670	2
GO:0051271	negative regulation of cellular component movement	2/1602	2/15655	9.77	0.0104659	0.33101	LOC_Os09g35620/LOC_Os12g08670	2
GO:0080148	negative regulation of response to water deprivation	2/1602	2/15655	9.77	0.0104659	0.33101	LOC_Os03g24040/LOC_Os08g04130	2
GO:0085029	extracellular matrix assembly	2/1602	2/15655	9.77	0.0104659	0.33101	LOC_Os01g42090/LOC_Os06g11990	2
GO:1902883	negative regulation of response to oxidative stress	2/1602	2/15655	9.77	0.0104659	0.33101	LOC_Os09g35620/LOC_Os12g08670	2
GO:2000146	negative regulation of cell motility	2/1602	2/15655	9.77	0.0104659	0.33101	LOC_Os09g35620/LOC_Os12g08670	2
GO:0002366	leukocyte activation involved in immune response	2/1602	3/15655	6.51	0.029258	0.33101	LOC_Os01g67850/LOC_Os09g35620	2
GO:0002443	leukocyte mediated immunity	2/1602	3/15655	6.51	0.029258	0.33101	LOC_Os01g67850/LOC_Os09g35620	2
GO:0006809	nitric oxide biosynthetic process	2/1602	3/15655	6.51	0.029258	0.33101	LOC_Os08g36480/LOC_Os08g36500	2
GO:0007611	learning or memory	2/1602	3/15655	6.51	0.029258	0.33101	LOC_Os09g35620/LOC_Os12g16290	2
GO:0009616	virus induced gene silencing	2/1602	3/15655	6.51	0.029258	0.33101	LOC_Os03g06440/LOC_Os03g23050	2
GO:0010022	meristem determinacy	2/1602	3/15655	6.51	0.029258	0.33101	LOC_Os11g04600/LOC_Os12g04410	2
GO:0010115	regulation of abscisic acid biosynthetic process	2/1602	3/15655	6.51	0.029258	0.33101	LOC_Os03g59610/LOC_Os10g18340	2
GO:0010208	pollen wall assembly	2/1602	3/15655	6.51	0.029258	0.33101	LOC_Os01g42090/LOC_Os06g11990	2
GO:0010254	nectary development	2/1602	3/15655	6.51	0.029258	0.33101	LOC_Os11g04600/LOC_Os12g04410	2
GO:0010432	bract development	2/1602	3/15655	6.51	0.029258	0.33101	LOC_Os11g04600/LOC_Os12g04410	2
GO:0010433	bract morphogenesis	2/1602	3/15655	6.51	0.029258	0.33101	LOC_Os11g04600/LOC_Os12g04410	2
GO:0010434	bract formation	2/1602	3/15655	6.51	0.029258	0.33101	LOC_Os11g04600/LOC_Os12g04410	2
GO:0016477	cell migration	2/1602	3/15655	6.51	0.029258	0.33101	LOC_Os09g35620/LOC_Os10g22570	2
GO:0031167	rRNA methylation	2/1602	3/15655	6.51	0.029258	0.33101	LOC_Os05g08360/LOC_Os10g25300	2
GO:0043062	extracellular structure organization	2/1602	3/15655	6.51	0.029258	0.33101	LOC_Os01g42090/LOC_Os06g11990	2
GO:0050890	cognition	2/1602	3/15655	6.51	0.029258	0.33101	LOC_Os09g35620/LOC_Os12g16290	2
GO:0051924	regulation of calcium ion transport	2/1602	3/15655	6.51	0.029258	0.33101	LOC_Os03g03920/LOC_Os09g35620	2
GO:0001817	regulation of cytokine production	2/1602	4/15655	4.89	0.0545648	0.33101	LOC_Os01g73280/LOC_Os09g35620	2
GO:0002263	cell activation involved in immune response	2/1602	4/15655	4.89	0.0545648	0.33101	LOC_Os01g67850/LOC_Os09g35620	2
GO:0006587	serotonin biosynthetic process from tryptophan	2/1602	4/15655	4.89	0.0545648	0.33101	LOC_Os08g04540/LOC_Os12g16720	2
GO:0006750	glutathione biosynthetic process	2/1602	4/15655	4.89	0.0545648	0.33101	LOC_Os05g03800/LOC_Os05g03820	2
GO:0007610	behavior	2/1602	4/15655	4.89	0.0545648	0.33101	LOC_Os09g35620/LOC_Os12g16290	2
GO:0009750	response to fructose	2/1602	4/15655	4.89	0.0545648	0.33101	LOC_Os03g59610/LOC_Os09g39310	2
GO:0009838	abscission	2/1602	4/15655	4.89	0.0545648	0.33101	LOC_Os11g04600/LOC_Os12g04410	2
GO:0018401	peptidyl-proline hydroxylation to 4-hydroxy-L-proline	2/1602	4/15655	4.89	0.0545648	0.33101	LOC_Os03g58890/LOC_Os05g41010	2
GO:0030198	extracellular matrix organization	2/1602	4/15655	4.89	0.0545648	0.33101	LOC_Os01g42090/LOC_Os06g11990	2
GO:0030334	regulation of cell migration	2/1602	4/15655	4.89	0.0545648	0.33101	LOC_Os09g35620/LOC_Os12g08670	2
GO:0032479	regulation of type I interferon production	2/1602	4/15655	4.89	0.0545648	0.33101	LOC_Os01g73280/LOC_Os09g35620	2
GO:0045321	leukocyte activation	2/1602	4/15655	4.89	0.0545648	0.33101	LOC_Os01g67850/LOC_Os09g35620	2
GO:0045491	xylan metabolic process	2/1602	4/15655	4.89	0.0545648	0.33101	LOC_Os05g37530/LOC_Os12g10320	2
GO:0046165	alcohol biosynthetic process	2/1602	4/15655	4.89	0.0545648	0.33101	LOC_Os02g57400/LOC_Os03g59610	2
GO:0046474	glycerophospholipid biosynthetic process	2/1602	4/15655	4.89	0.0545648	0.33101	LOC_Os01g08760/LOC_Os03g17590	2
GO:0046649	lymphocyte activation	2/1602	4/15655	4.89	0.0545648	0.33101	LOC_Os01g67850/LOC_Os09g35620	2
GO:0048439	flower morphogenesis	2/1602	4/15655	4.89	0.0545648	0.33101	LOC_Os11g04600/LOC_Os12g04410	2
GO:0050918	positive chemotaxis	2/1602	4/15655	4.89	0.0545648	0.33101	LOC_Os04g34670/LOC_Os06g20440	2
GO:0051513	regulation of monopolar cell growth	2/1602	4/15655	4.89	0.0545648	0.33101	LOC_Os03g30530/LOC_Os07g41200	2
GO:1902850	microtubule cytoskeleton organization involved in mitosis	2/1602	4/15655	4.89	0.0545648	0.33101	LOC_Os01g73280/LOC_Os09g35620	2
GO:1903201	regulation of oxidative stress-induced cell death	2/1602	4/15655	4.89	0.0545648	0.33101	LOC_Os03g03920/LOC_Os09g35620	2
GO:0000725	recombinational repair	2/1602	5/15655	3.91	0.0848577	0.33101	LOC_Os01g40980/LOC_Os07g15500	2
GO:0001775	cell activation	2/1602	5/15655	3.91	0.0848577	0.33101	LOC_Os01g67850/LOC_Os09g35620	2
GO:0002520	immune system development	2/1602	5/15655	3.91	0.0848577	0.33101	LOC_Os01g67850/LOC_Os09g35620	2
GO:0006066	alcohol metabolic process	2/1602	5/15655	3.91	0.0848577	0.33101	LOC_Os02g57400/LOC_Os03g59610	2
GO:0006308	DNA catabolic process	2/1602	5/15655	3.91	0.0848577	0.33101	LOC_Os01g03730/LOC_Os04g55850	2
GO:0006935	chemotaxis	2/1602	5/15655	3.91	0.0848577	0.33101	LOC_Os04g34670/LOC_Os06g20440	2
GO:0009682	induced systemic resistance	2/1602	5/15655	3.91	0.0848577	0.33101	LOC_Os11g04600/LOC_Os12g04410	2
GO:0009696	salicylic acid metabolic process	2/1602	5/15655	3.91	0.0848577	0.33101	LOC_Os01g25360/LOC_Os01g37650	2
GO:0009746	response to hexose	2/1602	5/15655	3.91	0.0848577	0.33101	LOC_Os03g59610/LOC_Os09g39310	2
GO:0009969	xyloglucan biosynthetic process	2/1602	5/15655	3.91	0.0848577	0.33101	LOC_Os02g17534/LOC_Os08g24750	2
GO:0010089	xylem development	2/1602	5/15655	3.91	0.0848577	0.33101	LOC_Os04g51130/LOC_Os07g34020	2
GO:0015693	magnesium ion transport	2/1602	5/15655	3.91	0.0848577	0.33101	LOC_Os05g35060/LOC_Os06g50180	2
GO:0016246	RNA interference	2/1602	5/15655	3.91	0.0848577	0.33101	LOC_Os04g48370/LOC_Os12g16290	2
GO:0030522	intracellular receptor signaling pathway	2/1602	5/15655	3.91	0.0848577	0.33101	LOC_Os03g62790/LOC_Os09g35620	2
GO:0034227	tRNA thio-modification	2/1602	5/15655	3.91	0.0848577	0.33101	LOC_Os01g41565/Oryza_sativa_newGene_2535	2
GO:0034284	response to monosaccharide	2/1602	5/15655	3.91	0.0848577	0.33101	LOC_Os03g59610/LOC_Os09g39310	2
GO:0040012	regulation of locomotion	2/1602	5/15655	3.91	0.0848577	0.33101	LOC_Os09g35620/LOC_Os12g08670	2
GO:0042128	nitrate assimilation	2/1602	5/15655	3.91	0.0848577	0.33101	LOC_Os08g36480/LOC_Os08g36500	2
GO:0042330	taxis	2/1602	5/15655	3.91	0.0848577	0.33101	LOC_Os04g34670/LOC_Os06g20440	2
GO:0051046	regulation of secretion	2/1602	5/15655	3.91	0.0848577	0.33101	LOC_Os04g47700/LOC_Os12g08670	2
GO:0051607	defense response to virus	2/1602	5/15655	3.91	0.0848577	0.33101	LOC_Os03g23050/LOC_Os06g16300	2
GO:1900180	regulation of protein localization to nucleus	2/1602	5/15655	3.91	0.0848577	0.33101	LOC_Os01g73280/LOC_Os09g35620	2
GO:1900182	positive regulation of protein localization to nucleus	2/1602	5/15655	3.91	0.0848577	0.33101	LOC_Os01g73280/LOC_Os09g35620	2
GO:1903530	regulation of secretion by cell	2/1602	5/15655	3.91	0.0848577	0.33101	LOC_Os04g47700/LOC_Os12g08670	2
GO:2000145	regulation of cell motility	2/1602	5/15655	3.91	0.0848577	0.33101	LOC_Os09g35620/LOC_Os12g08670	2
GO:0000266	mitochondrial fission	2/1602	6/15655	3.26	0.118852	0.363707	LOC_Os04g33770/LOC_Os10g10580	2
GO:0006168	adenine salvage	2/1602	6/15655	3.26	0.118852	0.363707	LOC_Os02g40010/LOC_Os12g39860	2
GO:0006438	valyl-tRNA aminoacylation	2/1602	6/15655	3.26	0.118852	0.363707	LOC_Os03g02100/LOC_Os10g36210	2
GO:0006568	tryptophan metabolic process	2/1602	6/15655	3.26	0.118852	0.363707	LOC_Os02g16630/LOC_Os08g23150	2
GO:0006865	amino acid transport	2/1602	6/15655	3.26	0.118852	0.363707	LOC_Os01g42234/LOC_Os04g35540	2
GO:0009686	gibberellin biosynthetic process	2/1602	6/15655	3.26	0.118852	0.363707	LOC_Os09g15050/LOC_Os09g39310	2
GO:0009756	carbohydrate mediated signaling	2/1602	6/15655	3.26	0.118852	0.363707	LOC_Os03g59610/LOC_Os09g39310	2
GO:0010101	post-embryonic root morphogenesis	2/1602	6/15655	3.26	0.118852	0.363707	LOC_Os07g05470/Oryza_sativa_newGene_3643	2
GO:0010102	lateral root morphogenesis	2/1602	6/15655	3.26	0.118852	0.363707	LOC_Os07g05470/Oryza_sativa_newGene_3643	2
GO:0010112	regulation of systemic acquired resistance	2/1602	6/15655	3.26	0.118852	0.363707	LOC_Os01g32460/LOC_Os10g38930	2
GO:0010216	maintenance of DNA methylation	2/1602	6/15655	3.26	0.118852	0.363707	LOC_Os01g70220/LOC_Os03g38740	2
GO:0010227	floral organ abscission	2/1602	6/15655	3.26	0.118852	0.363707	LOC_Os11g04600/LOC_Os12g04410	2
GO:0010476	gibberellin mediated signaling pathway	2/1602	6/15655	3.26	0.118852	0.363707	LOC_Os02g53530/LOC_Os03g11680	2
GO:0010959	regulation of metal ion transport	2/1602	6/15655	3.26	0.118852	0.363707	LOC_Os03g03920/LOC_Os09g35620	2
GO:0016999	antibiotic metabolic process	2/1602	6/15655	3.26	0.118852	0.363707	LOC_Os01g25360/LOC_Os01g37650	2
GO:0018958	phenol-containing compound metabolic process	2/1602	6/15655	3.26	0.118852	0.363707	LOC_Os01g25360/LOC_Os01g37650	2
GO:0051270	regulation of cellular component movement	2/1602	6/15655	3.26	0.118852	0.363707	LOC_Os09g35620/LOC_Os12g08670	2
GO:0051560	mitochondrial calcium ion homeostasis	2/1602	6/15655	3.26	0.118852	0.363707	LOC_Os03g13050/LOC_Os06g09260	2
GO:0051701	interaction with host	2/1602	6/15655	3.26	0.118852	0.363707	LOC_Os03g23050/LOC_Os09g35620	2
GO:0071370	cellular response to gibberellin stimulus	2/1602	6/15655	3.26	0.118852	0.363707	LOC_Os02g53530/LOC_Os03g11680	2
GO:0098586	cellular response to virus	2/1602	6/15655	3.26	0.118852	0.363707	LOC_Os01g73280/LOC_Os03g23050	2
GO:1900407	regulation of cellular response to oxidative stress	2/1602	6/15655	3.26	0.118852	0.363707	LOC_Os03g03920/LOC_Os09g35620	2
GO:2001233	regulation of apoptotic signaling pathway	2/1602	6/15655	3.26	0.118852	0.363707	LOC_Os03g03920/LOC_Os09g35620	2
GO:0002218	activation of innate immune response	2/1602	7/15655	2.79	0.155475	0.424026	LOC_Os11g04600/LOC_Os12g04410	2
GO:0003008	system process	2/1602	7/15655	2.79	0.155475	0.424026	LOC_Os09g35620/LOC_Os12g16290	2
GO:0009685	gibberellin metabolic process	2/1602	7/15655	2.79	0.155475	0.424026	LOC_Os01g55240/LOC_Os09g39310	2
GO:0009955	adaxial/abaxial pattern specification	2/1602	7/15655	2.79	0.155475	0.424026	LOC_Os11g04600/LOC_Os12g04410	2
GO:0010182	sugar mediated signaling pathway	2/1602	7/15655	2.79	0.155475	0.424026	LOC_Os03g59610/LOC_Os09g39310	2
GO:0030100	regulation of endocytosis	2/1602	7/15655	2.79	0.155475	0.424026	LOC_Os11g29350/LOC_Os12g08670	2
GO:0031023	microtubule organizing center organization	2/1602	7/15655	2.79	0.155475	0.424026	LOC_Os02g57120/LOC_Os09g35620	2
GO:0042023	DNA endoreduplication	2/1602	7/15655	2.79	0.155475	0.424026	LOC_Os02g05365/LOC_Os06g51380	2
GO:0043269	regulation of ion transport	2/1602	7/15655	2.79	0.155475	0.424026	LOC_Os03g03920/LOC_Os09g35620	2
GO:0045017	glycerolipid biosynthetic process	2/1602	7/15655	2.79	0.155475	0.424026	LOC_Os01g08760/LOC_Os01g48874	2
GO:0048870	cell motility	2/1602	7/15655	2.79	0.155475	0.424026	LOC_Os09g35620/LOC_Os11g29350	2
GO:0050877	nervous system process	2/1602	7/15655	2.79	0.155475	0.424026	LOC_Os09g35620/LOC_Os12g16290	2
GO:0051051	negative regulation of transport	2/1602	7/15655	2.79	0.155475	0.424026	LOC_Os03g03920/LOC_Os12g08670	2
GO:0051091	positive regulation of sequence-specific DNA binding transcription factor activity	2/1602	7/15655	2.79	0.155475	0.424026	LOC_Os05g32460/LOC_Os09g35620	2
GO:0051674	localization of cell	2/1602	7/15655	2.79	0.155475	0.424026	LOC_Os09g35620/LOC_Os11g29350	2
GO:0071322	cellular response to carbohydrate stimulus	2/1602	7/15655	2.79	0.155475	0.424026	LOC_Os03g59610/LOC_Os09g39310	2
GO:0120009	intermembrane lipid transfer	2/1602	7/15655	2.79	0.155475	0.424026	LOC_Os03g50280/LOC_Os10g03400	2
GO:1900865	chloroplast RNA modification	2/1602	7/15655	2.79	0.155475	0.424026	LOC_Os03g53170/LOC_Os08g04450	2
GO:2000030	regulation of response to red or far red light	2/1602	7/15655	2.79	0.155475	0.424026	LOC_Os03g57200/LOC_Os07g07820	2
GO:2000243	positive regulation of reproductive process	2/1602	7/15655	2.79	0.155475	0.424026	LOC_Os09g33850/LOC_Os09g35620	2
GO:0002237	response to molecule of bacterial origin	2/1602	8/15655	2.44	0.193833	0.424026	LOC_Os02g31160/LOC_Os09g31390	2
GO:0002253	activation of immune response	2/1602	8/15655	2.44	0.193833	0.424026	LOC_Os11g04600/LOC_Os12g04410	2
GO:0005982	starch metabolic process	2/1602	8/15655	2.44	0.193833	0.424026	LOC_Os08g37380/LOC_Os11g37560	2
GO:0006656	phosphatidylcholine biosynthetic process	2/1602	8/15655	2.44	0.193833	0.424026	LOC_Os01g08760/LOC_Os01g50030	2
GO:0007163	establishment or maintenance of cell polarity	2/1602	8/15655	2.44	0.193833	0.424026	LOC_Os09g35620/LOC_Os10g22570	2
GO:0009626	plant-type hypersensitive response	2/1602	8/15655	2.44	0.193833	0.424026	LOC_Os01g54510/LOC_Os07g47590	2
GO:0009817	defense response to fungus, incompatible interaction	2/1602	8/15655	2.44	0.193833	0.424026	LOC_Os01g25360/LOC_Os01g37650	2
GO:0009911	positive regulation of flower development	2/1602	8/15655	2.44	0.193833	0.424026	LOC_Os08g37380/LOC_Os09g33850	2
GO:0016075	rRNA catabolic process	2/1602	8/15655	2.44	0.193833	0.424026	LOC_Os01g73280/LOC_Os08g02360	2
GO:0032434	regulation of proteasomal ubiquitin-dependent protein catabolic process	2/1602	8/15655	2.44	0.193833	0.424026	LOC_Os03g03420/LOC_Os03g03920	2
GO:0032784	regulation of DNA-templated transcription, elongation	2/1602	8/15655	2.44	0.193833	0.424026	LOC_Os01g67850/LOC_Os02g53230	2
GO:0033169	histone H3-K9 demethylation	2/1602	8/15655	2.44	0.193833	0.424026	LOC_Os03g23050/LOC_Os03g58600	2
GO:0034605	cellular response to heat	2/1602	8/15655	2.44	0.193833	0.424026	LOC_Os03g18200/LOC_Os05g44340	2
GO:0051054	positive regulation of DNA metabolic process	2/1602	8/15655	2.44	0.193833	0.424026	LOC_Os01g67850/LOC_Os09g35620	2
GO:0051568	histone H3-K4 methylation	2/1602	8/15655	2.44	0.193833	0.424026	LOC_Os11g04890/LOC_Os11g04930	2
GO:0051972	regulation of telomerase activity	2/1602	8/15655	2.44	0.193833	0.424026	LOC_Os01g73280/LOC_Os09g35620	2
GO:0065001	specification of axis polarity	2/1602	8/15655	2.44	0.193833	0.424026	LOC_Os11g04600/LOC_Os12g04410	2
GO:1903320	regulation of protein modification by small protein conjugation or removal	2/1602	8/15655	2.44	0.193833	0.424026	LOC_Os03g03920/LOC_Os09g35620	2
GO:2000278	regulation of DNA biosynthetic process	2/1602	8/15655	2.44	0.193833	0.424026	LOC_Os01g73280/LOC_Os09g35620	2
GO:0000122	negative regulation of transcription from RNA polymerase II promoter	2/1602	9/15655	2.17	0.233188	0.494551	LOC_Os01g67850/LOC_Os09g35620	2
GO:0005987	sucrose catabolic process	2/1602	9/15655	2.17	0.233188	0.494551	LOC_Os01g22900/LOC_Os02g03320	2
GO:0006597	spermine biosynthetic process	2/1602	9/15655	2.17	0.233188	0.494551	LOC_Os04g42090/LOC_Os09g25620	2
GO:0007292	female gamete generation	2/1602	9/15655	2.17	0.233188	0.494551	LOC_Os03g23050/LOC_Os09g35620	2
GO:0009740	gibberellic acid mediated signaling pathway	2/1602	9/15655	2.17	0.233188	0.494551	LOC_Os02g53530/LOC_Os03g11680	2
GO:0009792	embryo development ending in birth or egg hatching	2/1602	9/15655	2.17	0.233188	0.494551	LOC_Os01g73280/LOC_Os09g35620	2
GO:0009944	polarity specification of adaxial/abaxial axis	2/1602	9/15655	2.17	0.233188	0.494551	LOC_Os11g04600/LOC_Os12g04410	2
GO:0010091	trichome branching	2/1602	9/15655	2.17	0.233188	0.494551	LOC_Os02g53530/LOC_Os03g11680	2
GO:0010099	regulation of photomorphogenesis	2/1602	9/15655	2.17	0.233188	0.494551	LOC_Os01g49310/LOC_Os07g07820	2
GO:0045859	regulation of protein kinase activity	2/1602	9/15655	2.17	0.233188	0.494551	LOC_Os04g31340/LOC_Os09g25550	2
GO:0046685	response to arsenic-containing substance	2/1602	9/15655	2.17	0.233188	0.494551	LOC_Os03g16020/LOC_Os04g17660	2
GO:0050777	negative regulation of immune response	2/1602	9/15655	2.17	0.233188	0.494551	LOC_Os02g31160/LOC_Os06g11990	2
GO:0060918	auxin transport	2/1602	9/15655	2.17	0.233188	0.494551	LOC_Os03g53990/LOC_Os09g25330	2
GO:0071248	cellular response to metal ion	2/1602	9/15655	2.17	0.233188	0.494551	LOC_Os09g35620/LOC_Os09g39310	2
GO:0071368	cellular response to cytokinin stimulus	2/1602	9/15655	2.17	0.233188	0.494551	LOC_Os02g53530/LOC_Os03g11680	2
GO:0072593	reactive oxygen species metabolic process	2/1602	9/15655	2.17	0.233188	0.494551	LOC_Os02g07760/LOC_Os05g05600	2
GO:1990778	protein localization to cell periphery	2/1602	9/15655	2.17	0.233188	0.494551	LOC_Os06g11990/LOC_Os09g35620	2
GO:0000245	spliceosomal complex assembly	2/1602	10/15655	1.95	0.272935	0.503188	LOC_Os02g04950/LOC_Os02g05410	2
GO:0005978	glycogen biosynthetic process	2/1602	10/15655	1.95	0.272935	0.503188	LOC_Os02g32660/LOC_Os05g50380	2
GO:0006012	galactose metabolic process	2/1602	10/15655	1.95	0.272935	0.503188	LOC_Os04g52730/LOC_Os08g03570	2
GO:0006301	postreplication repair	2/1602	10/15655	1.95	0.272935	0.503188	LOC_Os01g07260/LOC_Os01g73280	2
GO:0006575	cellular modified amino acid metabolic process	2/1602	10/15655	1.95	0.272935	0.503188	LOC_Os01g27360/LOC_Os03g57200	2
GO:0006720	isoprenoid metabolic process	2/1602	10/15655	1.95	0.272935	0.503188	LOC_Os03g59610/LOC_Os09g39310	2
GO:0006721	terpenoid metabolic process	2/1602	10/15655	1.95	0.272935	0.503188	LOC_Os03g59610/LOC_Os09g39310	2
GO:0009267	cellular response to starvation	2/1602	10/15655	1.95	0.272935	0.503188	LOC_Os01g01650/LOC_Os03g58040	2
GO:0030422	production of siRNA involved in RNA interference	2/1602	10/15655	1.95	0.272935	0.503188	LOC_Os03g63740/LOC_Os04g48370	2
GO:0034620	cellular response to unfolded protein	2/1602	10/15655	1.95	0.272935	0.503188	LOC_Os01g62290/LOC_Os11g47760	2
GO:0034765	regulation of ion transmembrane transport	2/1602	10/15655	1.95	0.272935	0.503188	LOC_Os01g45990/LOC_Os03g03920	2
GO:0042823	pyridoxal phosphate biosynthetic process	2/1602	10/15655	1.95	0.272935	0.503188	LOC_Os01g39280/LOC_Os07g01020	2
GO:0044403	symbiosis, encompassing mutualism through parasitism	2/1602	10/15655	1.95	0.272935	0.503188	LOC_Os03g23050/LOC_Os09g35620	2
GO:0044419	interspecies interaction between organisms	2/1602	10/15655	1.95	0.272935	0.503188	LOC_Os03g23050/LOC_Os09g35620	2
GO:0048466	androecium development	2/1602	10/15655	1.95	0.272935	0.503188	LOC_Os05g32070/LOC_Os06g11990	2
GO:0051494	negative regulation of cytoskeleton organization	2/1602	10/15655	1.95	0.272935	0.503188	LOC_Os02g57120/LOC_Os11g29350	2
GO:0090693	plant organ senescence	2/1602	10/15655	1.95	0.272935	0.503188	LOC_Os05g05600/LOC_Os07g49114	2
GO:1902532	negative regulation of intracellular signal transduction	2/1602	10/15655	1.95	0.272935	0.503188	LOC_Os01g73280/LOC_Os09g39310	2
GO:1902904	negative regulation of supramolecular fiber organization	2/1602	10/15655	1.95	0.272935	0.503188	LOC_Os02g57120/LOC_Os11g29350	2
GO:0006342	chromatin silencing	2/1602	11/15655	1.78	0.312581	0.552042	LOC_Os03g05100/LOC_Os07g36130	2
GO:0006986	response to unfolded protein	2/1602	11/15655	1.78	0.312581	0.552042	LOC_Os01g62290/LOC_Os11g47760	2
GO:0009231	riboflavin biosynthetic process	2/1602	11/15655	1.78	0.312581	0.552042	LOC_Os03g02600/LOC_Os04g09810	2
GO:0009423	chorismate biosynthetic process	2/1602	11/15655	1.78	0.312581	0.552042	LOC_Os08g37790/LOC_Os09g36800	2
GO:0009646	response to absence of light	2/1602	11/15655	1.78	0.312581	0.552042	LOC_Os02g12790/LOC_Os03g58040	2
GO:0009736	cytokinin-activated signaling pathway	2/1602	11/15655	1.78	0.312581	0.552042	LOC_Os02g53530/LOC_Os03g11680	2
GO:0032970	regulation of actin filament-based process	2/1602	11/15655	1.78	0.312581	0.552042	LOC_Os09g35620/LOC_Os11g29350	2
GO:0034285	response to disaccharide	2/1602	11/15655	1.78	0.312581	0.552042	LOC_Os09g39310/LOC_Os11g05470	2
GO:0043066	negative regulation of apoptotic process	2/1602	11/15655	1.78	0.312581	0.552042	LOC_Os06g11990/LOC_Os09g35620	2
GO:0043401	steroid hormone mediated signaling pathway	2/1602	11/15655	1.78	0.312581	0.552042	LOC_Os05g50990/LOC_Os09g35620	2
GO:0043547	positive regulation of GTPase activity	2/1602	11/15655	1.78	0.312581	0.552042	LOC_Os02g56570/LOC_Os04g47700	2
GO:0051223	regulation of protein transport	2/1602	11/15655	1.78	0.312581	0.552042	LOC_Os04g47700/LOC_Os09g35620	2
GO:0051225	spindle assembly	2/1602	11/15655	1.78	0.312581	0.552042	LOC_Os04g42330/LOC_Os09g25500	2
GO:0051259	protein oligomerization	2/1602	11/15655	1.78	0.312581	0.552042	LOC_Os01g42090/LOC_Os09g35620	2
GO:0070201	regulation of establishment of protein localization	2/1602	11/15655	1.78	0.312581	0.552042	LOC_Os04g47700/LOC_Os09g35620	2
GO:0071383	cellular response to steroid hormone stimulus	2/1602	11/15655	1.78	0.312581	0.552042	LOC_Os05g50990/LOC_Os09g35620	2
GO:0090087	regulation of peptide transport	2/1602	11/15655	1.78	0.312581	0.552042	LOC_Os04g47700/LOC_Os09g35620	2
GO:0090697	post-embryonic plant organ morphogenesis	2/1602	11/15655	1.78	0.312581	0.552042	LOC_Os07g05470/Oryza_sativa_newGene_3643	2
GO:0006265	DNA topological change	2/1602	12/15655	1.63	0.351732	0.567741	LOC_Os03g06900/LOC_Os12g42760	2
GO:0009789	positive regulation of abscisic acid-activated signaling pathway	2/1602	12/15655	1.63	0.351732	0.567741	LOC_Os05g50990/LOC_Os09g37100	2
GO:0009832	plant-type cell wall biogenesis	2/1602	12/15655	1.63	0.351732	0.567741	LOC_Os03g11650/LOC_Os06g11990	2
GO:0012501	programmed cell death	2/1602	12/15655	1.63	0.351732	0.567741	LOC_Os09g35620/LOC_Os09g37100	2
GO:0016117	carotenoid biosynthetic process	2/1602	12/15655	1.63	0.351732	0.567741	LOC_Os02g45660/LOC_Os03g63010	2
GO:0030243	cellulose metabolic process	2/1602	12/15655	1.63	0.351732	0.567741	LOC_Os06g11990/Oryza_sativa_newGene_3279	2
GO:0030865	cortical cytoskeleton organization	2/1602	12/15655	1.63	0.351732	0.567741	LOC_Os02g57120/LOC_Os06g11990	2
GO:0032956	regulation of actin cytoskeleton organization	2/1602	12/15655	1.63	0.351732	0.567741	LOC_Os09g35620/LOC_Os11g29350	2
GO:0043549	regulation of kinase activity	2/1602	12/15655	1.63	0.351732	0.567741	LOC_Os04g31340/LOC_Os09g25550	2
GO:0048528	post-embryonic root development	2/1602	12/15655	1.63	0.351732	0.567741	LOC_Os07g05470/Oryza_sativa_newGene_3643	2
GO:0048545	response to steroid hormone	2/1602	12/15655	1.63	0.351732	0.567741	LOC_Os05g50990/LOC_Os09g35620	2
GO:0051050	positive regulation of transport	2/1602	12/15655	1.63	0.351732	0.567741	LOC_Os04g47700/LOC_Os09g35620	2
GO:0051273	beta-glucan metabolic process	2/1602	12/15655	1.63	0.351732	0.567741	LOC_Os06g11990/Oryza_sativa_newGene_3279	2
GO:0055046	microgametogenesis	2/1602	12/15655	1.63	0.351732	0.567741	LOC_Os03g23050/LOC_Os03g58600	2
GO:0090407	organophosphate biosynthetic process	2/1602	12/15655	1.63	0.351732	0.567741	LOC_Os01g08760/LOC_Os02g57400	2
GO:1902903	regulation of supramolecular fiber organization	2/1602	12/15655	1.63	0.351732	0.567741	LOC_Os02g57120/LOC_Os11g29350	2
GO:1903829	positive regulation of cellular protein localization	2/1602	12/15655	1.63	0.351732	0.567741	LOC_Os01g73280/LOC_Os09g35620	2
GO:0006081	cellular aldehyde metabolic process	2/1602	13/15655	1.5	0.390074	0.610481	LOC_Os02g43194/LOC_Os12g07810	2
GO:0006413	translational initiation	2/1602	13/15655	1.5	0.390074	0.610481	LOC_Os02g18180/LOC_Os07g07760	2
GO:0006857	oligopeptide transport	2/1602	13/15655	1.5	0.390074	0.610481	LOC_Os03g13250/LOC_Os03g60850	2
GO:0009561	megagametogenesis	2/1602	13/15655	1.5	0.390074	0.610481	LOC_Os03g23050/LOC_Os03g58600	2
GO:0009630	gravitropism	2/1602	13/15655	1.5	0.390074	0.610481	LOC_Os01g51590/LOC_Os04g01160	2
GO:0010305	leaf vascular tissue pattern formation	2/1602	13/15655	1.5	0.390074	0.610481	LOC_Os03g53990/LOC_Os05g50990	2
GO:0042594	response to starvation	2/1602	13/15655	1.5	0.390074	0.610481	LOC_Os01g01650/LOC_Os03g58040	2
GO:0048443	stamen development	2/1602	13/15655	1.5	0.390074	0.610481	LOC_Os05g32070/LOC_Os06g11990	2
GO:0072665	protein localization to vacuole	2/1602	13/15655	1.5	0.390074	0.610481	LOC_Os07g47400/LOC_Os11g05470	2
GO:0072666	establishment of protein localization to vacuole	2/1602	13/15655	1.5	0.390074	0.610481	LOC_Os07g47400/LOC_Os11g05470	2
GO:1901420	negative regulation of response to alcohol	2/1602	13/15655	1.5	0.390074	0.610481	LOC_Os02g53530/LOC_Os03g11680	2
GO:1901617	organic hydroxy compound biosynthetic process	2/1602	13/15655	1.5	0.390074	0.610481	LOC_Os02g57400/LOC_Os03g59610	2
GO:1905958	negative regulation of cellular response to alcohol	2/1602	13/15655	1.5	0.390074	0.610481	LOC_Os02g53530/LOC_Os03g11680	2
GO:0000381	regulation of alternative mRNA splicing, via spliceosome	2/1602	14/15655	1.4	0.427362	0.622276	LOC_Os05g40290/LOC_Os12g04940	2
GO:0008654	phospholipid biosynthetic process	2/1602	14/15655	1.4	0.427362	0.622276	LOC_Os01g08760/LOC_Os06g29650	2
GO:0031401	positive regulation of protein modification process	2/1602	14/15655	1.4	0.427362	0.622276	LOC_Os03g03920/LOC_Os09g35620	2
GO:0043254	regulation of protein complex assembly	2/1602	14/15655	1.4	0.427362	0.622276	LOC_Os09g35620/LOC_Os11g29350	2
GO:0048764	trichoblast maturation	2/1602	14/15655	1.4	0.427362	0.622276	LOC_Os10g10580/Oryza_sativa_newGene_3279	2
GO:0048765	root hair cell differentiation	2/1602	14/15655	1.4	0.427362	0.622276	LOC_Os10g10580/Oryza_sativa_newGene_3279	2
GO:0005985	sucrose metabolic process	2/1602	15/15655	1.3	0.46341	0.650782	LOC_Os03g28330/LOC_Os08g20660	2
GO:0006098	pentose-phosphate shunt	2/1602	15/15655	1.3	0.46341	0.650782	LOC_Os07g41280/LOC_Os08g05830	2
GO:0006515	misfolded or incompletely synthesized protein catabolic process	2/1602	15/15655	1.3	0.46341	0.650782	LOC_Os01g73280/LOC_Os07g48960	2
GO:0006904	vesicle docking involved in exocytosis	2/1602	15/15655	1.3	0.46341	0.650782	LOC_Os03g06760/LOC_Os06g33170	2
GO:0009308	amine metabolic process	2/1602	15/15655	1.3	0.46341	0.650782	LOC_Os06g23114/LOC_Os08g04130	2
GO:0016036	cellular response to phosphate starvation	2/1602	15/15655	1.3	0.46341	0.650782	LOC_Os05g48390/LOC_Os08g15030	2
GO:0016072	rRNA metabolic process	2/1602	15/15655	1.3	0.46341	0.650782	LOC_Os01g73280/LOC_Os10g25300	2
GO:0036293	response to decreased oxygen levels	2/1602	15/15655	1.3	0.46341	0.650782	LOC_Os03g03920/LOC_Os09g39310	2
GO:0043069	negative regulation of programmed cell death	2/1602	15/15655	1.3	0.46341	0.650782	LOC_Os06g11990/LOC_Os09g35620	2
GO:0043087	regulation of GTPase activity	2/1602	15/15655	1.3	0.46341	0.650782	LOC_Os02g56570/LOC_Os04g47700	2
GO:0048527	lateral root development	2/1602	15/15655	1.3	0.46341	0.650782	LOC_Os07g05470/Oryza_sativa_newGene_3643	2
GO:0051345	positive regulation of hydrolase activity	2/1602	15/15655	1.3	0.46341	0.650782	LOC_Os02g56570/LOC_Os04g47700	2
GO:0071897	DNA biosynthetic process	2/1602	15/15655	1.3	0.46341	0.650782	LOC_Os01g73280/LOC_Os11g39710	2
GO:0097306	cellular response to alcohol	2/1602	15/15655	1.3	0.46341	0.650782	LOC_Os03g62790/LOC_Os09g35620	2
GO:0097435	supramolecular fiber organization	2/1602	15/15655	1.3	0.46341	0.650782	LOC_Os02g57120/LOC_Os06g11990	2
GO:1905037	autophagosome organization	2/1602	15/15655	1.3	0.46341	0.650782	LOC_Os03g03920/LOC_Os06g42824	2
GO:1905393	plant organ formation	2/1602	15/15655	1.3	0.46341	0.650782	LOC_Os11g04600/LOC_Os12g04410	2
GO:0000387	spliceosomal snRNP assembly	2/1602	16/15655	1.22	0.498082	0.673017	LOC_Os02g08090/LOC_Os02g16640	2
GO:0001666	response to hypoxia	2/1602	16/15655	1.22	0.498082	0.673017	LOC_Os03g03920/LOC_Os09g39310	2
GO:0002831	regulation of response to biotic stimulus	2/1602	16/15655	1.22	0.498082	0.673017	LOC_Os01g73280/LOC_Os10g38930	2
GO:0006108	malate metabolic process	2/1602	16/15655	1.22	0.498082	0.673017	LOC_Os05g09440/LOC_Os08g33720	2
GO:0007264	small GTPase mediated signal transduction	2/1602	16/15655	1.22	0.498082	0.673017	LOC_Os07g16970/LOC_Os09g35620	2
GO:0010053	root epidermal cell differentiation	2/1602	16/15655	1.22	0.498082	0.673017	LOC_Os10g10580/Oryza_sativa_newGene_3279	2
GO:0010054	trichoblast differentiation	2/1602	16/15655	1.22	0.498082	0.673017	LOC_Os10g10580/Oryza_sativa_newGene_3279	2
GO:0042542	response to hydrogen peroxide	2/1602	16/15655	1.22	0.498082	0.673017	LOC_Os02g11720/LOC_Os03g16020	2
GO:0070482	response to oxygen levels	2/1602	16/15655	1.22	0.498082	0.673017	LOC_Os03g03920/LOC_Os09g39310	2
GO:1903827	regulation of cellular protein localization	2/1602	16/15655	1.22	0.498082	0.673017	LOC_Os01g73280/LOC_Os09g35620	2
GO:0006075	(1->3)-beta-D-glucan biosynthetic process	2/1602	17/15655	1.15	0.531282	0.686928	LOC_Os01g48200/Oryza_sativa_newGene_3344	2
GO:0009860	pollen tube growth	2/1602	17/15655	1.15	0.531282	0.686928	LOC_Os03g18200/LOC_Os06g46754	2
GO:0010638	positive regulation of organelle organization	2/1602	17/15655	1.15	0.531282	0.686928	LOC_Os06g24070/LOC_Os09g35620	2
GO:0010639	negative regulation of organelle organization	2/1602	17/15655	1.15	0.531282	0.686928	LOC_Os02g57120/LOC_Os11g29350	2
GO:0032101	regulation of response to external stimulus	2/1602	17/15655	1.15	0.531282	0.686928	LOC_Os01g73280/LOC_Os10g38930	2
GO:0032482	Rab protein signal transduction	2/1602	17/15655	1.15	0.531282	0.686928	LOC_Os03g13860/LOC_Os10g30520	2
GO:0036503	ERAD pathway	2/1602	17/15655	1.15	0.531282	0.686928	LOC_Os01g73280/LOC_Os03g03920	2
GO:0071482	cellular response to light stimulus	2/1602	17/15655	1.15	0.531282	0.686928	LOC_Os01g01340/LOC_Os03g62790	2
GO:0090627	plant epidermal cell differentiation	2/1602	17/15655	1.15	0.531282	0.686928	LOC_Os10g10580/Oryza_sativa_newGene_3279	2
GO:1900864	mitochondrial RNA modification	2/1602	17/15655	1.15	0.531282	0.686928	LOC_Os02g42210/LOC_Os04g28310	2
GO:0006338	chromatin remodeling	2/1602	18/15655	1.09	0.562947	0.719601	LOC_Os01g67850/LOC_Os09g35620	2
GO:0006400	tRNA modification	2/1602	18/15655	1.09	0.562947	0.719601	LOC_Os05g24660/LOC_Os10g25300	2
GO:0006812	cation transport	2/1602	18/15655	1.09	0.562947	0.719601	LOC_Os09g09930/LOC_Os10g30070	2
GO:0010073	meristem maintenance	2/1602	18/15655	1.09	0.562947	0.719601	LOC_Os11g04600/LOC_Os12g04410	2
GO:0010150	leaf senescence	2/1602	18/15655	1.09	0.562947	0.719601	LOC_Os05g05600/LOC_Os07g49114	2
GO:0016556	mRNA modification	2/1602	18/15655	1.09	0.562947	0.719601	LOC_Os02g42210/LOC_Os04g28310	2
GO:0045786	negative regulation of cell cycle	2/1602	18/15655	1.09	0.562947	0.719601	LOC_Os01g08880/LOC_Os09g35620	2
GO:0051186	cofactor metabolic process	2/1602	18/15655	1.09	0.562947	0.719601	LOC_Os01g27360/LOC_Os03g57200	2
GO:0060548	negative regulation of cell death	2/1602	18/15655	1.09	0.562947	0.719601	LOC_Os06g11990/LOC_Os09g35620	2
GO:0061077	chaperone-mediated protein folding	2/1602	18/15655	1.09	0.562947	0.719601	LOC_Os01g38359/LOC_Os07g38230	2
GO:0090501	RNA phosphodiester bond hydrolysis	2/1602	18/15655	1.09	0.562947	0.719601	LOC_Os01g04200/LOC_Os11g39710	2
GO:0090696	post-embryonic plant organ development	2/1602	18/15655	1.09	0.562947	0.719601	LOC_Os07g05470/Oryza_sativa_newGene_3643	2
GO:0006897	endocytosis	2/1602	19/15655	1.03	0.593045	0.730508	LOC_Os06g47330/LOC_Os10g10580	2
GO:0009967	positive regulation of signal transduction	2/1602	19/15655	1.03	0.593045	0.730508	LOC_Os05g50990/LOC_Os09g35620	2
GO:0023056	positive regulation of signaling	2/1602	19/15655	1.03	0.593045	0.730508	LOC_Os05g50990/LOC_Os09g35620	2
GO:0030433	ubiquitin-dependent ERAD pathway	2/1602	19/15655	1.03	0.593045	0.730508	LOC_Os01g73280/LOC_Os03g03920	2
GO:0031669	cellular response to nutrient levels	2/1602	19/15655	1.03	0.593045	0.730508	LOC_Os01g01650/LOC_Os03g58040	2
GO:0044042	glucan metabolic process	2/1602	19/15655	1.03	0.593045	0.730508	LOC_Os06g11990/Oryza_sativa_newGene_3279	2
GO:0071695	anatomical structure maturation	2/1602	19/15655	1.03	0.593045	0.730508	LOC_Os10g10580/Oryza_sativa_newGene_3279	2
GO:2000022	regulation of jasmonic acid mediated signaling pathway	2/1602	19/15655	1.03	0.593045	0.730508	LOC_Os04g32480/LOC_Os07g05830	2
GO:0000959	mitochondrial RNA metabolic process	2/1602	20/15655	0.98	0.621564	0.74795	LOC_Os02g42210/LOC_Os04g28310	2
GO:0006820	anion transport	2/1602	20/15655	0.98	0.621564	0.74795	LOC_Os02g43770/LOC_Os10g03400	2
GO:0010224	response to UV-B	2/1602	20/15655	0.98	0.621564	0.74795	LOC_Os04g56700/LOC_Os07g04730	2
GO:0016236	macroautophagy	2/1602	20/15655	0.98	0.621564	0.74795	LOC_Os03g03920/LOC_Os06g42824	2
GO:0032270	positive regulation of cellular protein metabolic process	2/1602	20/15655	0.98	0.621564	0.74795	LOC_Os03g03920/LOC_Os09g35620	2
GO:0044264	cellular polysaccharide metabolic process	2/1602	20/15655	0.98	0.621564	0.74795	LOC_Os06g11990/Oryza_sativa_newGene_3279	2
GO:0048438	floral whorl development	2/1602	20/15655	0.98	0.621564	0.74795	LOC_Os05g32070/LOC_Os06g11990	2
GO:0000302	response to reactive oxygen species	2/1602	21/15655	0.93	0.648512	0.772093	LOC_Os02g11720/LOC_Os07g49114	2
GO:0000910	cytokinesis	2/1602	21/15655	0.93	0.648512	0.772093	LOC_Os06g11990/LOC_Os12g40260	2
GO:0003333	amino acid transmembrane transport	2/1602	21/15655	0.93	0.648512	0.772093	LOC_Os01g65660/LOC_Os04g47780	2
GO:0009751	response to salicylic acid	2/1602	21/15655	0.93	0.648512	0.772093	LOC_Os03g60220/LOC_Os07g47590	2
GO:0031667	response to nutrient levels	2/1602	21/15655	0.93	0.648512	0.772093	LOC_Os01g01650/LOC_Os03g58040	2
GO:0043900	regulation of multi-organism process	2/1602	21/15655	0.93	0.648512	0.772093	LOC_Os01g73280/LOC_Os10g38930	2
GO:0051247	positive regulation of protein metabolic process	2/1602	21/15655	0.93	0.648512	0.772093	LOC_Os03g03920/LOC_Os09g35620	2
GO:0061640	cytoskeleton-dependent cytokinesis	2/1602	21/15655	0.93	0.648512	0.772093	LOC_Os06g11990/LOC_Os12g40260	2
GO:0061919	process utilizing autophagic mechanism	2/1602	21/15655	0.93	0.648512	0.772093	LOC_Os03g03920/LOC_Os06g42824	2
GO:0080156	mitochondrial mRNA modification	2/1602	21/15655	0.93	0.648512	0.772093	LOC_Os02g42210/LOC_Os04g28310	2
GO:0080167	response to karrikin	2/1602	21/15655	0.93	0.648512	0.772093	LOC_Os01g44069/LOC_Os03g57200	2
GO:0000027	ribosomal large subunit assembly	2/1602	22/15655	0.89	0.673911	0.783802	LOC_Os11g04070/LOC_Os12g03880	2
GO:0000281	mitotic cytokinesis	2/1602	22/15655	0.89	0.673911	0.783802	LOC_Os06g11990/LOC_Os12g40260	2
GO:0009411	response to UV	2/1602	22/15655	0.89	0.673911	0.783802	LOC_Os02g10990/LOC_Os07g04730	2
GO:0010647	positive regulation of cell communication	2/1602	22/15655	0.89	0.673911	0.783802	LOC_Os05g50990/LOC_Os09g35620	2
GO:0034655	nucleobase-containing compound catabolic process	2/1602	22/15655	0.89	0.673911	0.783802	LOC_Os01g73280/LOC_Os09g39440	2
GO:0005976	polysaccharide metabolic process	2/1602	23/15655	0.85	0.697797	0.800136	LOC_Os06g11990/Oryza_sativa_newGene_3279	2
GO:0006623	protein targeting to vacuole	2/1602	23/15655	0.85	0.697797	0.800136	LOC_Os07g47400/LOC_Os11g05470	2
GO:0034660	ncRNA metabolic process	2/1602	23/15655	0.85	0.697797	0.800136	LOC_Os01g73280/LOC_Os10g25300	2
GO:0044087	regulation of cellular component biogenesis	2/1602	23/15655	0.85	0.697797	0.800136	LOC_Os09g35620/LOC_Os11g29350	2
GO:0044270	cellular nitrogen compound catabolic process	2/1602	23/15655	0.85	0.697797	0.800136	LOC_Os01g73280/LOC_Os09g39440	2
GO:0046700	heterocycle catabolic process	2/1602	23/15655	0.85	0.697797	0.800136	LOC_Os01g73280/LOC_Os09g39440	2
GO:0007005	mitochondrion organization	2/1602	24/15655	0.81	0.720212	0.820541	LOC_Os04g33770/LOC_Os10g10580	2
GO:0006073	cellular glucan metabolic process	2/1602	25/15655	0.78	0.741208	0.835768	LOC_Os06g11990/Oryza_sativa_newGene_3279	2
GO:0010228	vegetative to reproductive phase transition of meristem	2/1602	25/15655	0.78	0.741208	0.835768	LOC_Os05g05600/LOC_Os09g33850	2
GO:0019637	organophosphate metabolic process	2/1602	25/15655	0.78	0.741208	0.835768	LOC_Os01g08760/LOC_Os02g57400	2
GO:0000045	autophagosome assembly	2/1602	26/15655	0.75	0.760839	0.845327	LOC_Os03g03920/LOC_Os06g42824	2
GO:0001732	formation of cytoplasmic translation initiation complex	2/1602	26/15655	0.75	0.760839	0.845327	LOC_Os01g12870/LOC_Os05g01450	2
GO:0006644	phospholipid metabolic process	2/1602	26/15655	0.75	0.760839	0.845327	LOC_Os01g08760/LOC_Os01g49820	2
GO:0007033	vacuole organization	2/1602	26/15655	0.75	0.760839	0.845327	LOC_Os03g03920/LOC_Os06g42824	2
GO:0009723	response to ethylene	2/1602	26/15655	0.75	0.760839	0.845327	LOC_Os01g09280/LOC_Os09g39310	2
GO:0010256	endomembrane system organization	2/1602	26/15655	0.75	0.760839	0.845327	LOC_Os01g73280/LOC_Os06g42824	2
GO:0032269	negative regulation of cellular protein metabolic process	2/1602	27/15655	0.72	0.779166	0.852674	LOC_Os03g62790/LOC_Os09g35620	2
GO:0042127	regulation of cell proliferation	2/1602	27/15655	0.72	0.779166	0.852674	LOC_Os09g35620/LOC_Os11g29380	2
GO:0051248	negative regulation of protein metabolic process	2/1602	27/15655	0.72	0.779166	0.852674	LOC_Os03g62790/LOC_Os09g35620	2
GO:0007015	actin filament organization	2/1602	28/15655	0.7	0.796249	0.865629	LOC_Os06g29350/Oryza_sativa_newGene_1257	2
GO:0051865	protein autoubiquitination	2/1602	28/15655	0.7	0.796249	0.865629	LOC_Os01g74320/LOC_Os05g39930	2
GO:1903046	meiotic cell cycle process	2/1602	28/15655	0.7	0.796249	0.865629	LOC_Os03g23050/LOC_Os10g03400	2
GO:0007346	regulation of mitotic cell cycle	2/1602	30/15655	0.65	0.826935	0.885749	LOC_Os02g44642/LOC_Os09g35620	2
GO:0040008	regulation of growth	2/1602	30/15655	0.65	0.826935	0.885749	LOC_Os04g38480/LOC_Os06g16300	2
GO:0022603	regulation of anatomical structure morphogenesis	2/1602	31/15655	0.63	0.840662	0.895341	LOC_Os06g11990/LOC_Os09g35620	2
GO:0022613	ribonucleoprotein complex biogenesis	2/1602	31/15655	0.63	0.840662	0.895341	LOC_Os07g07760/LOC_Os10g25300	2
GO:0061024	membrane organization	2/1602	31/15655	0.63	0.840662	0.895341	LOC_Os06g42824/LOC_Os10g03400	2
GO:0072594	establishment of protein localization to organelle	2/1602	32/15655	0.61	0.853394	0.908505	LOC_Os07g47400/LOC_Os11g05470	2
GO:0048878	chemical homeostasis	2/1602	33/15655	0.59	0.865191	0.916662	LOC_Os01g55940/LOC_Os09g09930	2
GO:0006605	protein targeting	2/1602	34/15655	0.57	0.876111	0.923817	LOC_Os07g47400/LOC_Os11g05470	2
GO:0048831	regulation of shoot system development	2/1602	35/15655	0.56	0.886209	0.928444	LOC_Os09g33850/LOC_Os11g05470	2
GO:0042254	ribosome biogenesis	2/1602	36/15655	0.54	0.89554	0.934451	LOC_Os07g07760/LOC_Os10g25300	2
GO:1902680	positive regulation of RNA biosynthetic process	2/1602	39/15655	0.5	0.919424	0.953819	LOC_Os04g51130/LOC_Os09g35620	2
GO:1903508	positive regulation of nucleic acid-templated transcription	2/1602	39/15655	0.5	0.919424	0.953819	LOC_Os04g51130/LOC_Os09g35620	2
GO:0051254	positive regulation of RNA metabolic process	2/1602	40/15655	0.49	0.926172	0.95772	LOC_Os04g51130/LOC_Os09g35620	2
GO:0016569	covalent chromatin modification	2/1602	41/15655	0.48	0.932383	0.96122	LOC_Os01g67850/LOC_Os03g23050	2
GO:0034622	cellular macromolecular complex assembly	2/1602	43/15655	0.45	0.943351	0.969159	LOC_Os02g57120/LOC_Os11g01490	2
GO:0006888	ER to Golgi vesicle-mediated transport	2/1602	44/15655	0.44	0.948178	0.972071	LOC_Os04g33690/LOC_Os06g41590	2
GO:0010557	positive regulation of macromolecule biosynthetic process	2/1602	47/15655	0.42	0.960414	0.981316	LOC_Os04g51130/LOC_Os09g35620	2
GO:0016570	histone modification	2/1602	48/15655	0.41	0.963838	0.983989	LOC_Os01g67850/LOC_Os03g23050	2
GO:0031328	positive regulation of cellular biosynthetic process	2/1602	49/15655	0.4	0.966976	0.985543	LOC_Os04g51130/LOC_Os09g35620	2
GO:0010628	positive regulation of gene expression	2/1602	51/15655	0.38	0.972484	0.989915	LOC_Os04g51130/LOC_Os09g35620	2
GO:0009891	positive regulation of biosynthetic process	2/1602	52/15655	0.38	0.974894	0.991633	LOC_Os04g51130/LOC_Os09g35620	2
GO:0000024	maltose biosynthetic process	1/1602	1/15655	9.77	0.102332	0.33101	LOC_Os10g41550	1
GO:0000132	establishment of mitotic spindle orientation	1/1602	1/15655	9.77	0.102332	0.33101	LOC_Os09g35620	1
GO:0000154	rRNA modification	1/1602	1/15655	9.77	0.102332	0.33101	LOC_Os10g25300	1
GO:0000451	rRNA 2'-O-methylation	1/1602	1/15655	9.77	0.102332	0.33101	LOC_Os10g25300	1
GO:0000494	box C/D snoRNA 3'-end processing	1/1602	1/15655	9.77	0.102332	0.33101	LOC_Os05g08360	1
GO:0001501	skeletal system development	1/1602	1/15655	9.77	0.102332	0.33101	LOC_Os09g35620	1
GO:0001569	branching involved in blood vessel morphogenesis	1/1602	1/15655	9.77	0.102332	0.33101	LOC_Os09g35620	1
GO:0001656	metanephros development	1/1602	1/15655	9.77	0.102332	0.33101	LOC_Os09g35620	1
GO:0001657	ureteric bud development	1/1602	1/15655	9.77	0.102332	0.33101	LOC_Os09g35620	1
GO:0001658	branching involved in ureteric bud morphogenesis	1/1602	1/15655	9.77	0.102332	0.33101	LOC_Os09g35620	1
GO:0001667	ameboidal-type cell migration	1/1602	1/15655	9.77	0.102332	0.33101	LOC_Os09g35620	1
GO:0001700	embryonic development via the syncytial blastoderm	1/1602	1/15655	9.77	0.102332	0.33101	LOC_Os09g35620	1
GO:0001702	gastrulation with mouth forming second	1/1602	1/15655	9.77	0.102332	0.33101	LOC_Os09g35620	1
GO:0001703	gastrulation with mouth forming first	1/1602	1/15655	9.77	0.102332	0.33101	LOC_Os09g35620	1
GO:0001711	endodermal cell fate commitment	1/1602	1/15655	9.77	0.102332	0.33101	LOC_Os09g35620	1
GO:0001745	compound eye morphogenesis	1/1602	1/15655	9.77	0.102332	0.33101	LOC_Os09g35620	1
GO:0001759	organ induction	1/1602	1/15655	9.77	0.102332	0.33101	LOC_Os09g35620	1
GO:0001764	neuron migration	1/1602	1/15655	9.77	0.102332	0.33101	LOC_Os09g35620	1
GO:0001819	positive regulation of cytokine production	1/1602	1/15655	9.77	0.102332	0.33101	LOC_Os09g35620	1
GO:0001823	mesonephros development	1/1602	1/15655	9.77	0.102332	0.33101	LOC_Os09g35620	1
GO:0001837	epithelial to mesenchymal transition	1/1602	1/15655	9.77	0.102332	0.33101	LOC_Os09g35620	1
GO:0001838	embryonic epithelial tube formation	1/1602	1/15655	9.77	0.102332	0.33101	LOC_Os09g35620	1
GO:0001840	neural plate development	1/1602	1/15655	9.77	0.102332	0.33101	LOC_Os09g35620	1
GO:0001885	endothelial cell development	1/1602	1/15655	9.77	0.102332	0.33101	LOC_Os09g35620	1
GO:0001942	hair follicle development	1/1602	1/15655	9.77	0.102332	0.33101	LOC_Os09g35620	1
GO:0001954	positive regulation of cell-matrix adhesion	1/1602	1/15655	9.77	0.102332	0.33101	LOC_Os09g35620	1
GO:0002027	regulation of heart rate	1/1602	1/15655	9.77	0.102332	0.33101	LOC_Os09g35620	1
GO:0002052	positive regulation of neuroblast proliferation	1/1602	1/15655	9.77	0.102332	0.33101	LOC_Os09g35620	1
GO:0002053	positive regulation of mesenchymal cell proliferation	1/1602	1/15655	9.77	0.102332	0.33101	LOC_Os09g35620	1
GO:0002088	lens development in camera-type eye	1/1602	1/15655	9.77	0.102332	0.33101	LOC_Os09g35620	1
GO:0002089	lens morphogenesis in camera-type eye	1/1602	1/15655	9.77	0.102332	0.33101	LOC_Os09g35620	1
GO:0002119	nematode larval development	1/1602	1/15655	9.77	0.102332	0.33101	LOC_Os09g35620	1
GO:0002159	desmosome assembly	1/1602	1/15655	9.77	0.102332	0.33101	LOC_Os09g35620	1
GO:0002274	myeloid leukocyte activation	1/1602	1/15655	9.77	0.102332	0.33101	LOC_Os09g35620	1
GO:0002275	myeloid cell activation involved in immune response	1/1602	1/15655	9.77	0.102332	0.33101	LOC_Os09g35620	1
GO:0002283	neutrophil activation involved in immune response	1/1602	1/15655	9.77	0.102332	0.33101	LOC_Os09g35620	1
GO:0002444	myeloid leukocyte mediated immunity	1/1602	1/15655	9.77	0.102332	0.33101	LOC_Os09g35620	1
GO:0002446	neutrophil mediated immunity	1/1602	1/15655	9.77	0.102332	0.33101	LOC_Os09g35620	1
GO:0002521	leukocyte differentiation	1/1602	1/15655	9.77	0.102332	0.33101	LOC_Os09g35620	1
GO:0002573	myeloid leukocyte differentiation	1/1602	1/15655	9.77	0.102332	0.33101	LOC_Os09g35620	1
GO:0002934	desmosome organization	1/1602	1/15655	9.77	0.102332	0.33101	LOC_Os09g35620	1
GO:0003156	regulation of animal organ formation	1/1602	1/15655	9.77	0.102332	0.33101	LOC_Os09g35620	1
GO:0003158	endothelium development	1/1602	1/15655	9.77	0.102332	0.33101	LOC_Os09g35620	1
GO:0003159	morphogenesis of an endothelium	1/1602	1/15655	9.77	0.102332	0.33101	LOC_Os09g35620	1
GO:0003206	cardiac chamber morphogenesis	1/1602	1/15655	9.77	0.102332	0.33101	LOC_Os09g35620	1
GO:0003208	cardiac ventricle morphogenesis	1/1602	1/15655	9.77	0.102332	0.33101	LOC_Os09g35620	1
GO:0003223	ventricular compact myocardium morphogenesis	1/1602	1/15655	9.77	0.102332	0.33101	LOC_Os09g35620	1
GO:0003229	ventricular cardiac muscle tissue development	1/1602	1/15655	9.77	0.102332	0.33101	LOC_Os09g35620	1
GO:0003231	cardiac ventricle development	1/1602	1/15655	9.77	0.102332	0.33101	LOC_Os09g35620	1
GO:0003264	regulation of cardioblast proliferation	1/1602	1/15655	9.77	0.102332	0.33101	LOC_Os09g35620	1
GO:0003266	regulation of secondary heart field cardioblast proliferation	1/1602	1/15655	9.77	0.102332	0.33101	LOC_Os09g35620	1
GO:0003306	Wnt signaling pathway involved in heart development	1/1602	1/15655	9.77	0.102332	0.33101	LOC_Os09g35620	1
GO:0003338	metanephros morphogenesis	1/1602	1/15655	9.77	0.102332	0.33101	LOC_Os09g35620	1
GO:0003339	regulation of mesenchymal to epithelial transition involved in metanephros morphogenesis	1/1602	1/15655	9.77	0.102332	0.33101	LOC_Os09g35620	1
GO:0003340	negative regulation of mesenchymal to epithelial transition involved in metanephros morphogenesis	1/1602	1/15655	9.77	0.102332	0.33101	LOC_Os09g35620	1
GO:0005993	trehalose catabolic process	1/1602	1/15655	9.77	0.102332	0.33101	LOC_Os10g37660	1
GO:0006223	uracil salvage	1/1602	1/15655	9.77	0.102332	0.33101	LOC_Os05g38170	1
GO:0006227	dUDP biosynthetic process	1/1602	1/15655	9.77	0.102332	0.33101	LOC_Os07g44630	1
GO:0006233	dTDP biosynthetic process	1/1602	1/15655	9.77	0.102332	0.33101	LOC_Os07g44630	1
GO:0006235	dTTP biosynthetic process	1/1602	1/15655	9.77	0.102332	0.33101	LOC_Os07g44630	1
GO:0006253	dCTP catabolic process	1/1602	1/15655	9.77	0.102332	0.33101	LOC_Os04g43550	1
GO:0006404	RNA import into nucleus	1/1602	1/15655	9.77	0.102332	0.33101	LOC_Os12g16290	1
GO:0006517	protein deglycosylation	1/1602	1/15655	9.77	0.102332	0.33101	LOC_Os11g32260	1
GO:0006540	glutamate decarboxylation to succinate	1/1602	1/15655	9.77	0.102332	0.33101	LOC_Os02g07760	1
GO:0006560	proline metabolic process	1/1602	1/15655	9.77	0.102332	0.33101	LOC_Os03g59610	1
GO:0006561	proline biosynthetic process	1/1602	1/15655	9.77	0.102332	0.33101	LOC_Os03g59610	1
GO:0006562	proline catabolic process	1/1602	1/15655	9.77	0.102332	0.33101	LOC_Os10g40360	1
GO:0006573	valine metabolic process	1/1602	1/15655	9.77	0.102332	0.33101	LOC_Os07g09060	1
GO:0006937	regulation of muscle contraction	1/1602	1/15655	9.77	0.102332	0.33101	LOC_Os09g35620	1
GO:0006942	regulation of striated muscle contraction	1/1602	1/15655	9.77	0.102332	0.33101	LOC_Os09g35620	1
GO:0007160	cell-matrix adhesion	1/1602	1/15655	9.77	0.102332	0.33101	LOC_Os09g35620	1
GO:0007223	Wnt signaling pathway, calcium modulating pathway	1/1602	1/15655	9.77	0.102332	0.33101	LOC_Os09g35620	1
GO:0007268	chemical synaptic transmission	1/1602	1/15655	9.77	0.102332	0.33101	LOC_Os09g35620	1
GO:0007365	periodic partitioning	1/1602	1/15655	9.77	0.102332	0.33101	LOC_Os09g35620	1
GO:0007367	segment polarity determination	1/1602	1/15655	9.77	0.102332	0.33101	LOC_Os09g35620	1
GO:0007370	ventral furrow formation	1/1602	1/15655	9.77	0.102332	0.33101	LOC_Os09g35620	1
GO:0007391	dorsal closure	1/1602	1/15655	9.77	0.102332	0.33101	LOC_Os09g35620	1
GO:0007403	glial cell fate determination	1/1602	1/15655	9.77	0.102332	0.33101	LOC_Os09g35620	1
GO:0007440	foregut morphogenesis	1/1602	1/15655	9.77	0.102332	0.33101	LOC_Os09g35620	1
GO:0007494	midgut development	1/1602	1/15655	9.77	0.102332	0.33101	LOC_Os09g35620	1
GO:0007517	muscle organ development	1/1602	1/15655	9.77	0.102332	0.33101	LOC_Os09g35620	1
GO:0007548	sex differentiation	1/1602	1/15655	9.77	0.102332	0.33101	LOC_Os09g35620	1
GO:0007591	molting cycle, chitin-based cuticle	1/1602	1/15655	9.77	0.102332	0.33101	LOC_Os09g35620	1
GO:0007612	learning	1/1602	1/15655	9.77	0.102332	0.33101	LOC_Os12g16290	1
GO:0007617	mating behavior	1/1602	1/15655	9.77	0.102332	0.33101	LOC_Os09g35620	1
GO:0007618	mating	1/1602	1/15655	9.77	0.102332	0.33101	LOC_Os09g35620	1
GO:0007635	chemosensory behavior	1/1602	1/15655	9.77	0.102332	0.33101	LOC_Os12g16290	1
GO:0008016	regulation of heart contraction	1/1602	1/15655	9.77	0.102332	0.33101	LOC_Os09g35620	1
GO:0008306	associative learning	1/1602	1/15655	9.77	0.102332	0.33101	LOC_Os12g16290	1
GO:0008340	determination of adult lifespan	1/1602	1/15655	9.77	0.102332	0.33101	LOC_Os09g35620	1
GO:0008347	glial cell migration	1/1602	1/15655	9.77	0.102332	0.33101	LOC_Os09g35620	1
GO:0008355	olfactory learning	1/1602	1/15655	9.77	0.102332	0.33101	LOC_Os12g16290	1
GO:0008363	larval chitin-based cuticle development	1/1602	1/15655	9.77	0.102332	0.33101	LOC_Os09g35620	1
GO:0008406	gonad development	1/1602	1/15655	9.77	0.102332	0.33101	LOC_Os09g35620	1
GO:0008587	imaginal disc-derived wing margin morphogenesis	1/1602	1/15655	9.77	0.102332	0.33101	LOC_Os09g35620	1
GO:0009263	deoxyribonucleotide biosynthetic process	1/1602	1/15655	9.77	0.102332	0.33101	LOC_Os06g14620	1
GO:0009450	gamma-aminobutyric acid catabolic process	1/1602	1/15655	9.77	0.102332	0.33101	LOC_Os02g07760	1
GO:0009650	UV protection	1/1602	1/15655	9.77	0.102332	0.33101	LOC_Os08g01130	1
GO:0009687	abscisic acid metabolic process	1/1602	1/15655	9.77	0.102332	0.33101	LOC_Os03g59610	1
GO:0009697	salicylic acid biosynthetic process	1/1602	1/15655	9.77	0.102332	0.33101	LOC_Os07g47590	1
GO:0009794	regulation of mitotic cell cycle, embryonic	1/1602	1/15655	9.77	0.102332	0.33101	LOC_Os09g35620	1
GO:0009833	plant-type primary cell wall biogenesis	1/1602	1/15655	9.77	0.102332	0.33101	LOC_Os06g11990	1
GO:0009852	auxin catabolic process	1/1602	1/15655	9.77	0.102332	0.33101	LOC_Os04g39980	1
GO:0009950	dorsal/ventral axis specification	1/1602	1/15655	9.77	0.102332	0.33101	LOC_Os09g35620	1
GO:0010001	glial cell differentiation	1/1602	1/15655	9.77	0.102332	0.33101	LOC_Os09g35620	1
GO:0010004	gastrulation involving germ band extension	1/1602	1/15655	9.77	0.102332	0.33101	LOC_Os09g35620	1
GO:0010171	body morphogenesis	1/1602	1/15655	9.77	0.102332	0.33101	LOC_Os09g35620	1
GO:0010172	embryonic body morphogenesis	1/1602	1/15655	9.77	0.102332	0.33101	LOC_Os09g35620	1
GO:0010196	nonphotochemical quenching	1/1602	1/15655	9.77	0.102332	0.33101	LOC_Os01g64960	1
GO:0010259	multicellular organism aging	1/1602	1/15655	9.77	0.102332	0.33101	LOC_Os09g35620	1
GO:0010262	somatic embryogenesis	1/1602	1/15655	9.77	0.102332	0.33101	LOC_Os04g38480	1
GO:0010266	response to vitamin B1	1/1602	1/15655	9.77	0.102332	0.33101	LOC_Os03g47610	1
GO:0010273	detoxification of copper ion	1/1602	1/15655	9.77	0.102332	0.33101	LOC_Os04g46940	1
GO:0010463	mesenchymal cell proliferation	1/1602	1/15655	9.77	0.102332	0.33101	LOC_Os09g35620	1
GO:0010464	regulation of mesenchymal cell proliferation	1/1602	1/15655	9.77	0.102332	0.33101	LOC_Os09g35620	1
GO:0010478	chlororespiration	1/1602	1/15655	9.77	0.102332	0.33101	LOC_Os03g38950	1
GO:0010559	regulation of glycoprotein biosynthetic process	1/1602	1/15655	9.77	0.102332	0.33101	LOC_Os09g35620	1
GO:0010560	positive regulation of glycoprotein biosynthetic process	1/1602	1/15655	9.77	0.102332	0.33101	LOC_Os09g35620	1
GO:0010569	regulation of double-strand break repair via homologous recombination	1/1602	1/15655	9.77	0.102332	0.33101	LOC_Os01g40980	1
GO:0010596	negative regulation of endothelial cell migration	1/1602	1/15655	9.77	0.102332	0.33101	LOC_Os09g35620	1
GO:0010633	negative regulation of epithelial cell migration	1/1602	1/15655	9.77	0.102332	0.33101	LOC_Os09g35620	1
GO:0010717	regulation of epithelial to mesenchymal transition	1/1602	1/15655	9.77	0.102332	0.33101	LOC_Os09g35620	1
GO:0010718	positive regulation of epithelial to mesenchymal transition	1/1602	1/15655	9.77	0.102332	0.33101	LOC_Os09g35620	1
GO:0010720	positive regulation of cell development	1/1602	1/15655	9.77	0.102332	0.33101	LOC_Os09g35620	1
GO:0010811	positive regulation of cell-substrate adhesion	1/1602	1/15655	9.77	0.102332	0.33101	LOC_Os09g35620	1
GO:0010908	regulation of heparan sulfate proteoglycan biosynthetic process	1/1602	1/15655	9.77	0.102332	0.33101	LOC_Os09g35620	1
GO:0010909	positive regulation of heparan sulfate proteoglycan biosynthetic process	1/1602	1/15655	9.77	0.102332	0.33101	LOC_Os09g35620	1
GO:0014009	glial cell proliferation	1/1602	1/15655	9.77	0.102332	0.33101	LOC_Os09g35620	1
GO:0014010	Schwann cell proliferation	1/1602	1/15655	9.77	0.102332	0.33101	LOC_Os09g35620	1
GO:0014016	neuroblast differentiation	1/1602	1/15655	9.77	0.102332	0.33101	LOC_Os09g35620	1
GO:0014017	neuroblast fate commitment	1/1602	1/15655	9.77	0.102332	0.33101	LOC_Os09g35620	1
GO:0014019	neuroblast development	1/1602	1/15655	9.77	0.102332	0.33101	LOC_Os09g35620	1
GO:0014045	establishment of endothelial blood-brain barrier	1/1602	1/15655	9.77	0.102332	0.33101	LOC_Os09g35620	1
GO:0014706	striated muscle tissue development	1/1602	1/15655	9.77	0.102332	0.33101	LOC_Os09g35620	1
GO:0014823	response to activity	1/1602	1/15655	9.77	0.102332	0.33101	LOC_Os09g35620	1
GO:0014855	striated muscle cell proliferation	1/1602	1/15655	9.77	0.102332	0.33101	LOC_Os09g35620	1
GO:0016202	regulation of striated muscle tissue development	1/1602	1/15655	9.77	0.102332	0.33101	LOC_Os09g35620	1
GO:0016331	morphogenesis of embryonic epithelium	1/1602	1/15655	9.77	0.102332	0.33101	LOC_Os09g35620	1
GO:0016525	negative regulation of angiogenesis	1/1602	1/15655	9.77	0.102332	0.33101	LOC_Os09g35620	1
GO:0018991	oviposition	1/1602	1/15655	9.77	0.102332	0.33101	LOC_Os09g35620	1
GO:0019098	reproductive behavior	1/1602	1/15655	9.77	0.102332	0.33101	LOC_Os09g35620	1
GO:0019310	inositol catabolic process	1/1602	1/15655	9.77	0.102332	0.33101	LOC_Os06g36560	1
GO:0019354	siroheme biosynthetic process	1/1602	1/15655	9.77	0.102332	0.33101	LOC_Os01g44050	1
GO:0021537	telencephalon development	1/1602	1/15655	9.77	0.102332	0.33101	LOC_Os09g35620	1
GO:0021543	pallium development	1/1602	1/15655	9.77	0.102332	0.33101	LOC_Os09g35620	1
GO:0021545	cranial nerve development	1/1602	1/15655	9.77	0.102332	0.33101	LOC_Os09g35620	1
GO:0021675	nerve development	1/1602	1/15655	9.77	0.102332	0.33101	LOC_Os09g35620	1
GO:0021781	glial cell fate commitment	1/1602	1/15655	9.77	0.102332	0.33101	LOC_Os09g35620	1
GO:0021795	cerebral cortex cell migration	1/1602	1/15655	9.77	0.102332	0.33101	LOC_Os09g35620	1
GO:0021799	cerebral cortex radially oriented cell migration	1/1602	1/15655	9.77	0.102332	0.33101	LOC_Os09g35620	1
GO:0021801	cerebral cortex radial glia guided migration	1/1602	1/15655	9.77	0.102332	0.33101	LOC_Os09g35620	1
GO:0021819	layer formation in cerebral cortex	1/1602	1/15655	9.77	0.102332	0.33101	LOC_Os09g35620	1
GO:0021885	forebrain cell migration	1/1602	1/15655	9.77	0.102332	0.33101	LOC_Os09g35620	1
GO:0021953	central nervous system neuron differentiation	1/1602	1/15655	9.77	0.102332	0.33101	LOC_Os09g35620	1
GO:0021987	cerebral cortex development	1/1602	1/15655	9.77	0.102332	0.33101	LOC_Os09g35620	1
GO:0022009	central nervous system vasculogenesis	1/1602	1/15655	9.77	0.102332	0.33101	LOC_Os09g35620	1
GO:0022029	telencephalon cell migration	1/1602	1/15655	9.77	0.102332	0.33101	LOC_Os09g35620	1
GO:0022030	telencephalon glial cell migration	1/1602	1/15655	9.77	0.102332	0.33101	LOC_Os09g35620	1
GO:0022404	molting cycle process	1/1602	1/15655	9.77	0.102332	0.33101	LOC_Os09g35620	1
GO:0022405	hair cycle process	1/1602	1/15655	9.77	0.102332	0.33101	LOC_Os09g35620	1
GO:0030098	lymphocyte differentiation	1/1602	1/15655	9.77	0.102332	0.33101	LOC_Os09g35620	1
GO:0030177	positive regulation of Wnt signaling pathway	1/1602	1/15655	9.77	0.102332	0.33101	LOC_Os09g35620	1
GO:0030216	keratinocyte differentiation	1/1602	1/15655	9.77	0.102332	0.33101	LOC_Os09g35620	1
GO:0030217	T cell differentiation	1/1602	1/15655	9.77	0.102332	0.33101	LOC_Os09g35620	1
GO:0030260	entry into host cell	1/1602	1/15655	9.77	0.102332	0.33101	LOC_Os09g35620	1
GO:0030316	osteoclast differentiation	1/1602	1/15655	9.77	0.102332	0.33101	LOC_Os09g35620	1
GO:0030326	embryonic limb morphogenesis	1/1602	1/15655	9.77	0.102332	0.33101	LOC_Os09g35620	1
GO:0030539	male genitalia development	1/1602	1/15655	9.77	0.102332	0.33101	LOC_Os09g35620	1
GO:0030850	prostate gland development	1/1602	1/15655	9.77	0.102332	0.33101	LOC_Os09g35620	1
GO:0030857	negative regulation of epithelial cell differentiation	1/1602	1/15655	9.77	0.102332	0.33101	LOC_Os09g35620	1
GO:0030900	forebrain development	1/1602	1/15655	9.77	0.102332	0.33101	LOC_Os09g35620	1
GO:0030901	midbrain development	1/1602	1/15655	9.77	0.102332	0.33101	LOC_Os09g35620	1
GO:0031054	pre-miRNA processing	1/1602	1/15655	9.77	0.102332	0.33101	LOC_Os03g63740	1
GO:0031069	hair follicle morphogenesis	1/1602	1/15655	9.77	0.102332	0.33101	LOC_Os09g35620	1
GO:0031128	developmental induction	1/1602	1/15655	9.77	0.102332	0.33101	LOC_Os09g35620	1
GO:0031424	keratinization	1/1602	1/15655	9.77	0.102332	0.33101	LOC_Os09g35620	1
GO:0031589	cell-substrate adhesion	1/1602	1/15655	9.77	0.102332	0.33101	LOC_Os09g35620	1
GO:0031641	regulation of myelination	1/1602	1/15655	9.77	0.102332	0.33101	LOC_Os09g35620	1
GO:0032206	positive regulation of telomere maintenance	1/1602	1/15655	9.77	0.102332	0.33101	LOC_Os09g35620	1
GO:0032212	positive regulation of telomere maintenance via telomerase	1/1602	1/15655	9.77	0.102332	0.33101	LOC_Os09g35620	1
GO:0032330	regulation of chondrocyte differentiation	1/1602	1/15655	9.77	0.102332	0.33101	LOC_Os09g35620	1
GO:0032331	negative regulation of chondrocyte differentiation	1/1602	1/15655	9.77	0.102332	0.33101	LOC_Os09g35620	1
GO:0032355	response to estradiol	1/1602	1/15655	9.77	0.102332	0.33101	LOC_Os09g35620	1
GO:0032481	positive regulation of type I interferon production	1/1602	1/15655	9.77	0.102332	0.33101	LOC_Os09g35620	1
GO:0033002	muscle cell proliferation	1/1602	1/15655	9.77	0.102332	0.33101	LOC_Os09g35620	1
GO:0033077	T cell differentiation in thymus	1/1602	1/15655	9.77	0.102332	0.33101	LOC_Os09g35620	1
GO:0033355	ascorbate glutathione cycle	1/1602	1/15655	9.77	0.102332	0.33101	LOC_Os05g02530	1
GO:0034109	homotypic cell-cell adhesion	1/1602	1/15655	9.77	0.102332	0.33101	LOC_Os09g35620	1
GO:0034113	heterotypic cell-cell adhesion	1/1602	1/15655	9.77	0.102332	0.33101	LOC_Os09g35620	1
GO:0034332	adherens junction organization	1/1602	1/15655	9.77	0.102332	0.33101	LOC_Os09g35620	1
GO:0034333	adherens junction assembly	1/1602	1/15655	9.77	0.102332	0.33101	LOC_Os09g35620	1
GO:0035017	cuticle pattern formation	1/1602	1/15655	9.77	0.102332	0.33101	LOC_Os09g35620	1
GO:0035019	somatic stem cell population maintenance	1/1602	1/15655	9.77	0.102332	0.33101	LOC_Os09g35620	1
GO:0035051	cardiocyte differentiation	1/1602	1/15655	9.77	0.102332	0.33101	LOC_Os09g35620	1
GO:0035108	limb morphogenesis	1/1602	1/15655	9.77	0.102332	0.33101	LOC_Os09g35620	1
GO:0035112	genitalia morphogenesis	1/1602	1/15655	9.77	0.102332	0.33101	LOC_Os09g35620	1
GO:0035113	embryonic appendage morphogenesis	1/1602	1/15655	9.77	0.102332	0.33101	LOC_Os09g35620	1
GO:0035115	embryonic forelimb morphogenesis	1/1602	1/15655	9.77	0.102332	0.33101	LOC_Os09g35620	1
GO:0035116	embryonic hindlimb morphogenesis	1/1602	1/15655	9.77	0.102332	0.33101	LOC_Os09g35620	1
GO:0035136	forelimb morphogenesis	1/1602	1/15655	9.77	0.102332	0.33101	LOC_Os09g35620	1
GO:0035137	hindlimb morphogenesis	1/1602	1/15655	9.77	0.102332	0.33101	LOC_Os09g35620	1
GO:0035146	tube fusion	1/1602	1/15655	9.77	0.102332	0.33101	LOC_Os09g35620	1
GO:0035147	branch fusion, open tracheal system	1/1602	1/15655	9.77	0.102332	0.33101	LOC_Os09g35620	1
GO:0035153	epithelial cell type specification, open tracheal system	1/1602	1/15655	9.77	0.102332	0.33101	LOC_Os09g35620	1
GO:0035293	chitin-based larval cuticle pattern formation	1/1602	1/15655	9.77	0.102332	0.33101	LOC_Os09g35620	1
GO:0035315	hair cell differentiation	1/1602	1/15655	9.77	0.102332	0.33101	LOC_Os09g35620	1
GO:0035561	regulation of chromatin binding	1/1602	1/15655	9.77	0.102332	0.33101	LOC_Os09g35620	1
GO:0035635	entry of bacterium into host cell	1/1602	1/15655	9.77	0.102332	0.33101	LOC_Os09g35620	1
GO:0035886	vascular smooth muscle cell differentiation	1/1602	1/15655	9.77	0.102332	0.33101	LOC_Os09g35620	1
GO:0036022	limb joint morphogenesis	1/1602	1/15655	9.77	0.102332	0.33101	LOC_Os09g35620	1
GO:0036023	embryonic skeletal limb joint morphogenesis	1/1602	1/15655	9.77	0.102332	0.33101	LOC_Os09g35620	1
GO:0036230	granulocyte activation	1/1602	1/15655	9.77	0.102332	0.33101	LOC_Os09g35620	1
GO:0040001	establishment of mitotic spindle localization	1/1602	1/15655	9.77	0.102332	0.33101	LOC_Os09g35620	1
GO:0040003	chitin-based cuticle development	1/1602	1/15655	9.77	0.102332	0.33101	LOC_Os09g35620	1
GO:0040015	negative regulation of multicellular organism growth	1/1602	1/15655	9.77	0.102332	0.33101	LOC_Os06g16300	1
GO:0040019	positive regulation of embryonic development	1/1602	1/15655	9.77	0.102332	0.33101	LOC_Os09g35620	1
GO:0040024	dauer larval development	1/1602	1/15655	9.77	0.102332	0.33101	LOC_Os09g35620	1
GO:0040026	positive regulation of vulval development	1/1602	1/15655	9.77	0.102332	0.33101	LOC_Os09g35620	1
GO:0040028	regulation of vulval development	1/1602	1/15655	9.77	0.102332	0.33101	LOC_Os09g35620	1
GO:0040035	hermaphrodite genitalia development	1/1602	1/15655	9.77	0.102332	0.33101	LOC_Os09g35620	1
GO:0040036	regulation of fibroblast growth factor receptor signaling pathway	1/1602	1/15655	9.77	0.102332	0.33101	LOC_Os09g35620	1
GO:0042048	olfactory behavior	1/1602	1/15655	9.77	0.102332	0.33101	LOC_Os12g16290	1
GO:0042063	gliogenesis	1/1602	1/15655	9.77	0.102332	0.33101	LOC_Os09g35620	1
GO:0042074	cell migration involved in gastrulation	1/1602	1/15655	9.77	0.102332	0.33101	LOC_Os09g35620	1
GO:0042110	T cell activation	1/1602	1/15655	9.77	0.102332	0.33101	LOC_Os09g35620	1
GO:0042119	neutrophil activation	1/1602	1/15655	9.77	0.102332	0.33101	LOC_Os09g35620	1
GO:0042262	DNA protection	1/1602	1/15655	9.77	0.102332	0.33101	LOC_Os04g43550	1
GO:0042303	molting cycle	1/1602	1/15655	9.77	0.102332	0.33101	LOC_Os09g35620	1
GO:0042306	regulation of protein import into nucleus	1/1602	1/15655	9.77	0.102332	0.33101	LOC_Os09g35620	1
GO:0042307	positive regulation of protein import into nucleus	1/1602	1/15655	9.77	0.102332	0.33101	LOC_Os09g35620	1
GO:0042337	cuticle development involved in chitin-based cuticle molting cycle	1/1602	1/15655	9.77	0.102332	0.33101	LOC_Os09g35620	1
GO:0042475	odontogenesis of dentin-containing tooth	1/1602	1/15655	9.77	0.102332	0.33101	LOC_Os09g35620	1
GO:0042476	odontogenesis	1/1602	1/15655	9.77	0.102332	0.33101	LOC_Os09g35620	1
GO:0042633	hair cycle	1/1602	1/15655	9.77	0.102332	0.33101	LOC_Os09g35620	1
GO:0042634	regulation of hair cycle	1/1602	1/15655	9.77	0.102332	0.33101	LOC_Os09g35620	1
GO:0042692	muscle cell differentiation	1/1602	1/15655	9.77	0.102332	0.33101	LOC_Os09g35620	1
GO:0042733	embryonic digit morphogenesis	1/1602	1/15655	9.77	0.102332	0.33101	LOC_Os09g35620	1
GO:0042791	5S class rRNA transcription from RNA polymerase III type 1 promoter	1/1602	1/15655	9.77	0.102332	0.33101	LOC_Os05g49480	1
GO:0043058	regulation of backward locomotion	1/1602	1/15655	9.77	0.102332	0.33101	LOC_Os09g35620	1
GO:0043288	apocarotenoid metabolic process	1/1602	1/15655	9.77	0.102332	0.33101	LOC_Os03g59610	1
GO:0043289	apocarotenoid biosynthetic process	1/1602	1/15655	9.77	0.102332	0.33101	LOC_Os03g59610	1
GO:0043297	apical junction assembly	1/1602	1/15655	9.77	0.102332	0.33101	LOC_Os09g35620	1
GO:0043299	leukocyte degranulation	1/1602	1/15655	9.77	0.102332	0.33101	LOC_Os09g35620	1
GO:0043312	neutrophil degranulation	1/1602	1/15655	9.77	0.102332	0.33101	LOC_Os09g35620	1
GO:0043388	positive regulation of DNA binding	1/1602	1/15655	9.77	0.102332	0.33101	LOC_Os09g35620	1
GO:0043537	negative regulation of blood vessel endothelial cell migration	1/1602	1/15655	9.77	0.102332	0.33101	LOC_Os09g35620	1
GO:0043586	tongue development	1/1602	1/15655	9.77	0.102332	0.33101	LOC_Os09g35620	1
GO:0043587	tongue morphogenesis	1/1602	1/15655	9.77	0.102332	0.33101	LOC_Os09g35620	1
GO:0043588	skin development	1/1602	1/15655	9.77	0.102332	0.33101	LOC_Os09g35620	1
GO:0043693	monoterpene biosynthetic process	1/1602	1/15655	9.77	0.102332	0.33101	LOC_Os02g02930	1
GO:0044057	regulation of system process	1/1602	1/15655	9.77	0.102332	0.33101	LOC_Os09g35620	1
GO:0044333	Wnt signaling pathway involved in digestive tract morphogenesis	1/1602	1/15655	9.77	0.102332	0.33101	LOC_Os09g35620	1
GO:0044334	canonical Wnt signaling pathway involved in positive regulation of epithelial to mesenchymal transition	1/1602	1/15655	9.77	0.102332	0.33101	LOC_Os09g35620	1
GO:0044336	canonical Wnt signaling pathway involved in negative regulation of apoptotic process	1/1602	1/15655	9.77	0.102332	0.33101	LOC_Os09g35620	1
GO:0044340	canonical Wnt signaling pathway involved in regulation of cell proliferation	1/1602	1/15655	9.77	0.102332	0.33101	LOC_Os09g35620	1
GO:0044344	cellular response to fibroblast growth factor stimulus	1/1602	1/15655	9.77	0.102332	0.33101	LOC_Os09g35620	1
GO:0044409	entry into host	1/1602	1/15655	9.77	0.102332	0.33101	LOC_Os09g35620	1
GO:0045137	development of primary sexual characteristics	1/1602	1/15655	9.77	0.102332	0.33101	LOC_Os09g35620	1
GO:0045186	zonula adherens assembly	1/1602	1/15655	9.77	0.102332	0.33101	LOC_Os09g35620	1
GO:0045337	farnesyl diphosphate biosynthetic process	1/1602	1/15655	9.77	0.102332	0.33101	LOC_Os01g50760	1
GO:0045445	myoblast differentiation	1/1602	1/15655	9.77	0.102332	0.33101	LOC_Os09g35620	1
GO:0045446	endothelial cell differentiation	1/1602	1/15655	9.77	0.102332	0.33101	LOC_Os09g35620	1
GO:0045453	bone resorption	1/1602	1/15655	9.77	0.102332	0.33101	LOC_Os09g35620	1
GO:0045601	regulation of endothelial cell differentiation	1/1602	1/15655	9.77	0.102332	0.33101	LOC_Os09g35620	1
GO:0045603	positive regulation of endothelial cell differentiation	1/1602	1/15655	9.77	0.102332	0.33101	LOC_Os09g35620	1
GO:0045682	regulation of epidermis development	1/1602	1/15655	9.77	0.102332	0.33101	LOC_Os09g35620	1
GO:0045685	regulation of glial cell differentiation	1/1602	1/15655	9.77	0.102332	0.33101	LOC_Os09g35620	1
GO:0045686	negative regulation of glial cell differentiation	1/1602	1/15655	9.77	0.102332	0.33101	LOC_Os09g35620	1
GO:0045743	positive regulation of fibroblast growth factor receptor signaling pathway	1/1602	1/15655	9.77	0.102332	0.33101	LOC_Os09g35620	1
GO:0045766	positive regulation of angiogenesis	1/1602	1/15655	9.77	0.102332	0.33101	LOC_Os09g35620	1
GO:0045806	negative regulation of endocytosis	1/1602	1/15655	9.77	0.102332	0.33101	LOC_Os12g08670	1
GO:0045844	positive regulation of striated muscle tissue development	1/1602	1/15655	9.77	0.102332	0.33101	LOC_Os09g35620	1
GO:0045900	negative regulation of translational elongation	1/1602	1/15655	9.77	0.102332	0.33101	LOC_Os03g63950	1
GO:0045903	positive regulation of translational fidelity	1/1602	1/15655	9.77	0.102332	0.33101	LOC_Os07g43510	1
GO:0045976	negative regulation of mitotic cell cycle, embryonic	1/1602	1/15655	9.77	0.102332	0.33101	LOC_Os09g35620	1
GO:0046166	glyceraldehyde-3-phosphate biosynthetic process	1/1602	1/15655	9.77	0.102332	0.33101	LOC_Os01g62420	1
GO:0046530	photoreceptor cell differentiation	1/1602	1/15655	9.77	0.102332	0.33101	LOC_Os09g35620	1
GO:0046661	male sex differentiation	1/1602	1/15655	9.77	0.102332	0.33101	LOC_Os09g35620	1
GO:0046666	retinal cell programmed cell death	1/1602	1/15655	9.77	0.102332	0.33101	LOC_Os09g35620	1
GO:0046667	compound eye retinal cell programmed cell death	1/1602	1/15655	9.77	0.102332	0.33101	LOC_Os09g35620	1
GO:0046824	positive regulation of nucleocytoplasmic transport	1/1602	1/15655	9.77	0.102332	0.33101	LOC_Os09g35620	1
GO:0046838	phosphorylated carbohydrate dephosphorylation	1/1602	1/15655	9.77	0.102332	0.33101	LOC_Os12g02120	1
GO:0046849	bone remodeling	1/1602	1/15655	9.77	0.102332	0.33101	LOC_Os09g35620	1
GO:0046916	cellular transition metal ion homeostasis	1/1602	1/15655	9.77	0.102332	0.33101	LOC_Os09g09930	1
GO:0046928	regulation of neurotransmitter secretion	1/1602	1/15655	9.77	0.102332	0.33101	LOC_Os12g08670	1
GO:0048096	chromatin-mediated maintenance of transcription	1/1602	1/15655	9.77	0.102332	0.33101	LOC_Os09g35620	1
GO:0048145	regulation of fibroblast proliferation	1/1602	1/15655	9.77	0.102332	0.33101	LOC_Os09g35620	1
GO:0048167	regulation of synaptic plasticity	1/1602	1/15655	9.77	0.102332	0.33101	LOC_Os12g08670	1
GO:0048168	regulation of neuronal synaptic plasticity	1/1602	1/15655	9.77	0.102332	0.33101	LOC_Os12g08670	1
GO:0048483	autonomic nervous system development	1/1602	1/15655	9.77	0.102332	0.33101	LOC_Os09g35620	1
GO:0048485	sympathetic nervous system development	1/1602	1/15655	9.77	0.102332	0.33101	LOC_Os09g35620	1
GO:0048489	synaptic vesicle transport	1/1602	1/15655	9.77	0.102332	0.33101	LOC_Os09g35620	1
GO:0048526	imaginal disc-derived wing expansion	1/1602	1/15655	9.77	0.102332	0.33101	LOC_Os09g35620	1
GO:0048538	thymus development	1/1602	1/15655	9.77	0.102332	0.33101	LOC_Os09g35620	1
GO:0048592	eye morphogenesis	1/1602	1/15655	9.77	0.102332	0.33101	LOC_Os09g35620	1
GO:0048593	camera-type eye morphogenesis	1/1602	1/15655	9.77	0.102332	0.33101	LOC_Os09g35620	1
GO:0048617	embryonic foregut morphogenesis	1/1602	1/15655	9.77	0.102332	0.33101	LOC_Os09g35620	1
GO:0048634	regulation of muscle organ development	1/1602	1/15655	9.77	0.102332	0.33101	LOC_Os09g35620	1
GO:0048636	positive regulation of muscle organ development	1/1602	1/15655	9.77	0.102332	0.33101	LOC_Os09g35620	1
GO:0048641	regulation of skeletal muscle tissue development	1/1602	1/15655	9.77	0.102332	0.33101	LOC_Os09g35620	1
GO:0048643	positive regulation of skeletal muscle tissue development	1/1602	1/15655	9.77	0.102332	0.33101	LOC_Os09g35620	1
GO:0048644	muscle organ morphogenesis	1/1602	1/15655	9.77	0.102332	0.33101	LOC_Os09g35620	1
GO:0048704	embryonic skeletal system morphogenesis	1/1602	1/15655	9.77	0.102332	0.33101	LOC_Os09g35620	1
GO:0048705	skeletal system morphogenesis	1/1602	1/15655	9.77	0.102332	0.33101	LOC_Os09g35620	1
GO:0048706	embryonic skeletal system development	1/1602	1/15655	9.77	0.102332	0.33101	LOC_Os09g35620	1
GO:0048713	regulation of oligodendrocyte differentiation	1/1602	1/15655	9.77	0.102332	0.33101	LOC_Os09g35620	1
GO:0048715	negative regulation of oligodendrocyte differentiation	1/1602	1/15655	9.77	0.102332	0.33101	LOC_Os09g35620	1
GO:0048730	epidermis morphogenesis	1/1602	1/15655	9.77	0.102332	0.33101	LOC_Os09g35620	1
GO:0048738	cardiac muscle tissue development	1/1602	1/15655	9.77	0.102332	0.33101	LOC_Os09g35620	1
GO:0048754	branching morphogenesis of an epithelial tube	1/1602	1/15655	9.77	0.102332	0.33101	LOC_Os09g35620	1
GO:0048762	mesenchymal cell differentiation	1/1602	1/15655	9.77	0.102332	0.33101	LOC_Os09g35620	1
GO:0048771	tissue remodeling	1/1602	1/15655	9.77	0.102332	0.33101	LOC_Os09g35620	1
GO:0048806	genitalia development	1/1602	1/15655	9.77	0.102332	0.33101	LOC_Os09g35620	1
GO:0048819	regulation of hair follicle maturation	1/1602	1/15655	9.77	0.102332	0.33101	LOC_Os09g35620	1
GO:0048844	artery morphogenesis	1/1602	1/15655	9.77	0.102332	0.33101	LOC_Os09g35620	1
GO:0048863	stem cell differentiation	1/1602	1/15655	9.77	0.102332	0.33101	LOC_Os09g35620	1
GO:0048864	stem cell development	1/1602	1/15655	9.77	0.102332	0.33101	LOC_Os09g35620	1
GO:0048865	stem cell fate commitment	1/1602	1/15655	9.77	0.102332	0.33101	LOC_Os09g35620	1
GO:0050679	positive regulation of epithelial cell proliferation	1/1602	1/15655	9.77	0.102332	0.33101	LOC_Os09g35620	1
GO:0050769	positive regulation of neurogenesis	1/1602	1/15655	9.77	0.102332	0.33101	LOC_Os09g35620	1
GO:0050804	modulation of chemical synaptic transmission	1/1602	1/15655	9.77	0.102332	0.33101	LOC_Os12g08670	1
GO:0050830	defense response to Gram-positive bacterium	1/1602	1/15655	9.77	0.102332	0.33101	LOC_Os09g35620	1
GO:0050982	detection of mechanical stimulus	1/1602	1/15655	9.77	0.102332	0.33101	LOC_Os09g35620	1
GO:0051014	actin filament severing	1/1602	1/15655	9.77	0.102332	0.33101	LOC_Os05g06110	1
GO:0051099	positive regulation of binding	1/1602	1/15655	9.77	0.102332	0.33101	LOC_Os09g35620	1
GO:0051145	smooth muscle cell differentiation	1/1602	1/15655	9.77	0.102332	0.33101	LOC_Os09g35620	1
GO:0051147	regulation of muscle cell differentiation	1/1602	1/15655	9.77	0.102332	0.33101	LOC_Os09g35620	1
GO:0051149	positive regulation of muscle cell differentiation	1/1602	1/15655	9.77	0.102332	0.33101	LOC_Os09g35620	1
GO:0051211	anisotropic cell growth	1/1602	1/15655	9.77	0.102332	0.33101	LOC_Os06g11990	1
GO:0051293	establishment of spindle localization	1/1602	1/15655	9.77	0.102332	0.33101	LOC_Os09g35620	1
GO:0051294	establishment of spindle orientation	1/1602	1/15655	9.77	0.102332	0.33101	LOC_Os09g35620	1
GO:0051410	detoxification of nitrogen compound	1/1602	1/15655	9.77	0.102332	0.33101	LOC_Os02g42330	1
GO:0051415	interphase microtubule nucleation by interphase microtubule organizing center	1/1602	1/15655	9.77	0.102332	0.33101	LOC_Os04g42330	1
GO:0051588	regulation of neurotransmitter transport	1/1602	1/15655	9.77	0.102332	0.33101	LOC_Os12g08670	1
GO:0051653	spindle localization	1/1602	1/15655	9.77	0.102332	0.33101	LOC_Os09g35620	1
GO:0051782	negative regulation of cell division	1/1602	1/15655	9.77	0.102332	0.33101	LOC_Os09g35620	1
GO:0051797	regulation of hair follicle development	1/1602	1/15655	9.77	0.102332	0.33101	LOC_Os09g35620	1
GO:0051806	entry into cell of other organism involved in symbiotic interaction	1/1602	1/15655	9.77	0.102332	0.33101	LOC_Os09g35620	1
GO:0051828	entry into other organism involved in symbiotic interaction	1/1602	1/15655	9.77	0.102332	0.33101	LOC_Os09g35620	1
GO:0051884	regulation of timing of anagen	1/1602	1/15655	9.77	0.102332	0.33101	LOC_Os09g35620	1
GO:0051962	positive regulation of nervous system development	1/1602	1/15655	9.77	0.102332	0.33101	LOC_Os09g35620	1
GO:0052018	modulation by symbiont of RNA levels in host	1/1602	1/15655	9.77	0.102332	0.33101	LOC_Os03g23050	1
GO:0052249	modulation of RNA levels in other organism involved in symbiotic interaction	1/1602	1/15655	9.77	0.102332	0.33101	LOC_Os03g23050	1
GO:0055008	cardiac muscle tissue morphogenesis	1/1602	1/15655	9.77	0.102332	0.33101	LOC_Os09g35620	1
GO:0055010	ventricular cardiac muscle tissue morphogenesis	1/1602	1/15655	9.77	0.102332	0.33101	LOC_Os09g35620	1
GO:0055017	cardiac muscle tissue growth	1/1602	1/15655	9.77	0.102332	0.33101	LOC_Os09g35620	1
GO:0055117	regulation of cardiac muscle contraction	1/1602	1/15655	9.77	0.102332	0.33101	LOC_Os09g35620	1
GO:0060038	cardiac muscle cell proliferation	1/1602	1/15655	9.77	0.102332	0.33101	LOC_Os09g35620	1
GO:0060066	oviduct development	1/1602	1/15655	9.77	0.102332	0.33101	LOC_Os09g35620	1
GO:0060147	regulation of posttranscriptional gene silencing	1/1602	1/15655	9.77	0.102332	0.33101	LOC_Os12g16290	1
GO:0060173	limb development	1/1602	1/15655	9.77	0.102332	0.33101	LOC_Os09g35620	1
GO:0060232	delamination	1/1602	1/15655	9.77	0.102332	0.33101	LOC_Os09g35620	1
GO:0060272	embryonic skeletal joint morphogenesis	1/1602	1/15655	9.77	0.102332	0.33101	LOC_Os09g35620	1
GO:0060415	muscle tissue morphogenesis	1/1602	1/15655	9.77	0.102332	0.33101	LOC_Os09g35620	1
GO:0060419	heart growth	1/1602	1/15655	9.77	0.102332	0.33101	LOC_Os09g35620	1
GO:0060425	lung morphogenesis	1/1602	1/15655	9.77	0.102332	0.33101	LOC_Os09g35620	1
GO:0060438	trachea development	1/1602	1/15655	9.77	0.102332	0.33101	LOC_Os09g35620	1
GO:0060439	trachea morphogenesis	1/1602	1/15655	9.77	0.102332	0.33101	LOC_Os09g35620	1
GO:0060440	trachea formation	1/1602	1/15655	9.77	0.102332	0.33101	LOC_Os09g35620	1
GO:0060441	epithelial tube branching involved in lung morphogenesis	1/1602	1/15655	9.77	0.102332	0.33101	LOC_Os09g35620	1
GO:0060446	branching involved in open tracheal system development	1/1602	1/15655	9.77	0.102332	0.33101	LOC_Os09g35620	1
GO:0060479	lung cell differentiation	1/1602	1/15655	9.77	0.102332	0.33101	LOC_Os09g35620	1
GO:0060484	lung-associated mesenchyme development	1/1602	1/15655	9.77	0.102332	0.33101	LOC_Os09g35620	1
GO:0060485	mesenchyme development	1/1602	1/15655	9.77	0.102332	0.33101	LOC_Os09g35620	1
GO:0060492	lung induction	1/1602	1/15655	9.77	0.102332	0.33101	LOC_Os09g35620	1
GO:0060537	muscle tissue development	1/1602	1/15655	9.77	0.102332	0.33101	LOC_Os09g35620	1
GO:0060675	ureteric bud morphogenesis	1/1602	1/15655	9.77	0.102332	0.33101	LOC_Os09g35620	1
GO:0060742	epithelial cell differentiation involved in prostate gland development	1/1602	1/15655	9.77	0.102332	0.33101	LOC_Os09g35620	1
GO:0060768	regulation of epithelial cell proliferation involved in prostate gland development	1/1602	1/15655	9.77	0.102332	0.33101	LOC_Os09g35620	1
GO:0060769	positive regulation of epithelial cell proliferation involved in prostate gland development	1/1602	1/15655	9.77	0.102332	0.33101	LOC_Os09g35620	1
GO:0060789	hair follicle placode formation	1/1602	1/15655	9.77	0.102332	0.33101	LOC_Os09g35620	1
GO:0060795	cell fate commitment involved in formation of primary germ layer	1/1602	1/15655	9.77	0.102332	0.33101	LOC_Os09g35620	1
GO:0060840	artery development	1/1602	1/15655	9.77	0.102332	0.33101	LOC_Os09g35620	1
GO:0060856	establishment of blood-brain barrier	1/1602	1/15655	9.77	0.102332	0.33101	LOC_Os09g35620	1
GO:0060914	heart formation	1/1602	1/15655	9.77	0.102332	0.33101	LOC_Os09g35620	1
GO:0060916	mesenchymal cell proliferation involved in lung development	1/1602	1/15655	9.77	0.102332	0.33101	LOC_Os09g35620	1
GO:0060947	cardiac vascular smooth muscle cell differentiation	1/1602	1/15655	9.77	0.102332	0.33101	LOC_Os09g35620	1
GO:0060976	coronary vasculature development	1/1602	1/15655	9.77	0.102332	0.33101	LOC_Os09g35620	1
GO:0060977	coronary vasculature morphogenesis	1/1602	1/15655	9.77	0.102332	0.33101	LOC_Os09g35620	1
GO:0060982	coronary artery morphogenesis	1/1602	1/15655	9.77	0.102332	0.33101	LOC_Os09g35620	1
GO:0060983	epicardium-derived cardiac vascular smooth muscle cell differentiation	1/1602	1/15655	9.77	0.102332	0.33101	LOC_Os09g35620	1
GO:0061028	establishment of endothelial barrier	1/1602	1/15655	9.77	0.102332	0.33101	LOC_Os09g35620	1
GO:0061035	regulation of cartilage development	1/1602	1/15655	9.77	0.102332	0.33101	LOC_Os09g35620	1
GO:0061037	negative regulation of cartilage development	1/1602	1/15655	9.77	0.102332	0.33101	LOC_Os09g35620	1
GO:0061046	regulation of branching involved in lung morphogenesis	1/1602	1/15655	9.77	0.102332	0.33101	LOC_Os09g35620	1
GO:0061047	positive regulation of branching involved in lung morphogenesis	1/1602	1/15655	9.77	0.102332	0.33101	LOC_Os09g35620	1
GO:0061061	muscle structure development	1/1602	1/15655	9.77	0.102332	0.33101	LOC_Os09g35620	1
GO:0061062	regulation of nematode larval development	1/1602	1/15655	9.77	0.102332	0.33101	LOC_Os09g35620	1
GO:0061063	positive regulation of nematode larval development	1/1602	1/15655	9.77	0.102332	0.33101	LOC_Os09g35620	1
GO:0061138	morphogenesis of a branching epithelium	1/1602	1/15655	9.77	0.102332	0.33101	LOC_Os09g35620	1
GO:0061154	endothelial tube morphogenesis	1/1602	1/15655	9.77	0.102332	0.33101	LOC_Os09g35620	1
GO:0061196	fungiform papilla development	1/1602	1/15655	9.77	0.102332	0.33101	LOC_Os09g35620	1
GO:0061197	fungiform papilla morphogenesis	1/1602	1/15655	9.77	0.102332	0.33101	LOC_Os09g35620	1
GO:0061198	fungiform papilla formation	1/1602	1/15655	9.77	0.102332	0.33101	LOC_Os09g35620	1
GO:0061311	cell surface receptor signaling pathway involved in heart development	1/1602	1/15655	9.77	0.102332	0.33101	LOC_Os09g35620	1
GO:0061316	canonical Wnt signaling pathway involved in heart development	1/1602	1/15655	9.77	0.102332	0.33101	LOC_Os09g35620	1
GO:0061324	canonical Wnt signaling pathway involved in positive regulation of cardiac outflow tract cell proliferation	1/1602	1/15655	9.77	0.102332	0.33101	LOC_Os09g35620	1
GO:0061326	renal tubule development	1/1602	1/15655	9.77	0.102332	0.33101	LOC_Os09g35620	1
GO:0061333	renal tubule morphogenesis	1/1602	1/15655	9.77	0.102332	0.33101	LOC_Os09g35620	1
GO:0061337	cardiac conduction	1/1602	1/15655	9.77	0.102332	0.33101	LOC_Os09g35620	1
GO:0061548	ganglion development	1/1602	1/15655	9.77	0.102332	0.33101	LOC_Os09g35620	1
GO:0061549	sympathetic ganglion development	1/1602	1/15655	9.77	0.102332	0.33101	LOC_Os09g35620	1
GO:0061550	cranial ganglion development	1/1602	1/15655	9.77	0.102332	0.33101	LOC_Os09g35620	1
GO:0061866	negative regulation of histone H3-S10 phosphorylation	1/1602	1/15655	9.77	0.102332	0.33101	LOC_Os03g58600	1
GO:0070268	cornification	1/1602	1/15655	9.77	0.102332	0.33101	LOC_Os09g35620	1
GO:0070602	regulation of centromeric sister chromatid cohesion	1/1602	1/15655	9.77	0.102332	0.33101	LOC_Os09g35620	1
GO:0070716	mismatch repair involved in maintenance of fidelity involved in DNA-dependent DNA replication	1/1602	1/15655	9.77	0.102332	0.33101	LOC_Os01g40980	1
GO:0070830	bicellular tight junction assembly	1/1602	1/15655	9.77	0.102332	0.33101	LOC_Os09g35620	1
GO:0070986	left/right axis specification	1/1602	1/15655	9.77	0.102332	0.33101	LOC_Os09g35620	1
GO:0071244	cellular response to carbon dioxide	1/1602	1/15655	9.77	0.102332	0.33101	LOC_Os03g64150	1
GO:0071260	cellular response to mechanical stimulus	1/1602	1/15655	9.77	0.102332	0.33101	LOC_Os09g35620	1
GO:0071285	cellular response to lithium ion	1/1602	1/15655	9.77	0.102332	0.33101	LOC_Os09g35620	1
GO:0071542	dopaminergic neuron differentiation	1/1602	1/15655	9.77	0.102332	0.33101	LOC_Os09g35620	1
GO:0071588	hydrogen peroxide mediated signaling pathway	1/1602	1/15655	9.77	0.102332	0.33101	LOC_Os09g31390	1
GO:0071603	endothelial cell-cell adhesion	1/1602	1/15655	9.77	0.102332	0.33101	LOC_Os09g35620	1
GO:0071680	response to indole-3-methanol	1/1602	1/15655	9.77	0.102332	0.33101	LOC_Os09g35620	1
GO:0071681	cellular response to indole-3-methanol	1/1602	1/15655	9.77	0.102332	0.33101	LOC_Os09g35620	1
GO:0071774	response to fibroblast growth factor	1/1602	1/15655	9.77	0.102332	0.33101	LOC_Os09g35620	1
GO:0071896	protein localization to adherens junction	1/1602	1/15655	9.77	0.102332	0.33101	LOC_Os09g35620	1
GO:0072006	nephron development	1/1602	1/15655	9.77	0.102332	0.33101	LOC_Os09g35620	1
GO:0072009	nephron epithelium development	1/1602	1/15655	9.77	0.102332	0.33101	LOC_Os09g35620	1
GO:0072028	nephron morphogenesis	1/1602	1/15655	9.77	0.102332	0.33101	LOC_Os09g35620	1
GO:0072033	renal vesicle formation	1/1602	1/15655	9.77	0.102332	0.33101	LOC_Os09g35620	1
GO:0072053	renal inner medulla development	1/1602	1/15655	9.77	0.102332	0.33101	LOC_Os09g35620	1
GO:0072054	renal outer medulla development	1/1602	1/15655	9.77	0.102332	0.33101	LOC_Os09g35620	1
GO:0072073	kidney epithelium development	1/1602	1/15655	9.77	0.102332	0.33101	LOC_Os09g35620	1
GO:0072077	renal vesicle morphogenesis	1/1602	1/15655	9.77	0.102332	0.33101	LOC_Os09g35620	1
GO:0072078	nephron tubule morphogenesis	1/1602	1/15655	9.77	0.102332	0.33101	LOC_Os09g35620	1
GO:0072079	nephron tubule formation	1/1602	1/15655	9.77	0.102332	0.33101	LOC_Os09g35620	1
GO:0072080	nephron tubule development	1/1602	1/15655	9.77	0.102332	0.33101	LOC_Os09g35620	1
GO:0072087	renal vesicle development	1/1602	1/15655	9.77	0.102332	0.33101	LOC_Os09g35620	1
GO:0072088	nephron epithelium morphogenesis	1/1602	1/15655	9.77	0.102332	0.33101	LOC_Os09g35620	1
GO:0072091	regulation of stem cell proliferation	1/1602	1/15655	9.77	0.102332	0.33101	LOC_Os09g35620	1
GO:0072132	mesenchyme morphogenesis	1/1602	1/15655	9.77	0.102332	0.33101	LOC_Os09g35620	1
GO:0072163	mesonephric epithelium development	1/1602	1/15655	9.77	0.102332	0.33101	LOC_Os09g35620	1
GO:0072164	mesonephric tubule development	1/1602	1/15655	9.77	0.102332	0.33101	LOC_Os09g35620	1
GO:0072171	mesonephric tubule morphogenesis	1/1602	1/15655	9.77	0.102332	0.33101	LOC_Os09g35620	1
GO:0072182	regulation of nephron tubule epithelial cell differentiation	1/1602	1/15655	9.77	0.102332	0.33101	LOC_Os09g35620	1
GO:0072215	regulation of metanephros development	1/1602	1/15655	9.77	0.102332	0.33101	LOC_Os09g35620	1
GO:0072217	negative regulation of metanephros development	1/1602	1/15655	9.77	0.102332	0.33101	LOC_Os09g35620	1
GO:0072498	embryonic skeletal joint development	1/1602	1/15655	9.77	0.102332	0.33101	LOC_Os09g35620	1
GO:0080021	response to benzoic acid	1/1602	1/15655	9.77	0.102332	0.33101	LOC_Os07g47590	1
GO:0086004	regulation of cardiac muscle cell contraction	1/1602	1/15655	9.77	0.102332	0.33101	LOC_Os09g35620	1
GO:0086042	cardiac muscle cell-cardiac muscle cell adhesion	1/1602	1/15655	9.77	0.102332	0.33101	LOC_Os09g35620	1
GO:0086065	cell communication involved in cardiac conduction	1/1602	1/15655	9.77	0.102332	0.33101	LOC_Os09g35620	1
GO:0086069	bundle of His cell to Purkinje myocyte communication	1/1602	1/15655	9.77	0.102332	0.33101	LOC_Os09g35620	1
GO:0086073	bundle of His cell-Purkinje myocyte adhesion involved in cell communication	1/1602	1/15655	9.77	0.102332	0.33101	LOC_Os09g35620	1
GO:0086091	regulation of heart rate by cardiac conduction	1/1602	1/15655	9.77	0.102332	0.33101	LOC_Os09g35620	1
GO:0090136	epithelial cell-cell adhesion	1/1602	1/15655	9.77	0.102332	0.33101	LOC_Os09g35620	1
GO:0090138	regulation of actin cytoskeleton organization by cell-cell adhesion	1/1602	1/15655	9.77	0.102332	0.33101	LOC_Os09g35620	1
GO:0090183	regulation of kidney development	1/1602	1/15655	9.77	0.102332	0.33101	LOC_Os09g35620	1
GO:0090185	negative regulation of kidney development	1/1602	1/15655	9.77	0.102332	0.33101	LOC_Os09g35620	1
GO:0090254	cell elongation involved in imaginal disc-derived wing morphogenesis	1/1602	1/15655	9.77	0.102332	0.33101	LOC_Os09g35620	1
GO:0090257	regulation of muscle system process	1/1602	1/15655	9.77	0.102332	0.33101	LOC_Os09g35620	1
GO:0090263	positive regulation of canonical Wnt signaling pathway	1/1602	1/15655	9.77	0.102332	0.33101	LOC_Os09g35620	1
GO:0090279	regulation of calcium ion import	1/1602	1/15655	9.77	0.102332	0.33101	LOC_Os09g35620	1
GO:0097479	synaptic vesicle localization	1/1602	1/15655	9.77	0.102332	0.33101	LOC_Os09g35620	1
GO:0097480	establishment of synaptic vesicle localization	1/1602	1/15655	9.77	0.102332	0.33101	LOC_Os09g35620	1
GO:0098609	cell-cell adhesion	1/1602	1/15655	9.77	0.102332	0.33101	LOC_Os09g35620	1
GO:0098773	skin epidermis development	1/1602	1/15655	9.77	0.102332	0.33101	LOC_Os09g35620	1
GO:0098911	regulation of ventricular cardiac muscle cell action potential	1/1602	1/15655	9.77	0.102332	0.33101	LOC_Os09g35620	1
GO:0098916	anterograde trans-synaptic signaling	1/1602	1/15655	9.77	0.102332	0.33101	LOC_Os09g35620	1
GO:0099003	vesicle-mediated transport in synapse	1/1602	1/15655	9.77	0.102332	0.33101	LOC_Os09g35620	1
GO:0099536	synaptic signaling	1/1602	1/15655	9.77	0.102332	0.33101	LOC_Os09g35620	1
GO:0099537	trans-synaptic signaling	1/1602	1/15655	9.77	0.102332	0.33101	LOC_Os09g35620	1
GO:1900368	regulation of RNA interference	1/1602	1/15655	9.77	0.102332	0.33101	LOC_Os12g16290	1
GO:1900408	negative regulation of cellular response to oxidative stress	1/1602	1/15655	9.77	0.102332	0.33101	LOC_Os09g35620	1
GO:1901343	negative regulation of vasculature development	1/1602	1/15655	9.77	0.102332	0.33101	LOC_Os09g35620	1
GO:1901695	tyramine biosynthetic process	1/1602	1/15655	9.77	0.102332	0.33101	LOC_Os01g56380	1
GO:1901861	regulation of muscle tissue development	1/1602	1/15655	9.77	0.102332	0.33101	LOC_Os09g35620	1
GO:1901863	positive regulation of muscle tissue development	1/1602	1/15655	9.77	0.102332	0.33101	LOC_Os09g35620	1
GO:1901963	regulation of cell proliferation involved in outflow tract morphogenesis	1/1602	1/15655	9.77	0.102332	0.33101	LOC_Os09g35620	1
GO:1902184	negative regulation of shoot apical meristem development	1/1602	1/15655	9.77	0.102332	0.33101	LOC_Os07g22534	1
GO:1902414	protein localization to cell junction	1/1602	1/15655	9.77	0.102332	0.33101	LOC_Os09g35620	1
GO:1902456	regulation of stomatal opening	1/1602	1/15655	9.77	0.102332	0.33101	LOC_Os03g64150	1
GO:1902644	tertiary alcohol metabolic process	1/1602	1/15655	9.77	0.102332	0.33101	LOC_Os03g59610	1
GO:1902645	tertiary alcohol biosynthetic process	1/1602	1/15655	9.77	0.102332	0.33101	LOC_Os03g59610	1
GO:1902692	regulation of neuroblast proliferation	1/1602	1/15655	9.77	0.102332	0.33101	LOC_Os09g35620	1
GO:1902730	positive regulation of proteoglycan biosynthetic process	1/1602	1/15655	9.77	0.102332	0.33101	LOC_Os09g35620	1
GO:1902930	regulation of alcohol biosynthetic process	1/1602	1/15655	9.77	0.102332	0.33101	LOC_Os03g59610	1
GO:1903018	regulation of glycoprotein metabolic process	1/1602	1/15655	9.77	0.102332	0.33101	LOC_Os09g35620	1
GO:1903020	positive regulation of glycoprotein metabolic process	1/1602	1/15655	9.77	0.102332	0.33101	LOC_Os09g35620	1
GO:1903115	regulation of actin filament-based movement	1/1602	1/15655	9.77	0.102332	0.33101	LOC_Os09g35620	1
GO:1903202	negative regulation of oxidative stress-induced cell death	1/1602	1/15655	9.77	0.102332	0.33101	LOC_Os09g35620	1
GO:1903204	negative regulation of oxidative stress-induced neuron death	1/1602	1/15655	9.77	0.102332	0.33101	LOC_Os09g35620	1
GO:1903343	positive regulation of meiotic DNA double-strand break formation	1/1602	1/15655	9.77	0.102332	0.33101	LOC_Os03g58600	1
GO:1903354	regulation of distal tip cell migration	1/1602	1/15655	9.77	0.102332	0.33101	LOC_Os09g35620	1
GO:1903356	positive regulation of distal tip cell migration	1/1602	1/15655	9.77	0.102332	0.33101	LOC_Os09g35620	1
GO:1903522	regulation of blood circulation	1/1602	1/15655	9.77	0.102332	0.33101	LOC_Os09g35620	1
GO:1904018	positive regulation of vasculature development	1/1602	1/15655	9.77	0.102332	0.33101	LOC_Os09g35620	1
GO:1904173	regulation of histone demethylase activity (H3-K4 specific)	1/1602	1/15655	9.77	0.102332	0.33101	LOC_Os09g35620	1
GO:1904356	regulation of telomere maintenance via telomere lengthening	1/1602	1/15655	9.77	0.102332	0.33101	LOC_Os09g35620	1
GO:1904358	positive regulation of telomere maintenance via telomere lengthening	1/1602	1/15655	9.77	0.102332	0.33101	LOC_Os09g35620	1
GO:1904499	regulation of chromatin-mediated maintenance of transcription	1/1602	1/15655	9.77	0.102332	0.33101	LOC_Os09g35620	1
GO:1904501	positive regulation of chromatin-mediated maintenance of transcription	1/1602	1/15655	9.77	0.102332	0.33101	LOC_Os09g35620	1
GO:1904589	regulation of protein import	1/1602	1/15655	9.77	0.102332	0.33101	LOC_Os09g35620	1
GO:1904591	positive regulation of protein import	1/1602	1/15655	9.77	0.102332	0.33101	LOC_Os09g35620	1
GO:1904793	regulation of euchromatin binding	1/1602	1/15655	9.77	0.102332	0.33101	LOC_Os09g35620	1
GO:1904796	regulation of core promoter binding	1/1602	1/15655	9.77	0.102332	0.33101	LOC_Os09g35620	1
GO:1904798	positive regulation of core promoter binding	1/1602	1/15655	9.77	0.102332	0.33101	LOC_Os09g35620	1
GO:1904837	beta-catenin-TCF complex assembly	1/1602	1/15655	9.77	0.102332	0.33101	LOC_Os09g35620	1
GO:1904886	beta-catenin destruction complex disassembly	1/1602	1/15655	9.77	0.102332	0.33101	LOC_Os09g35620	1
GO:1904888	cranial skeletal system development	1/1602	1/15655	9.77	0.102332	0.33101	LOC_Os09g35620	1
GO:1904948	midbrain dopaminergic neuron differentiation	1/1602	1/15655	9.77	0.102332	0.33101	LOC_Os09g35620	1
GO:1904953	Wnt signaling pathway involved in midbrain dopaminergic neuron differentiation	1/1602	1/15655	9.77	0.102332	0.33101	LOC_Os09g35620	1
GO:1904954	canonical Wnt signaling pathway involved in midbrain dopaminergic neuron differentiation	1/1602	1/15655	9.77	0.102332	0.33101	LOC_Os09g35620	1
GO:1905331	negative regulation of morphogenesis of an epithelium	1/1602	1/15655	9.77	0.102332	0.33101	LOC_Os09g35620	1
GO:1905332	positive regulation of morphogenesis of an epithelium	1/1602	1/15655	9.77	0.102332	0.33101	LOC_Os09g35620	1
GO:1905642	negative regulation of DNA methylation	1/1602	1/15655	9.77	0.102332	0.33101	LOC_Os01g42460	1
GO:1905775	negative regulation of DNA helicase activity	1/1602	1/15655	9.77	0.102332	0.33101	LOC_Os11g29380	1
GO:1990138	neuron projection extension	1/1602	1/15655	9.77	0.102332	0.33101	LOC_Os09g35620	1
GO:1990258	histone glutamine methylation	1/1602	1/15655	9.77	0.102332	0.33101	LOC_Os05g08360	1
GO:1990314	cellular response to insulin-like growth factor stimulus	1/1602	1/15655	9.77	0.102332	0.33101	LOC_Os09g35620	1
GO:1990403	embryonic brain development	1/1602	1/15655	9.77	0.102332	0.33101	LOC_Os09g35620	1
GO:1990791	dorsal root ganglion development	1/1602	1/15655	9.77	0.102332	0.33101	LOC_Os09g35620	1
GO:2000015	regulation of determination of dorsal identity	1/1602	1/15655	9.77	0.102332	0.33101	LOC_Os09g35620	1
GO:2000017	positive regulation of determination of dorsal identity	1/1602	1/15655	9.77	0.102332	0.33101	LOC_Os09g35620	1
GO:2000136	regulation of cell proliferation involved in heart morphogenesis	1/1602	1/15655	9.77	0.102332	0.33101	LOC_Os09g35620	1
GO:2000144	positive regulation of DNA-templated transcription, initiation	1/1602	1/15655	9.77	0.102332	0.33101	LOC_Os09g35620	1
GO:2000177	regulation of neural precursor cell proliferation	1/1602	1/15655	9.77	0.102332	0.33101	LOC_Os09g35620	1
GO:2000179	positive regulation of neural precursor cell proliferation	1/1602	1/15655	9.77	0.102332	0.33101	LOC_Os09g35620	1
GO:2000181	negative regulation of blood vessel morphogenesis	1/1602	1/15655	9.77	0.102332	0.33101	LOC_Os09g35620	1
GO:2000185	regulation of phosphate transmembrane transport	1/1602	1/15655	9.77	0.102332	0.33101	LOC_Os05g48390	1
GO:2000648	positive regulation of stem cell proliferation	1/1602	1/15655	9.77	0.102332	0.33101	LOC_Os09g35620	1
GO:2000679	positive regulation of transcription regulatory region DNA binding	1/1602	1/15655	9.77	0.102332	0.33101	LOC_Os09g35620	1
GO:2000696	regulation of epithelial cell differentiation involved in kidney development	1/1602	1/15655	9.77	0.102332	0.33101	LOC_Os09g35620	1
GO:2000697	negative regulation of epithelial cell differentiation involved in kidney development	1/1602	1/15655	9.77	0.102332	0.33101	LOC_Os09g35620	1
GO:2000826	regulation of heart morphogenesis	1/1602	1/15655	9.77	0.102332	0.33101	LOC_Os09g35620	1
GO:0000395	mRNA 5'-splice site recognition	1/1602	2/15655	4.89	0.194197	0.424026	LOC_Os02g16640	1
GO:0000453	enzyme-directed rRNA 2'-O-methylation	1/1602	2/15655	4.89	0.194197	0.424026	LOC_Os10g25300	1
GO:0000730	DNA recombinase assembly	1/1602	2/15655	4.89	0.194197	0.424026	LOC_Os11g40150	1
GO:0001525	angiogenesis	1/1602	2/15655	4.89	0.194197	0.424026	LOC_Os09g35620	1
GO:0001570	vasculogenesis	1/1602	2/15655	4.89	0.194197	0.424026	LOC_Os09g35620	1
GO:0001676	long-chain fatty acid metabolic process	1/1602	2/15655	4.89	0.194197	0.424026	LOC_Os11g39220	1
GO:0001701	in utero embryonic development	1/1602	2/15655	4.89	0.194197	0.424026	LOC_Os09g35620	1
GO:0001704	formation of primary germ layer	1/1602	2/15655	4.89	0.194197	0.424026	LOC_Os09g35620	1
GO:0001706	endoderm formation	1/1602	2/15655	4.89	0.194197	0.424026	LOC_Os09g35620	1
GO:0001894	tissue homeostasis	1/1602	2/15655	4.89	0.194197	0.424026	LOC_Os09g35620	1
GO:0002164	larval development	1/1602	2/15655	4.89	0.194197	0.424026	LOC_Os09g35620	1
GO:0002168	instar larval development	1/1602	2/15655	4.89	0.194197	0.424026	LOC_Os09g35620	1
GO:0002200	somatic diversification of immune receptors	1/1602	2/15655	4.89	0.194197	0.424026	LOC_Os01g67850	1
GO:0002204	somatic recombination of immunoglobulin genes involved in immune response	1/1602	2/15655	4.89	0.194197	0.424026	LOC_Os01g67850	1
GO:0002208	somatic diversification of immunoglobulins involved in immune response	1/1602	2/15655	4.89	0.194197	0.424026	LOC_Os01g67850	1
GO:0002250	adaptive immune response	1/1602	2/15655	4.89	0.194197	0.424026	LOC_Os01g67850	1
GO:0002285	lymphocyte activation involved in immune response	1/1602	2/15655	4.89	0.194197	0.424026	LOC_Os01g67850	1
GO:0002312	B cell activation involved in immune response	1/1602	2/15655	4.89	0.194197	0.424026	LOC_Os01g67850	1
GO:0002377	immunoglobulin production	1/1602	2/15655	4.89	0.194197	0.424026	LOC_Os01g67850	1
GO:0002381	immunoglobulin production involved in immunoglobulin mediated immune response	1/1602	2/15655	4.89	0.194197	0.424026	LOC_Os01g67850	1
GO:0002440	production of molecular mediator of immune response	1/1602	2/15655	4.89	0.194197	0.424026	LOC_Os01g67850	1
GO:0002449	lymphocyte mediated immunity	1/1602	2/15655	4.89	0.194197	0.424026	LOC_Os01g67850	1
GO:0002460	adaptive immune response based on somatic recombination of immune receptors built from immunoglobulin superfamily domains	1/1602	2/15655	4.89	0.194197	0.424026	LOC_Os01g67850	1
GO:0002562	somatic diversification of immune receptors via germline recombination within a single locus	1/1602	2/15655	4.89	0.194197	0.424026	LOC_Os01g67850	1
GO:0002694	regulation of leukocyte activation	1/1602	2/15655	4.89	0.194197	0.424026	LOC_Os09g35620	1
GO:0002758	innate immune response-activating signal transduction	1/1602	2/15655	4.89	0.194197	0.424026	LOC_Os04g31030	1
GO:0002761	regulation of myeloid leukocyte differentiation	1/1602	2/15655	4.89	0.194197	0.424026	LOC_Os09g35620	1
GO:0002762	negative regulation of myeloid leukocyte differentiation	1/1602	2/15655	4.89	0.194197	0.424026	LOC_Os09g35620	1
GO:0002791	regulation of peptide secretion	1/1602	2/15655	4.89	0.194197	0.424026	LOC_Os04g47700	1
GO:0003205	cardiac chamber development	1/1602	2/15655	4.89	0.194197	0.424026	LOC_Os09g35620	1
GO:0006210	thymine catabolic process	1/1602	2/15655	4.89	0.194197	0.424026	LOC_Os07g09060	1
GO:0006218	uridine catabolic process	1/1602	2/15655	4.89	0.194197	0.424026	LOC_Os09g39440	1
GO:0006574	valine catabolic process	1/1602	2/15655	4.89	0.194197	0.424026	LOC_Os07g09060	1
GO:0006637	acyl-CoA metabolic process	1/1602	2/15655	4.89	0.194197	0.424026	LOC_Os04g47120	1
GO:0006657	CDP-choline pathway	1/1602	2/15655	4.89	0.194197	0.424026	LOC_Os01g08760	1
GO:0006714	sesquiterpenoid metabolic process	1/1602	2/15655	4.89	0.194197	0.424026	LOC_Os03g59610	1
GO:0006788	heme oxidation	1/1602	2/15655	4.89	0.194197	0.424026	LOC_Os03g27770	1
GO:0006829	zinc II ion transport	1/1602	2/15655	4.89	0.194197	0.424026	LOC_Os01g74110	1
GO:0007063	regulation of sister chromatid cohesion	1/1602	2/15655	4.89	0.194197	0.424026	LOC_Os09g35620	1
GO:0007095	mitotic G2 DNA damage checkpoint	1/1602	2/15655	4.89	0.194197	0.424026	LOC_Os11g08660	1
GO:0007098	centrosome cycle	1/1602	2/15655	4.89	0.194197	0.424026	LOC_Os09g35620	1
GO:0007265	Ras protein signal transduction	1/1602	2/15655	4.89	0.194197	0.424026	LOC_Os09g35620	1
GO:0007286	spermatid development	1/1602	2/15655	4.89	0.194197	0.424026	LOC_Os01g67850	1
GO:0007350	blastoderm segmentation	1/1602	2/15655	4.89	0.194197	0.424026	LOC_Os09g35620	1
GO:0007398	ectoderm development	1/1602	2/15655	4.89	0.194197	0.424026	LOC_Os09g35620	1
GO:0007444	imaginal disc development	1/1602	2/15655	4.89	0.194197	0.424026	LOC_Os09g35620	1
GO:0007472	wing disc morphogenesis	1/1602	2/15655	4.89	0.194197	0.424026	LOC_Os09g35620	1
GO:0007476	imaginal disc-derived wing morphogenesis	1/1602	2/15655	4.89	0.194197	0.424026	LOC_Os09g35620	1
GO:0007492	endoderm development	1/1602	2/15655	4.89	0.194197	0.424026	LOC_Os09g35620	1
GO:0007552	metamorphosis	1/1602	2/15655	4.89	0.194197	0.424026	LOC_Os09g35620	1
GO:0007560	imaginal disc morphogenesis	1/1602	2/15655	4.89	0.194197	0.424026	LOC_Os09g35620	1
GO:0007613	memory	1/1602	2/15655	4.89	0.194197	0.424026	LOC_Os09g35620	1
GO:0007616	long-term memory	1/1602	2/15655	4.89	0.194197	0.424026	LOC_Os09g35620	1
GO:0009064	glutamine family amino acid metabolic process	1/1602	2/15655	4.89	0.194197	0.424026	LOC_Os03g59610	1
GO:0009084	glutamine family amino acid biosynthetic process	1/1602	2/15655	4.89	0.194197	0.424026	LOC_Os03g59610	1
GO:0009095	aromatic amino acid family biosynthetic process, prephenate pathway	1/1602	2/15655	4.89	0.194197	0.424026	LOC_Os01g65090	1
GO:0009143	nucleoside triphosphate catabolic process	1/1602	2/15655	4.89	0.194197	0.424026	LOC_Os04g27950	1
GO:0009164	nucleoside catabolic process	1/1602	2/15655	4.89	0.194197	0.424026	LOC_Os09g39440	1
GO:0009440	cyanate catabolic process	1/1602	2/15655	4.89	0.194197	0.424026	LOC_Os01g45274	1
GO:0009452	7-methylguanosine RNA capping	1/1602	2/15655	4.89	0.194197	0.424026	LOC_Os03g27930	1
GO:0009688	abscisic acid biosynthetic process	1/1602	2/15655	4.89	0.194197	0.424026	LOC_Os03g59610	1
GO:0009729	detection of brassinosteroid stimulus	1/1602	2/15655	4.89	0.194197	0.424026	LOC_Os08g07760	1
GO:0009808	lignin metabolic process	1/1602	2/15655	4.89	0.194197	0.424026	LOC_Os02g26770	1
GO:0009948	anterior/posterior axis specification	1/1602	2/15655	4.89	0.194197	0.424026	LOC_Os09g35620	1
GO:0009952	anterior/posterior pattern specification	1/1602	2/15655	4.89	0.194197	0.424026	LOC_Os09g35620	1
GO:0009953	dorsal/ventral pattern formation	1/1602	2/15655	4.89	0.194197	0.424026	LOC_Os09g35620	1
GO:0010024	phytochromobilin biosynthetic process	1/1602	2/15655	4.89	0.194197	0.424026	LOC_Os03g27770	1
GO:0010088	phloem development	1/1602	2/15655	4.89	0.194197	0.424026	LOC_Os04g51130	1
GO:0010258	NADH dehydrogenase complex (plastoquinone) assembly	1/1602	2/15655	4.89	0.194197	0.424026	LOC_Os01g72950	1
GO:0010337	regulation of salicylic acid metabolic process	1/1602	2/15655	4.89	0.194197	0.424026	LOC_Os07g47590	1
GO:0010453	regulation of cell fate commitment	1/1602	2/15655	4.89	0.194197	0.424026	LOC_Os09g35620	1
GO:0010623	programmed cell death involved in cell development	1/1602	2/15655	4.89	0.194197	0.424026	LOC_Os09g35620	1
GO:0014013	regulation of gliogenesis	1/1602	2/15655	4.89	0.194197	0.424026	LOC_Os09g35620	1
GO:0014014	negative regulation of gliogenesis	1/1602	2/15655	4.89	0.194197	0.424026	LOC_Os09g35620	1
GO:0015976	carbon utilization	1/1602	2/15655	4.89	0.194197	0.424026	LOC_Os01g45274	1
GO:0016055	Wnt signaling pathway	1/1602	2/15655	4.89	0.194197	0.424026	LOC_Os09g35620	1
GO:0016064	immunoglobulin mediated immune response	1/1602	2/15655	4.89	0.194197	0.424026	LOC_Os01g67850	1
GO:0016106	sesquiterpenoid biosynthetic process	1/1602	2/15655	4.89	0.194197	0.424026	LOC_Os03g59610	1
GO:0016445	somatic diversification of immunoglobulins	1/1602	2/15655	4.89	0.194197	0.424026	LOC_Os01g67850	1
GO:0016447	somatic recombination of immunoglobulin gene segments	1/1602	2/15655	4.89	0.194197	0.424026	LOC_Os01g67850	1
GO:0017121	phospholipid scrambling	1/1602	2/15655	4.89	0.194197	0.424026	LOC_Os02g14290	1
GO:0018973	trinitrotoluene metabolic process	1/1602	2/15655	4.89	0.194197	0.424026	LOC_Os03g57200	1
GO:0018974	2,4,6-trinitrotoluene metabolic process	1/1602	2/15655	4.89	0.194197	0.424026	LOC_Os03g57200	1
GO:0019318	hexose metabolic process	1/1602	2/15655	4.89	0.194197	0.424026	LOC_Os04g38540	1
GO:0019326	nitrotoluene metabolic process	1/1602	2/15655	4.89	0.194197	0.424026	LOC_Os03g57200	1
GO:0019563	glycerol catabolic process	1/1602	2/15655	4.89	0.194197	0.424026	LOC_Os01g62420	1
GO:0019724	B cell mediated immunity	1/1602	2/15655	4.89	0.194197	0.424026	LOC_Os01g67850	1
GO:0022408	negative regulation of cell-cell adhesion	1/1602	2/15655	4.89	0.194197	0.424026	LOC_Os09g35620	1
GO:0022610	biological adhesion	1/1602	2/15655	4.89	0.194197	0.424026	LOC_Os09g35620	1
GO:0030007	cellular potassium ion homeostasis	1/1602	2/15655	4.89	0.194197	0.424026	LOC_Os03g54100	1
GO:0030010	establishment of cell polarity	1/1602	2/15655	4.89	0.194197	0.424026	LOC_Os09g35620	1
GO:0030099	myeloid cell differentiation	1/1602	2/15655	4.89	0.194197	0.424026	LOC_Os09g35620	1
GO:0030278	regulation of ossification	1/1602	2/15655	4.89	0.194197	0.424026	LOC_Os09g35620	1
GO:0030335	positive regulation of cell migration	1/1602	2/15655	4.89	0.194197	0.424026	LOC_Os09g35620	1
GO:0030856	regulation of epithelial cell differentiation	1/1602	2/15655	4.89	0.194197	0.424026	LOC_Os09g35620	1
GO:0030858	positive regulation of epithelial cell differentiation	1/1602	2/15655	4.89	0.194197	0.424026	LOC_Os09g35620	1
GO:0030997	regulation of centriole-centriole cohesion	1/1602	2/15655	4.89	0.194197	0.424026	LOC_Os09g35620	1
GO:0031053	primary miRNA processing	1/1602	2/15655	4.89	0.194197	0.424026	LOC_Os03g63740	1
GO:0032210	regulation of telomere maintenance via telomerase	1/1602	2/15655	4.89	0.194197	0.424026	LOC_Os09g35620	1
GO:0032785	negative regulation of DNA-templated transcription, elongation	1/1602	2/15655	4.89	0.194197	0.424026	LOC_Os01g67850	1
GO:0032944	regulation of mononuclear cell proliferation	1/1602	2/15655	4.89	0.194197	0.424026	LOC_Os09g35620	1
GO:0033108	mitochondrial respiratory chain complex assembly	1/1602	2/15655	4.89	0.194197	0.424026	LOC_Os04g08340	1
GO:0033234	negative regulation of protein sumoylation	1/1602	2/15655	4.89	0.194197	0.424026	LOC_Os09g35620	1
GO:0033517	myo-inositol hexakisphosphate metabolic process	1/1602	2/15655	4.89	0.194197	0.424026	LOC_Os02g57400	1
GO:0033522	histone H2A ubiquitination	1/1602	2/15655	4.89	0.194197	0.424026	LOC_Os01g67850	1
GO:0033540	fatty acid beta-oxidation using acyl-CoA oxidase	1/1602	2/15655	4.89	0.194197	0.424026	LOC_Os11g39220	1
GO:0033614	chloroplast proton-transporting ATP synthase complex assembly	1/1602	2/15655	4.89	0.194197	0.424026	LOC_Os01g48300	1
GO:0034219	carbohydrate transmembrane transport	1/1602	2/15655	4.89	0.194197	0.424026	LOC_Os01g42090	1
GO:0034243	regulation of transcription elongation from RNA polymerase II promoter	1/1602	2/15655	4.89	0.194197	0.424026	LOC_Os01g67850	1
GO:0034244	negative regulation of transcription elongation from RNA polymerase II promoter	1/1602	2/15655	4.89	0.194197	0.424026	LOC_Os01g67850	1
GO:0034656	nucleobase-containing small molecule catabolic process	1/1602	2/15655	4.89	0.194197	0.424026	LOC_Os09g39440	1
GO:0035107	appendage morphogenesis	1/1602	2/15655	4.89	0.194197	0.424026	LOC_Os09g35620	1
GO:0035114	imaginal disc-derived appendage morphogenesis	1/1602	2/15655	4.89	0.194197	0.424026	LOC_Os09g35620	1
GO:0035120	post-embryonic appendage morphogenesis	1/1602	2/15655	4.89	0.194197	0.424026	LOC_Os09g35620	1
GO:0035220	wing disc development	1/1602	2/15655	4.89	0.194197	0.424026	LOC_Os09g35620	1
GO:0035282	segmentation	1/1602	2/15655	4.89	0.194197	0.424026	LOC_Os09g35620	1
GO:0035567	non-canonical Wnt signaling pathway	1/1602	2/15655	4.89	0.194197	0.424026	LOC_Os09g35620	1
GO:0035627	ceramide transport	1/1602	2/15655	4.89	0.194197	0.424026	LOC_Os03g50280	1
GO:0035973	aggrephagy	1/1602	2/15655	4.89	0.194197	0.424026	LOC_Os03g03920	1
GO:0035987	endodermal cell differentiation	1/1602	2/15655	4.89	0.194197	0.424026	LOC_Os09g35620	1
GO:0036294	cellular response to decreased oxygen levels	1/1602	2/15655	4.89	0.194197	0.424026	LOC_Os03g03920	1
GO:0042113	B cell activation	1/1602	2/15655	4.89	0.194197	0.424026	LOC_Os01g67850	1
GO:0042129	regulation of T cell proliferation	1/1602	2/15655	4.89	0.194197	0.424026	LOC_Os09g35620	1
GO:0042183	formate catabolic process	1/1602	2/15655	4.89	0.194197	0.424026	LOC_Os06g29220	1
GO:0042278	purine nucleoside metabolic process	1/1602	2/15655	4.89	0.194197	0.424026	LOC_Os09g39440	1
GO:0042304	regulation of fatty acid biosynthetic process	1/1602	2/15655	4.89	0.194197	0.424026	LOC_Os05g04220	1
GO:0042454	ribonucleoside catabolic process	1/1602	2/15655	4.89	0.194197	0.424026	LOC_Os09g39440	1
GO:0042659	regulation of cell fate specification	1/1602	2/15655	4.89	0.194197	0.424026	LOC_Os09g35620	1
GO:0043007	maintenance of rDNA	1/1602	2/15655	4.89	0.194197	0.424026	LOC_Os01g40980	1
GO:0043010	camera-type eye development	1/1602	2/15655	4.89	0.194197	0.424026	LOC_Os09g35620	1
GO:0043048	dolichyl monophosphate biosynthetic process	1/1602	2/15655	4.89	0.194197	0.424026	LOC_Os02g05400	1
GO:0043122	regulation of I-kappaB kinase/NF-kappaB signaling	1/1602	2/15655	4.89	0.194197	0.424026	LOC_Os09g35620	1
GO:0043123	positive regulation of I-kappaB kinase/NF-kappaB signaling	1/1602	2/15655	4.89	0.194197	0.424026	LOC_Os09g35620	1
GO:0043525	positive regulation of neuron apoptotic process	1/1602	2/15655	4.89	0.194197	0.424026	LOC_Os09g35620	1
GO:0043535	regulation of blood vessel endothelial cell migration	1/1602	2/15655	4.89	0.194197	0.424026	LOC_Os09g35620	1
GO:0043627	response to estrogen	1/1602	2/15655	4.89	0.194197	0.424026	LOC_Os09g35620	1
GO:0043647	inositol phosphate metabolic process	1/1602	2/15655	4.89	0.194197	0.424026	LOC_Os02g57400	1
GO:0044003	modification by symbiont of host morphology or physiology	1/1602	2/15655	4.89	0.194197	0.424026	LOC_Os03g23050	1
GO:0045190	isotype switching	1/1602	2/15655	4.89	0.194197	0.424026	LOC_Os01g67850	1
GO:0045637	regulation of myeloid cell differentiation	1/1602	2/15655	4.89	0.194197	0.424026	LOC_Os09g35620	1
GO:0045638	negative regulation of myeloid cell differentiation	1/1602	2/15655	4.89	0.194197	0.424026	LOC_Os09g35620	1
GO:0045667	regulation of osteoblast differentiation	1/1602	2/15655	4.89	0.194197	0.424026	LOC_Os09g35620	1
GO:0045669	positive regulation of osteoblast differentiation	1/1602	2/15655	4.89	0.194197	0.424026	LOC_Os09g35620	1
GO:0045670	regulation of osteoclast differentiation	1/1602	2/15655	4.89	0.194197	0.424026	LOC_Os09g35620	1
GO:0045671	negative regulation of osteoclast differentiation	1/1602	2/15655	4.89	0.194197	0.424026	LOC_Os09g35620	1
GO:0045765	regulation of angiogenesis	1/1602	2/15655	4.89	0.194197	0.424026	LOC_Os09g35620	1
GO:0045778	positive regulation of ossification	1/1602	2/15655	4.89	0.194197	0.424026	LOC_Os09g35620	1
GO:0045921	positive regulation of exocytosis	1/1602	2/15655	4.89	0.194197	0.424026	LOC_Os04g47700	1
GO:0045992	negative regulation of embryonic development	1/1602	2/15655	4.89	0.194197	0.424026	LOC_Os09g35620	1
GO:0046108	uridine metabolic process	1/1602	2/15655	4.89	0.194197	0.424026	LOC_Os09g39440	1
GO:0046133	pyrimidine ribonucleoside catabolic process	1/1602	2/15655	4.89	0.194197	0.424026	LOC_Os09g39440	1
GO:0046135	pyrimidine nucleoside catabolic process	1/1602	2/15655	4.89	0.194197	0.424026	LOC_Os09g39440	1
GO:0046256	2,4,6-trinitrotoluene catabolic process	1/1602	2/15655	4.89	0.194197	0.424026	LOC_Os03g57200	1
GO:0046260	trinitrotoluene catabolic process	1/1602	2/15655	4.89	0.194197	0.424026	LOC_Os03g57200	1
GO:0046263	nitrotoluene catabolic process	1/1602	2/15655	4.89	0.194197	0.424026	LOC_Os03g57200	1
GO:0046337	phosphatidylethanolamine metabolic process	1/1602	2/15655	4.89	0.194197	0.424026	LOC_Os01g08760	1
GO:0046605	regulation of centrosome cycle	1/1602	2/15655	4.89	0.194197	0.424026	LOC_Os09g35620	1
GO:0046822	regulation of nucleocytoplasmic transport	1/1602	2/15655	4.89	0.194197	0.424026	LOC_Os09g35620	1
GO:0048515	spermatid differentiation	1/1602	2/15655	4.89	0.194197	0.424026	LOC_Os01g67850	1
GO:0048563	post-embryonic animal organ morphogenesis	1/1602	2/15655	4.89	0.194197	0.424026	LOC_Os09g35620	1
GO:0048569	post-embryonic animal organ development	1/1602	2/15655	4.89	0.194197	0.424026	LOC_Os09g35620	1
GO:0048645	animal organ formation	1/1602	2/15655	4.89	0.194197	0.424026	LOC_Os09g35620	1
GO:0048660	regulation of smooth muscle cell proliferation	1/1602	2/15655	4.89	0.194197	0.424026	LOC_Os09g35620	1
GO:0048707	instar larval or pupal morphogenesis	1/1602	2/15655	4.89	0.194197	0.424026	LOC_Os09g35620	1
GO:0048736	appendage development	1/1602	2/15655	4.89	0.194197	0.424026	LOC_Os09g35620	1
GO:0048737	imaginal disc-derived appendage development	1/1602	2/15655	4.89	0.194197	0.424026	LOC_Os09g35620	1
GO:0048749	compound eye development	1/1602	2/15655	4.89	0.194197	0.424026	LOC_Os09g35620	1
GO:0048766	root hair initiation	1/1602	2/15655	4.89	0.194197	0.424026	LOC_Os10g10580	1
GO:0048871	multicellular organismal homeostasis	1/1602	2/15655	4.89	0.194197	0.424026	LOC_Os09g35620	1
GO:0050670	regulation of lymphocyte proliferation	1/1602	2/15655	4.89	0.194197	0.424026	LOC_Os09g35620	1
GO:0050678	regulation of epithelial cell proliferation	1/1602	2/15655	4.89	0.194197	0.424026	LOC_Os09g35620	1
GO:0050708	regulation of protein secretion	1/1602	2/15655	4.89	0.194197	0.424026	LOC_Os04g47700	1
GO:0050863	regulation of T cell activation	1/1602	2/15655	4.89	0.194197	0.424026	LOC_Os09g35620	1
GO:0050865	regulation of cell activation	1/1602	2/15655	4.89	0.194197	0.424026	LOC_Os09g35620	1
GO:0051101	regulation of DNA binding	1/1602	2/15655	4.89	0.194197	0.424026	LOC_Os09g35620	1
GO:0051214	RNA virus induced gene silencing	1/1602	2/15655	4.89	0.194197	0.424026	LOC_Os03g38740	1
GO:0051249	regulation of lymphocyte activation	1/1602	2/15655	4.89	0.194197	0.424026	LOC_Os09g35620	1
GO:0051291	protein heterooligomerization	1/1602	2/15655	4.89	0.194197	0.424026	LOC_Os09g35620	1
GO:0051926	negative regulation of calcium ion transport	1/1602	2/15655	4.89	0.194197	0.424026	LOC_Os03g03920	1
GO:0060070	canonical Wnt signaling pathway	1/1602	2/15655	4.89	0.194197	0.424026	LOC_Os09g35620	1
GO:0060145	viral gene silencing in virus induced gene silencing	1/1602	2/15655	4.89	0.194197	0.424026	LOC_Os03g23050	1
GO:0060788	ectodermal placode formation	1/1602	2/15655	4.89	0.194197	0.424026	LOC_Os09g35620	1
GO:0060966	regulation of gene silencing by RNA	1/1602	2/15655	4.89	0.194197	0.424026	LOC_Os12g16290	1
GO:0060972	left/right pattern formation	1/1602	2/15655	4.89	0.194197	0.424026	LOC_Os09g35620	1
GO:0060993	kidney morphogenesis	1/1602	2/15655	4.89	0.194197	0.424026	LOC_Os09g35620	1
GO:0070407	oxidation-dependent protein catabolic process	1/1602	2/15655	4.89	0.194197	0.424026	LOC_Os07g48960	1
GO:0070535	histone H2A K63-linked ubiquitination	1/1602	2/15655	4.89	0.194197	0.424026	LOC_Os01g67850	1
GO:0070663	regulation of leukocyte proliferation	1/1602	2/15655	4.89	0.194197	0.424026	LOC_Os09g35620	1
GO:0070726	cell wall assembly	1/1602	2/15655	4.89	0.194197	0.424026	LOC_Os06g11990	1
GO:0070848	response to growth factor	1/1602	2/15655	4.89	0.194197	0.424026	LOC_Os09g35620	1
GO:0071363	cellular response to growth factor stimulus	1/1602	2/15655	4.89	0.194197	0.424026	LOC_Os09g35620	1
GO:0071453	cellular response to oxygen levels	1/1602	2/15655	4.89	0.194197	0.424026	LOC_Os03g03920	1
GO:0071668	plant-type cell wall assembly	1/1602	2/15655	4.89	0.194197	0.424026	LOC_Os06g11990	1
GO:0071696	ectodermal placode development	1/1602	2/15655	4.89	0.194197	0.424026	LOC_Os09g35620	1
GO:0071697	ectodermal placode morphogenesis	1/1602	2/15655	4.89	0.194197	0.424026	LOC_Os09g35620	1
GO:0071722	detoxification of arsenic-containing substance	1/1602	2/15655	4.89	0.194197	0.424026	LOC_Os04g17660	1
GO:0072175	epithelial tube formation	1/1602	2/15655	4.89	0.194197	0.424026	LOC_Os09g35620	1
GO:0072490	toluene-containing compound metabolic process	1/1602	2/15655	4.89	0.194197	0.424026	LOC_Os03g57200	1
GO:0072491	toluene-containing compound catabolic process	1/1602	2/15655	4.89	0.194197	0.424026	LOC_Os03g57200	1
GO:0072523	purine-containing compound catabolic process	1/1602	2/15655	4.89	0.194197	0.424026	LOC_Os09g39440	1
GO:0072529	pyrimidine-containing compound catabolic process	1/1602	2/15655	4.89	0.194197	0.424026	LOC_Os09g39440	1
GO:0072697	protein localization to cell cortex	1/1602	2/15655	4.89	0.194197	0.424026	LOC_Os06g11990	1
GO:0072699	protein localization to cortical microtubule cytoskeleton	1/1602	2/15655	4.89	0.194197	0.424026	LOC_Os06g11990	1
GO:0090596	sensory organ morphogenesis	1/1602	2/15655	4.89	0.194197	0.424026	LOC_Os09g35620	1
GO:0097352	autophagosome maturation	1/1602	2/15655	4.89	0.194197	0.424026	LOC_Os03g03920	1
GO:0198738	cell-cell signaling by wnt	1/1602	2/15655	4.89	0.194197	0.424026	LOC_Os09g35620	1
GO:1900111	positive regulation of histone H3-K9 dimethylation	1/1602	2/15655	4.89	0.194197	0.424026	LOC_Os03g58600	1
GO:1901019	regulation of calcium ion transmembrane transporter activity	1/1602	2/15655	4.89	0.194197	0.424026	LOC_Os03g03920	1
GO:1901020	negative regulation of calcium ion transmembrane transporter activity	1/1602	2/15655	4.89	0.194197	0.424026	LOC_Os03g03920	1
GO:1901215	negative regulation of neuron death	1/1602	2/15655	4.89	0.194197	0.424026	LOC_Os09g35620	1
GO:1901216	positive regulation of neuron death	1/1602	2/15655	4.89	0.194197	0.424026	LOC_Os09g35620	1
GO:1901339	regulation of store-operated calcium channel activity	1/1602	2/15655	4.89	0.194197	0.424026	LOC_Os03g03920	1
GO:1901340	negative regulation of store-operated calcium channel activity	1/1602	2/15655	4.89	0.194197	0.424026	LOC_Os03g03920	1
GO:1901672	positive regulation of systemic acquired resistance	1/1602	2/15655	4.89	0.194197	0.424026	LOC_Os10g38930	1
GO:1903069	regulation of ER-associated ubiquitin-dependent protein catabolic process	1/1602	2/15655	4.89	0.194197	0.424026	LOC_Os03g03920	1
GO:1903071	positive regulation of ER-associated ubiquitin-dependent protein catabolic process	1/1602	2/15655	4.89	0.194197	0.424026	LOC_Os03g03920	1
GO:1903169	regulation of calcium ion transmembrane transport	1/1602	2/15655	4.89	0.194197	0.424026	LOC_Os03g03920	1
GO:1903170	negative regulation of calcium ion transmembrane transport	1/1602	2/15655	4.89	0.194197	0.424026	LOC_Os03g03920	1
GO:1903203	regulation of oxidative stress-induced neuron death	1/1602	2/15655	4.89	0.194197	0.424026	LOC_Os09g35620	1
GO:1905114	cell surface receptor signaling pathway involved in cell-cell signaling	1/1602	2/15655	4.89	0.194197	0.424026	LOC_Os09g35620	1
GO:1990426	mitotic recombination-dependent replication fork processing	1/1602	2/15655	4.89	0.194197	0.424026	LOC_Os11g40150	1
GO:2000008	regulation of protein localization to cell surface	1/1602	2/15655	4.89	0.194197	0.424026	LOC_Os09g35620	1
GO:2000067	regulation of root morphogenesis	1/1602	2/15655	4.89	0.194197	0.424026	LOC_Os06g11990	1
GO:2000142	regulation of DNA-templated transcription, initiation	1/1602	2/15655	4.89	0.194197	0.424026	LOC_Os09g35620	1
GO:2000616	negative regulation of histone H3-K9 acetylation	1/1602	2/15655	4.89	0.194197	0.424026	LOC_Os03g58600	1
GO:2000677	regulation of transcription regulatory region DNA binding	1/1602	2/15655	4.89	0.194197	0.424026	LOC_Os09g35620	1
GO:2001234	negative regulation of apoptotic signaling pathway	1/1602	2/15655	4.89	0.194197	0.424026	LOC_Os09g35620	1
GO:0000726	non-recombinational repair	1/1602	3/15655	3.26	0.276667	0.503188	LOC_Os01g67850	1
GO:0001568	blood vessel development	1/1602	3/15655	3.26	0.276667	0.503188	LOC_Os09g35620	1
GO:0001654	eye development	1/1602	3/15655	3.26	0.276667	0.503188	LOC_Os09g35620	1
GO:0001818	negative regulation of cytokine production	1/1602	3/15655	3.26	0.276667	0.503188	LOC_Os01g73280	1
GO:0001944	vasculature development	1/1602	3/15655	3.26	0.276667	0.503188	LOC_Os09g35620	1
GO:0001952	regulation of cell-matrix adhesion	1/1602	3/15655	3.26	0.276667	0.503188	LOC_Os09g35620	1
GO:0002064	epithelial cell development	1/1602	3/15655	3.26	0.276667	0.503188	LOC_Os09g35620	1
GO:0002165	instar larval or pupal development	1/1602	3/15655	3.26	0.276667	0.503188	LOC_Os09g35620	1
GO:0002697	regulation of immune effector process	1/1602	3/15655	3.26	0.276667	0.503188	LOC_Os01g73280	1
GO:0002698	negative regulation of immune effector process	1/1602	3/15655	3.26	0.276667	0.503188	LOC_Os01g73280	1
GO:0003007	heart morphogenesis	1/1602	3/15655	3.26	0.276667	0.503188	LOC_Os09g35620	1
GO:0003352	regulation of cilium movement	1/1602	3/15655	3.26	0.276667	0.503188	LOC_Os05g02970	1
GO:0006013	mannose metabolic process	1/1602	3/15655	3.26	0.276667	0.503188	LOC_Os11g32260	1
GO:0006101	citrate metabolic process	1/1602	3/15655	3.26	0.276667	0.503188	LOC_Os02g10070	1
GO:0006152	purine nucleoside catabolic process	1/1602	3/15655	3.26	0.276667	0.503188	LOC_Os09g39440	1
GO:0006415	translational termination	1/1602	3/15655	3.26	0.276667	0.503188	LOC_Os02g18180	1
GO:0006424	glutamyl-tRNA aminoacylation	1/1602	3/15655	3.26	0.276667	0.503188	LOC_Os02g02860	1
GO:0006452	translational frameshifting	1/1602	3/15655	3.26	0.276667	0.503188	LOC_Os07g40580	1
GO:0006527	arginine catabolic process	1/1602	3/15655	3.26	0.276667	0.503188	LOC_Os06g04070	1
GO:0006529	asparagine biosynthetic process	1/1602	3/15655	3.26	0.276667	0.503188	LOC_Os03g18130	1
GO:0006538	glutamate catabolic process	1/1602	3/15655	3.26	0.276667	0.503188	LOC_Os03g13300	1
GO:0006546	glycine catabolic process	1/1602	3/15655	3.26	0.276667	0.503188	LOC_Os04g53230	1
GO:0006627	protein processing involved in protein targeting to mitochondrion	1/1602	3/15655	3.26	0.276667	0.503188	LOC_Os04g08340	1
GO:0006772	thiamine metabolic process	1/1602	3/15655	3.26	0.276667	0.503188	LOC_Os01g25440	1
GO:0007026	negative regulation of microtubule depolymerization	1/1602	3/15655	3.26	0.276667	0.503188	LOC_Os02g57120	1
GO:0007043	cell-cell junction assembly	1/1602	3/15655	3.26	0.276667	0.503188	LOC_Os09g35620	1
GO:0007051	spindle organization	1/1602	3/15655	3.26	0.276667	0.503188	LOC_Os01g73280	1
GO:0007155	cell adhesion	1/1602	3/15655	3.26	0.276667	0.503188	LOC_Os09g35620	1
GO:0007162	negative regulation of cell adhesion	1/1602	3/15655	3.26	0.276667	0.503188	LOC_Os09g35620	1
GO:0007369	gastrulation	1/1602	3/15655	3.26	0.276667	0.503188	LOC_Os09g35620	1
GO:0007424	open tracheal system development	1/1602	3/15655	3.26	0.276667	0.503188	LOC_Os09g35620	1
GO:0007507	heart development	1/1602	3/15655	3.26	0.276667	0.503188	LOC_Os09g35620	1
GO:0008544	epidermis development	1/1602	3/15655	3.26	0.276667	0.503188	LOC_Os09g35620	1
GO:0009119	ribonucleoside metabolic process	1/1602	3/15655	3.26	0.276667	0.503188	LOC_Os09g39440	1
GO:0009228	thiamine biosynthetic process	1/1602	3/15655	3.26	0.276667	0.503188	LOC_Os03g47610	1
GO:0009229	thiamine diphosphate biosynthetic process	1/1602	3/15655	3.26	0.276667	0.503188	LOC_Os01g25440	1
GO:0009718	anthocyanin-containing compound biosynthetic process	1/1602	3/15655	3.26	0.276667	0.503188	LOC_Os05g04220	1
GO:0009827	plant-type cell wall modification	1/1602	3/15655	3.26	0.276667	0.503188	LOC_Os03g18120	1
GO:0009862	systemic acquired resistance, salicylic acid mediated signaling pathway	1/1602	3/15655	3.26	0.276667	0.503188	LOC_Os02g39160	1
GO:0009886	post-embryonic animal morphogenesis	1/1602	3/15655	3.26	0.276667	0.503188	LOC_Os09g35620	1
GO:0009900	dehiscence	1/1602	3/15655	3.26	0.276667	0.503188	LOC_Os06g11990	1
GO:0009913	epidermal cell differentiation	1/1602	3/15655	3.26	0.276667	0.503188	LOC_Os09g35620	1
GO:0010264	myo-inositol hexakisphosphate biosynthetic process	1/1602	3/15655	3.26	0.276667	0.503188	LOC_Os02g57400	1
GO:0010438	cellular response to sulfur starvation	1/1602	3/15655	3.26	0.276667	0.503188	LOC_Os01g01650	1
GO:0010495	long-distance posttranscriptional gene silencing	1/1602	3/15655	3.26	0.276667	0.503188	LOC_Os04g48370	1
GO:0010540	basipetal auxin transport	1/1602	3/15655	3.26	0.276667	0.503188	LOC_Os03g53990	1
GO:0010594	regulation of endothelial cell migration	1/1602	3/15655	3.26	0.276667	0.503188	LOC_Os09g35620	1
GO:0010632	regulation of epithelial cell migration	1/1602	3/15655	3.26	0.276667	0.503188	LOC_Os09g35620	1
GO:0010810	regulation of cell-substrate adhesion	1/1602	3/15655	3.26	0.276667	0.503188	LOC_Os09g35620	1
GO:0016444	somatic cell DNA recombination	1/1602	3/15655	3.26	0.276667	0.503188	LOC_Os01g67850	1
GO:0019751	polyol metabolic process	1/1602	3/15655	3.26	0.276667	0.503188	LOC_Os02g57400	1
GO:0019932	second-messenger-mediated signaling	1/1602	3/15655	3.26	0.276667	0.503188	LOC_Os12g08670	1
GO:0030097	hemopoiesis	1/1602	3/15655	3.26	0.276667	0.503188	LOC_Os09g35620	1
GO:0030835	negative regulation of actin filament depolymerization	1/1602	3/15655	3.26	0.276667	0.503188	LOC_Os05g06110	1
GO:0030902	hindbrain development	1/1602	3/15655	3.26	0.276667	0.503188	LOC_Os09g35620	1
GO:0031016	pancreas development	1/1602	3/15655	3.26	0.276667	0.503188	LOC_Os09g35620	1
GO:0031033	myosin filament organization	1/1602	3/15655	3.26	0.276667	0.503188	LOC_Os12g40260	1
GO:0031035	myosin filament disassembly	1/1602	3/15655	3.26	0.276667	0.503188	LOC_Os12g40260	1
GO:0031037	myosin II filament disassembly	1/1602	3/15655	3.26	0.276667	0.503188	LOC_Os12g40260	1
GO:0031038	myosin II filament organization	1/1602	3/15655	3.26	0.276667	0.503188	LOC_Os12g40260	1
GO:0031110	regulation of microtubule polymerization or depolymerization	1/1602	3/15655	3.26	0.276667	0.503188	LOC_Os02g57120	1
GO:0031111	negative regulation of microtubule polymerization or depolymerization	1/1602	3/15655	3.26	0.276667	0.503188	LOC_Os02g57120	1
GO:0031114	regulation of microtubule depolymerization	1/1602	3/15655	3.26	0.276667	0.503188	LOC_Os02g57120	1
GO:0031468	nuclear envelope reassembly	1/1602	3/15655	3.26	0.276667	0.503188	LOC_Os06g42824	1
GO:0032366	intracellular sterol transport	1/1602	3/15655	3.26	0.276667	0.503188	LOC_Os03g57420	1
GO:0032447	protein urmylation	1/1602	3/15655	3.26	0.276667	0.503188	LOC_Os01g41565	1
GO:0032480	negative regulation of type I interferon production	1/1602	3/15655	3.26	0.276667	0.503188	LOC_Os01g73280	1
GO:0032544	plastid translation	1/1602	3/15655	3.26	0.276667	0.503188	LOC_Os06g46930	1
GO:0032958	inositol phosphate biosynthetic process	1/1602	3/15655	3.26	0.276667	0.503188	LOC_Os02g57400	1
GO:0033233	regulation of protein sumoylation	1/1602	3/15655	3.26	0.276667	0.503188	LOC_Os09g35620	1
GO:0033523	histone H2B ubiquitination	1/1602	3/15655	3.26	0.276667	0.503188	LOC_Os01g67850	1
GO:0034329	cell junction assembly	1/1602	3/15655	3.26	0.276667	0.503188	LOC_Os09g35620	1
GO:0034394	protein localization to cell surface	1/1602	3/15655	3.26	0.276667	0.503188	LOC_Os09g35620	1
GO:0034453	microtubule anchoring	1/1602	3/15655	3.26	0.276667	0.503188	LOC_Os02g57120	1
GO:0034551	mitochondrial respiratory chain complex III assembly	1/1602	3/15655	3.26	0.276667	0.503188	LOC_Os08g14860	1
GO:0035050	embryonic heart tube development	1/1602	3/15655	3.26	0.276667	0.503188	LOC_Os09g35620	1
GO:0035821	modification of morphology or physiology of other organism	1/1602	3/15655	3.26	0.276667	0.503188	LOC_Os03g23050	1
GO:0036444	mitochondrial calcium uptake	1/1602	3/15655	3.26	0.276667	0.503188	LOC_Os03g13050	1
GO:0039531	regulation of viral-induced cytoplasmic pattern recognition receptor signaling pathway	1/1602	3/15655	3.26	0.276667	0.503188	LOC_Os01g73280	1
GO:0039532	negative regulation of viral-induced cytoplasmic pattern recognition receptor signaling pathway	1/1602	3/15655	3.26	0.276667	0.503188	LOC_Os01g73280	1
GO:0039535	regulation of RIG-I signaling pathway	1/1602	3/15655	3.26	0.276667	0.503188	LOC_Os01g73280	1
GO:0039536	negative regulation of RIG-I signaling pathway	1/1602	3/15655	3.26	0.276667	0.503188	LOC_Os01g73280	1
GO:0040014	regulation of multicellular organism growth	1/1602	3/15655	3.26	0.276667	0.503188	LOC_Os06g16300	1
GO:0040017	positive regulation of locomotion	1/1602	3/15655	3.26	0.276667	0.503188	LOC_Os09g35620	1
GO:0042148	strand invasion	1/1602	3/15655	3.26	0.276667	0.503188	LOC_Os11g40150	1
GO:0042779	tRNA 3'-trailer cleavage	1/1602	3/15655	3.26	0.276667	0.503188	LOC_Os02g45120	1
GO:0043137	DNA replication, removal of RNA primer	1/1602	3/15655	3.26	0.276667	0.503188	LOC_Os11g05570	1
GO:0043408	regulation of MAPK cascade	1/1602	3/15655	3.26	0.276667	0.503188	LOC_Os09g35620	1
GO:0043410	positive regulation of MAPK cascade	1/1602	3/15655	3.26	0.276667	0.503188	LOC_Os09g35620	1
GO:0043434	response to peptide hormone	1/1602	3/15655	3.26	0.276667	0.503188	LOC_Os09g35620	1
GO:0043523	regulation of neuron apoptotic process	1/1602	3/15655	3.26	0.276667	0.503188	LOC_Os09g35620	1
GO:0043562	cellular response to nitrogen levels	1/1602	3/15655	3.26	0.276667	0.503188	LOC_Os03g58040	1
GO:0043624	cellular protein complex disassembly	1/1602	3/15655	3.26	0.276667	0.503188	LOC_Os12g40260	1
GO:0045055	regulated exocytosis	1/1602	3/15655	3.26	0.276667	0.503188	LOC_Os09g35620	1
GO:0045815	positive regulation of gene expression, epigenetic	1/1602	3/15655	3.26	0.276667	0.503188	LOC_Os09g35620	1
GO:0046131	pyrimidine ribonucleoside metabolic process	1/1602	3/15655	3.26	0.276667	0.503188	LOC_Os09g39440	1
GO:0046173	polyol biosynthetic process	1/1602	3/15655	3.26	0.276667	0.503188	LOC_Os02g57400	1
GO:0046294	formaldehyde catabolic process	1/1602	3/15655	3.26	0.276667	0.503188	LOC_Os07g42924	1
GO:0046473	phosphatidic acid metabolic process	1/1602	3/15655	3.26	0.276667	0.503188	LOC_Os09g37100	1
GO:0046825	regulation of protein export from nucleus	1/1602	3/15655	3.26	0.276667	0.503188	LOC_Os11g31470	1
GO:0046835	carbohydrate phosphorylation	1/1602	3/15655	3.26	0.276667	0.503188	LOC_Os03g13690	1
GO:0048514	blood vessel morphogenesis	1/1602	3/15655	3.26	0.276667	0.503188	LOC_Os09g35620	1
GO:0048534	hematopoietic or lymphoid organ development	1/1602	3/15655	3.26	0.276667	0.503188	LOC_Os09g35620	1
GO:0048546	digestive tract morphogenesis	1/1602	3/15655	3.26	0.276667	0.503188	LOC_Os09g35620	1
GO:0050768	negative regulation of neurogenesis	1/1602	3/15655	3.26	0.276667	0.503188	LOC_Os09g35620	1
GO:0050992	dimethylallyl diphosphate biosynthetic process	1/1602	3/15655	3.26	0.276667	0.503188	LOC_Os03g52170	1
GO:0051047	positive regulation of secretion	1/1602	3/15655	3.26	0.276667	0.503188	LOC_Os04g47700	1
GO:0051098	regulation of binding	1/1602	3/15655	3.26	0.276667	0.503188	LOC_Os09g35620	1
GO:0051170	nuclear import	1/1602	3/15655	3.26	0.276667	0.503188	LOC_Os12g16290	1
GO:0051228	mitotic spindle disassembly	1/1602	3/15655	3.26	0.276667	0.503188	LOC_Os01g73280	1
GO:0051230	spindle disassembly	1/1602	3/15655	3.26	0.276667	0.503188	LOC_Os01g73280	1
GO:0051272	positive regulation of cellular component movement	1/1602	3/15655	3.26	0.276667	0.503188	LOC_Os09g35620	1
GO:0051592	response to calcium ion	1/1602	3/15655	3.26	0.276667	0.503188	LOC_Os06g11990	1
GO:0051648	vesicle localization	1/1602	3/15655	3.26	0.276667	0.503188	LOC_Os09g35620	1
GO:0051650	establishment of vesicle localization	1/1602	3/15655	3.26	0.276667	0.503188	LOC_Os09g35620	1
GO:0051817	modification of morphology or physiology of other organism involved in symbiotic interaction	1/1602	3/15655	3.26	0.276667	0.503188	LOC_Os03g23050	1
GO:0051961	negative regulation of nervous system development	1/1602	3/15655	3.26	0.276667	0.503188	LOC_Os09g35620	1
GO:0051974	negative regulation of telomerase activity	1/1602	3/15655	3.26	0.276667	0.503188	LOC_Os01g73280	1
GO:0055062	phosphate ion homeostasis	1/1602	3/15655	3.26	0.276667	0.503188	LOC_Os05g48390	1
GO:0060249	anatomical structure homeostasis	1/1602	3/15655	3.26	0.276667	0.503188	LOC_Os09g35620	1
GO:0061912	selective autophagy	1/1602	3/15655	3.26	0.276667	0.503188	LOC_Os03g03920	1
GO:0070651	nonfunctional rRNA decay	1/1602	3/15655	3.26	0.276667	0.503188	LOC_Os01g73280	1
GO:0071219	cellular response to molecule of bacterial origin	1/1602	3/15655	3.26	0.276667	0.503188	LOC_Os02g31160	1
GO:0071266	'de novo' L-methionine biosynthetic process	1/1602	3/15655	3.26	0.276667	0.503188	LOC_Os06g07860	1
GO:0071375	cellular response to peptide hormone stimulus	1/1602	3/15655	3.26	0.276667	0.503188	LOC_Os09g35620	1
GO:0071456	cellular response to hypoxia	1/1602	3/15655	3.26	0.276667	0.503188	LOC_Os03g03920	1
GO:0072358	cardiovascular system development	1/1602	3/15655	3.26	0.276667	0.503188	LOC_Os09g35620	1
GO:0072671	mitochondria-associated ubiquitin-dependent protein catabolic process	1/1602	3/15655	3.26	0.276667	0.503188	LOC_Os01g73280	1
GO:0097327	response to antineoplastic agent	1/1602	3/15655	3.26	0.276667	0.503188	LOC_Os09g35620	1
GO:1901214	regulation of neuron death	1/1602	3/15655	3.26	0.276667	0.503188	LOC_Os09g35620	1
GO:1901342	regulation of vasculature development	1/1602	3/15655	3.26	0.276667	0.503188	LOC_Os09g35620	1
GO:1901652	response to peptide	1/1602	3/15655	3.26	0.276667	0.503188	LOC_Os09g35620	1
GO:1901653	cellular response to peptide	1/1602	3/15655	3.26	0.276667	0.503188	LOC_Os09g35620	1
GO:1901658	glycosyl compound catabolic process	1/1602	3/15655	3.26	0.276667	0.503188	LOC_Os09g39440	1
GO:1902105	regulation of leukocyte differentiation	1/1602	3/15655	3.26	0.276667	0.503188	LOC_Os09g35620	1
GO:1902106	negative regulation of leukocyte differentiation	1/1602	3/15655	3.26	0.276667	0.503188	LOC_Os09g35620	1
GO:1902175	regulation of oxidative stress-induced intrinsic apoptotic signaling pathway	1/1602	3/15655	3.26	0.276667	0.503188	LOC_Os03g03920	1
GO:1903321	negative regulation of protein modification by small protein conjugation or removal	1/1602	3/15655	3.26	0.276667	0.503188	LOC_Os09g35620	1
GO:1903513	endoplasmic reticulum to cytosol transport	1/1602	3/15655	3.26	0.276667	0.503188	LOC_Os01g73280	1
GO:1903532	positive regulation of secretion by cell	1/1602	3/15655	3.26	0.276667	0.503188	LOC_Os04g47700	1
GO:1904029	regulation of cyclin-dependent protein kinase activity	1/1602	3/15655	3.26	0.276667	0.503188	LOC_Os09g25550	1
GO:1904292	regulation of ERAD pathway	1/1602	3/15655	3.26	0.276667	0.503188	LOC_Os03g03920	1
GO:1905421	regulation of plant organ morphogenesis	1/1602	3/15655	3.26	0.276667	0.503188	LOC_Os06g11990	1
GO:1905897	regulation of response to endoplasmic reticulum stress	1/1602	3/15655	3.26	0.276667	0.503188	LOC_Os03g03920	1
GO:1905898	positive regulation of response to endoplasmic reticulum stress	1/1602	3/15655	3.26	0.276667	0.503188	LOC_Os03g03920	1
GO:2000035	regulation of stem cell division	1/1602	3/15655	3.26	0.276667	0.503188	LOC_Os09g39310	1
GO:2000114	regulation of establishment of cell polarity	1/1602	3/15655	3.26	0.276667	0.503188	LOC_Os10g10580	1
GO:2000147	positive regulation of cell motility	1/1602	3/15655	3.26	0.276667	0.503188	LOC_Os09g35620	1
GO:2000279	negative regulation of DNA biosynthetic process	1/1602	3/15655	3.26	0.276667	0.503188	LOC_Os01g73280	1
GO:2001242	regulation of intrinsic apoptotic signaling pathway	1/1602	3/15655	3.26	0.276667	0.503188	LOC_Os03g03920	1
GO:0001505	regulation of neurotransmitter levels	1/1602	4/15655	2.44	0.350701	0.567741	LOC_Os12g08670	1
GO:0001655	urogenital system development	1/1602	4/15655	2.44	0.350701	0.567741	LOC_Os09g35620	1
GO:0001763	morphogenesis of a branching structure	1/1602	4/15655	2.44	0.350701	0.567741	LOC_Os09g35620	1
GO:0001822	kidney development	1/1602	4/15655	2.44	0.350701	0.567741	LOC_Os09g35620	1
GO:0005986	sucrose biosynthetic process	1/1602	4/15655	2.44	0.350701	0.567741	LOC_Os05g05270	1
GO:0006145	purine nucleobase catabolic process	1/1602	4/15655	2.44	0.350701	0.567741	LOC_Os04g58390	1
GO:0006360	transcription from RNA polymerase I promoter	1/1602	4/15655	2.44	0.350701	0.567741	LOC_Os03g13720	1
GO:0006384	transcription initiation from RNA polymerase III promoter	1/1602	4/15655	2.44	0.350701	0.567741	LOC_Os05g49480	1
GO:0006419	alanyl-tRNA aminoacylation	1/1602	4/15655	2.44	0.350701	0.567741	LOC_Os07g15440	1
GO:0006429	leucyl-tRNA aminoacylation	1/1602	4/15655	2.44	0.350701	0.567741	LOC_Os05g15150	1
GO:0006537	glutamate biosynthetic process	1/1602	4/15655	2.44	0.350701	0.567741	LOC_Os05g48200	1
GO:0006557	S-adenosylmethioninamine biosynthetic process	1/1602	4/15655	2.44	0.350701	0.567741	LOC_Os09g25620	1
GO:0006646	phosphatidylethanolamine biosynthetic process	1/1602	4/15655	2.44	0.350701	0.567741	LOC_Os01g08760	1
GO:0006680	glucosylceramide catabolic process	1/1602	4/15655	2.44	0.350701	0.567741	LOC_Os11g13810	1
GO:0006814	sodium ion transport	1/1602	4/15655	2.44	0.350701	0.567741	LOC_Os09g25090	1
GO:0006898	receptor-mediated endocytosis	1/1602	4/15655	2.44	0.350701	0.567741	LOC_Os10g10580	1
GO:0006998	nuclear envelope organization	1/1602	4/15655	2.44	0.350701	0.567741	LOC_Os06g42824	1
GO:0007016	cytoskeletal anchoring at plasma membrane	1/1602	4/15655	2.44	0.350701	0.567741	LOC_Os09g35620	1
GO:0007052	mitotic spindle organization	1/1602	4/15655	2.44	0.350701	0.567741	LOC_Os01g73280	1
GO:0007423	sensory organ development	1/1602	4/15655	2.44	0.350701	0.567741	LOC_Os09g35620	1
GO:0008202	steroid metabolic process	1/1602	4/15655	2.44	0.350701	0.567741	Oryza_sativa_newGene_3675	1
GO:0008612	peptidyl-lysine modification to peptidyl-hypusine	1/1602	4/15655	2.44	0.350701	0.567741	LOC_Os09g25370	1
GO:0009245	lipid A biosynthetic process	1/1602	4/15655	2.44	0.350701	0.567741	LOC_Os07g04200	1
GO:0009395	phospholipid catabolic process	1/1602	4/15655	2.44	0.350701	0.567741	LOC_Os09g37100	1
GO:0009407	toxin catabolic process	1/1602	4/15655	2.44	0.350701	0.567741	LOC_Os03g57200	1
GO:0009612	response to mechanical stimulus	1/1602	4/15655	2.44	0.350701	0.567741	LOC_Os09g35620	1
GO:0009694	jasmonic acid metabolic process	1/1602	4/15655	2.44	0.350701	0.567741	LOC_Os05g50890	1
GO:0009850	auxin metabolic process	1/1602	4/15655	2.44	0.350701	0.567741	LOC_Os08g04130	1
GO:0009994	oocyte differentiation	1/1602	4/15655	2.44	0.350701	0.567741	LOC_Os09g35620	1
GO:0010043	response to zinc ion	1/1602	4/15655	2.44	0.350701	0.567741	LOC_Os02g11720	1
GO:0010075	regulation of meristem growth	1/1602	4/15655	2.44	0.350701	0.567741	LOC_Os01g70260	1
GO:0010136	ureide catabolic process	1/1602	4/15655	2.44	0.350701	0.567741	LOC_Os04g58390	1
GO:0010466	negative regulation of peptidase activity	1/1602	4/15655	2.44	0.350701	0.567741	LOC_Os03g62790	1
GO:0010499	proteasomal ubiquitin-independent protein catabolic process	1/1602	4/15655	2.44	0.350701	0.567741	LOC_Os07g42260	1
GO:0010721	negative regulation of cell development	1/1602	4/15655	2.44	0.350701	0.567741	LOC_Os09g35620	1
GO:0015706	nitrate transport	1/1602	4/15655	2.44	0.350701	0.567741	LOC_Os02g43770	1
GO:0018342	protein prenylation	1/1602	4/15655	2.44	0.350701	0.567741	LOC_Os01g49110	1
GO:0019464	glycine decarboxylation via glycine cleavage system	1/1602	4/15655	2.44	0.350701	0.567741	LOC_Os10g37180	1
GO:0019747	regulation of isoprenoid metabolic process	1/1602	4/15655	2.44	0.350701	0.567741	LOC_Os03g59610	1
GO:0030003	cellular cation homeostasis	1/1602	4/15655	2.44	0.350701	0.567741	LOC_Os09g09930	1
GO:0030111	regulation of Wnt signaling pathway	1/1602	4/15655	2.44	0.350701	0.567741	LOC_Os09g35620	1
GO:0030518	intracellular steroid hormone receptor signaling pathway	1/1602	4/15655	2.44	0.350701	0.567741	LOC_Os09g35620	1
GO:0030521	androgen receptor signaling pathway	1/1602	4/15655	2.44	0.350701	0.567741	LOC_Os09g35620	1
GO:0031145	anaphase-promoting complex-dependent catabolic process	1/1602	4/15655	2.44	0.350701	0.567741	LOC_Os05g50360	1
GO:0031936	negative regulation of chromatin silencing	1/1602	4/15655	2.44	0.350701	0.567741	LOC_Os01g42460	1
GO:0033037	polysaccharide localization	1/1602	4/15655	2.44	0.350701	0.567741	LOC_Os01g42090	1
GO:0033314	mitotic DNA replication checkpoint	1/1602	4/15655	2.44	0.350701	0.567741	LOC_Os11g08660	1
GO:0034097	response to cytokine	1/1602	4/15655	2.44	0.350701	0.567741	LOC_Os09g35620	1
GO:0035148	tube formation	1/1602	4/15655	2.44	0.350701	0.567741	LOC_Os09g35620	1
GO:0035265	organ growth	1/1602	4/15655	2.44	0.350701	0.567741	LOC_Os09g35620	1
GO:0035637	multicellular organismal signaling	1/1602	4/15655	2.44	0.350701	0.567741	LOC_Os09g35620	1
GO:0043009	chordate embryonic development	1/1602	4/15655	2.44	0.350701	0.567741	LOC_Os09g35620	1
GO:0044380	protein localization to cytoskeleton	1/1602	4/15655	2.44	0.350701	0.567741	LOC_Os06g11990	1
GO:0045037	protein import into chloroplast stroma	1/1602	4/15655	2.44	0.350701	0.567741	LOC_Os05g02060	1
GO:0045040	protein import into mitochondrial outer membrane	1/1602	4/15655	2.44	0.350701	0.567741	LOC_Os11g01490	1
GO:0045471	response to ethanol	1/1602	4/15655	2.44	0.350701	0.567741	LOC_Os03g16020	1
GO:0045785	positive regulation of cell adhesion	1/1602	4/15655	2.44	0.350701	0.567741	LOC_Os09g35620	1
GO:0045841	negative regulation of mitotic metaphase/anaphase transition	1/1602	4/15655	2.44	0.350701	0.567741	LOC_Os01g15340	1
GO:0048599	oocyte development	1/1602	4/15655	2.44	0.350701	0.567741	LOC_Os09g35620	1
GO:0050687	negative regulation of defense response to virus	1/1602	4/15655	2.44	0.350701	0.567741	LOC_Os01g73280	1
GO:0050688	regulation of defense response to virus	1/1602	4/15655	2.44	0.350701	0.567741	LOC_Os01g73280	1
GO:0050767	regulation of neurogenesis	1/1602	4/15655	2.44	0.350701	0.567741	LOC_Os09g35620	1
GO:0050808	synapse organization	1/1602	4/15655	2.44	0.350701	0.567741	LOC_Os09g35620	1
GO:0051131	chaperone-mediated protein complex assembly	1/1602	4/15655	2.44	0.350701	0.567741	LOC_Os07g48960	1
GO:0051274	beta-glucan biosynthetic process	1/1602	4/15655	2.44	0.350701	0.567741	LOC_Os06g11990	1
GO:0051570	regulation of histone H3-K9 methylation	1/1602	4/15655	2.44	0.350701	0.567741	LOC_Os01g42460	1
GO:0051762	sesquiterpene biosynthetic process	1/1602	4/15655	2.44	0.350701	0.567741	LOC_Os03g18790	1
GO:0052386	cell wall thickening	1/1602	4/15655	2.44	0.350701	0.567741	LOC_Os01g42090	1
GO:0052543	callose deposition in cell wall	1/1602	4/15655	2.44	0.350701	0.567741	LOC_Os01g42090	1
GO:0052545	callose localization	1/1602	4/15655	2.44	0.350701	0.567741	LOC_Os01g42090	1
GO:0055076	transition metal ion homeostasis	1/1602	4/15655	2.44	0.350701	0.567741	LOC_Os09g09930	1
GO:0060178	regulation of exocyst localization	1/1602	4/15655	2.44	0.350701	0.567741	LOC_Os03g63250	1
GO:0060828	regulation of canonical Wnt signaling pathway	1/1602	4/15655	2.44	0.350701	0.567741	LOC_Os09g35620	1
GO:0071249	cellular response to nitrate	1/1602	4/15655	2.44	0.350701	0.567741	LOC_Os02g43770	1
GO:0071281	cellular response to iron ion	1/1602	4/15655	2.44	0.350701	0.567741	LOC_Os09g39310	1
GO:0071629	ubiquitin-dependent catabolism of misfolded proteins by cytoplasm-associated proteasome	1/1602	4/15655	2.44	0.350701	0.567741	LOC_Os01g73280	1
GO:0072001	renal system development	1/1602	4/15655	2.44	0.350701	0.567741	LOC_Os09g35620	1
GO:0072698	protein localization to microtubule cytoskeleton	1/1602	4/15655	2.44	0.350701	0.567741	LOC_Os06g11990	1
GO:0090114	COPII-coated vesicle budding	1/1602	4/15655	2.44	0.350701	0.567741	LOC_Os09g28610	1
GO:0090287	regulation of cellular response to growth factor stimulus	1/1602	4/15655	2.44	0.350701	0.567741	LOC_Os09g35620	1
GO:0090344	negative regulation of cell aging	1/1602	4/15655	2.44	0.350701	0.567741	LOC_Os11g05470	1
GO:0090502	RNA phosphodiester bond hydrolysis, endonucleolytic	1/1602	4/15655	2.44	0.350701	0.567741	LOC_Os01g04200	1
GO:0098900	regulation of action potential	1/1602	4/15655	2.44	0.350701	0.567741	LOC_Os09g35620	1
GO:0098901	regulation of cardiac muscle cell action potential	1/1602	4/15655	2.44	0.350701	0.567741	LOC_Os09g35620	1
GO:1900458	negative regulation of brassinosteroid mediated signaling pathway	1/1602	4/15655	2.44	0.350701	0.567741	LOC_Os07g38170	1
GO:1901136	carbohydrate derivative catabolic process	1/1602	4/15655	2.44	0.350701	0.567741	LOC_Os09g39440	1
GO:1903706	regulation of hemopoiesis	1/1602	4/15655	2.44	0.350701	0.567741	LOC_Os09g35620	1
GO:1903707	negative regulation of hemopoiesis	1/1602	4/15655	2.44	0.350701	0.567741	LOC_Os09g35620	1
GO:1904294	positive regulation of ERAD pathway	1/1602	4/15655	2.44	0.350701	0.567741	LOC_Os03g03920	1
GO:1904668	positive regulation of ubiquitin protein ligase activity	1/1602	4/15655	2.44	0.350701	0.567741	LOC_Os02g47180	1
GO:1905330	regulation of morphogenesis of an epithelium	1/1602	4/15655	2.44	0.350701	0.567741	LOC_Os09g35620	1
GO:2000069	regulation of post-embryonic root development	1/1602	4/15655	2.44	0.350701	0.567741	LOC_Os09g39310	1
GO:2000070	regulation of response to water deprivation	1/1602	4/15655	2.44	0.350701	0.567741	LOC_Os08g04130	1
GO:2001022	positive regulation of response to DNA damage stimulus	1/1602	4/15655	2.44	0.350701	0.567741	LOC_Os01g67850	1
GO:0000054	ribosomal subunit export from nucleus	1/1602	5/15655	1.95	0.417161	0.610481	LOC_Os02g18180	1
GO:0000737	DNA catabolic process, endonucleolytic	1/1602	5/15655	1.95	0.417161	0.610481	LOC_Os12g42760	1
GO:0001889	liver development	1/1602	5/15655	1.95	0.417161	0.610481	LOC_Os09g35620	1
GO:0001934	positive regulation of protein phosphorylation	1/1602	5/15655	1.95	0.417161	0.610481	LOC_Os09g35620	1
GO:0002009	morphogenesis of an epithelium	1/1602	5/15655	1.95	0.417161	0.610481	LOC_Os09g35620	1
GO:0002238	response to molecule of fungal origin	1/1602	5/15655	1.95	0.417161	0.610481	LOC_Os07g49114	1
GO:0002832	negative regulation of response to biotic stimulus	1/1602	5/15655	1.95	0.417161	0.610481	LOC_Os01g73280	1
GO:0003400	regulation of COPII vesicle coating	1/1602	5/15655	1.95	0.417161	0.610481	LOC_Os03g58570	1
GO:0006213	pyrimidine nucleoside metabolic process	1/1602	5/15655	1.95	0.417161	0.610481	LOC_Os09g39440	1
GO:0006268	DNA unwinding involved in DNA replication	1/1602	5/15655	1.95	0.417161	0.610481	LOC_Os11g29380	1
GO:0006353	DNA-templated transcription, termination	1/1602	5/15655	1.95	0.417161	0.610481	LOC_Os01g10810	1
GO:0006808	regulation of nitrogen utilization	1/1602	5/15655	1.95	0.417161	0.610481	LOC_Os05g04220	1
GO:0006875	cellular metal ion homeostasis	1/1602	5/15655	1.95	0.417161	0.610481	LOC_Os09g09930	1
GO:0006878	cellular copper ion homeostasis	1/1602	5/15655	1.95	0.417161	0.610481	LOC_Os03g25470	1
GO:0007178	transmembrane receptor protein serine/threonine kinase signaling pathway	1/1602	5/15655	1.95	0.417161	0.610481	LOC_Os06g16300	1
GO:0007417	central nervous system development	1/1602	5/15655	1.95	0.417161	0.610481	LOC_Os09g35620	1
GO:0007420	brain development	1/1602	5/15655	1.95	0.417161	0.610481	LOC_Os09g35620	1
GO:0009062	fatty acid catabolic process	1/1602	5/15655	1.95	0.417161	0.610481	LOC_Os04g47120	1
GO:0009298	GDP-mannose biosynthetic process	1/1602	5/15655	1.95	0.417161	0.610481	LOC_Os01g03710	1
GO:0009704	de-etiolation	1/1602	5/15655	1.95	0.417161	0.610481	LOC_Os01g72350	1
GO:0009785	blue light signaling pathway	1/1602	5/15655	1.95	0.417161	0.610481	LOC_Os03g62790	1
GO:0010039	response to iron ion	1/1602	5/15655	1.95	0.417161	0.610481	LOC_Os09g39310	1
GO:0010082	regulation of root meristem growth	1/1602	5/15655	1.95	0.417161	0.610481	LOC_Os11g29380	1
GO:0010226	response to lithium ion	1/1602	5/15655	1.95	0.417161	0.610481	LOC_Os09g35620	1
GO:0010942	positive regulation of cell death	1/1602	5/15655	1.95	0.417161	0.610481	LOC_Os09g35620	1
GO:0015698	inorganic anion transport	1/1602	5/15655	1.95	0.417161	0.610481	LOC_Os02g43770	1
GO:0015936	coenzyme A metabolic process	1/1602	5/15655	1.95	0.417161	0.610481	LOC_Os09g31970	1
GO:0019287	isopentenyl diphosphate biosynthetic process, mevalonate pathway	1/1602	5/15655	1.95	0.417161	0.610481	LOC_Os11g37330	1
GO:0022407	regulation of cell-cell adhesion	1/1602	5/15655	1.95	0.417161	0.610481	LOC_Os09g35620	1
GO:0022413	reproductive process in single-celled organism	1/1602	5/15655	1.95	0.417161	0.610481	LOC_Os10g03400	1
GO:0022898	regulation of transmembrane transporter activity	1/1602	5/15655	1.95	0.417161	0.610481	LOC_Os03g03920	1
GO:0030437	ascospore formation	1/1602	5/15655	1.95	0.417161	0.610481	LOC_Os10g03400	1
GO:0030855	epithelial cell differentiation	1/1602	5/15655	1.95	0.417161	0.610481	LOC_Os09g35620	1
GO:0030970	retrograde protein transport, ER to cytosol	1/1602	5/15655	1.95	0.417161	0.610481	LOC_Os01g73280	1
GO:0031050	dsRNA fragmentation	1/1602	5/15655	1.95	0.417161	0.610481	LOC_Os04g48370	1
GO:0031058	positive regulation of histone modification	1/1602	5/15655	1.95	0.417161	0.610481	LOC_Os09g35620	1
GO:0031062	positive regulation of histone methylation	1/1602	5/15655	1.95	0.417161	0.610481	LOC_Os09g35620	1
GO:0031109	microtubule polymerization or depolymerization	1/1602	5/15655	1.95	0.417161	0.610481	LOC_Os02g57120	1
GO:0031321	ascospore-type prospore assembly	1/1602	5/15655	1.95	0.417161	0.610481	LOC_Os10g03400	1
GO:0031322	ascospore-type prospore-specific spindle pole body remodeling	1/1602	5/15655	1.95	0.417161	0.610481	LOC_Os10g03400	1
GO:0031398	positive regulation of protein ubiquitination	1/1602	5/15655	1.95	0.417161	0.610481	LOC_Os03g03920	1
GO:0031537	regulation of anthocyanin metabolic process	1/1602	5/15655	1.95	0.417161	0.610481	LOC_Os07g04730	1
GO:0032409	regulation of transporter activity	1/1602	5/15655	1.95	0.417161	0.610481	LOC_Os03g03920	1
GO:0032410	negative regulation of transporter activity	1/1602	5/15655	1.95	0.417161	0.610481	LOC_Os03g03920	1
GO:0032412	regulation of ion transmembrane transporter activity	1/1602	5/15655	1.95	0.417161	0.610481	LOC_Os03g03920	1
GO:0032413	negative regulation of ion transmembrane transporter activity	1/1602	5/15655	1.95	0.417161	0.610481	LOC_Os03g03920	1
GO:0032505	reproduction of a single-celled organism	1/1602	5/15655	1.95	0.417161	0.610481	LOC_Os10g03400	1
GO:0032878	regulation of establishment or maintenance of cell polarity	1/1602	5/15655	1.95	0.417161	0.610481	LOC_Os10g10580	1
GO:0032990	cell part morphogenesis	1/1602	5/15655	1.95	0.417161	0.610481	LOC_Os09g35620	1
GO:0034330	cell junction organization	1/1602	5/15655	1.95	0.417161	0.610481	LOC_Os09g35620	1
GO:0034440	lipid oxidation	1/1602	5/15655	1.95	0.417161	0.610481	LOC_Os12g37260	1
GO:0034728	nucleosome organization	1/1602	5/15655	1.95	0.417161	0.610481	LOC_Os01g67850	1
GO:0034754	cellular hormone metabolic process	1/1602	5/15655	1.95	0.417161	0.610481	LOC_Os08g04130	1
GO:0034762	regulation of transmembrane transport	1/1602	5/15655	1.95	0.417161	0.610481	LOC_Os03g03920	1
GO:0034763	negative regulation of transmembrane transport	1/1602	5/15655	1.95	0.417161	0.610481	LOC_Os03g03920	1
GO:0034766	negative regulation of ion transmembrane transport	1/1602	5/15655	1.95	0.417161	0.610481	LOC_Os03g03920	1
GO:0042391	regulation of membrane potential	1/1602	5/15655	1.95	0.417161	0.610481	LOC_Os09g35620	1
GO:0043065	positive regulation of apoptotic process	1/1602	5/15655	1.95	0.417161	0.610481	LOC_Os09g35620	1
GO:0043242	negative regulation of protein complex disassembly	1/1602	5/15655	1.95	0.417161	0.610481	LOC_Os02g57120	1
GO:0043244	regulation of protein complex disassembly	1/1602	5/15655	1.95	0.417161	0.610481	LOC_Os02g57120	1
GO:0043271	negative regulation of ion transport	1/1602	5/15655	1.95	0.417161	0.610481	LOC_Os03g03920	1
GO:0043331	response to dsRNA	1/1602	5/15655	1.95	0.417161	0.610481	LOC_Os04g48370	1
GO:0043935	sexual sporulation resulting in formation of a cellular spore	1/1602	5/15655	1.95	0.417161	0.610481	LOC_Os10g03400	1
GO:0045216	cell-cell junction organization	1/1602	5/15655	1.95	0.417161	0.610481	LOC_Os09g35620	1
GO:0045597	positive regulation of cell differentiation	1/1602	5/15655	1.95	0.417161	0.610481	LOC_Os09g35620	1
GO:0045739	positive regulation of DNA repair	1/1602	5/15655	1.95	0.417161	0.610481	LOC_Os01g67850	1
GO:0045910	negative regulation of DNA recombination	1/1602	5/15655	1.95	0.417161	0.610481	LOC_Os01g40980	1
GO:0046168	glycerol-3-phosphate catabolic process	1/1602	5/15655	1.95	0.417161	0.610481	LOC_Os01g58740	1
GO:0046688	response to copper ion	1/1602	5/15655	1.95	0.417161	0.610481	LOC_Os03g16020	1
GO:0046785	microtubule polymerization	1/1602	5/15655	1.95	0.417161	0.610481	LOC_Os02g57120	1
[truncated: 453 more rows]

## Sheet: S6
Table S6 Gene Ontology (GO) Analysis of the differentially expressed genes in Cellular Component Ontology
ID	Description	Gene Ratio	Bg Ratio	Enrich_factor	p value	q value	Gene ID	Count
GO:0016021	integral component of membrane	1094/1953	6978/15042	1.21	4.14922e-20	1.73831e-17	ChrUn.fgenesh.gene.68/ChrUn.fgenesh.gene.73/LOC_Os01g02310/LOC_Os01g02350/LOC_Os01g02360/LOC_Os01g02440/LOC_Os01g02550/LOC_Os01g02570/LOC_Os01g02730/LOC_Os01g02750/LOC_Os01g02770/LOC_Os01g02840/LOC_Os01g02870/LOC_Os01g02930/LOC_Os01g03180/LOC_Os01g03750/LOC_Os01g04409/LOC_Os01g04550/LOC_Os01g04570/LOC_Os01g04990/LOC_Os01g05150/LOC_Os01g05180/LOC_Os01g05310/LOC_Os01g05340/LOC_Os01g05510/LOC_Os01g0…	1094
GO:0005634	nucleus	269/1953	2680/15042	0.77	1	0.981141	LOC_Os01g07260/LOC_Os01g08710/LOC_Os01g08880/LOC_Os01g09080/LOC_Os01g09100/LOC_Os01g09280/LOC_Os01g09450/LOC_Os01g10504/LOC_Os01g13030/LOC_Os01g13300/LOC_Os01g13520/LOC_Os01g14440/LOC_Os01g15520/LOC_Os01g18584/LOC_Os01g40430/LOC_Os01g40980/LOC_Os01g43650/LOC_Os01g48060/LOC_Os01g48130/LOC_Os01g48290/LOC_Os01g48700/LOC_Os01g49160/LOC_Os01g52514/LOC_Os01g53260/LOC_Os01g54890/LOC_Os01g60640/LOC_Os01g…	269
GO:0005737	cytoplasm	159/1953	1431/15042	0.86	0.989085	0.981141	LOC_Os01g01280/LOC_Os01g01650/LOC_Os01g04200/LOC_Os01g07260/LOC_Os01g08760/LOC_Os01g08880/LOC_Os01g25500/LOC_Os01g27360/LOC_Os01g27390/LOC_Os01g27480/LOC_Os01g38359/LOC_Os01g41565/LOC_Os01g48760/LOC_Os01g50760/LOC_Os01g53680/LOC_Os01g54560/LOC_Os01g55510/LOC_Os01g58194/LOC_Os01g62290/LOC_Os01g72710/LOC_Os01g73280/LOC_Os01g73310/LOC_Os01g73450/LOC_Os01g73560/LOC_Os01g73950/LOC_Os02g03400/LOC_Os02g…	159
GO:0005575	cellular_component	151/1953	1788/15042	0.65	1	0.981141	LOC_Os01g01280/LOC_Os01g01650/LOC_Os01g01860/LOC_Os01g04200/LOC_Os01g07260/LOC_Os01g08760/LOC_Os01g08880/LOC_Os01g15520/LOC_Os01g22740/LOC_Os01g24620/LOC_Os01g25500/LOC_Os01g27360/LOC_Os01g32780/LOC_Os01g36600/LOC_Os01g37870/LOC_Os01g42090/LOC_Os01g48760/LOC_Os01g55290/LOC_Os01g57520/LOC_Os01g58194/LOC_Os01g67850/LOC_Os01g72710/LOC_Os01g73280/LOC_Os01g73560/LOC_Os01g73950/LOC_Os02g11720/LOC_Os02g…	151
GO:0044464	cell part	148/1953	1754/15042	0.65	1	0.981141	LOC_Os01g01280/LOC_Os01g01650/LOC_Os01g01860/LOC_Os01g04200/LOC_Os01g07260/LOC_Os01g08760/LOC_Os01g08880/LOC_Os01g15520/LOC_Os01g22740/LOC_Os01g24620/LOC_Os01g25500/LOC_Os01g27360/LOC_Os01g32780/LOC_Os01g36600/LOC_Os01g37870/LOC_Os01g42090/LOC_Os01g48760/LOC_Os01g55290/LOC_Os01g57520/LOC_Os01g58194/LOC_Os01g67850/LOC_Os01g72710/LOC_Os01g73280/LOC_Os01g73560/LOC_Os01g73950/LOC_Os02g11720/LOC_Os02g…	148
GO:0005623	cell	148/1953	1757/15042	0.65	1	0.981141	LOC_Os01g01280/LOC_Os01g01650/LOC_Os01g01860/LOC_Os01g04200/LOC_Os01g07260/LOC_Os01g08760/LOC_Os01g08880/LOC_Os01g15520/LOC_Os01g22740/LOC_Os01g24620/LOC_Os01g25500/LOC_Os01g27360/LOC_Os01g32780/LOC_Os01g36600/LOC_Os01g37870/LOC_Os01g42090/LOC_Os01g48760/LOC_Os01g55290/LOC_Os01g57520/LOC_Os01g58194/LOC_Os01g67850/LOC_Os01g72710/LOC_Os01g73280/LOC_Os01g73560/LOC_Os01g73950/LOC_Os02g11720/LOC_Os02g…	148
GO:0005622	intracellular	135/1953	1641/15042	0.63	1	0.981141	LOC_Os01g01280/LOC_Os01g01650/LOC_Os01g01860/LOC_Os01g04200/LOC_Os01g07260/LOC_Os01g08760/LOC_Os01g08880/LOC_Os01g15520/LOC_Os01g22740/LOC_Os01g24620/LOC_Os01g25500/LOC_Os01g27360/LOC_Os01g36600/LOC_Os01g37870/LOC_Os01g48760/LOC_Os01g55290/LOC_Os01g58194/LOC_Os01g67850/LOC_Os01g72710/LOC_Os01g73280/LOC_Os01g73560/LOC_Os01g73950/LOC_Os02g11720/LOC_Os02g12200/LOC_Os02g30300/LOC_Os02g31160/LOC_Os02g…	135
GO:0044424	intracellular part	122/1953	1285/15042	0.73	0.999978	0.981141	LOC_Os01g01280/LOC_Os01g01650/LOC_Os01g04200/LOC_Os01g07260/LOC_Os01g08760/LOC_Os01g08880/LOC_Os01g15520/LOC_Os01g25500/LOC_Os01g27360/LOC_Os01g36600/LOC_Os01g37870/LOC_Os01g48760/LOC_Os01g55290/LOC_Os01g58194/LOC_Os01g67850/LOC_Os01g72710/LOC_Os01g73280/LOC_Os01g73560/LOC_Os01g73950/LOC_Os02g11720/LOC_Os02g12200/LOC_Os02g30300/LOC_Os02g31160/LOC_Os02g39280/LOC_Os02g42210/LOC_Os02g43770/LOC_Os02g…	122
GO:0043231	intracellular membrane-bounded organelle	118/1953	1205/15042	0.75	0.99984	0.981141	LOC_Os01g01280/LOC_Os01g04200/LOC_Os01g07260/LOC_Os01g08440/LOC_Os01g08880/LOC_Os01g15520/LOC_Os01g25270/LOC_Os01g25500/LOC_Os01g36600/LOC_Os01g37870/LOC_Os01g48640/LOC_Os01g49240/LOC_Os01g53370/LOC_Os01g55290/LOC_Os01g67850/LOC_Os01g72710/LOC_Os01g73280/LOC_Os01g73950/LOC_Os02g11720/LOC_Os02g14680/LOC_Os02g30300/LOC_Os02g31160/LOC_Os02g39280/LOC_Os02g42210/LOC_Os02g43770/LOC_Os02g45760/LOC_Os02g…	118
GO:0005886	plasma membrane	112/1953	705/15042	1.22	0.0124764	0.43558	LOC_Os01g04409/LOC_Os01g26120/LOC_Os01g32780/LOC_Os01g36560/LOC_Os01g42090/LOC_Os01g54510/LOC_Os01g54700/LOC_Os01g55270/LOC_Os01g57520/LOC_Os01g65660/LOC_Os01g70260/LOC_Os01g72950/LOC_Os01g73500/LOC_Os02g11720/LOC_Os02g12450/LOC_Os02g14290/LOC_Os02g31080/LOC_Os02g47010/LOC_Os02g47840/LOC_Os02g51710/LOC_Os02g52930/LOC_Os02g56370/LOC_Os02g57120/LOC_Os03g02830/LOC_Os03g03920/LOC_Os03g05530/LOC_Os03g…	112
GO:0043229	intracellular organelle	104/1953	1116/15042	0.72	0.999966	0.981141	LOC_Os01g01280/LOC_Os01g04200/LOC_Os01g07260/LOC_Os01g08880/LOC_Os01g15520/LOC_Os01g25500/LOC_Os01g36600/LOC_Os01g37870/LOC_Os01g55290/LOC_Os01g67850/LOC_Os01g72710/LOC_Os01g73280/LOC_Os01g73560/LOC_Os01g73950/LOC_Os02g11720/LOC_Os02g12200/LOC_Os02g30300/LOC_Os02g31160/LOC_Os02g39280/LOC_Os02g42210/LOC_Os02g43770/LOC_Os02g45760/LOC_Os02g51350/LOC_Os02g51410/LOC_Os02g51710/LOC_Os02g52220/LOC_Os02g…	104
GO:0043226	organelle	104/1953	1118/15042	0.72	0.999969	0.981141	LOC_Os01g01280/LOC_Os01g04200/LOC_Os01g07260/LOC_Os01g08880/LOC_Os01g15520/LOC_Os01g25500/LOC_Os01g36600/LOC_Os01g37870/LOC_Os01g55290/LOC_Os01g67850/LOC_Os01g72710/LOC_Os01g73280/LOC_Os01g73560/LOC_Os01g73950/LOC_Os02g11720/LOC_Os02g12200/LOC_Os02g30300/LOC_Os02g31160/LOC_Os02g39280/LOC_Os02g42210/LOC_Os02g43770/LOC_Os02g45760/LOC_Os02g51350/LOC_Os02g51410/LOC_Os02g51710/LOC_Os02g52220/LOC_Os02g…	104
GO:0043227	membrane-bounded organelle	100/1953	1078/15042	0.71	0.999963	0.981141	LOC_Os01g01280/LOC_Os01g04200/LOC_Os01g07260/LOC_Os01g08880/LOC_Os01g15520/LOC_Os01g25500/LOC_Os01g36600/LOC_Os01g37870/LOC_Os01g55290/LOC_Os01g67850/LOC_Os01g72710/LOC_Os01g73280/LOC_Os01g73560/LOC_Os01g73950/LOC_Os02g11720/LOC_Os02g30300/LOC_Os02g31160/LOC_Os02g39280/LOC_Os02g42210/LOC_Os02g43770/LOC_Os02g45760/LOC_Os02g51350/LOC_Os02g51410/LOC_Os02g51710/LOC_Os02g52220/LOC_Os02g53530/LOC_Os02g…	100
GO:0016020	membrane	89/1953	732/15042	0.94	0.767795	0.981141	LOC_Os01g12770/LOC_Os01g21520/LOC_Os01g25500/LOC_Os01g27890/LOC_Os01g32780/LOC_Os01g42090/LOC_Os01g52864/LOC_Os01g57520/LOC_Os01g60770/LOC_Os01g72710/LOC_Os01g73280/LOC_Os02g11720/LOC_Os02g26770/LOC_Os02g30100/LOC_Os02g31080/LOC_Os02g42210/LOC_Os02g42810/LOC_Os02g47840/LOC_Os02g51710/LOC_Os02g57120/LOC_Os03g01820/LOC_Os03g03920/LOC_Os03g37411/LOC_Os03g37490/LOC_Os03g50280/LOC_Os03g57200/LOC_Os03g…	89
GO:0005576	extracellular region	69/1953	373/15042	1.42	0.00137055	0.0820269	LOC_Os01g03330/LOC_Os01g03360/LOC_Os01g04040/LOC_Os01g16450/LOC_Os01g19170/LOC_Os01g25500/LOC_Os01g28450/LOC_Os01g28500/LOC_Os01g43160/LOC_Os01g57730/LOC_Os01g60770/LOC_Os01g66830/LOC_Os01g73200/LOC_Os01g74330/LOC_Os02g14430/LOC_Os02g27310/LOC_Os02g47400/LOC_Os02g56570/LOC_Os03g12990/LOC_Os03g13180/LOC_Os03g14050/LOC_Os03g55410/LOC_Os03g57200/LOC_Os03g60840/LOC_Os04g22080/LOC_Os04g37550/LOC_Os04g…	69
GO:0044444	cytoplasmic part	68/1953	675/15042	0.78	0.992402	0.981141	LOC_Os01g01280/LOC_Os01g04200/LOC_Os01g07260/LOC_Os01g08760/LOC_Os01g08880/LOC_Os01g25500/LOC_Os01g48760/LOC_Os01g72710/LOC_Os01g73280/LOC_Os01g73560/LOC_Os01g73950/LOC_Os02g11720/LOC_Os02g39280/LOC_Os02g42210/LOC_Os02g51350/LOC_Os02g51410/LOC_Os02g51710/LOC_Os02g53530/LOC_Os02g57120/LOC_Os03g01730/LOC_Os03g03920/LOC_Os03g11680/LOC_Os03g13690/LOC_Os03g18200/LOC_Os03g19390/LOC_Os03g23050/LOC_Os03g…	68
GO:0009507	chloroplast	63/1953	548/15042	0.89	0.869562	0.981141	LOC_Os01g01280/LOC_Os01g07260/LOC_Os01g08880/LOC_Os01g25500/LOC_Os01g39270/LOC_Os01g44050/LOC_Os01g48990/LOC_Os01g49380/LOC_Os01g51870/LOC_Os01g52250/LOC_Os01g58790/LOC_Os01g64120/LOC_Os01g64960/LOC_Os01g67430/LOC_Os01g72710/LOC_Os02g03670/LOC_Os02g43090/LOC_Os02g51070/LOC_Os02g51410/LOC_Os02g51710/LOC_Os02g51790/LOC_Os02g57100/LOC_Os03g01730/LOC_Os03g06520/LOC_Os03g27770/LOC_Os03g53170/LOC_Os03g…	63
GO:0005829	cytosol	52/1953	544/15042	0.74	0.994983	0.981141	LOC_Os01g06660/LOC_Os01g08760/LOC_Os01g32080/LOC_Os01g48760/LOC_Os01g54560/LOC_Os01g56980/LOC_Os01g62420/LOC_Os01g73280/LOC_Os01g73514/LOC_Os02g20394/LOC_Os02g40010/LOC_Os02g53530/LOC_Os03g03450/LOC_Os03g03920/LOC_Os03g06440/LOC_Os03g11680/LOC_Os03g13300/LOC_Os03g13690/LOC_Os03g19390/LOC_Os03g23050/LOC_Os03g50280/LOC_Os03g57200/LOC_Os03g59610/LOC_Os03g60380/LOC_Os03g62790/LOC_Os03g64070/LOC_Os04g…	52
GO:0009535	chloroplast thylakoid membrane	39/1953	185/15042	1.62	0.00136798	0.0820269	LOC_Os01g14410/LOC_Os01g41710/LOC_Os01g48300/LOC_Os01g57942/LOC_Os01g57945/LOC_Os01g71190/LOC_Os01g72950/LOC_Os02g10390/LOC_Os02g24642/LOC_Os02g51710/LOC_Os02g57030/LOC_Os03g39610/LOC_Os03g56670/LOC_Os04g16770/LOC_Os04g16844/LOC_Os04g16866/LOC_Os04g16872/LOC_Os04g16874/LOC_Os04g43420/LOC_Os05g01675/LOC_Os05g08790/LOC_Os05g22614/LOC_Os05g33280/LOC_Os06g21590/LOC_Os06g46434/LOC_Os06g46435/LOC_Os06g…	39
GO:0071944	cell periphery	37/1953	291/15042	0.98	0.581525	0.940458	LOC_Os01g32780/LOC_Os01g42090/LOC_Os01g57520/LOC_Os02g11720/LOC_Os02g31080/LOC_Os02g47840/LOC_Os02g51710/LOC_Os02g57120/LOC_Os03g03920/LOC_Os03g57200/LOC_Os03g62790/LOC_Os04g01160/LOC_Os04g31340/LOC_Os04g40100/LOC_Os04g47700/LOC_Os04g48160/LOC_Os05g01380/LOC_Os05g06500/LOC_Os05g43690/LOC_Os06g11990/LOC_Os06g16300/LOC_Os06g50960/LOC_Os07g04730/LOC_Os07g05470/LOC_Os07g07760/LOC_Os07g47400/LOC_Os08g…	37
GO:0044446	intracellular organelle part	35/1953	414/15042	0.65	0.99867	0.981141	LOC_Os01g04200/LOC_Os01g07260/LOC_Os01g15520/LOC_Os01g25500/LOC_Os01g67850/LOC_Os01g72710/LOC_Os01g73280/LOC_Os01g73560/LOC_Os02g12200/LOC_Os02g51710/LOC_Os02g57120/LOC_Os03g01730/LOC_Os03g03920/LOC_Os03g18200/LOC_Os03g23050/LOC_Os03g57200/LOC_Os04g33770/LOC_Os04g48160/LOC_Os04g48370/LOC_Os04g58180/LOC_Os05g08790/LOC_Os06g11990/LOC_Os06g16300/LOC_Os06g50880/LOC_Os07g05470/LOC_Os07g07760/LOC_Os07g…	35
GO:0044422	organelle part	35/1953	418/15042	0.64	0.998949	0.981141	LOC_Os01g04200/LOC_Os01g07260/LOC_Os01g15520/LOC_Os01g25500/LOC_Os01g67850/LOC_Os01g72710/LOC_Os01g73280/LOC_Os01g73560/LOC_Os02g12200/LOC_Os02g51710/LOC_Os02g57120/LOC_Os03g01730/LOC_Os03g03920/LOC_Os03g18200/LOC_Os03g23050/LOC_Os03g57200/LOC_Os04g33770/LOC_Os04g48160/LOC_Os04g48370/LOC_Os04g58180/LOC_Os05g08790/LOC_Os06g11990/LOC_Os06g16300/LOC_Os06g50880/LOC_Os07g05470/LOC_Os07g07760/LOC_Os07g…	35
GO:0005840	ribosome	34/1953	316/15042	0.83	0.901084	0.981141	LOC_Os01g25610/LOC_Os01g41030/LOC_Os02g13910/LOC_Os02g27769/LOC_Os02g51790/LOC_Os02g53230/LOC_Os02g53530/LOC_Os03g11680/LOC_Os03g22340/LOC_Os03g37970/LOC_Os03g48840/LOC_Os03g54860/LOC_Os03g61260/LOC_Os04g25540/LOC_Os04g50990/LOC_Os04g52361/LOC_Os06g34780/LOC_Os06g35730/LOC_Os06g51524/LOC_Os06g51530/LOC_Os07g07719/LOC_Os07g07760/LOC_Os07g07770/LOC_Os07g33860/LOC_Os08g06040/LOC_Os08g31219/LOC_Os08g…	34
GO:0009506	plasmodesma	32/1953	178/15042	1.38	0.0340627	0.587092	LOC_Os01g16450/LOC_Os01g57730/LOC_Os01g64470/LOC_Os01g73200/LOC_Os02g11720/LOC_Os02g48780/LOC_Os02g57120/LOC_Os03g13690/LOC_Os03g18200/LOC_Os03g53410/LOC_Os04g46894/LOC_Os04g53630/LOC_Os04g58860/LOC_Os04g59150/LOC_Os04g59200/LOC_Os05g01380/LOC_Os05g43690/LOC_Os06g11990/LOC_Os06g43780/LOC_Os06g50960/LOC_Os07g05470/LOC_Os07g07760/LOC_Os09g37100/LOC_Os10g10580/LOC_Os10g35980/LOC_Os11g05860/LOC_Os11g…	32
GO:0009570	chloroplast stroma	32/1953	182/15042	1.35	0.0445817	0.587092	ChrSy.fgenesh.gene.28/LOC_Os01g01340/LOC_Os01g01710/LOC_Os01g25500/LOC_Os01g48990/LOC_Os01g59090/LOC_Os01g65090/LOC_Os01g66360/LOC_Os01g71190/LOC_Os02g02860/LOC_Os02g07760/LOC_Os02g21520/LOC_Os02g39160/LOC_Os02g45660/LOC_Os03g03450/LOC_Os03g23980/LOC_Os03g36750/LOC_Os03g47610/LOC_Os03g52170/LOC_Os03g57200/LOC_Os03g61260/LOC_Os06g39712/LOC_Os06g46930/LOC_Os07g38230/LOC_Os08g04450/LOC_Os08g15030/LO…	32
GO:0048046	apoplast	30/1953	180/15042	1.28	0.0888651	0.587092	LOC_Os01g18170/LOC_Os01g25500/LOC_Os01g63190/LOC_Os01g65700/LOC_Os02g46910/LOC_Os02g51440/LOC_Os03g48760/LOC_Os03g48770/LOC_Os03g48780/LOC_Os03g57200/LOC_Os04g52720/LOC_Os07g04730/LOC_Os07g42520/LOC_Os07g44920/LOC_Os08g08970/LOC_Os08g08980/LOC_Os08g08990/LOC_Os08g09010/LOC_Os08g09020/LOC_Os08g09040/LOC_Os08g09060/LOC_Os08g09080/LOC_Os11g07830/LOC_Os11g16260/LOC_Os11g42200/LOC_Os12g05840/LOC_Os12g…	30
GO:0005739	mitochondrion	28/1953	339/15042	0.64	0.997799	0.981141	LOC_Os01g04200/LOC_Os01g16900/LOC_Os01g22900/LOC_Os01g25500/LOC_Os01g40820/LOC_Os01g40980/LOC_Os01g44069/LOC_Os01g58010/LOC_Os01g67430/LOC_Os01g72710/LOC_Os01g73280/LOC_Os01g73950/LOC_Os02g02860/LOC_Os02g42210/LOC_Os03g17590/LOC_Os03g58040/LOC_Os04g28310/LOC_Os04g33770/LOC_Os04g53230/LOC_Os05g24660/LOC_Os06g29220/LOC_Os06g50880/LOC_Os07g09060/LOC_Os07g40620/LOC_Os07g44630/LOC_Os08g04450/LOC_Os10g…	28
GO:0005618	cell wall	27/1953	169/15042	1.23	0.147418	0.650109	LOC_Os01g18170/LOC_Os01g60770/LOC_Os01g66830/LOC_Os02g46910/LOC_Os03g48760/LOC_Os03g48770/LOC_Os03g48780/LOC_Os04g31340/LOC_Os04g52720/LOC_Os05g01380/LOC_Os06g50960/LOC_Os07g04730/LOC_Os07g07760/LOC_Os08g08970/LOC_Os08g08980/LOC_Os08g08990/LOC_Os08g09010/LOC_Os08g09020/LOC_Os08g09040/LOC_Os08g09060/LOC_Os08g09080/LOC_Os09g19810/LOC_Os09g29710/LOC_Os10g34290/LOC_Os12g05840/LOC_Os12g05880/Oryza_sat…	27
GO:0012505	endomembrane system	25/1953	205/15042	0.94	0.663553	0.953476	LOC_Os01g73280/LOC_Os01g73560/LOC_Os02g11720/LOC_Os02g39280/LOC_Os02g51710/LOC_Os02g56570/LOC_Os03g03920/LOC_Os03g13860/LOC_Os03g18200/LOC_Os04g46894/LOC_Os04g47700/LOC_Os04g58180/LOC_Os05g01380/LOC_Os06g11740/LOC_Os06g11990/LOC_Os06g33330/LOC_Os06g50960/LOC_Os07g05470/LOC_Os07g47400/LOC_Os09g35620/LOC_Os09g39310/LOC_Os10g10580/LOC_Os10g30520/LOC_Os12g08670/Oryza_sativa_newGene_3643	25
GO:0005794	Golgi apparatus	24/1953	211/15042	0.88	0.786639	0.981141	LOC_Os02g11720/LOC_Os02g17534/LOC_Os02g36770/LOC_Os03g02830/LOC_Os03g08600/LOC_Os03g11110/LOC_Os03g18120/LOC_Os04g58180/LOC_Os05g01380/LOC_Os05g35190/LOC_Os05g37530/LOC_Os05g38360/LOC_Os05g48390/LOC_Os06g11990/LOC_Os06g33330/LOC_Os06g50960/LOC_Os08g24750/LOC_Os10g10580/LOC_Os11g32240/LOC_Os11g47770/LOC_Os12g05550/LOC_Os12g10320/LOC_Os12g36890/Oryza_sativa_newGene_3737	24
GO:0005783	endoplasmic reticulum	24/1953	244/15042	0.76	0.946334	0.981141	LOC_Os01g73280/LOC_Os02g11720/LOC_Os02g39280/LOC_Os02g51710/LOC_Os03g02830/LOC_Os03g03920/LOC_Os03g10310/LOC_Os03g11110/LOC_Os03g18200/LOC_Os03g19452/LOC_Os03g24610/LOC_Os03g58890/LOC_Os04g58390/LOC_Os05g38360/LOC_Os05g41010/LOC_Os05g48390/LOC_Os06g11740/LOC_Os07g47400/LOC_Os09g39310/LOC_Os11g20384/LOC_Os11g32240/LOC_Os12g08670/LOC_Os12g15590/Oryza_sativa_newGene_3737	24
GO:0032991	macromolecular complex	22/1953	220/15042	0.77	0.927449	0.981141	LOC_Os01g07260/LOC_Os01g15520/LOC_Os01g67850/LOC_Os01g73280/LOC_Os02g12200/LOC_Os02g51350/LOC_Os02g53530/LOC_Os03g03920/LOC_Os03g11680/LOC_Os03g23050/LOC_Os04g48160/LOC_Os04g48370/LOC_Os05g45040/LOC_Os06g11990/LOC_Os06g50880/LOC_Os07g07760/LOC_Os08g13130/LOC_Os09g25550/LOC_Os09g35620/LOC_Os11g04600/LOC_Os12g04410/LOC_Os12g16290	22
GO:0009536	plastid	22/1953	242/15042	0.7	0.976492	0.981141	LOC_Os01g01280/LOC_Os01g07260/LOC_Os01g08880/LOC_Os01g25500/LOC_Os01g72710/LOC_Os02g05830/LOC_Os02g51410/LOC_Os02g51710/LOC_Os03g01730/LOC_Os03g53170/LOC_Os03g57200/LOC_Os04g16775/LOC_Os04g54800/LOC_Os05g05600/LOC_Os05g08790/LOC_Os06g12150/LOC_Os07g38230/LOC_Os10g21268/LOC_Os10g38216/LOC_Os10g38930/LOC_Os12g36750/LOC_Os12g42120	22
GO:0009941	chloroplast envelope	20/1953	120/15042	1.28	0.143158	0.63804	ChrSy.fgenesh.gene.28/LOC_Os01g01340/LOC_Os01g07260/LOC_Os01g48990/LOC_Os01g72710/LOC_Os02g39160/LOC_Os03g01730/LOC_Os03g03450/LOC_Os03g23980/LOC_Os03g36750/LOC_Os03g61260/LOC_Os04g43420/LOC_Os05g22614/LOC_Os06g46930/LOC_Os07g40620/LOC_Os08g04450/LOC_Os08g37380/LOC_Os12g02589/LOC_Os12g08170/Oryza_sativa_newGene_2305	20
GO:0009523	photosystem II	19/1953	34/15042	4.3	3.4837e-09	7.29742e-07	LOC_Os01g41710/LOC_Os02g10390/LOC_Os02g24632/LOC_Os02g24634/LOC_Os03g22370/LOC_Os03g39610/LOC_Os04g16770/LOC_Os04g16872/LOC_Os04g16874/LOC_Os05g43310/LOC_Os06g21590/LOC_Os06g39708/LOC_Os07g38960/LOC_Os08g33820/LOC_Os08g35420/LOC_Os09g17740/LOC_Os10g21212/LOC_Os10g41689/LOC_Os11g13890	19
GO:0005911	cell-cell junction	18/1953	84/15042	1.65	0.0208782	0.485938	LOC_Os02g11720/LOC_Os02g57120/LOC_Os03g13690/LOC_Os03g18200/LOC_Os04g46894/LOC_Os05g01380/LOC_Os05g43690/LOC_Os06g11990/LOC_Os06g50960/LOC_Os07g05470/LOC_Os07g07760/LOC_Os09g35620/LOC_Os10g10580/LOC_Os12g16220/LOC_Os12g16240/LOC_Os12g16250/Oryza_sativa_newGene_3279/Oryza_sativa_newGene_3643	18
GO:0030054	cell junction	18/1953	87/15042	1.59	0.0290415	0.579374	LOC_Os02g11720/LOC_Os02g57120/LOC_Os03g13690/LOC_Os03g18200/LOC_Os04g46894/LOC_Os05g01380/LOC_Os05g43690/LOC_Os06g11990/LOC_Os06g50960/LOC_Os07g05470/LOC_Os07g07760/LOC_Os09g35620/LOC_Os10g10580/LOC_Os12g16220/LOC_Os12g16240/LOC_Os12g16250/Oryza_sativa_newGene_3279/Oryza_sativa_newGene_3643	18
GO:0043228	non-membrane-bounded organelle	18/1953	165/15042	0.84	0.81848	0.981141	LOC_Os01g07260/LOC_Os01g15520/LOC_Os01g67850/LOC_Os01g73560/LOC_Os02g12200/LOC_Os02g53530/LOC_Os02g57120/LOC_Os03g11680/LOC_Os03g23050/LOC_Os04g48160/LOC_Os05g08790/LOC_Os06g11990/LOC_Os07g05470/LOC_Os07g07760/LOC_Os09g35620/LOC_Os10g36650/LOC_Os12g40260/Oryza_sativa_newGene_3643	18
GO:0043232	intracellular non-membrane-bounded organelle	18/1953	165/15042	0.84	0.81848	0.981141	LOC_Os01g07260/LOC_Os01g15520/LOC_Os01g67850/LOC_Os01g73560/LOC_Os02g12200/LOC_Os02g53530/LOC_Os02g57120/LOC_Os03g11680/LOC_Os03g23050/LOC_Os04g48160/LOC_Os05g08790/LOC_Os06g11990/LOC_Os07g05470/LOC_Os07g07760/LOC_Os09g35620/LOC_Os10g36650/LOC_Os12g40260/Oryza_sativa_newGene_3643	18
GO:0055044	symplast	17/1953	80/15042	1.64	0.0262138	0.578011	LOC_Os02g11720/LOC_Os02g57120/LOC_Os03g13690/LOC_Os03g18200/LOC_Os04g46894/LOC_Os05g01380/LOC_Os05g43690/LOC_Os06g11990/LOC_Os06g50960/LOC_Os07g05470/LOC_Os07g07760/LOC_Os10g10580/LOC_Os12g16220/LOC_Os12g16240/LOC_Os12g16250/Oryza_sativa_newGene_3279/Oryza_sativa_newGene_3643	17
GO:0000139	Golgi membrane	17/1953	117/15042	1.12	0.348115	0.865346	LOC_Os01g52710/LOC_Os02g06840/LOC_Os02g22480/LOC_Os02g29530/LOC_Os03g03730/LOC_Os03g63280/LOC_Os04g01280/LOC_Os05g11060/LOC_Os05g24580/LOC_Os05g35266/LOC_Os05g47880/LOC_Os06g51160/LOC_Os07g39990/LOC_Os09g26300/LOC_Os09g28610/LOC_Os10g13810/LOC_Os12g16480	17
GO:0009505	plant-type cell wall	15/1953	76/15042	1.52	0.0623138	0.587092	LOC_Os01g16450/LOC_Os01g57730/LOC_Os01g73200/LOC_Os01g74330/LOC_Os02g47400/LOC_Os04g31340/LOC_Os04g53630/LOC_Os04g59150/LOC_Os04g59200/LOC_Os05g01380/LOC_Os06g08090/LOC_Os06g50960/LOC_Os07g44070/LOC_Os12g38920/Oryza_sativa_newGene_3279	15
GO:0005773	vacuole	15/1953	111/15042	1.04	0.476204	0.872179	LOC_Os02g42310/LOC_Os02g51710/LOC_Os03g03920/LOC_Os03g18200/LOC_Os03g57200/LOC_Os03g63250/LOC_Os05g02060/LOC_Os07g04730/LOC_Os07g07760/LOC_Os07g47400/LOC_Os09g19810/LOC_Os09g37100/LOC_Os10g10580/LOC_Os10g34290/LOC_Os11g05470	15
GO:0046658	anchored component of plasma membrane	14/1953	92/15042	1.17	0.304113	0.85582	LOC_Os01g64470/LOC_Os01g71380/LOC_Os01g71830/LOC_Os02g53200/LOC_Os03g25790/LOC_Os03g51240/LOC_Os04g58860/LOC_Os05g41610/LOC_Os05g43690/LOC_Os07g35510/LOC_Os08g04340/LOC_Os11g05860/LOC_Os11g47820/Oryza_sativa_newGene_3279	14
GO:0031974	membrane-enclosed lumen	14/1953	150/15042	0.72	0.933158	0.981141	LOC_Os01g04200/LOC_Os01g07260/LOC_Os01g15520/LOC_Os01g73280/LOC_Os03g03920/LOC_Os03g18200/LOC_Os03g23050/LOC_Os04g48370/LOC_Os05g08790/LOC_Os06g16300/LOC_Os06g50880/LOC_Os07g07760/LOC_Os09g25550/LOC_Os09g35620	14
GO:0043233	organelle lumen	14/1953	150/15042	0.72	0.933158	0.981141	LOC_Os01g04200/LOC_Os01g07260/LOC_Os01g15520/LOC_Os01g73280/LOC_Os03g03920/LOC_Os03g18200/LOC_Os03g23050/LOC_Os04g48370/LOC_Os05g08790/LOC_Os06g16300/LOC_Os06g50880/LOC_Os07g07760/LOC_Os09g25550/LOC_Os09g35620	14
GO:0070013	intracellular organelle lumen	14/1953	150/15042	0.72	0.933158	0.981141	LOC_Os01g04200/LOC_Os01g07260/LOC_Os01g15520/LOC_Os01g73280/LOC_Os03g03920/LOC_Os03g18200/LOC_Os03g23050/LOC_Os04g48370/LOC_Os05g08790/LOC_Os06g16300/LOC_Os06g50880/LOC_Os07g07760/LOC_Os09g25550/LOC_Os09g35620	14
GO:0009522	photosystem I	13/1953	30/15042	3.34	3.98371e-05	0.00333793	LOC_Os01g41710/LOC_Os02g10390/LOC_Os03g39610/LOC_Os05g01675/LOC_Os06g21590/LOC_Os06g46436/LOC_Os07g22498/LOC_Os07g38960/LOC_Os08g33820/LOC_Os09g17740/LOC_Os10g38234/LOC_Os11g13890/LOC_Os12g08770	13
GO:0000145	exocyst	13/1953	82/15042	1.22	0.26247	0.85582	LOC_Os01g51880/LOC_Os01g56220/LOC_Os02g36619/LOC_Os03g06760/LOC_Os04g58870/LOC_Os05g30700/LOC_Os06g08460/LOC_Os06g33170/LOC_Os07g10940/LOC_Os08g13270/LOC_Os09g17810/LOC_Os11g01050/LOC_Os11g05880	13
GO:0044428	nuclear part	13/1953	162/15042	0.62	0.98276	0.981141	LOC_Os01g07260/LOC_Os01g15520/LOC_Os01g73280/LOC_Os03g03920/LOC_Os03g23050/LOC_Os04g48370/LOC_Os05g08790/LOC_Os06g16300/LOC_Os06g50880/LOC_Os07g07760/LOC_Os09g25550/LOC_Os09g35620/LOC_Os11g39710	13
GO:0031981	nuclear lumen	12/1953	141/15042	0.66	0.963089	0.981141	LOC_Os01g07260/LOC_Os01g15520/LOC_Os01g73280/LOC_Os03g03920/LOC_Os03g23050/LOC_Os04g48370/LOC_Os05g08790/LOC_Os06g16300/LOC_Os06g50880/LOC_Os07g07760/LOC_Os09g25550/LOC_Os09g35620	12
GO:0005789	endoplasmic reticulum membrane	12/1953	163/15042	0.57	0.992167	0.981141	LOC_Os01g63240/LOC_Os01g73280/LOC_Os02g44300/LOC_Os03g01820/LOC_Os06g41590/LOC_Os06g43700/LOC_Os09g28610/LOC_Os09g31970/LOC_Os09g32968/LOC_Os09g39310/LOC_Os12g08670/LOC_Os12g16720	12
GO:0005856	cytoskeleton	11/1953	87/15042	0.97	0.585896	0.940458	LOC_Os01g73310/LOC_Os01g73560/LOC_Os02g12200/LOC_Os02g57120/LOC_Os04g48160/LOC_Os06g11990/LOC_Os07g05470/LOC_Os09g35620/LOC_Os10g36650/LOC_Os12g40260/Oryza_sativa_newGene_3643	11
GO:1990234	transferase complex	11/1953	89/15042	0.95	0.617302	0.944646	LOC_Os01g67850/LOC_Os01g73280/LOC_Os02g51350/LOC_Os04g48370/LOC_Os05g45040/LOC_Os06g11990/LOC_Os06g50880/LOC_Os08g13130/LOC_Os09g25550/LOC_Os11g04600/LOC_Os12g04410	11
GO:1902494	catalytic complex	11/1953	102/15042	0.83	0.787748	0.981141	LOC_Os01g67850/LOC_Os01g73280/LOC_Os02g51350/LOC_Os04g48370/LOC_Os05g45040/LOC_Os06g11990/LOC_Os06g50880/LOC_Os08g13130/LOC_Os09g25550/LOC_Os11g04600/LOC_Os12g04410	11
GO:0042025	host cell nucleus	11/1953	172/15042	0.49	0.998337	0.981141	LOC_Os01g69830/LOC_Os03g06630/LOC_Os03g10650/LOC_Os03g24040/LOC_Os03g25120/LOC_Os04g18090/LOC_Os04g40630/LOC_Os04g41040/LOC_Os08g32540/LOC_Os08g33340/LOC_Os12g20324	11
GO:0005874	microtubule	10/1953	84/15042	0.92	0.664603	0.953476	LOC_Os01g55510/LOC_Os02g57120/LOC_Os03g51600/LOC_Os03g64415/LOC_Os04g42330/LOC_Os05g34170/LOC_Os06g11990/LOC_Os07g05470/LOC_Os12g42160/Oryza_sativa_newGene_3643	10
GO:0005774	vacuolar membrane	10/1953	99/15042	0.78	0.843406	0.981141	LOC_Os01g37690/LOC_Os02g51710/LOC_Os03g57200/LOC_Os04g47780/LOC_Os06g43700/LOC_Os07g07760/LOC_Os07g40620/LOC_Os09g31270/LOC_Os10g10580/LOC_Os11g32260	10
GO:0031090	organelle membrane	10/1953	101/15042	0.76	0.8603	0.981141	LOC_Os01g72710/LOC_Os01g73280/LOC_Os02g51710/LOC_Os03g57200/LOC_Os04g33770/LOC_Os04g58180/LOC_Os07g07760/LOC_Os09g35620/LOC_Os10g10580/LOC_Os12g08670	10
GO:0005654	nucleoplasm	10/1953	113/15042	0.68	0.933325	0.981141	LOC_Os01g15520/LOC_Os01g73280/LOC_Os03g03920/LOC_Os04g48370/LOC_Os06g16300/LOC_Os06g50880/LOC_Os07g44630/LOC_Os08g33340/LOC_Os09g25550/LOC_Os09g35620	10
GO:0044430	cytoskeletal part	9/1953	58/15042	1.2	0.337171	0.85582	LOC_Os01g73560/LOC_Os02g12200/LOC_Os02g57120/LOC_Os04g48160/LOC_Os06g11990/LOC_Os07g05470/LOC_Os09g35620/LOC_Os12g40260/Oryza_sativa_newGene_3643	9
GO:0031410	cytoplasmic vesicle	9/1953	60/15042	1.16	0.375757	0.872179	LOC_Os01g73560/LOC_Os03g63250/LOC_Os04g47700/LOC_Os04g58180/LOC_Os07g05470/LOC_Os09g35620/LOC_Os10g10580/LOC_Os12g08670/Oryza_sativa_newGene_3643	9
GO:0031982	vesicle	9/1953	60/15042	1.16	0.375757	0.872179	LOC_Os01g73560/LOC_Os04g47700/LOC_Os04g58180/LOC_Os07g05470/LOC_Os09g35620/LOC_Os10g10580/LOC_Os11g05470/LOC_Os12g08670/Oryza_sativa_newGene_3643	9
GO:0005615	extracellular space	9/1953	63/15042	1.1	0.434117	0.872179	LOC_Os01g24560/LOC_Os01g42790/LOC_Os03g41438/LOC_Os04g13140/LOC_Os07g03319/LOC_Os07g03409/LOC_Os07g03467/LOC_Os11g11500/LOC_Os11g23770	9
GO:0098805	whole membrane	9/1953	75/15042	0.92	0.651851	0.953476	LOC_Os01g73280/LOC_Os02g51710/LOC_Os03g57200/LOC_Os04g33770/LOC_Os04g58180/LOC_Os07g07760/LOC_Os09g35620/LOC_Os10g10580/LOC_Os12g08670	9
GO:0005694	chromosome	9/1953	80/15042	0.87	0.72696	0.981141	LOC_Os01g07260/LOC_Os01g67850/LOC_Os01g70220/LOC_Os03g23050/LOC_Os08g30910/LOC_Os08g45130/LOC_Os09g35620/LOC_Os12g42760/Oryza_sativa_newGene_2554	9
GO:0044425	membrane part	9/1953	127/15042	0.55	0.98834	0.981141	LOC_Os01g42090/LOC_Os01g73280/LOC_Os05g43690/LOC_Os06g11990/LOC_Os09g35620/LOC_Os09g39310/LOC_Os12g08670/LOC_Os12g13730/Oryza_sativa_newGene_3279	9
GO:0015630	microtubule cytoskeleton	8/1953	50/15042	1.23	0.320281	0.85582	LOC_Os01g73560/LOC_Os02g12200/LOC_Os02g57120/LOC_Os04g48160/LOC_Os06g11990/LOC_Os07g05470/LOC_Os09g35620/Oryza_sativa_newGene_3643	8
GO:0097708	intracellular vesicle	8/1953	53/15042	1.16	0.382024	0.872179	LOC_Os01g73560/LOC_Os04g47700/LOC_Os04g58180/LOC_Os07g05470/LOC_Os09g35620/LOC_Os10g10580/LOC_Os12g08670/Oryza_sativa_newGene_3643	8
GO:0030312	external encapsulating structure	8/1953	60/15042	1.03	0.525487	0.905972	LOC_Os04g31340/LOC_Os05g01380/LOC_Os06g50960/LOC_Os07g04730/LOC_Os07g07760/LOC_Os09g19810/LOC_Os10g34290/Oryza_sativa_newGene_3279	8
GO:0098588	bounding membrane of organelle	8/1953	73/15042	0.84	0.74768	0.981141	LOC_Os01g73280/LOC_Os02g51710/LOC_Os03g57200/LOC_Os04g33770/LOC_Os04g58180/LOC_Os07g07760/LOC_Os10g10580/LOC_Os12g08670	8
GO:0000151	ubiquitin ligase complex	8/1953	83/15042	0.74	0.860468	0.981141	LOC_Os01g67850/LOC_Os01g73280/LOC_Os02g51350/LOC_Os05g45040/LOC_Os06g50880/LOC_Os08g13130/LOC_Os11g04600/LOC_Os12g04410	8
GO:0044434	chloroplast part	8/1953	105/15042	0.59	0.970603	0.981141	LOC_Os01g07260/LOC_Os01g25500/LOC_Os01g72710/LOC_Os02g51710/LOC_Os03g01730/LOC_Os03g57200/LOC_Os05g08790/LOC_Os07g38230	8
GO:0044435	plastid part	8/1953	107/15042	0.58	0.974848	0.981141	LOC_Os01g07260/LOC_Os01g25500/LOC_Os01g72710/LOC_Os02g51710/LOC_Os03g01730/LOC_Os03g57200/LOC_Os05g08790/LOC_Os07g38230	8
GO:0005730	nucleolus	8/1953	130/15042	0.47	0.996343	0.981141	LOC_Os01g15520/LOC_Os01g68104/LOC_Os03g23050/LOC_Os03g61260/LOC_Os06g45330/LOC_Os07g07760/LOC_Os08g02360/LOC_Os12g14110	8
GO:0009654	photosystem II oxygen evolving complex	7/1953	25/15042	2.16	0.0355484	0.587092	LOC_Os01g59090/LOC_Os01g71190/LOC_Os02g36850/LOC_Os07g04840/LOC_Os07g05360/LOC_Os08g40160/LOC_Os10g32400	7
GO:0005759	mitochondrial matrix	7/1953	46/15042	1.17	0.388656	0.872179	LOC_Os01g04200/LOC_Os02g07760/LOC_Os04g10400/LOC_Os05g49300/LOC_Os06g01630/LOC_Os07g44330/LOC_Os07g48960	7
GO:0099503	secretory vesicle	6/1953	6/15042	7.7	4.75855e-06	0.000664527	LOC_Os01g73560/LOC_Os04g47700/LOC_Os07g05470/LOC_Os09g35620/LOC_Os12g08670/Oryza_sativa_newGene_3643	6
GO:0005938	cell cortex	6/1953	17/15042	2.72	0.0164495	0.43933	LOC_Os02g57120/LOC_Os06g11990/LOC_Os07g05470/LOC_Os09g35620/LOC_Os12g40260/Oryza_sativa_newGene_3643	6
GO:0099568	cytoplasmic region	6/1953	19/15042	2.43	0.0287373	0.579374	LOC_Os02g57120/LOC_Os06g11990/LOC_Os07g05470/LOC_Os09g35620/LOC_Os12g40260/Oryza_sativa_newGene_3643	6
GO:0019898	extrinsic component of membrane	6/1953	39/15042	1.18	0.39571	0.872179	LOC_Os01g59090/LOC_Os02g36850/LOC_Os07g04840/LOC_Os08g40160/LOC_Os09g35620/LOC_Os10g32400	6
GO:0005887	integral component of plasma membrane	6/1953	50/15042	0.92	0.645354	0.953476	LOC_Os01g42090/LOC_Os02g36450/LOC_Os03g54100/LOC_Os03g62200/LOC_Os07g39010/LOC_Os09g06499	6
GO:0031967	organelle envelope	6/1953	81/15042	0.57	0.960809	0.981141	LOC_Os01g07260/LOC_Os01g72710/LOC_Os01g73280/LOC_Os03g01730/LOC_Os04g33770/LOC_Os09g35620	6
GO:0031975	envelope	6/1953	81/15042	0.57	0.960809	0.981141	LOC_Os01g07260/LOC_Os01g72710/LOC_Os01g73280/LOC_Os03g01730/LOC_Os04g33770/LOC_Os09g35620	6
GO:0031224	intrinsic component of membrane	6/1953	84/15042	0.55	0.969544	0.981141	LOC_Os01g42090/LOC_Os01g73280/LOC_Os05g43690/LOC_Os12g08670/LOC_Os12g13730/Oryza_sativa_newGene_3279	6
GO:0031984	organelle subcompartment	6/1953	86/15042	0.54	0.974332	0.981141	LOC_Os01g73280/LOC_Os02g51710/LOC_Os04g58180/LOC_Os05g08790/LOC_Os09g39310/LOC_Os12g08670	6
GO:0030141	secretory granule	5/1953	5/15042	7.7	3.67322e-05	0.00333793	LOC_Os01g73560/LOC_Os04g47700/LOC_Os07g05470/LOC_Os09g35620/Oryza_sativa_newGene_3643	5
GO:0000790	nuclear chromatin	5/1953	19/15042	2.03	0.0899151	0.587092	LOC_Os01g07260/LOC_Os03g05100/LOC_Os03g23050/LOC_Os07g36130/LOC_Os09g35620	5
GO:0099513	polymeric cytoskeletal fiber	5/1953	25/15042	1.54	0.217368	0.840744	LOC_Os02g57120/LOC_Os06g11990/LOC_Os07g05470/LOC_Os09g35620/Oryza_sativa_newGene_3643	5
GO:0099080	supramolecular complex	5/1953	29/15042	1.33	0.321724	0.85582	LOC_Os02g57120/LOC_Os06g11990/LOC_Os07g05470/LOC_Os09g35620/Oryza_sativa_newGene_3643	5
GO:0099081	supramolecular polymer	5/1953	29/15042	1.33	0.321724	0.85582	LOC_Os02g57120/LOC_Os06g11990/LOC_Os07g05470/LOC_Os09g35620/Oryza_sativa_newGene_3643	5
GO:0099512	supramolecular fiber	5/1953	29/15042	1.33	0.321724	0.85582	LOC_Os02g57120/LOC_Os06g11990/LOC_Os07g05470/LOC_Os09g35620/Oryza_sativa_newGene_3643	5
GO:0022625	cytosolic large ribosomal subunit	5/1953	39/15042	0.99	0.583732	0.940458	LOC_Os01g59730/LOC_Os03g54860/LOC_Os06g46930/LOC_Os11g04070/LOC_Os12g03880	5
GO:0019005	SCF ubiquitin ligase complex	5/1953	41/15042	0.94	0.629702	0.952391	LOC_Os02g51350/LOC_Os02g55540/LOC_Os08g13130/LOC_Os11g04600/LOC_Os12g04410	5
GO:0015935	small ribosomal subunit	5/1953	48/15042	0.8	0.764332	0.981141	LOC_Os04g16818/LOC_Os07g07760/LOC_Os07g10660/LOC_Os07g43510/LOC_Os11g38959	5
GO:0009534	chloroplast thylakoid	5/1953	52/15042	0.74	0.822651	0.981141	LOC_Os01g59090/LOC_Os02g51710/LOC_Os05g04220/LOC_Os05g08790/LOC_Os12g08170	5
GO:0044459	plasma membrane part	5/1953	53/15042	0.73	0.835254	0.981141	LOC_Os01g42090/LOC_Os05g43690/LOC_Os06g11990/LOC_Os09g35620/Oryza_sativa_newGene_3279	5
GO:0031461	cullin-RING ubiquitin ligase complex	5/1953	60/15042	0.64	0.904239	0.981141	LOC_Os02g51350/LOC_Os06g50880/LOC_Os08g13130/LOC_Os11g04600/LOC_Os12g04410	5
GO:1990904	ribonucleoprotein complex	5/1953	82/15042	0.47	0.986269	0.981141	LOC_Os02g53530/LOC_Os03g11680/LOC_Os07g07760/LOC_Os11g14300/LOC_Os12g16290	5
GO:0055028	cortical microtubule	4/1953	7/15042	4.4	0.00715484	0.2725	LOC_Os05g36960/LOC_Os06g11990/LOC_Os07g05470/Oryza_sativa_newGene_3643	4
GO:0030863	cortical cytoskeleton	4/1953	11/15042	2.8	0.043994	0.587092	LOC_Os06g11990/LOC_Os07g05470/LOC_Os12g40260/Oryza_sativa_newGene_3643	4
GO:0044448	cell cortex part	4/1953	11/15042	2.8	0.043994	0.587092	LOC_Os06g11990/LOC_Os07g05470/LOC_Os12g40260/Oryza_sativa_newGene_3643	4
GO:0048471	perinuclear region of cytoplasm	4/1953	14/15042	2.2	0.0974837	0.587092	LOC_Os01g72350/LOC_Os03g03920/LOC_Os04g58180/LOC_Os09g35620	4
GO:0005667	transcription factor complex	4/1953	17/15042	1.81	0.170341	0.735709	LOC_Os01g48700/LOC_Os09g25550/LOC_Os09g35620/LOC_Os10g29660	4
GO:0009524	phragmoplast	4/1953	17/15042	1.81	0.170341	0.735709	LOC_Os02g57120/LOC_Os03g55140/LOC_Os07g05470/Oryza_sativa_newGene_3643	4
GO:0005811	lipid droplet	4/1953	19/15042	1.62	0.22672	0.840744	LOC_Os11g08569/LOC_Os11g18194/LOC_Os11g18366/LOC_Os11g35710	4
GO:0005764	lysosome	4/1953	20/15042	1.54	0.256485	0.85582	LOC_Os01g24560/LOC_Os01g42790/LOC_Os04g13140/LOC_Os11g23770	4
GO:0032580	Golgi cisterna membrane	4/1953	20/15042	1.54	0.256485	0.85582	LOC_Os02g17534/LOC_Os02g25630/LOC_Os02g52560/LOC_Os08g24750	4
GO:0015629	actin cytoskeleton	4/1953	23/15042	1.34	0.349074	0.865346	LOC_Os05g06110/LOC_Os10g22570/LOC_Os12g40260/LOC_Os12g43340	4
GO:0005769	early endosome	4/1953	24/15042	1.28	0.380274	0.872179	LOC_Os04g30450/LOC_Os05g35060/LOC_Os06g50180/LOC_Os11g09140	4
GO:0000785	chromatin	4/1953	27/15042	1.14	0.472172	0.872179	LOC_Os01g07260/LOC_Os03g23050/LOC_Os04g34976/LOC_Os09g35620	4
GO:0022627	cytosolic small ribosomal subunit	4/1953	28/15042	1.1	0.501722	0.872179	LOC_Os03g63950/LOC_Os07g07760/LOC_Os07g42450/LOC_Os07g43510	4
GO:0044432	endoplasmic reticulum part	4/1953	33/15042	0.93	0.636536	0.953476	LOC_Os01g73280/LOC_Os03g18200/LOC_Os09g39310/LOC_Os12g08670	4
GO:0044427	chromosomal part	4/1953	36/15042	0.86	0.705034	0.981141	LOC_Os01g07260/LOC_Os01g67850/LOC_Os03g23050/LOC_Os09g35620	4
GO:0044437	vacuolar part	4/1953	43/15042	0.72	0.827157	0.981141	LOC_Os02g51710/LOC_Os03g57200/LOC_Os07g07760/LOC_Os10g10580	4
GO:0031225	anchored component of membrane	4/1953	51/15042	0.6	0.912129	0.981141	LOC_Os03g18910/LOC_Os05g43690/LOC_Os07g41310/Oryza_sativa_newGene_3279	4
GO:0009532	plastid stroma	4/1953	54/15042	0.57	0.932818	0.981141	LOC_Os01g25500/LOC_Os03g57200/LOC_Os05g08790/LOC_Os07g38230	4
GO:0009579	thylakoid	4/1953	64/15042	0.48	0.97381	0.981141	LOC_Os01g01280/LOC_Os02g51710/LOC_Os03g63010/LOC_Os05g08790	4
GO:0001669	acrosomal vesicle	3/1953	3/15042	7.7	0.00218579	0.0915733	LOC_Os01g73560/LOC_Os07g05470/Oryza_sativa_newGene_3643	3
GO:0002177	manchette	3/1953	3/15042	7.7	0.00218579	0.0915733	LOC_Os01g73560/LOC_Os07g05470/Oryza_sativa_newGene_3643	3
GO:0097223	sperm part	3/1953	3/15042	7.7	0.00218579	0.0915733	LOC_Os01g73560/LOC_Os07g05470/Oryza_sativa_newGene_3643	3
GO:0030139	endocytic vesicle	3/1953	5/15042	4.62	0.0178271	0.43933	LOC_Os09g35620/LOC_Os10g10580/LOC_Os10g30520	3
GO:0030981	cortical microtubule cytoskeleton	3/1953	7/15042	3.3	0.0510485	0.587092	LOC_Os06g11990/LOC_Os07g05470/Oryza_sativa_newGene_3643	3
GO:0005881	cytoplasmic microtubule	3/1953	10/15042	2.31	0.130326	0.587092	LOC_Os06g11990/LOC_Os07g05470/Oryza_sativa_newGene_3643	3
GO:0042644	chloroplast nucleoid	3/1953	15/15042	1.54	0.307633	0.85582	LOC_Os04g43420/LOC_Os05g22614/LOC_Os11g23790	3
GO:0044433	cytoplasmic vesicle part	3/1953	17/15042	1.36	0.382837	0.872179	LOC_Os04g58180/LOC_Os09g35620/LOC_Os12g08670	3
GO:0044445	cytosolic part	3/1953	17/15042	1.36	0.382837	0.872179	LOC_Os02g53530/LOC_Os03g11680/LOC_Os07g07760	3
GO:0045261	proton-transporting ATP synthase complex, catalytic core F(1)	3/1953	19/15042	1.22	0.456027	0.872179	LOC_Os03g55874/LOC_Os07g32880/LOC_Os12g10570	3
GO:0031977	thylakoid lumen	3/1953	20/15042	1.16	0.49124	0.872179	LOC_Os01g01280/LOC_Os01g59090/LOC_Os05g33280	3
GO:0044454	nuclear chromosome part	3/1953	21/15042	1.1	0.525287	0.905972	LOC_Os01g07260/LOC_Os03g23050/LOC_Os09g35620	3
GO:0022626	cytosolic ribosome	3/1953	22/15042	1.05	0.558033	0.919003	LOC_Os02g53530/LOC_Os03g11680/LOC_Os07g07760	3
GO:0005819	spindle	3/1953	23/15042	1	0.589377	0.942435	LOC_Os02g03400/LOC_Os02g57120/LOC_Os09g27700	3
GO:0044429	mitochondrial part	3/1953	25/15042	0.92	0.647605	0.953476	LOC_Os01g04200/LOC_Os01g73280/LOC_Os04g33770	3
GO:0000228	nuclear chromosome	3/1953	27/15042	0.86	0.699706	0.981141	LOC_Os01g07260/LOC_Os03g23050/LOC_Os09g35620	3
GO:0031966	mitochondrial membrane	3/1953	27/15042	0.86	0.699706	0.981141	LOC_Os01g73280/LOC_Os01g74640/LOC_Os04g33770	3
GO:0005681	spliceosomal complex	3/1953	30/15042	0.77	0.766533	0.981141	LOC_Os02g08090/LOC_Os03g49430/LOC_Os04g31950	3
GO:0098827	endoplasmic reticulum subcompartment	3/1953	30/15042	0.77	0.766533	0.981141	LOC_Os01g73280/LOC_Os09g39310/LOC_Os12g08670	3
GO:0042175	nuclear outer membrane-endoplasmic reticulum membrane network	3/1953	31/15042	0.75	0.785929	0.981141	LOC_Os01g73280/LOC_Os09g39310/LOC_Os12g08670	3
GO:0044436	thylakoid part	3/1953	39/15042	0.59	0.897478	0.981141	LOC_Os01g01280/LOC_Os02g51710/LOC_Os05g08790	3
GO:0031226	intrinsic component of plasma membrane	3/1953	42/15042	0.55	0.923471	0.981141	LOC_Os01g42090/LOC_Os05g43690/Oryza_sativa_newGene_3279	3
GO:0042651	thylakoid membrane	3/1953	43/15042	0.54	0.930695	0.981141	LOC_Os02g51710/LOC_Os05g08790/LOC_Os10g38216	3
GO:0044451	nucleoplasm part	3/1953	46/15042	0.5	0.948762	0.981141	LOC_Os01g15520/LOC_Os04g48370/LOC_Os09g25550	3
GO:0009526	plastid envelope	3/1953	49/15042	0.47	0.962359	0.981141	LOC_Os01g07260/LOC_Os01g72710/LOC_Os03g01730	3
GO:0005768	endosome	3/1953	73/15042	0.32	0.997301	0.981141	LOC_Os04g58180/LOC_Os10g30520/LOC_Os12g08670	3
GO:0005731	nucleolus organizer region	2/1953	2/15042	7.7	0.01685	0.43933	LOC_Os03g23050/LOC_Os03g58600	2
GO:0070382	exocytic vesicle	2/1953	2/15042	7.7	0.01685	0.43933	LOC_Os09g35620/LOC_Os12g08670	2
GO:0098562	cytoplasmic side of membrane	2/1953	2/15042	7.7	0.01685	0.43933	LOC_Os06g11990/LOC_Os09g35620	2
GO:0009538	photosystem I reaction center	2/1953	3/15042	5.13	0.0461784	0.587092	LOC_Os03g56670/LOC_Os07g25430	2
GO:0030133	transport vesicle	2/1953	3/15042	5.13	0.0461784	0.587092	LOC_Os09g35620/LOC_Os12g08670	2
GO:0098552	side of membrane	2/1953	3/15042	5.13	0.0461784	0.587092	LOC_Os06g11990/LOC_Os09g35620	2
GO:0009898	cytoplasmic side of plasma membrane	2/1953	4/15042	3.85	0.0844639	0.587092	LOC_Os06g11990/LOC_Os09g35620	2
GO:0098807	chloroplast thylakoid membrane protein complex	2/1953	4/15042	3.85	0.0844639	0.587092	LOC_Os01g01340/LOC_Os06g01850	2
GO:0009543	chloroplast thylakoid lumen	2/1953	5/15042	3.08	0.128888	0.587092	LOC_Os02g02550/LOC_Os12g42210	2
GO:0009574	preprophase band	2/1953	5/15042	3.08	0.128888	0.587092	LOC_Os07g05470/Oryza_sativa_newGene_3643	2
GO:0045202	synapse	2/1953	5/15042	3.08	0.128888	0.587092	LOC_Os09g35620/LOC_Os12g08670	2
GO:0009508	plastid chromosome	2/1953	6/15042	2.57	0.177214	0.757586	LOC_Os04g43420/LOC_Os05g22614	2
GO:0042646	plastid nucleoid	2/1953	7/15042	2.2	0.22768	0.840744	LOC_Os03g62240/LOC_Os05g08790	2
GO:0097458	neuron part	2/1953	7/15042	2.2	0.22768	0.840744	LOC_Os09g35620/LOC_Os12g08670	2
GO:0005732	small nucleolar ribonucleoprotein complex	2/1953	8/15042	1.93	0.278918	0.85582	LOC_Os02g08090/LOC_Os04g31950	2
GO:0030286	dynein complex	2/1953	8/15042	1.93	0.278918	0.85582	LOC_Os01g55510/LOC_Os02g36990	2
GO:0042555	MCM complex	2/1953	8/15042	1.93	0.278918	0.85582	LOC_Os01g07260/LOC_Os11g29380	2
GO:0044798	nuclear transcription factor complex	2/1953	8/15042	1.93	0.278918	0.85582	LOC_Os09g25550/LOC_Os09g35620	2
GO:0048188	Set1C/COMPASS complex	2/1953	8/15042	1.93	0.278918	0.85582	LOC_Os11g04890/LOC_Os11g04930	2
GO:0030658	transport vesicle membrane	2/1953	9/15042	1.71	0.329875	0.85582	LOC_Os02g47010/LOC_Os12g08670	2
GO:0032153	cell division site	2/1953	9/15042	1.71	0.329875	0.85582	LOC_Os10g03400/LOC_Os12g40260	2
GO:0090575	RNA polymerase II transcription factor complex	2/1953	9/15042	1.71	0.329875	0.85582	LOC_Os09g25550/LOC_Os09g35620	2
GO:0000428	DNA-directed RNA polymerase complex	2/1953	10/15042	1.54	0.379763	0.872179	LOC_Os04g48370/LOC_Os09g25550	2
GO:0005839	proteasome core complex	2/1953	10/15042	1.54	0.379763	0.872179	LOC_Os07g42260/LOC_Os08g41730	2
GO:0055029	nuclear DNA-directed RNA polymerase complex	2/1953	10/15042	1.54	0.379763	0.872179	LOC_Os04g48370/LOC_Os09g25550	2
GO:0061695	transferase complex, transferring phosphorus-containing groups	2/1953	10/15042	1.54	0.379763	0.872179	LOC_Os04g48370/LOC_Os09g25550	2
GO:0009501	amyloplast	2/1953	11/15042	1.4	0.427999	0.872179	LOC_Os01g52250/LOC_Os02g51070	2
GO:0009539	photosystem II reaction center	2/1953	11/15042	1.4	0.427999	0.872179	LOC_Os02g24642/LOC_Os04g16866	2
GO:0030127	COPII vesicle coat	2/1953	12/15042	1.28	0.474171	0.872179	LOC_Os04g33690/LOC_Os09g28610	2
GO:0030880	RNA polymerase complex	2/1953	12/15042	1.28	0.474171	0.872179	LOC_Os04g48370/LOC_Os09g25550	2
GO:0045263	proton-transporting ATP synthase complex, coupling factor F(o)	2/1953	12/15042	1.28	0.474171	0.872179	LOC_Os01g58010/LOC_Os10g38272	2
GO:0005666	DNA-directed RNA polymerase III complex	2/1953	14/15042	1.1	0.559323	0.919003	LOC_Os03g62870/LOC_Os04g48370	2
GO:0019773	proteasome core complex, alpha-subunit complex	2/1953	14/15042	1.1	0.559323	0.919003	LOC_Os07g28590/LOC_Os07g42260	2
GO:0031968	organelle outer membrane	2/1953	14/15042	1.1	0.559323	0.919003	LOC_Os01g73280/LOC_Os04g33770	2
GO:0000502	proteasome complex	2/1953	15/15042	1.03	0.598045	0.944646	LOC_Os03g38720/LOC_Os05g01450	2
GO:0009706	chloroplast inner membrane	2/1953	15/15042	1.03	0.598045	0.944646	LOC_Os01g52864/LOC_Os01g72710	2
GO:0000148	1,3-beta-D-glucan synthase complex	2/1953	17/15042	0.91	0.667654	0.953476	LOC_Os01g48200/Oryza_sativa_newGene_3344	2
GO:0030136	clathrin-coated vesicle	2/1953	17/15042	0.91	0.667654	0.953476	LOC_Os05g02140/LOC_Os10g10580	2
GO:0016459	myosin complex	2/1953	18/15042	0.86	0.698633	0.981141	LOC_Os01g51634/LOC_Os06g29350	2
GO:0005741	mitochondrial outer membrane	2/1953	19/15042	0.81	0.727175	0.981141	LOC_Os01g73280/LOC_Os04g33770	2
GO:0033290	eukaryotic 48S preinitiation complex	2/1953	19/15042	0.81	0.727175	0.981141	LOC_Os01g12870/LOC_Os05g01450	2
GO:0005875	microtubule associated complex	2/1953	20/15042	0.77	0.75339	0.981141	LOC_Os02g12200/LOC_Os04g48160	2
GO:0016282	eukaryotic 43S preinitiation complex	2/1953	20/15042	0.77	0.75339	0.981141	LOC_Os01g12870/LOC_Os05g01450	2
GO:0019867	outer membrane	2/1953	20/15042	0.77	0.75339	0.981141	LOC_Os01g73280/LOC_Os04g33770	2
GO:0005852	eukaryotic translation initiation factor 3 complex	2/1953	21/15042	0.73	0.777401	0.981141	LOC_Os01g12870/LOC_Os05g01450	2
GO:0005740	mitochondrial envelope	2/1953	23/15042	0.67	0.819334	0.981141	LOC_Os01g73280/LOC_Os04g33770	2
GO:0009707	chloroplast outer membrane	2/1953	23/15042	0.67	0.819334	0.981141	LOC_Os05g02060/LOC_Os12g01449	2
GO:0031969	chloroplast membrane	2/1953	25/15042	0.62	0.854038	0.981141	LOC_Os01g45910/LOC_Os01g72710	2
GO:0098796	membrane protein complex	2/1953	25/15042	0.62	0.854038	0.981141	LOC_Os01g73280/LOC_Os09g35620	2
GO:0055035	plastid thylakoid membrane	2/1953	34/15042	0.45	0.946502	0.981141	LOC_Os02g51710/LOC_Os05g08790	2
GO:0034357	photosynthetic membrane	2/1953	37/15042	0.42	0.962185	0.981141	LOC_Os02g51710/LOC_Os05g08790	2
GO:0031976	plastid thylakoid	2/1953	38/15042	0.41	0.966351	0.981141	LOC_Os02g51710/LOC_Os05g08790	2
GO:0016592	mediator complex	2/1953	42/15042	0.37	0.979009	0.981141	LOC_Os01g15520/LOC_Os02g49640	2
GO:0000786	nucleosome	2/1953	43/15042	0.36	0.981366	0.981141	LOC_Os04g18090/LOC_Os07g36130	2
GO:0005743	mitochondrial inner membrane	2/1953	54/15042	0.29	0.995093	0.981141	LOC_Os01g58010/LOC_Os06g09260	2
GO:0005777	peroxisome	2/1953	54/15042	0.29	0.995093	0.981141	LOC_Os02g51350/LOC_Os11g39220	2
GO:0000791	euchromatin	1/1953	1/15042	7.7	0.129836	0.587092	LOC_Os09g35620	1
GO:0000923	equatorial microtubule organizing center	1/1953	1/15042	7.7	0.129836	0.587092	LOC_Os04g42330	1
GO:0001533	cornified envelope	1/1953	1/15042	7.7	0.129836	0.587092	LOC_Os09g35620	1
GO:0005719	nuclear euchromatin	1/1953	1/15042	7.7	0.129836	0.587092	LOC_Os09g35620	1
GO:0005902	microvillus	1/1953	1/15042	7.7	0.129836	0.587092	LOC_Os09g35620	1
GO:0005913	cell-cell adherens junction	1/1953	1/15042	7.7	0.129836	0.587092	LOC_Os09g35620	1
GO:0005915	zonula adherens	1/1953	1/15042	7.7	0.129836	0.587092	LOC_Os09g35620	1
GO:0005916	fascia adherens	1/1953	1/15042	7.7	0.129836	0.587092	LOC_Os09g35620	1
GO:0005923	bicellular tight junction	1/1953	1/15042	7.7	0.129836	0.587092	LOC_Os09g35620	1
GO:0008021	synaptic vesicle	1/1953	1/15042	7.7	0.129836	0.587092	LOC_Os12g08670	1
GO:0008275	gamma-tubulin small complex	1/1953	1/15042	7.7	0.129836	0.587092	LOC_Os04g42330	1
GO:0009512	cytochrome b6f complex	1/1953	1/15042	7.7	0.129836	0.587092	LOC_Os03g55720	1
GO:0016327	apicolateral plasma membrane	1/1953	1/15042	7.7	0.129836	0.587092	LOC_Os09g35620	1
GO:0016600	flotillin complex	1/1953	1/15042	7.7	0.129836	0.587092	LOC_Os09g35620	1
GO:0030027	lamellipodium	1/1953	1/15042	7.7	0.129836	0.587092	LOC_Os09g35620	1
GO:0030057	desmosome	1/1953	1/15042	7.7	0.129836	0.587092	LOC_Os09g35620	1
GO:0030672	synaptic vesicle membrane	1/1953	1/15042	7.7	0.129836	0.587092	LOC_Os12g08670	1
GO:0030877	beta-catenin destruction complex	1/1953	1/15042	7.7	0.129836	0.587092	LOC_Os09g35620	1
GO:0031004	potassium ion-transporting ATPase complex	1/1953	1/15042	7.7	0.129836	0.587092	LOC_Os03g54100	1
GO:0031332	RNAi effector complex	1/1953	1/15042	7.7	0.129836	0.587092	LOC_Os12g16290	1
GO:0031528	microvillus membrane	1/1953	1/15042	7.7	0.129836	0.587092	LOC_Os09g35620	1
GO:0031983	vesicle lumen	1/1953	1/15042	7.7	0.129836	0.587092	LOC_Os09g35620	1
GO:0032806	carboxy-terminal domain protein kinase complex	1/1953	1/15042	7.7	0.129836	0.587092	LOC_Os09g25550	1
GO:0034750	Scrib-APC-beta-catenin complex	1/1953	1/15042	7.7	0.129836	0.587092	LOC_Os09g35620	1
GO:0034774	secretory granule lumen	1/1953	1/15042	7.7	0.129836	0.587092	LOC_Os09g35620	1
GO:0035580	specific granule lumen	1/1953	1/15042	7.7	0.129836	0.587092	LOC_Os09g35620	1
GO:0036449	microtubule minus-end	1/1953	1/15042	7.7	0.129836	0.587092	LOC_Os06g11990	1
GO:0042581	specific granule	1/1953	1/15042	7.7	0.129836	0.587092	LOC_Os09g35620	1
GO:0043186	P granule	1/1953	1/15042	7.7	0.129836	0.587092	LOC_Os03g06440	1
GO:0043198	dendritic shaft	1/1953	1/15042	7.7	0.129836	0.587092	LOC_Os09g35620	1
GO:0043296	apical junction complex	1/1953	1/15042	7.7	0.129836	0.587092	LOC_Os09g35620	1
GO:0044853	plasma membrane raft	1/1953	1/15042	7.7	0.129836	0.587092	LOC_Os09g35620	1
GO:0045121	membrane raft	1/1953	1/15042	7.7	0.129836	0.587092	LOC_Os09g35620	1
GO:0045334	clathrin-coated endocytic vesicle	1/1953	1/15042	7.7	0.129836	0.587092	LOC_Os10g10580	1
GO:0060205	cytoplasmic vesicle lumen	1/1953	1/15042	7.7	0.129836	0.587092	LOC_Os09g35620	1
GO:0070160	occluding junction	1/1953	1/15042	7.7	0.129836	0.587092	LOC_Os09g35620	1
GO:0070369	beta-catenin-TCF7L2 complex	1/1953	1/15042	7.7	0.129836	0.587092	LOC_Os09g35620	1
GO:0070876	SOSS complex	1/1953	1/15042	7.7	0.129836	0.587092	LOC_Os01g53940	1
GO:0071664	catenin-TCF7L2 complex	1/1953	1/15042	7.7	0.129836	0.587092	LOC_Os09g35620	1
GO:0071665	gamma-catenin-TCF7L2 complex	1/1953	1/15042	7.7	0.129836	0.587092	LOC_Os09g35620	1
GO:0098572	stromal side of plastid thylakoid membrane	1/1953	1/15042	7.7	0.129836	0.587092	LOC_Os05g22614	1
GO:0098589	membrane region	1/1953	1/15042	7.7	0.129836	0.587092	LOC_Os09g35620	1
GO:0098793	presynapse	1/1953	1/15042	7.7	0.129836	0.587092	LOC_Os12g08670	1
GO:0098857	membrane microdomain	1/1953	1/15042	7.7	0.129836	0.587092	LOC_Os09g35620	1
GO:0098858	actin-based cell projection	1/1953	1/15042	7.7	0.129836	0.587092	LOC_Os09g35620	1
GO:0099501	exocytic vesicle membrane	1/1953	1/15042	7.7	0.129836	0.587092	LOC_Os12g08670	1
GO:0101002	ficolin-1-rich granule	1/1953	1/15042	7.7	0.129836	0.587092	LOC_Os09g35620	1
GO:1902554	serine/threonine protein kinase complex	1/1953	1/15042	7.7	0.129836	0.587092	LOC_Os09g25550	1
GO:1902911	protein kinase complex	1/1953	1/15042	7.7	0.129836	0.587092	LOC_Os09g25550	1
GO:1904813	ficolin-1-rich granule lumen	1/1953	1/15042	7.7	0.129836	0.587092	LOC_Os09g35620	1
GO:1990752	microtubule end	1/1953	1/15042	7.7	0.129836	0.587092	LOC_Os06g11990	1
GO:1990907	beta-catenin-TCF complex	1/1953	1/15042	7.7	0.129836	0.587092	LOC_Os09g35620	1
GO:1990909	Wnt signalosome	1/1953	1/15042	7.7	0.129836	0.587092	LOC_Os09g35620	1
GO:0000418	DNA-directed RNA polymerase IV complex	1/1953	2/15042	3.85	0.242823	0.840744	LOC_Os04g48370	1
GO:0000811	GINS complex	1/1953	2/15042	3.85	0.242823	0.840744	LOC_Os05g37980	1
GO:0005663	DNA replication factor C complex	1/1953	2/15042	3.85	0.242823	0.840744	LOC_Os02g47605	1
GO:0005880	nuclear microtubule	1/1953	2/15042	3.85	0.242823	0.840744	LOC_Os09g25500	1
GO:0005882	intermediate filament	1/1953	2/15042	3.85	0.242823	0.840744	LOC_Os09g35620	1
GO:0009326	formate dehydrogenase complex	1/1953	2/15042	3.85	0.242823	0.840744	LOC_Os06g29220	1
GO:0010330	cellulose synthase complex	1/1953	2/15042	3.85	0.242823	0.840744	LOC_Os06g11990	1
GO:0016234	inclusion body	1/1953	2/15042	3.85	0.242823	0.840744	LOC_Os03g03920	1
GO:0016235	aggresome	1/1953	2/15042	3.85	0.242823	0.840744	LOC_Os03g03920	1
GO:0016324	apical plasma membrane	1/1953	2/15042	3.85	0.242823	0.840744	LOC_Os09g35620	1
GO:0016342	catenin complex	1/1953	2/15042	3.85	0.242823	0.840744	LOC_Os09g35620	1
GO:0030874	nucleolar chromatin	1/1953	2/15042	3.85	0.242823	0.840744	LOC_Os03g23050	1
GO:0031209	SCAR complex	1/1953	2/15042	3.85	0.242823	0.840744	Oryza_sativa_newGene_1257	1
GO:0031253	cell projection membrane	1/1953	2/15042	3.85	0.242823	0.840744	LOC_Os09g35620	1
GO:0042565	RNA nuclear export complex	1/1953	2/15042	3.85	0.242823	0.840744	LOC_Os11g31470	1
GO:0042720	mitochondrial inner membrane peptidase complex	1/1953	2/15042	3.85	0.242823	0.840744	LOC_Os04g08340	1
GO:0043036	starch grain	1/1953	2/15042	3.85	0.242823	0.840744	LOC_Os11g37560	1
GO:0045111	intermediate filament cytoskeleton	1/1953	2/15042	3.85	0.242823	0.840744	LOC_Os09g35620	1
GO:0045177	apical part of cell	1/1953	2/15042	3.85	0.242823	0.840744	LOC_Os09g35620	1
GO:0000153	cytoplasmic ubiquitin ligase complex	1/1953	3/15042	2.57	0.341145	0.85582	LOC_Os01g73280	1
GO:0000220	vacuolar proton-transporting V-type ATPase, V0 domain	1/1953	3/15042	2.57	0.341145	0.85582	LOC_Os03g14690	1
GO:0000835	ER ubiquitin ligase complex	1/1953	3/15042	2.57	0.341145	0.85582	LOC_Os01g73280	1
GO:0000837	Doa10p ubiquitin ligase complex	1/1953	3/15042	2.57	0.341145	0.85582	LOC_Os01g73280	1
GO:0000839	Hrd1p ubiquitin ligase ERAD-L complex	1/1953	3/15042	2.57	0.341145	0.85582	LOC_Os01g73280	1
GO:0000930	gamma-tubulin complex	1/1953	3/15042	2.57	0.341145	0.85582	LOC_Os04g42330	1
GO:0005813	centrosome	1/1953	3/15042	2.57	0.341145	0.85582	LOC_Os09g35620	1
GO:0005826	actomyosin contractile ring	1/1953	3/15042	2.57	0.341145	0.85582	LOC_Os12g40260	1
GO:0005853	eukaryotic translation elongation factor 1 complex	1/1953	3/15042	2.57	0.341145	0.85582	LOC_Os07g42300	1
GO:0005871	kinesin complex	1/1953	3/15042	2.57	0.341145	0.85582	LOC_Os02g12200	1
GO:0005912	adherens junction	1/1953	3/15042	2.57	0.341145	0.85582	LOC_Os09g35620	1
GO:0016471	vacuolar proton-transporting V-type ATPase complex	1/1953	3/15042	2.57	0.341145	0.85582	LOC_Os02g47320	1
GO:0030135	coated vesicle	1/1953	3/15042	2.57	0.341145	0.85582	LOC_Os10g10580	1
GO:0031252	cell leading edge	1/1953	3/15042	2.57	0.341145	0.85582	LOC_Os09g35620	1
GO:0032155	cell division site part	1/1953	3/15042	2.57	0.341145	0.85582	LOC_Os12g40260	1
GO:0032299	ribonuclease H2 complex	1/1953	3/15042	2.57	0.341145	0.85582	LOC_Os11g05570	1
GO:0033063	Rad51B-Rad51C-Rad51D-XRCC2 complex	1/1953	3/15042	2.57	0.341145	0.85582	LOC_Os05g03050	1
GO:0033597	mitotic checkpoint complex	1/1953	3/15042	2.57	0.341145	0.85582	LOC_Os03g55140	1
GO:0034098	VCP-NPL4-UFD1 AAA ATPase complex	1/1953	3/15042	2.57	0.341145	0.85582	LOC_Os01g73280	1
GO:0036266	Cdc48p-Npl4p-Vms1p AAA ATPase complex	1/1953	3/15042	2.57	0.341145	0.85582	LOC_Os01g73280	1
GO:0036501	UFD1-NPL4 complex	1/1953	3/15042	2.57	0.341145	0.85582	LOC_Os01g73280	1
GO:0045254	pyruvate dehydrogenase complex	1/1953	3/15042	2.57	0.341145	0.85582	LOC_Os06g01630	1
GO:0070161	anchoring junction	1/1953	3/15042	2.57	0.341145	0.85582	LOC_Os09g35620	1
GO:0070938	contractile ring	1/1953	3/15042	2.57	0.341145	0.85582	LOC_Os12g40260	1
GO:0098797	plasma membrane protein complex	1/1953	3/15042	2.57	0.341145	0.85582	LOC_Os09g35620	1
GO:0098799	outer mitochondrial membrane protein complex	1/1953	3/15042	2.57	0.341145	0.85582	LOC_Os01g73280	1
GO:1990246	uniplex complex	1/1953	3/15042	2.57	0.341145	0.85582	LOC_Os03g13050	1
GO:1990298	bub1-bub3 complex	1/1953	3/15042	2.57	0.341145	0.85582	LOC_Os03g55140	1
GO:0000127	transcription factor TFIIIC complex	1/1953	4/15042	1.93	0.426706	0.872179	LOC_Os05g49480	1
GO:0000243	commitment complex	1/1953	4/15042	1.93	0.426706	0.872179	LOC_Os02g16640	1
GO:0000427	plastid-encoded plastid RNA polymerase complex	1/1953	4/15042	1.93	0.426706	0.872179	LOC_Os04g43420	1
GO:0000445	THO complex part of transcription export complex	1/1953	4/15042	1.93	0.426706	0.872179	LOC_Os05g49470	1
GO:0001401	mitochondrial sorting and assembly machinery complex	1/1953	4/15042	1.93	0.426706	0.872179	LOC_Os11g01490	1
GO:0005901	caveola	1/1953	4/15042	1.93	0.426706	0.872179	LOC_Os09g35620	1
GO:0005960	glycine cleavage complex	1/1953	4/15042	1.93	0.426706	0.872179	LOC_Os10g37180	1
GO:0008622	epsilon DNA polymerase complex	1/1953	4/15042	1.93	0.426706	0.872179	LOC_Os08g36330	1
GO:0012506	vesicle membrane	1/1953	4/15042	1.93	0.426706	0.872179	LOC_Os12g08670	1
GO:0014704	intercalated disc	1/1953	4/15042	1.93	0.426706	0.872179	LOC_Os09g35620	1
GO:0015030	Cajal body	1/1953	4/15042	1.93	0.426706	0.872179	LOC_Os05g08360	1
GO:0016328	lateral plasma membrane	1/1953	4/15042	1.93	0.426706	0.872179	LOC_Os09g35620	1
GO:0016363	nuclear matrix	1/1953	4/15042	1.93	0.426706	0.872179	LOC_Os05g08790	1
GO:0019897	extrinsic component of plasma membrane	1/1953	4/15042	1.93	0.426706	0.872179	LOC_Os09g35620	1
GO:0030659	cytoplasmic vesicle membrane	1/1953	4/15042	1.93	0.426706	0.872179	LOC_Os12g08670	1
GO:0044291	cell-cell contact zone	1/1953	4/15042	1.93	0.426706	0.872179	LOC_Os09g35620	1
GO:0044456	synapse part	1/1953	4/15042	1.93	0.426706	0.872179	LOC_Os12g08670	1
GO:0071004	U2-type prespliceosome	1/1953	4/15042	1.93	0.426706	0.872179	LOC_Os02g16640	1
GO:0000015	phosphopyruvate hydratase complex	1/1953	5/15042	1.54	0.50116	0.872179	LOC_Os06g04510	1
GO:0000781	chromosome, telomeric region	1/1953	5/15042	1.54	0.50116	0.872179	LOC_Os01g67850	1
GO:0000813	ESCRT I complex	1/1953	5/15042	1.54	0.50116	0.872179	LOC_Os03g37570	1
GO:0000836	Hrd1p ubiquitin ligase complex	1/1953	5/15042	1.54	0.50116	0.872179	LOC_Os01g73280	1
GO:0005628	prospore membrane	1/1953	5/15042	1.54	0.50116	0.872179	LOC_Os10g03400	1
GO:0005657	replication fork	1/1953	5/15042	1.54	0.50116	0.872179	LOC_Os05g03050	1
GO:0005750	mitochondrial respiratory chain complex III	1/1953	5/15042	1.54	0.50116	0.872179	LOC_Os08g14860	1
GO:0005776	autophagosome	1/1953	5/15042	1.54	0.50116	0.872179	LOC_Os03g03920	1
GO:0005786	signal recognition particle, endoplasmic reticulum targeting	1/1953	5/15042	1.54	0.50116	0.872179	LOC_Os05g43390	1
GO:0009330	DNA topoisomerase complex (ATP-hydrolyzing)	1/1953	5/15042	1.54	0.50116	0.872179	LOC_Os02g05365	1
GO:0016591	DNA-directed RNA polymerase II, holoenzyme	1/1953	5/15042	1.54	0.50116	0.872179	LOC_Os09g25550	1
GO:0030016	myofibril	1/1953	5/15042	1.54	0.50116	0.872179	LOC_Os09g35620	1
GO:0030017	sarcomere	1/1953	5/15042	1.54	0.50116	0.872179	LOC_Os09g35620	1
GO:0030018	Z disc	1/1953	5/15042	1.54	0.50116	0.872179	LOC_Os09g35620	1
GO:0030425	dendrite	1/1953	5/15042	1.54	0.50116	0.872179	LOC_Os09g35620	1
GO:0030532	small nuclear ribonucleoprotein complex	1/1953	5/15042	1.54	0.50116	0.872179	LOC_Os01g73604	1
GO:0031012	extracellular matrix	1/1953	5/15042	1.54	0.50116	0.872179	LOC_Os02g50730	1
GO:0031674	I band	1/1953	5/15042	1.54	0.50116	0.872179	LOC_Os09g35620	1
GO:0032993	protein-DNA complex	1/1953	5/15042	1.54	0.50116	0.872179	LOC_Os09g35620	1
GO:0036477	somatodendritic compartment	1/1953	5/15042	1.54	0.50116	0.872179	LOC_Os09g35620	1
GO:0042763	intracellular immature spore	1/1953	5/15042	1.54	0.50116	0.872179	LOC_Os10g03400	1
GO:0042764	ascospore-type prospore	1/1953	5/15042	1.54	0.50116	0.872179	LOC_Os10g03400	1
GO:0043292	contractile fiber	1/1953	5/15042	1.54	0.50116	0.872179	LOC_Os09g35620	1
GO:0044449	contractile fiber part	1/1953	5/15042	1.54	0.50116	0.872179	LOC_Os09g35620	1
GO:0055037	recycling endosome	1/1953	5/15042	1.54	0.50116	0.872179	LOC_Os12g08670	1
GO:0060187	cell pole	1/1953	5/15042	1.54	0.50116	0.872179	LOC_Os10g03400	1
GO:0072686	mitotic spindle	1/1953	5/15042	1.54	0.50116	0.872179	LOC_Os01g15340	1
GO:0089701	U2AF	1/1953	5/15042	1.54	0.50116	0.872179	LOC_Os01g47750	1
GO:0090734	site of DNA damage	1/1953	5/15042	1.54	0.50116	0.872179	LOC_Os01g67850	1
GO:0097447	dendritic tree	1/1953	5/15042	1.54	0.50116	0.872179	LOC_Os09g35620	1
GO:1990112	RQC complex	1/1953	5/15042	1.54	0.50116	0.872179	LOC_Os01g73280	1
GO:0000322	storage vacuole	1/1953	6/15042	1.28	0.565949	0.919003	LOC_Os07g47400	1
GO:0005665	DNA-directed RNA polymerase II, core complex	1/1953	6/15042	1.28	0.565949	0.919003	LOC_Os03g62870	1
GO:0009331	glycerol-3-phosphate dehydrogenase complex	1/1953	6/15042	1.28	0.565949	0.919003	LOC_Os01g58740	1
GO:0009360	DNA polymerase III complex	1/1953	6/15042	1.28	0.565949	0.919003	LOC_Os08g02670	1
GO:0016323	basolateral plasma membrane	1/1953	6/15042	1.28	0.565949	0.919003	LOC_Os09g35620	1
GO:0030424	axon	1/1953	6/15042	1.28	0.565949	0.919003	LOC_Os09g35620	1
GO:0030864	cortical actin cytoskeleton	1/1953	6/15042	1.28	0.565949	0.919003	LOC_Os12g40260	1
GO:0031428	box C/D snoRNP complex	1/1953	6/15042	1.28	0.565949	0.919003	LOC_Os05g08360	1
GO:0034399	nuclear periphery	1/1953	6/15042	1.28	0.565949	0.919003	LOC_Os05g08790	1
GO:0043005	neuron projection	1/1953	6/15042	1.28	0.565949	0.919003	LOC_Os09g35620	1
GO:0098687	chromosomal region	1/1953	6/15042	1.28	0.565949	0.919003	LOC_Os01g67850	1
GO:0000177	cytoplasmic exosome (RNase complex)	1/1953	7/15042	1.1	0.622327	0.944646	LOC_Os08g02360	1
GO:0000347	THO complex	1/1953	7/15042	1.1	0.622327	0.944646	LOC_Os11g29380	1
GO:0000943	retrotransposon nucleocapsid	1/1953	7/15042	1.1	0.622327	0.944646	LOC_Os11g39710	1
GO:0005675	holo TFIIH complex	1/1953	7/15042	1.1	0.622327	0.944646	LOC_Os09g25550	1
GO:0005736	DNA-directed RNA polymerase I complex	1/1953	7/15042	1.1	0.622327	0.944646	LOC_Os03g62870	1
GO:0008180	COP9 signalosome	1/1953	7/15042	1.1	0.622327	0.944646	LOC_Os12g42810	1
GO:0009295	nucleoid	1/1953	7/15042	1.1	0.622327	0.944646	LOC_Os05g08790	1
GO:0009528	plastid inner membrane	1/1953	7/15042	1.1	0.622327	0.944646	LOC_Os01g72710	1
GO:0031314	extrinsic component of mitochondrial inner membrane	1/1953	7/15042	1.1	0.622327	0.944646	LOC_Os03g62260	1
GO:0035838	growing cell tip	1/1953	7/15042	1.1	0.622327	0.944646	LOC_Os10g03400	1
GO:0035861	site of double-strand break	1/1953	7/15042	1.1	0.622327	0.944646	LOC_Os01g67850	1
GO:0000326	protein storage vacuole	1/1953	8/15042	0.96	0.671386	0.953476	LOC_Os07g47400	1
GO:0000922	spindle pole	1/1953	8/15042	0.96	0.671386	0.953476	LOC_Os04g42330	1
GO:0009504	cell plate	1/1953	8/15042	0.96	0.671386	0.953476	LOC_Os10g10580	1
GO:0017119	Golgi transport complex	1/1953	8/15042	0.96	0.671386	0.953476	LOC_Os03g63250	1
GO:0030173	integral component of Golgi membrane	1/1953	8/15042	0.96	0.671386	0.953476	LOC_Os07g38990	1
GO:0030427	site of polarized growth	1/1953	8/15042	0.96	0.671386	0.953476	LOC_Os10g03400	1
GO:0030688	preribosome, small subunit precursor	1/1953	8/15042	0.96	0.671386	0.953476	LOC_Os12g14110	1
GO:0044391	ribosomal subunit	1/1953	8/15042	0.96	0.671386	0.953476	LOC_Os07g07760	1
GO:0051286	cell tip	1/1953	8/15042	0.96	0.671386	0.953476	LOC_Os10g03400	1
GO:0098590	plasma membrane region	1/1953	8/15042	0.96	0.671386	0.953476	LOC_Os09g35620	1
GO:0000124	SAGA complex	1/1953	9/15042	0.86	0.714075	0.981141	LOC_Os01g02860	1
GO:0000776	kinetochore	1/1953	9/15042	0.86	0.714075	0.981141	LOC_Os03g55140	1
GO:0005778	peroxisomal membrane	1/1953	9/15042	0.86	0.714075	0.981141	LOC_Os02g03070	1
GO:0030686	90S preribosome	1/1953	9/15042	0.86	0.714075	0.981141	LOC_Os12g14110	1
GO:0042721	mitochondrial inner membrane protein insertion complex	1/1953	9/15042	0.86	0.714075	0.981141	LOC_Os04g30740	1
GO:0000176	nuclear exosome (RNase complex)	1/1953	10/15042	0.77	0.75122	0.981141	LOC_Os08g02360	1
GO:0005685	U1 snRNP	1/1953	10/15042	0.77	0.75122	0.981141	LOC_Os02g16640	1
GO:0005762	mitochondrial large ribosomal subunit	1/1953	10/15042	0.77	0.75122	0.981141	LOC_Os07g23244	1
GO:0005815	microtubule organizing center	1/1953	10/15042	0.77	0.75122	0.981141	LOC_Os09g35620	1
GO:0005876	spindle microtubule	1/1953	10/15042	0.77	0.75122	0.981141	LOC_Os02g57120	1
GO:0044452	nucleolar part	1/1953	10/15042	0.77	0.75122	0.981141	LOC_Os03g23050	1
GO:0000123	histone acetyltransferase complex	1/1953	11/15042	0.7	0.783542	0.981141	LOC_Os12g12950	1
GO:0000794	condensed nuclear chromosome	1/1953	11/15042	0.7	0.783542	0.981141	LOC_Os11g40150	1
GO:0005680	anaphase-promoting complex	1/1953	12/15042	0.64	0.811667	0.981141	LOC_Os05g50360	1
GO:0031965	nuclear membrane	1/1953	12/15042	0.64	0.811667	0.981141	LOC_Os09g35620	1
GO:0071013	catalytic step 2 spliceosome	1/1953	12/15042	0.64	0.811667	0.981141	LOC_Os12g15420	1
GO:0005744	mitochondrial inner membrane presequence translocase complex	1/1953	14/15042	0.55	0.857433	0.981141	Oryza_sativa_newGene_5084	1
GO:0005788	endoplasmic reticulum lumen	1/1953	14/15042	0.55	0.857433	0.981141	LOC_Os03g18200	1
GO:0010008	endosome membrane	1/1953	14/15042	0.55	0.857433	0.981141	LOC_Os04g58180	1
GO:0042579	microbody	1/1953	14/15042	0.55	0.857433	0.981141	LOC_Os02g51350	1
GO:0044440	endosomal part	1/1953	14/15042	0.55	0.857433	0.981141	LOC_Os04g58180	1
GO:0044463	cell projection part	1/1953	14/15042	0.55	0.857433	0.981141	LOC_Os09g35620	1
GO:0120038	plasma membrane bounded cell projection part	1/1953	14/15042	0.55	0.857433	0.981141	LOC_Os09g35620	1
GO:0030126	COPI vesicle coat	1/1953	15/15042	0.51	0.87596	0.981141	LOC_Os05g24580	1
GO:0044455	mitochondrial membrane part	1/1953	15/15042	0.51	0.87596	0.981141	LOC_Os01g73280	1
GO:0098798	mitochondrial protein complex	1/1953	15/15042	0.51	0.87596	0.981141	LOC_Os01g73280	1
GO:0005669	transcription factor TFIID complex	1/1953	16/15042	0.48	0.892081	0.981141	LOC_Os10g29660	1
GO:0005635	nuclear envelope	1/1953	19/15042	0.41	0.928931	0.981141	LOC_Os09g35620	1
GO:0010287	plastoglobule	1/1953	19/15042	0.41	0.928931	0.981141	LOC_Os02g10390	1
GO:0042170	plastid membrane	1/1953	19/15042	0.41	0.928931	0.981141	LOC_Os01g72710	1
GO:0098791	Golgi subcompartment	1/1953	19/15042	0.41	0.928931	0.981141	LOC_Os04g58180	1
GO:0009705	plant-type vacuole membrane	1/1953	20/15042	0.39	0.93817	0.981141	LOC_Os03g54100	1
GO:0031305	integral component of mitochondrial inner membrane	1/1953	20/15042	0.39	0.93817	0.981141	LOC_Os03g13050	1
GO:0005643	nuclear pore	1/1953	21/15042	0.37	0.946209	0.981141	LOC_Os02g10794	1
GO:0044431	Golgi apparatus part	1/1953	21/15042	0.37	0.946209	0.981141	LOC_Os04g58180	1
GO:0120025	plasma membrane bounded cell projection	1/1953	21/15042	0.37	0.946209	0.981141	LOC_Os09g35620	1
GO:0019866	organelle inner membrane	1/1953	22/15042	0.35	0.953202	0.981141	LOC_Os01g72710	1
GO:0042995	cell projection	1/1953	22/15042	0.35	0.953202	0.981141	LOC_Os09g35620	1
GO:0000325	plant-type vacuole	1/1953	24/15042	0.32	0.964581	0.981141	LOC_Os07g47400	1
GO:0032040	small-subunit processome	1/1953	25/15042	0.31	0.969187	0.981141	LOC_Os05g08360	1
GO:0080008	Cul4-RING E3 ubiquitin ligase complex	1/1953	25/15042	0.31	0.969187	0.981141	LOC_Os06g50880	1
GO:0070469	respiratory chain	1/1953	27/15042	0.29	0.976681	0.981141	LOC_Os02g47200	1
GO:0030014	CCR4-NOT complex	1/1953	28/15042	0.28	0.979714	0.981141	LOC_Os10g28580	1
GO:0030176	integral component of endoplasmic reticulum membrane	1/1953	31/15042	0.25	0.986646	0.981141	LOC_Os03g58570	1
GO:0015934	large ribosomal subunit	1/1953	32/15042	0.24	0.988383	0.981141	LOC_Os08g41810	1
GO:0005802	trans-Golgi network	1/1953	65/15042	0.12	0.999884	0.981141	LOC_Os04g58180	1

## Sheet: S7
Table S7 Gene Ontology (GO) Analysis of the differentially expressed genes in Molecular Function Ontology
ID	Description	Gene Ratio	Bg Ratio	Enrich_factor	p value	q value	Gene ID	Count
GO:0005524	ATP binding	522/3077	2748/25974	1.6	6.91006e-31	5.05526e-28	ChrSy.fgenesh.gene.28/ChrUn.fgenesh.gene.83/LOC_Os01g02290/LOC_Os01g02310/LOC_Os01g02350/LOC_Os01g02360/LOC_Os01g02390/LOC_Os01g02400/LOC_Os01g02420/LOC_Os01g02430/LOC_Os01g02440/LOC_Os01g02550/LOC_Os01g02570/LOC_Os01g02690/LOC_Os01g02730/LOC_Os01g02750/LOC_Os01g02760/LOC_Os01g02770/LOC_Os01g02780/LOC_Os01g02790/LOC_Os01g02800/LOC_Os01g02830/LOC_Os01g02840/LOC_Os01g04409/LOC_Os01g04550/LOC_Os01g0…	522
GO:0004672	protein kinase activity	232/3077	1349/25974	1.45	1.88762e-09	1.2554e-07	ChrUn.fgenesh.gene.83/LOC_Os01g01860/LOC_Os01g02290/LOC_Os01g02310/LOC_Os01g02350/LOC_Os01g02360/LOC_Os01g02390/LOC_Os01g02400/LOC_Os01g02420/LOC_Os01g02430/LOC_Os01g02440/LOC_Os01g02550/LOC_Os01g02570/LOC_Os01g02690/LOC_Os01g02730/LOC_Os01g02760/LOC_Os01g02770/LOC_Os01g02780/LOC_Os01g02800/LOC_Os01g02830/LOC_Os01g02840/LOC_Os01g04550/LOC_Os01g04570/LOC_Os01g08880/LOC_Os01g10900/LOC_Os01g12400/LO…	232
GO:0003676	nucleic acid binding	221/3077	6556/25974	0.28	1	0.936721	LOC_Os01g02380/LOC_Os01g03730/LOC_Os01g03830/LOC_Os01g04200/LOC_Os01g07200/LOC_Os01g11920/LOC_Os01g13620/LOC_Os01g24630/LOC_Os01g26240/LOC_Os01g34630/LOC_Os01g36600/LOC_Os01g37870/LOC_Os01g39050/LOC_Os01g45290/LOC_Os01g45810/LOC_Os01g47510/LOC_Os01g50090/LOC_Os01g55290/LOC_Os01g70540/LOC_Os01g70870/LOC_Os01g71630/LOC_Os01g73060/LOC_Os01g73950/LOC_Os02g01880/LOC_Os02g05550/LOC_Os02g12320/LOC_Os02g…	221
GO:0046872	metal ion binding	169/3077	1142/25974	1.25	0.00124	0.0335985	LOC_Os01g01710/LOC_Os01g04200/LOC_Os01g07212/LOC_Os01g09620/LOC_Os01g09660/LOC_Os01g16450/LOC_Os01g17170/LOC_Os01g24980/LOC_Os01g25010/LOC_Os01g32330/LOC_Os01g39860/LOC_Os01g53680/LOC_Os01g55240/LOC_Os01g57082/LOC_Os01g57730/LOC_Os01g57942/LOC_Os01g61070/LOC_Os01g61610/LOC_Os01g62760/LOC_Os01g64120/LOC_Os01g65830/LOC_Os01g67850/LOC_Os01g69830/LOC_Os01g73200/LOC_Os01g73460/LOC_Os01g74300/LOC_Os01g…	169
GO:0004674	protein serine/threonine kinase activity	165/3077	927/25974	1.5	4.46614e-08	2.33381e-06	LOC_Os01g01860/LOC_Os01g02750/LOC_Os01g02790/LOC_Os01g04409/LOC_Os01g05640/LOC_Os01g05960/LOC_Os01g06240/LOC_Os01g07630/LOC_Os01g08880/LOC_Os01g10700/LOC_Os01g10710/LOC_Os01g12290/LOC_Os01g12430/LOC_Os01g12790/LOC_Os01g18800/LOC_Os01g20880/LOC_Os01g22740/LOC_Os01g24620/LOC_Os01g26280/LOC_Os01g40499/LOC_Os01g45520/LOC_Os01g48000/LOC_Os01g48040/LOC_Os01g57480/LOC_Os01g57510/LOC_Os01g57520/LOC_Os01g…	165
GO:0043531	ADP binding	160/3077	532/25974	2.54	4.48688e-30	1.64125e-27	LOC_Os01g02280/LOC_Os01g05620/LOC_Os01g21240/LOC_Os01g25760/LOC_Os01g41890/LOC_Os01g42330/LOC_Os01g52270/LOC_Os01g52320/LOC_Os01g52330/LOC_Os01g57340/LOC_Os01g72390/LOC_Os02g02670/LOC_Os02g05686/LOC_Os02g16060/LOC_Os02g16270/LOC_Os02g17304/LOC_Os02g18070/LOC_Os02g18080/LOC_Os02g18140/LOC_Os02g20210/LOC_Os02g38392/LOC_Os02g41760/LOC_Os03g40194/LOC_Os04g02460/LOC_Os04g11760/LOC_Os04g11780/LOC_Os04g…	160
GO:0008270	zinc ion binding	159/3077	4111/25974	0.33	1	0.936721	LOC_Os01g02380/LOC_Os01g03710/LOC_Os01g03830/LOC_Os01g04200/LOC_Os01g09280/LOC_Os01g10580/LOC_Os01g11920/LOC_Os01g19800/LOC_Os01g24070/LOC_Os01g25270/LOC_Os01g26240/LOC_Os01g34630/LOC_Os01g45274/LOC_Os01g50090/LOC_Os01g51540/LOC_Os01g53560/LOC_Os01g55090/LOC_Os01g67850/LOC_Os01g70220/LOC_Os01g70540/LOC_Os02g02860/LOC_Os02g05720/LOC_Os02g09900/LOC_Os02g12790/LOC_Os02g13910/LOC_Os02g15560/LOC_Os02g…	159
GO:0005515	protein binding	149/3077	1212/25974	1.04	0.324079	0.563158	LOC_Os01g06820/LOC_Os01g08880/LOC_Os01g09020/LOC_Os01g09252/LOC_Os01g22430/LOC_Os01g25100/LOC_Os01g27360/LOC_Os01g28300/LOC_Os01g28680/LOC_Os01g37750/LOC_Os01g41530/LOC_Os01g49710/LOC_Os01g52980/LOC_Os01g57520/LOC_Os01g60920/LOC_Os01g67850/LOC_Os01g73280/LOC_Os01g73560/LOC_Os01g74320/LOC_Os01g74500/LOC_Os02g12040/LOC_Os02g13420/LOC_Os02g13950/LOC_Os02g21260/LOC_Os02g29150/LOC_Os02g29210/LOC_Os02g…	149
GO:0003677	DNA binding	142/3077	1506/25974	0.8	0.999084	0.936721	LOC_Os01g09280/LOC_Os01g13300/LOC_Os01g13520/LOC_Os01g17320/LOC_Os01g40980/LOC_Os01g44430/LOC_Os01g48060/LOC_Os01g48130/LOC_Os01g48290/LOC_Os01g48700/LOC_Os01g49160/LOC_Os01g52514/LOC_Os01g53560/LOC_Os01g54890/LOC_Os01g57240/LOC_Os01g69830/LOC_Os01g73430/LOC_Os02g07170/LOC_Os02g14490/LOC_Os02g31160/LOC_Os02g34970/LOC_Os02g42870/LOC_Os02g45760/LOC_Os02g46030/LOC_Os02g46780/LOC_Os02g47605/LOC_Os02g…	142
GO:0020037	heme binding	140/3077	590/25974	2	3.03795e-16	5.55626e-14	LOC_Os01g08810/LOC_Os01g10040/LOC_Os01g11340/LOC_Os01g12770/LOC_Os01g16450/LOC_Os01g25484/LOC_Os01g27890/LOC_Os01g38110/LOC_Os01g41800/LOC_Os01g41810/LOC_Os01g41820/LOC_Os01g43700/LOC_Os01g43750/LOC_Os01g43774/LOC_Os01g43844/LOC_Os01g50530/LOC_Os01g57730/LOC_Os01g63930/LOC_Os01g72270/LOC_Os01g73200/LOC_Os01g73604/LOC_Os02g02400/LOC_Os02g11020/LOC_Os02g12530/LOC_Os02g12890/LOC_Os02g14430/LOC_Os02g…	140
GO:0003674	molecular_function	131/3077	1450/25974	0.76	0.99982	0.936721	LOC_Os01g01650/LOC_Os01g01860/LOC_Os01g02500/LOC_Os01g04200/LOC_Os01g07260/LOC_Os01g08760/LOC_Os01g08880/LOC_Os01g22740/LOC_Os01g24620/LOC_Os01g25360/LOC_Os01g25500/LOC_Os01g27360/LOC_Os01g32780/LOC_Os01g36600/LOC_Os01g37650/LOC_Os01g37870/LOC_Os01g42090/LOC_Os01g55290/LOC_Os01g55940/LOC_Os01g57520/LOC_Os01g58194/LOC_Os01g67850/LOC_Os01g70850/LOC_Os01g73280/LOC_Os01g73950/LOC_Os01g74320/LOC_Os02g…	131
GO:0005506	iron ion binding	125/3077	468/25974	2.25	6.19382e-19	1.51042e-16	LOC_Os01g07920/LOC_Os01g08810/LOC_Os01g10040/LOC_Os01g11340/LOC_Os01g12770/LOC_Os01g27890/LOC_Os01g38110/LOC_Os01g41800/LOC_Os01g41810/LOC_Os01g41820/LOC_Os01g43700/LOC_Os01g43750/LOC_Os01g43774/LOC_Os01g43844/LOC_Os01g50530/LOC_Os01g53020/LOC_Os01g63930/LOC_Os01g72270/LOC_Os01g73604/LOC_Os02g11020/LOC_Os02g12530/LOC_Os02g12890/LOC_Os02g17760/LOC_Os02g18180/LOC_Os02g26770/LOC_Os02g26810/LOC_Os02g…	125
GO:0003824	catalytic activity	125/3077	1224/25974	0.86	0.9703	0.936721	LOC_Os01g01860/LOC_Os01g02500/LOC_Os01g04200/LOC_Os01g08760/LOC_Os01g08880/LOC_Os01g16146/LOC_Os01g22740/LOC_Os01g24620/LOC_Os01g25360/LOC_Os01g25500/LOC_Os01g27360/LOC_Os01g32080/LOC_Os01g36600/LOC_Os01g37650/LOC_Os01g37870/LOC_Os01g39060/LOC_Os01g39280/LOC_Os01g54560/LOC_Os01g55290/LOC_Os01g55940/LOC_Os01g57520/LOC_Os01g58194/LOC_Os01g67530/LOC_Os01g67540/LOC_Os01g67850/LOC_Os01g70850/LOC_Os01g…	125
GO:0016491	oxidoreductase activity	104/3077	439/25974	2	2.28832e-12	2.39155e-10	ChrUn.fgenesh.gene.96/LOC_Os01g18120/LOC_Os01g24980/LOC_Os01g25010/LOC_Os01g25484/LOC_Os01g25500/LOC_Os01g27230/LOC_Os01g27240/LOC_Os01g39860/LOC_Os01g41160/LOC_Os01g54940/LOC_Os01g58194/LOC_Os01g61410/LOC_Os01g61610/LOC_Os01g66720/LOC_Os01g72430/LOC_Os01g72460/LOC_Os02g05780/LOC_Os02g49720/LOC_Os02g53400/LOC_Os03g01820/LOC_Os03g09020/LOC_Os03g18200/LOC_Os03g48760/LOC_Os03g48780/LOC_Os03g57070/LO…	104
GO:0003700	transcription factor activity, sequence-specific DNA binding	95/3077	708/25974	1.13	0.10642	0.399384	LOC_Os01g08710/LOC_Os01g09080/LOC_Os01g09100/LOC_Os01g10504/LOC_Os01g14440/LOC_Os01g18584/LOC_Os01g40430/LOC_Os01g43650/LOC_Os01g48700/LOC_Os01g53260/LOC_Os01g54890/LOC_Os01g58760/LOC_Os01g60640/LOC_Os01g61080/LOC_Os01g66030/LOC_Os02g10860/LOC_Os02g31160/LOC_Os02g36924/LOC_Os02g45760/LOC_Os02g47660/LOC_Os02g53530/LOC_Os02g54160/LOC_Os03g03070/LOC_Os03g03900/LOC_Os03g06630/LOC_Os03g08460/LOC_Os03g…	95
GO:0016705	oxidoreductase activity, acting on paired donors, with incorporation or reduction of molecular oxygen	92/3077	364/25974	2.13	8.86054e-13	1.08036e-10	LOC_Os01g07920/LOC_Os01g08810/LOC_Os01g10040/LOC_Os01g11340/LOC_Os01g38110/LOC_Os01g41800/LOC_Os01g41810/LOC_Os01g41820/LOC_Os01g43700/LOC_Os01g43750/LOC_Os01g43774/LOC_Os01g43844/LOC_Os01g50530/LOC_Os01g63930/LOC_Os01g72270/LOC_Os01g73604/LOC_Os02g11020/LOC_Os02g12530/LOC_Os02g12890/LOC_Os02g17760/LOC_Os02g26810/LOC_Os02g36030/LOC_Os02g36110/LOC_Os02g36150/LOC_Os02g36190/LOC_Os02g36280/LOC_Os02g…	92
GO:0016787	hydrolase activity	84/3077	623/25974	1.14	0.113076	0.399384	LOC_Os01g02500/LOC_Os01g04200/LOC_Os01g04620/LOC_Os01g08780/LOC_Os01g25360/LOC_Os01g36600/LOC_Os01g37650/LOC_Os01g37870/LOC_Os01g55290/LOC_Os01g55310/LOC_Os01g66830/LOC_Os01g70850/LOC_Os01g73950/LOC_Os02g11720/LOC_Os02g12200/LOC_Os02g32060/LOC_Os02g35940/LOC_Os02g41770/LOC_Os02g42210/LOC_Os02g52220/LOC_Os02g55310/LOC_Os03g01880/LOC_Os03g06460/LOC_Os03g13520/LOC_Os03g14730/LOC_Os03g16670/LOC_Os03g…	84
GO:0004497	monooxygenase activity	79/3077	268/25974	2.49	5.65086e-15	8.2681e-13	LOC_Os01g08810/LOC_Os01g10040/LOC_Os01g11340/LOC_Os01g41800/LOC_Os01g41810/LOC_Os01g41820/LOC_Os01g43700/LOC_Os01g43750/LOC_Os01g43774/LOC_Os01g43844/LOC_Os01g50530/LOC_Os01g72270/LOC_Os02g05830/LOC_Os02g11020/LOC_Os02g12890/LOC_Os02g17760/LOC_Os02g26810/LOC_Os02g27200/LOC_Os02g36030/LOC_Os02g36110/LOC_Os02g36150/LOC_Os02g36190/LOC_Os02g36280/LOC_Os02g47470/LOC_Os03g04660/LOC_Os03g12260/LOC_Os03g…	79
GO:0022857	transmembrane transporter activity	73/3077	368/25974	1.67	6.31203e-06	0.000256542	LOC_Os01g02870/LOC_Os01g28980/LOC_Os01g36560/LOC_Os01g36580/LOC_Os01g42090/LOC_Os01g42234/LOC_Os01g65130/LOC_Os01g67630/LOC_Os01g71710/LOC_Os01g71740/LOC_Os01g71760/LOC_Os01g73590/LOC_Os02g02190/LOC_Os02g17500/LOC_Os02g36490/LOC_Os02g46460/LOC_Os02g47090/LOC_Os02g47200/LOC_Os02g48570/LOC_Os02g52930/LOC_Os03g05530/LOC_Os03g11900/LOC_Os03g13250/LOC_Os03g37411/LOC_Os03g37490/LOC_Os03g43720/LOC_Os03g…	73
GO:0005488	binding	67/3077	732/25974	0.77	0.992162	0.936721	LOC_Os01g01650/LOC_Os01g04200/LOC_Os01g07260/LOC_Os01g08880/LOC_Os01g32780/LOC_Os01g36600/LOC_Os01g37870/LOC_Os01g55290/LOC_Os01g57520/LOC_Os01g67850/LOC_Os01g73280/LOC_Os01g73950/LOC_Os02g31160/LOC_Os02g42210/LOC_Os02g45760/LOC_Os02g47840/LOC_Os02g51350/LOC_Os02g51410/LOC_Os02g52220/LOC_Os02g53530/LOC_Os02g55310/LOC_Os02g56570/LOC_Os02g56820/LOC_Os02g57120/LOC_Os03g03920/LOC_Os03g11680/LOC_Os03g…	67
GO:0003723	RNA binding	62/3077	867/25974	0.6	0.999999	0.936721	LOC_Os01g04200/LOC_Os01g10140/LOC_Os01g31810/LOC_Os01g36600/LOC_Os01g37870/LOC_Os01g42460/LOC_Os01g47750/LOC_Os01g55290/LOC_Os01g56969/LOC_Os01g59730/LOC_Os01g68790/LOC_Os01g73950/LOC_Os01g74340/LOC_Os02g14760/LOC_Os02g42210/LOC_Os02g51890/LOC_Os02g52220/LOC_Os02g55310/LOC_Os03g06440/LOC_Os03g22340/LOC_Os03g23050/LOC_Os03g38740/LOC_Os03g50560/LOC_Os03g53170/LOC_Os04g16818/LOC_Os04g28310/LOC_Os04g…	62
GO:0005509	calcium ion binding	61/3077	338/25974	1.52	0.000523558	0.0159593	LOC_Os01g26174/LOC_Os01g26210/LOC_Os01g26280/LOC_Os01g39770/LOC_Os01g51754/LOC_Os01g59090/LOC_Os01g72530/LOC_Os02g14980/LOC_Os02g36850/LOC_Os02g50060/LOC_Os02g50174/LOC_Os02g51750/LOC_Os02g56370/LOC_Os03g03660/LOC_Os03g54100/LOC_Os03g59600/LOC_Os03g62430/LOC_Os04g14304/LOC_Os04g21790/LOC_Os04g24220/LOC_Os04g29580/LOC_Os04g29680/LOC_Os04g29960/LOC_Os04g30010/LOC_Os04g30240/LOC_Os04g47300/LOC_Os04g…	61
GO:0043565	sequence-specific DNA binding	60/3077	405/25974	1.25	0.0401784	0.35044	LOC_Os01g08710/LOC_Os01g09080/LOC_Os01g09100/LOC_Os01g14440/LOC_Os01g18584/LOC_Os01g24070/LOC_Os01g40430/LOC_Os01g43650/LOC_Os01g53260/LOC_Os01g60640/LOC_Os01g61080/LOC_Os02g05640/LOC_Os02g12790/LOC_Os02g35770/LOC_Os02g45760/LOC_Os02g53530/LOC_Os03g06630/LOC_Os03g08960/LOC_Os03g10210/LOC_Os03g11680/LOC_Os03g21710/LOC_Os03g25120/LOC_Os04g35250/LOC_Os05g03740/LOC_Os05g03900/LOC_Os05g37170/LOC_Os05g…	60
GO:0046983	protein dimerization activity	60/3077	585/25974	0.87	0.899571	0.90159	LOC_Os01g01600/LOC_Os01g06640/LOC_Os01g09990/LOC_Os01g10504/LOC_Os01g36064/LOC_Os01g66030/LOC_Os01g67850/LOC_Os02g12820/LOC_Os02g31160/LOC_Os02g36924/LOC_Os02g45170/LOC_Os02g47660/LOC_Os02g58170/LOC_Os03g08754/LOC_Os03g14850/LOC_Os03g42100/LOC_Os03g51910/LOC_Os03g56950/LOC_Os03g59670/LOC_Os04g01470/LOC_Os04g09604/LOC_Os04g11970/LOC_Os04g35010/LOC_Os04g52770/LOC_Os05g01256/LOC_Os05g11070/LOC_Os05g…	60
GO:0008194	UDP-glycosyltransferase activity	59/3077	204/25974	2.44	3.52911e-11	3.22728e-09	LOC_Os01g08090/LOC_Os01g08440/LOC_Os01g41430/LOC_Os01g45140/LOC_Os01g49230/LOC_Os01g49240/LOC_Os01g53370/LOC_Os01g53420/LOC_Os01g53430/LOC_Os01g64910/LOC_Os02g10880/LOC_Os02g11640/LOC_Os02g14540/LOC_Os02g14630/LOC_Os02g14680/LOC_Os02g28900/LOC_Os02g51900/LOC_Os03g49550/LOC_Os03g55030/LOC_Os03g55050/LOC_Os03g60960/LOC_Os03g62480/LOC_Os04g12900/LOC_Os04g12980/LOC_Os04g20474/LOC_Os04g25440/LOC_Os04g…	59
GO:0030246	carbohydrate binding	55/3077	222/25974	2.09	6.65438e-08	3.24547e-06	LOC_Os01g06500/LOC_Os01g24710/LOC_Os02g08030/LOC_Os02g10860/LOC_Os02g19530/LOC_Os02g19550/LOC_Os02g36770/LOC_Os02g48200/LOC_Os02g48210/LOC_Os02g56820/LOC_Os03g15020/LOC_Os03g35600/LOC_Os03g53710/LOC_Os03g60810/LOC_Os04g12390/LOC_Os04g26320/LOC_Os04g38540/LOC_Os04g57860/LOC_Os05g12150/LOC_Os05g43690/LOC_Os05g49430/LOC_Os06g14260/LOC_Os06g46340/LOC_Os07g03780/LOC_Os07g03790/LOC_Os07g03820/LOC_Os07g…	55
GO:0016740	transferase activity	55/3077	670/25974	0.69	0.999188	0.936721	LOC_Os01g01860/LOC_Os01g08760/LOC_Os01g08880/LOC_Os01g22740/LOC_Os01g24620/LOC_Os01g27340/LOC_Os01g27360/LOC_Os01g57520/LOC_Os01g67850/LOC_Os01g72130/LOC_Os01g72170/LOC_Os01g74320/LOC_Os02g08270/LOC_Os02g11720/LOC_Os02g14190/LOC_Os02g51410/LOC_Os03g04260/LOC_Os03g06910/LOC_Os03g13690/LOC_Os03g38560/LOC_Os03g46230/LOC_Os03g52820/LOC_Os03g57200/LOC_Os04g01160/LOC_Os04g17660/LOC_Os04g54800/LOC_Os05g…	55
[truncated: 754 more rows]

## Sheet: S8
Table S8 Mapman Analysis of the differentially expressed genes
Bin	Name	Elements	p value
30	Signaling	392	3.6144802366355755E-4
[truncated: 1,325 more rows]

## Sheet: S9
Table S9 RNA-Seq data of seven genes which has been reported in previous studies
[truncated: 12 more rows]

## Sheet: S10
Table S10 Change of expression level of some differentially expressed genes calculated based on RNA-seq data using Log2FC value
[truncated: 20 more rows]
